# Supplementary material for: Partial Unlock for COVID-19-Like Epidemics Can Save 1-3 Million Lives Worldwide
Source: Preprints.org preprint supplement (doi:10.20944/preprints202004.0239.v4), 2020-05-16
Supplement: Supplementary file 2 [file supplementary]

## Sheet: US-likely
2020-05-15	2020-05-15	2040-10-01	2020-06-15	2020-08-15	2020-11-01	2021-02-01	scale all unlocks by	0-main region, 1-subregion, 2-without sub	Use Daily Intermittent Unlock->1	UNLOCK ALL->1	Initial & Unlocked R0	Total / Known case ratio	Mortality as % of vent cases enter at right	FINAL CASES	Econ Cost % 18-month lock down	Total Est. Deaths	Use proportional vent. alloc.	Initial Known Cases on Vent.	Vents per capita	Spreading Window (Days)	Case Duration	Vents avail for current region	Vents main region	Vents subregion (if not auto alloc)	Pre-Peak Vent. Util. Target	MWFSa or late Vent. Util. Target	TTSu Vent. Util. Target	Population	Population main region	Population subregion (e.g. NY St.)	Name of main region	Name of sub-region	Ventil mfg rate/day	Change per day in crit cases on vent 180 days only	region mortality % of vent cases	sub-region mortality % of vent cases	region w/o sub-region mortality % vent cases	immunity wears off (days)	population growth rate	ending 08/11/21	economic efficiency of unlock	low season start month	low season duration (months)	low season R0 max reduction
0	0.2	RE- LOCK	0.4	0.5	0.8	1	1	0	0	0	2.5	15	1.05	0.634671	0.267874	240022	0	0.05	0.000339394	6	14	100000	100000	12000	0.4	0.4	0.4	330000000	330000000	31897000	US	NYNJCT	300	0.0004	1.05	1.5	0.88	730	0.006	2021-02-28	1.2	5	5	0.85
Date	Predicted Known cases	US known cases	US known cases	NYNJCT known cases	Target Vent. Util.	Knwn Spreading Cases, unlk 80%, immu. 730 da., ratio=15, seasonal dur.5 mths. low 0.85*R0	Known Active Cases	Total Cum. Cases	US Known New Cases	US COVID-19 Replication Rate (R0)	Unlock this day of the week on:	Lock-down ON/OFF	5.5	US cases - ending 08/11/21	historical known cases	UNLOCK %, R0=2.5, Deaths=0.24M, Cost=26.8%, Efficiency gain 1.2	ventilator utilization, 100000+300/day, improve 0.04%/day	predicted active cases, case ratio=15, low season 0.85*R0 for 5 months	present herd immunity threshold (60% nominal)	predicted active cases as of 3/21	predicted active cases as of 3/21	potential unlock effectiveness	suscepti-bility	last fully locked R0	current # ventils	current % known cases on vent	Econ Cost %	unused	susceptibility change rate	Rt	US pred	NY pred	US excl NY pred	predicted from date	Est. Deaths	cases end date	date		population	date of non-decreasing susceptibility	immunity lapsed	R0 reduction
2020-03-21	24000	24000	24000	11930	0	24000	24000	360000	6226.59	2.5	2021-01-01	0	2020-03-21	0.00109091	0.00109091	0.2	0.012	0.00109091	0.6	0.00423529	0.00423529	0.2	0.998909	2.5	100000	0.05	0.76		1	2.49727	0.00423529	0.0062136	0.00426375	2020-05-14	326.896	2021-08-11		delta-cases	330000000	2021-02-28	0	1
2020-03-22	32821	32821	32821	17429	0	32821	32821	492315	8821	2.35262	2021-01-01	1	2020-03-22	0.00149184	0.00149184	0	0.0162792	0.00149184	0.574943	0.00599253	0.00599253	0	0.998508	2.35262	100000	0.0496	1		0.999599	2.34912	0.00599253	0.00878651	0.00603274	2020-05-14	786.294	2021-08-11	2020-03-22	8821	3.30005e+08	2021-02-28	0	1
2020-03-23	43600	43600	43600	24158	0	43600	43600	654000	10779	2.16157	2021-01-01	1	2020-03-23	0.00198175	0.00198175	0	0.0214526	0.00198175	0.537372	0.00847445	0.00847445	0	0.998018	2.42631	100000	0.0492032	1		0.999509	2.15728	0.00847445	0.0124154	0.00853121	2020-05-14	1343.17	2021-08-11	2020-03-23	10779	3.30011e+08	2021-02-28	0	1
2020-03-24	53870	53870	53870	29996	0	53870	53870	808050	10270	2.10687	2021-01-01	1	2020-03-24	0.00244852	0.00244852	0	0.0262937	0.00244852	0.525363	0.0119755	0.0119755	0	0.997551	2.33806	100000	0.0488096	1		0.999532	2.10171	0.0119755	0.0175242	0.0120556	2020-05-14	1869.51	2021-08-11	2020-03-24	10270	3.30016e+08	2021-02-28	0	1
2020-03-25	67857	67857	67857	38393	0	67857	67857	1017855	13987	2.04473	2021-01-01	1	2020-03-25	0.00308421	0.00308421	0	0.0328557	0.00308421	0.510938	0.0169056	0.0169056	0	0.996916	2.28027	100000	0.0484191	1		0.999363	2.03843	0.0169056	0.0246981	0.0170182	2020-05-14	2580.61	2021-08-11	2020-03-25	13987	3.30022e+08	2021-02-28	0	1
2020-03-26	84773	84773	84773	46945	0	84773	84773	1271595	16916	1.95223	2021-01-01	1	2020-03-26	0.003853	0.003853	0	0.040718	0.003853	0.487764	0.0238305	0.0238305	0	0.996147	2.23316	100000	0.0480317	1		0.999229	1.9447	0.0238305	0.0347348	0.0239884	2020-05-14	3433.74	2021-08-11	2020-03-26	16916	3.30027e+08	2021-02-28	0	1
2020-03-27	102738	102738	102738	54861	0	78738	102738	1541070	17965	1.84384	2021-01-01	1	2020-03-27	0.00466945	0.00466945	0	0.0375167	0.00466945	0.457652	0.0335233	0.0335233	0	0.995331	2.18634	100000	0.0476475	1		0.99918	1.83523	0.0335233	0.0487049	0.0337438	2020-05-14	4332.53	2021-08-11	2020-03-27	17965	3.30033e+08	2021-02-28	0	1
2020-03-28	122070	122070	122070	66164	0	89249	122070	1831050	19332	1.82848		1	2020-03-28	0.005548	0.005548	0	0.0421847	0.005548	0.453099	0.04674	0.04674	0	0.994452	2.13741	100000	0.0472663	1		0.999117	1.81834	0.04674	0.0676022	0.0470444	2020-05-14	5291.97	2021-08-11	2020-03-28	19332	3.30038e+08	2021-02-28	0	1
2020-03-29	140321	140321	140321	75162	0	96721	140321	2104815	18251	1.71288		1	2020-03-29	0.00637739	0.00637739	0	0.0453507	0.00637739	0.416188	0.0643276	0.0643276	0	0.993623	2.04148	100000	0.0468882	1		0.999166	1.70196	0.0643276	0.0924662	0.0647407	2020-05-14	6190.51	2021-08-11	2020-03-29	18251	3.30043e+08	2021-02-28	0	1
2020-03-30	162417	162417	162417	86669	0	108547	162417	2436255	22096	1.68898		1	2020-03-30	0.0073815	0.0073815	0	0.0504885	0.0073815	0.407925	0.0874799	0.0874799	0	0.992619	1.95009	100000	0.0465131	1		0.998989	1.67651	0.0874799	0.124697	0.0880308	2020-05-14	7269.65	2021-08-11	2020-03-30	22096	3.30049e+08	2021-02-28	0	1
2020-03-31	187500	187500	187500	98035	0	119643	187500	2812500	25083	1.6542		1	2020-03-31	0.00852133	0.00852133	0	0.0552044	0.00852133	0.39548	0.117531	0.117531	0	0.991479	1.88257	100000	0.046141	1		0.998852	1.64011	0.117531	0.165675	0.118252	2020-05-14	8484.87	2021-08-11	2020-03-31	25083	3.30054e+08	2021-02-28	0	1
2020-04-01	214465	214465	214465	110175	0	129692	214465	3216975	26965	1.60208		1	2020-04-01	0.00974665	0.00974665	0	0.0593624	0.00974665	0.375813	0.155829	0.155829	0	0.990253	1.81791	100000	0.0457718	1		0.998764	1.58647	0.155829	0.216486	0.156751	2020-05-14	9780.82	2021-08-11	2020-04-01	26965	3.3006e+08	2021-02-28	0	1
2020-04-02	244000	244000	244000	122385	0	141262	244000	3660000	29535	1.57791		1	2020-04-02	0.0110887	0.0110887	0	0.064141	0.0110887	0.366252	0.203501	0.203501	0	0.988911	1.75467	100000	0.0454057	1		0.998645	1.56042	0.203501	0.277513	0.204647	2020-05-14	11188.9	2021-08-11	2020-04-02	29535	3.30065e+08	2021-02-28	0	1
2020-04-03	276000	276000	276000	138461	0	153930	276000	4140000	32000	1.54834		1	2020-04-03	0.0125428	0.0125428	0	0.0693338	0.0125428	0.354149	0.261084	0.261084	0	0.987457	1.7012	100000	0.0450424	1		0.99853	1.52892	0.261084	0.347953	0.262462	2020-05-14	12702.4	2021-08-11	2020-04-03	32000	3.30071e+08	2021-02-28	0	1
2020-04-04	310500	310500	310500	155363	0	170179	286500	4657500	34500	1.51828		1	2020-04-04	0.0141104	0.0141104	0	0.0760395	0.0130197	0.341359	0.311259	0.311259	0	0.98589	1.65898	100000	0.0446821	1		0.998412	1.49685	0.311259	0.400831	0.312737	2020-05-14	14321	2021-08-11	2020-04-04	34500	3.30076e+08	2021-02-28	0	1
2020-04-05	336327	336327	336327	167265	0	173910	303506	5044905	25827	1.38878		1	2020-04-05	0.0152838	0.0152838	0	0.077085	0.0137923	0.279943	0.379179	0.379179	0	0.984716	1.61467	100000	0.0443246	1		0.99881	1.36755	0.379179	0.471759	0.38077	2020-05-14	15523	2021-08-11	2020-04-05	25827	3.30081e+08	2021-02-28	0	1
2020-04-06	364028	364028	364028	180057	0	176528	320428	5460420	27701	1.35278		1	2020-04-06	0.0165424	0.0165424	0	0.0776194	0.0145611	0.260779	0.448852	0.448852	0	0.983458	1.56837	100000	0.04397	1		0.998722	1.3304	0.448852	0.537363	0.45045	2020-05-14	16801.9	2021-08-11	2020-04-06	27701	3.30087e+08	2021-02-28	0	1
2020-04-07	395000	395000	395000	193900	0	180535	341130	5925000	30972	1.32813		1	2020-04-07	0.0179495	0.0179495	0	0.0787462	0.0155016	0.247064	0.515085	0.515085	0	0.98205	1.52034	100000	0.0436183	1		0.998569	1.30429	0.515085	0.591865	0.516562	2020-05-14	18220.4	2021-08-11	2020-04-07	30972	3.30092e+08	2021-02-28	0	1
2020-04-08	426659	426659	426659	207489	0	182659	358802	6399885	31659	1.28047		1	2020-04-08	0.0193879	0.0193879	0	0.0790353	0.0163044	0.219034	0.572266	0.572266	0	0.980612	1.47376	100000	0.0432693	1		0.998535	1.25564	0.572266	0.630591	0.573491	2020-05-14	19658.7	2021-08-11	2020-04-08	31659	3.30098e+08	2021-02-28	0	1
2020-04-09	466546	466546	466546	222847	0	190546	381773	6998190	39887	1.3179		1	2020-04-09	0.0212	0.0212	0	0.0817884	0.0173479	0.241215	0.615228	0.615228	0	0.9788	1.42781	100000	0.0429232	1		0.998152	1.28996	0.615228	0.650371	0.616094	2020-05-14	21456.4	2021-08-11	2020-04-09	39887	3.30103e+08	2021-02-28	0	1
2020-04-10	502000	502000	502000	237956	0	191500	399262	7530000	35454	1.26072		1	2020-04-10	0.0228107	0.0228107	0	0.0815403	0.0181423	0.206804	0.640319	0.640319	0	0.977189	1.39067	100000	0.0425798	1		0.998354	1.23196	0.640319	0.649909	0.64076	2020-05-14	23041.5	2021-08-11	2020-04-10	35454	3.30109e+08	2021-02-28	0	1
2020-04-11	531257	531257	531257	252651	0	194930	409187	7968855	29257	1.19394		1	2020-04-11	0.0241397	0.0241397	0	0.0823368	0.018593	0.162436	0.64573	0.64573	0	0.97586	1.34958	100000	0.0422391	1		0.99864	1.16512	0.64573	0.629468	0.645721	2020-05-14	24339.1	2021-08-11	2020-04-11	29257	3.30114e+08	2021-02-28	0	1
2020-04-12	560402	560402	560402	265310	0	196374	420081	8406030	29145	1.16741		1	2020-04-12	0.0254636	0.0254636	0	0.0822831	0.0190877	0.143404	0.631305	0.631305	0	0.974536	1.30324	100000	0.0419012	1		0.998643	1.13769	0.631305	0.590562	0.63085	2020-05-14	25621.4	2021-08-11	2020-04-12	29145	3.30119e+08	2021-02-28	0	1
2020-04-13	585290	585290	585290	275938	0	190290	422873	8779350	24888	1.09562		1	2020-04-13	0.026594	0.026594	0	0.0788594	0.0192142	0.0872787	0.598222	0.598222	0	0.973406	1.27162	100300	0.041566	1		0.99884	1.06649	0.598222	0.535908	0.597358	2020-05-14	26707.6	2021-08-11	2020-04-13	24888	3.30125e+08	2021-02-28	0	1
2020-04-14	611745	611745	611745	288188	0	185086	424245	9176175	26455	1.07278		1	2020-04-14	0.0277956	0.0277956	0	0.0758623	0.0192763	0.0678431	0.548788	0.548788	0	0.972204	1.23488	100600	0.0412335	1		0.998766	1.04296	0.548788	0.469442	0.547575	2020-05-14	27853	2021-08-11	2020-04-14	26455	3.3013e+08	2021-02-28	0	1
2020-04-15	644025	644025	644025	302915	0	177479	429560	9660375	32280	1.09556		1	2020-04-15	0.0292618	0.0292618	0	0.0719478	0.0195174	0.0872269	0.486447	0.486447	0	0.970738	1.19841	100900	0.0409036	1		0.998492	1.0635	0.486447	0.396228	0.484974	2020-05-14	29239.4	2021-08-11	2020-04-15	32280	3.30136e+08	2021-02-28	0	1
2020-04-16	676339	676339	676339	316962	0	174339	432339	10145085	32314	1.0891		1	2020-04-16	0.0307295	0.0307295	0	0.0699017	0.0196434	0.081811	0.415846	0.415846	0	0.96927	1.17199	101200	0.0405764	1		0.998488	1.05563	0.415846	0.322038	0.414229	2020-05-14	30616.1	2021-08-11	2020-04-16	32314	3.30141e+08	2021-02-28	0	1
2020-04-17	709201	709201	709201	328569	0	177944	433201	10638015	32862	1.0971		1	2020-04-17	0.0322221	0.0322221	0	0.0705671	0.0196822	0.0885087	0.342499	0.342499	0	0.967778	1.13931	101500	0.0402518	1		0.99846	1.06175	0.342499	0.252379	0.340868	2020-05-14	32005	2021-08-11	2020-04-17	32862	3.30146e+08	2021-02-28	0	1
2020-04-18	737023	737023	737023	339512	0	176621	426523	11055345	27822	1.05497		1	2020-04-18	0.0334856	0.0334856	0	0.0692774	0.0193785	0.0521061	0.271967	0.271967	0	0.966514	1.11593	101800	0.0399298	1		0.998694	1.01964	0.271967	0.1914	0.270444	2020-05-14	33171.5	2021-08-11	2020-04-18	27822	3.30152e+08	2021-02-28	0	1
2020-04-19	764265	764265	764265	350004	0	178975	427938	11463975	27242	1.04165		1	2020-04-19	0.0347228	0.0347228	0	0.0694345	0.0194425	0.0399876	0.208799	0.208799	0	0.965277	1.09608	102100	0.0396103	1		0.99872	1.00548	0.208799	0.141228	0.207471	2020-05-14	34304.5	2021-08-11	2020-04-19	27242	3.30157e+08	2021-02-28	0	1
2020-04-20	792759	792759	792759	360229	0	181014	428731	11891385	28494	1.03724		1	2020-04-20	0.0360167	0.0360167	0	0.0694596	0.0194782	0.0359044	0.155711	0.155711	0	0.963983	1.07811	102400	0.0392935	1		0.998659	0.999884	0.155711	0.102024	0.154622	2020-05-14	35480.1	2021-08-11	2020-04-20	28494	3.30163e+08	2021-02-28	0	1
2020-04-21	816385	816385	816385	368679	0	172360	421385	12245775	23626	0.979247		1	2020-04-21	0.0370895	0.0370895	0	0.0654181	0.0191441	0	0.113447	0.113447	0	0.96291	1.06977	102700	0.0389791	1		0.998887	0.942927	0.113447	0.0726087	0.112597	2020-05-14	36447.1	2021-08-11	2020-04-21	23626	3.30168e+08	2021-02-28	0	1
2020-04-22	848994	848994	848994	379925	0	172655	422335	12734910	32609	1.04832		1	2020-04-22	0.0385703	0.0385703	0	0.0648165	0.019187	0.0460948	0.0812314	0.0812314	0	0.96143	1.05641	103000	0.0386673	1		0.998462	1.00789	0.0812314	0.0512009	0.0805932	2020-05-14	37771	2021-08-11	2020-04-22	32609	3.30174e+08	2021-02-28	0	1
2020-04-23	879430	879430	879430	391021	0	170229	412884	13191450	30436	1.03063		1	2020-04-23	0.0399524	0.0399524	0	0.0632104	0.0187573	0.0297158	0.0574769	0.0574769	0	0.960048	1.04966	103300	0.0383579	1		0.998562	0.98945	0.0574769	0.0359644	0.0570121	2020-05-14	38996.8	2021-08-11	2020-04-23	30436	3.30179e+08	2021-02-28	0	1
2020-04-24	925038	925038	925038	402335	0	188015	423038	13875570	45608	1.16643		1	2020-04-24	0.0420237	0.0420237	0	0.0690557	0.0192183	0.142684	0.0403853	0.0403853	0	0.957976	1.04131	103600	0.0380511	1		0.997843	1.11741	0.0403853	0.0252946	0.0400546	2020-05-14	40819	2021-08-11	2020-04-24	45608	3.30184e+08	2021-02-28	0	1
2020-04-25	960525	960525	960525	417006	0	196260	429268	14407875	35487	1.09446		1	2020-04-25	0.0436351	0.0436351	0	0.0713009	0.019501	0.08631	0.028305	0.028305	0	0.956365	1.05121	103900	0.0377467	1		0.998318	1.04671	0.028305	0.0179096	0.0280741	2020-05-14	42225.5	2021-08-11	2020-04-25	35487	3.3019e+08	2021-02-28	0	1
2020-04-26	987322	987322	987322	427221	0	194563	426920	14809830	26797	1.02769		1	2020-04-26	0.0448517	0.0448517	0	0.069917	0.019394	0.0269414	0.0198761	0.0198761	0	0.955148	1.05685	104200	0.0374447	1		0.998728	0.981594	0.0198761	0.0128402	0.0197175	2020-05-14	43279.1	2021-08-11	2020-04-26	26797	3.30195e+08	2021-02-28	0	1
2020-04-27	1010356	1010356	1010356	434176	0	193971	425066	15155340	23034	0.999728		1	2020-04-27	0.0458973	0.0458973	0	0.0689481	0.0193094	0	0.0140488	0.0140488	0	0.954103	1.05486	104500	0.0371451	1		0.998905	0.953843	0.0140488	0.00937982	0.0139416	2020-05-14	44177.5	2021-08-11	2020-04-27	23034	3.30201e+08	2021-02-28	0	1
2020-04-28	1035765	1035765	1035765	440444	0	186771	424020	15536475	25409	0.97696		1	2020-04-28	0.0470508	0.0470508	0	0.0656692	0.0192616	0	0.0100459	0.0100459	0	0.952949	1.0495	104800	0.036848	1		0.998791	0.930994	0.0100459	0.00702672	0.00997476	2020-05-14	45160.6	2021-08-11	2020-04-28	25409	3.30206e+08	2021-02-28	0	1
2020-04-29	1064194	1064194	1064194	448025	0	184764	420169	15962910	28429	0.979414		1	2020-04-29	0.0483415	0.0483415	0	0.0642599	0.0190864	0	0.00730826	0.00730826	0	0.951659	1.04917	105100	0.0365532	1		0.998646	0.932067	0.00730826	0.0054306	0.00726219	2020-05-14	46251.7	2021-08-11	2020-04-29	28429	3.30212e+08	2021-02-28	0	1
2020-04-30	1094464	1094464	1094464	456048	0	169426	418125	16416960	30270	0.984771		1	2020-04-30	0.0497157	0.0497157	0	0.0582876	0.0189932	0	0.00544148	0.00544148	0	0.950284	1.03933	105400	0.0362608	1		0.998556	0.935813	0.00544148	0.00434964	0.00541275	2020-05-14	47404.2	2021-08-11	2020-04-30	30270	3.30217e+08	2021-02-28	0	1
2020-05-01	1129882	1129882	1129882	463529	0	169357	420681	16948230	35418	1.04886		1	2020-05-01	0.0513237	0.0513237	0	0.0576337	0.019109	-0.0307232	0.00417115	0.00417115	0	0.948676	1.03278	105700	0.0359707	1		0.998308	0.995026	0.00417115	0.00361814	0.00415436	2020-05-14	48741.9	2021-08-11	2020-05-01	35418	3.30222e+08	2021-02-28	0	0.925
2020-05-02	1160774	1160774	1160774	471138	0.4	173452	423751	17411610	30892	1.02687		1	2020-05-02	0.052726	0.052726	0	0.0583894	0.0192481	-0.0527907	0.00330788	0.00330788	0	0.947274	1.01598	106000	0.0356829	1		0.998522	0.972729	0.00330788	0.00312305	0.00329927	2020-05-14	49899.3	2021-08-11	2020-05-02	30892	3.30228e+08	2021-02-28	0	0.925
2020-05-03	1186073	1186073	1186073	477864	0.4	175717	421808	17791095	25299	0.983909		1	2020-05-03	0.0538743	0.0538743	0	0.058513	0.0191595	0	0.00272166	0.00272166	0	0.946126	1.00633	106300	0.0353974	1		0.998788	0.930901	0.00272166	0.00278757	0.00271865	2020-05-14	50839.6	2021-08-11	2020-05-03	25299	3.30233e+08	2021-02-28	0	0.925
2020-05-04	1210267	1210267	1210267	482599	0.4	174502	417508	18154005	24194	0.97144		1	2020-05-04	0.0549724	0.0549724	0	0.0574813	0.0189639	0	0.00232361	0.00232361	0	0.945028	1.00007	106600	0.0351143	1		0.998839	0.918038	0.00232361	0.00255972	0.00232443	2020-05-14	51731.7	2021-08-11	2020-05-04	24194	3.30239e+08	2021-02-28	0	0.925
2020-05-05	1236141	1236141	1236141	487873	0.4	171947	419756	18542115	25874	0.967965		1	2020-05-05	0.0561467	0.0561467	0	0.0560289	0.0190657	0	0.0020532	0.0020532	0	0.943853	0.996032	106900	0.0348334	1		0.998757	0.913617	0.0020532	0.00240436	0.00205661	2020-05-14	52678	2021-08-11	2020-05-05	25874	3.30244e+08	2021-02-28	0	0.925
2020-05-06	1263092	1263092	1263092	492290	0.4	168628	414098	18946380	26951	0.965939		1	2020-05-06	0.0573699	0.0573699	0	0.0543553	0.0188084	0	0.00186925	0.00186925	0	0.94263	0.994747	107200	0.0345547	1		0.998704	0.910523	0.00186925	0.00229777	0.00187442	2020-05-14	53655.9	2021-08-11	2020-05-06	26951	3.3025e+08	2021-02-28	0	0.925
2020-05-07	1292623	1292623	1292623	498350	0.4	162741	413193	19389345	29531	0.989024		1	2020-05-07	0.0587102	0.0587102	0	0.0518928	0.018767	0	0.00174384	0.00174384	0	0.94129	0.992822	107500	0.0342782	1		0.998578	0.930958	0.00174384	0.00222399	0.0017502	2020-05-14	54718.7	2021-08-11	2020-05-07	29531	3.30255e+08	2021-02-28	0	0.925
2020-05-08	1321497	1321497	1321497	503669	0.4	160723	396459	19822455	28874	0.996867		1	2020-05-08	0.0600207	0.0600207	0	0.0506978	0.0180067	0	0.00165804	0.00165804	0	0.939979	0.993429	107800	0.034004	1		0.998608	0.937034	0.00165804	0.00217225	0.0016652	2020-05-14	55749.7	2021-08-11	2020-05-08	28874	3.3026e+08	2021-02-28	0	0.925
2020-05-09	1347309	1347309	1347309	508588	0.4	161236	386784	20209635	25812	0.978856		1	2020-05-09	0.061192	0.061192	0	0.0503128	0.0175669	0	0.00159901	0.00159901	0	0.938808	0.986002	108100	0.033732	1		0.998754	0.918958	0.00159901	0.00213531	0.0016067	2020-05-14	56663.9	2021-08-11	2020-05-09	25812	3.30266e+08	2021-02-28	0	0.925
2020-05-10	1367406	1367406	1367406	512743	0.4	157139	380084	20511090	20097	0.928152		1	2020-05-10	0.0621038	0.0621038	0	0.0485074	0.0172624	0	0.00155807	0.00155807	0	0.937896	0.979143	108400	0.0334621	1		0.999029	0.87051	0.00155807	0.00210832	0.00156611	2020-05-14	57370	2021-08-11	2020-05-10	20097	3.30271e+08	2021-02-28	0	0.925
2020-05-11	1384033	1384033	1384033	515977	0.4	147892	373677	20760495	16627	0.884685		1	2020-05-11	0.0628579	0.0628579	0	0.0451628	0.0169711	0	0.00152936	0.00152936	0	0.937142	0.971178	108700	0.0331944	1		0.999196	0.829075	0.00152936	0.002088	0.00153762	2020-05-14	57949.5	2021-08-11	2020-05-11	16627	3.30277e+08	2021-02-28	0	0.925
2020-05-12	1408636	1408636	1408636	525067	0.4	145544	372871	21129540	24603	0.94746		1	2020-05-12	0.0639742	0.0639742	0	0.0439688	0.0169342	0	0.0015089	0.0015089	0	0.936026	0.958784	109000	0.0329289	1		0.998809	0.886847	0.0015089	0.00207216	0.0015173	2020-05-14	58800.2	2021-08-11	2020-05-12	24603	3.30282e+08	2021-02-28	0	0.925
2020-05-13	1430348	1430348	1430348	528564	0.4	137725	366154	21455220	21712	0.913842		1	2020-05-13	0.0649592	0.0649592	0	0.0411606	0.0166289	0	0.00149401	0.00149401	0	0.935041	0.955855	109300	0.0326654	1		0.998948	0.854479	0.00149401	0.00205932	0.0015025	2020-05-14	59544.9	2021-08-11	2020-05-13	21712	3.30288e+08	2021-02-28	0	0.925
2020-05-14	1454330	1454330	1454330	532032	0.4	132833	359866	21814950	23982	0.947691		1	2020-05-14	0.0660473	0.0660473	0	0.0392731	0.016343	0	0.00148288	0.00148288	0	0.933953	0.948412	109600	0.0324041	1		0.998836	0.885099	0.00148288	0.00204852	0.00149141	2020-05-14	60360.8	2021-08-11	2020-05-14	23982	3.30293e+08	2021-02-28	0	0.925
2020-05-15	1.4736e+06	0		0	0.4	126291	343718	2.2104e+07	19270.4	1.00756		0	2020-05-15	0.0669213		0.2	0.0369392	0.0156094	-0.0729742	0.00147429	0.00147429	0.2	0.933079	0.942507	109900	0.0321449	0.76		0.999064	0.940129	0.00147429	0.00203907	0.00148284	00:00:00	61011.3	2021-08-11	2020-05-15	-1454330	3.30298e+08	2021-02-28	0	0.925
2020-05-16	1.49216e+06	0		0	0.4	124750	331382	2.23823e+07	18555.7	1.0214		0	2020-05-16	0.0677629		0.2	0.036098	0.015049	-0.0584322	0.00146742	0.00146742	0.2	0.932237	0.942507	110200	0.0318877	0.76		0.999098	0.952186	0.00146742	0.00203055	0.00147596	00:00:00	61632.6	2021-08-11	2020-05-16	0	3.30304e+08	2021-02-28	0	0.925
2020-05-17	1.51095e+06	0		0	0.4	126918	324878	2.26643e+07	18794.8	1.04829		0	2020-05-17	0.0686153		0.2	0.0363326	0.0147533	-0.0312828	0.0014617	0.0014617	0.2	0.931385	0.942507	110500	0.0316326	0.76		0.999086	0.976359	0.0014617	0.00202266	0.00147023	00:00:00	62256.8	2021-08-11	2020-05-17	0	3.30309e+08	2021-02-28	0	0.925
2020-05-18	1.53051e+06	0		0	0.4	121877	320246	2.29577e+07	19562.3	1.07344		0	2020-05-18	0.0695025		0.2	0.0345167	0.0145428	-0.00712119	0.00145677	0.00145677	0.2	0.930498	0.942507	110800	0.0313796	0.76		0.999047	0.99883	0.00145677	0.00201519	0.00146527	00:00:00	62901.4	2021-08-11	2020-05-18	0	3.30315e+08	2021-02-28	0	0.925
2020-05-19	1.54957e+06	0		0	0.4	119221	313428	2.32435e+07	19055.4	1.08991		0	2020-05-19	0.0703667		0.2	0.0334038	0.0142329	0.00809811	0.00145236	0.00145236	0.2	0.929633	0.942507	111100	0.0311285	0.76		0.999071	1.01321	0.00145236	0.00200801	0.00146084	00:00:00	63524.2	2021-08-11	2020-05-19	0	3.3032e+08	2021-02-28	0	0.925
2020-05-20	1.56848e+06	0		0	0.4	114154	305392	2.35273e+07	18915.4	1.10703		0	2020-05-20	0.0712244		0.2	0.0316429	0.0138678	0.0234441	0.00144832	0.00144832	0.2	0.928776	0.942507	111400	0.0308795	0.76		0.999077	1.02819	0.00144832	0.00200105	0.00145676	00:00:00	64137.5	2021-08-11	2020-05-20	0	3.30326e+08	2021-02-28	0	0.925
2020-05-21	1.58682e+06	0		0	0.4	113218	294196	2.38023e+07	18334.8	1.12172		0	2020-05-21	0.0720558		0.2	0.0310489	0.0133591	0.0362301	0.00144452	0.00144452	0.2	0.927944	0.942507	111700	0.0306325	0.76		0.999105	1.04089	0.00144452	0.00199423	0.00145293	00:00:00	64727.2	2021-08-11	2020-05-21	0	3.30331e+08	2021-02-28	0	0.925
2020-05-22	1.60518e+06	0		0	0.4	113026	283686	2.40777e+07	18363.8	1.13379		0	2020-05-22	0.0728885		0.2	0.0306659	0.0128817	0.046491	0.0014409	0.0014409	0.2	0.927111	0.942507	112000	0.0303874	0.76		0.999103	1.05115	0.0014409	0.00198752	0.00144927	00:00:00	65313.1	2021-08-11	2020-05-22	0	3.30336e+08	2021-02-28	0	0.925
2020-05-23	1.62368e+06	0		0	0.4	112725	276367	2.43551e+07	18493.5	1.14476		0	2020-05-23	0.0737271		0.2	0.0302584	0.0125491	0.0556293	0.00143738	0.00143738	0.2	0.926273	0.942507	112300	0.0301443	0.76		0.999096	1.06036	0.00143738	0.00198089	0.00144572	00:00:00	65898.5	2021-08-11	2020-05-23	0	3.30342e+08	2021-02-28	0	0.925
2020-05-24	1.64226e+06	0		0	0.4	111742	274849	2.46338e+07	18579.3	1.1542		0	2020-05-24	0.0745695		0.2	0.0296753	0.01248	0.0633468	0.00143395	0.00143395	0.2	0.925431	0.942507	112600	0.0299032	0.76		0.999091	1.06813	0.00143395	0.00197433	0.00144225	00:00:00	66481.8	2021-08-11	2020-05-24	0	3.30347e+08	2021-02-28	0	0.925
2020-05-25	1.66079e+06	0		0	0.4	111217	276752	2.49118e+07	18530	1.16231		0	2020-05-25	0.0754096		0.2	0.0292217	0.0125662	0.0698892	0.00143058	0.00143058	0.2	0.92459	0.942507	112900	0.0296639	0.76		0.999092	1.07466	0.00143058	0.00196781	0.00143884	00:00:00	67059	2021-08-11	2020-05-25	0	3.30353e+08	2021-02-28	0	0.925
2020-05-26	1.67932e+06	0		0	0.4	110841	270688	2.51899e+07	18539.1	1.16944		0	2020-05-26	0.0762502		0.2	0.0288133	0.0122907	0.0755604	0.00142725	0.00142725	0.2	0.92375	0.942507	113200	0.0294266	0.76		0.999091	1.08027	0.00142725	0.00196135	0.00143547	00:00:00	67631.8	2021-08-11	2020-05-26	0	3.30358e+08	2021-02-28	0	0.925
2020-05-27	1.69788e+06	0		0	0.4	111063	267534	2.54682e+07	18557	1.17562		0	2020-05-27	0.0770915		0.2	0.0285644	0.0121472	0.0804125	0.00142396	0.00142396	0.2	0.922909	0.942507	113500	0.0291912	0.76		0.999089	1.08499	0.00142396	0.00195492	0.00143213	00:00:00	68200.6	2021-08-11	2020-05-27	0	3.30364e+08	2021-02-28	0	0.925
2020-05-28	1.71654e+06	0		0	0.4	111361	262213	2.57482e+07	18661.9	1.18097		0	2020-05-28	0.0779375		0.2	0.028337	0.0119055	0.0845821	0.00142068	0.00142068	0.2	0.922062	0.942507	113800	0.0289577	0.76		0.999083	1.08893	0.00142068	0.00194852	0.00142882	00:00:00	68768	2021-08-11	2020-05-28	0	3.30369e+08	2021-02-28	0	0.925
2020-05-29	1.73531e+06	0		0	0.4	111636	261712	2.60297e+07	18768.7	1.18563		0	2020-05-29	0.0787884		0.2	0.0281057	0.0118825	0.0881831	0.00141743	0.00141743	0.2	0.921212	0.942507	114100	0.028726	0.76		0.999077	1.09222	0.00141743	0.00194217	0.00142553	00:00:00	69334.1	2021-08-11	2020-05-29	0	3.30375e+08	2021-02-28	0	0.925
2020-05-30	1.75417e+06	0		0	0.4	111919	262018	2.63126e+07	18861.9	1.18968		0	2020-05-30	0.0796435		0.2	0.0278781	0.0118962	0.0912851	0.00141419	0.00141419	0.2	0.920357	0.942507	114400	0.0284962	0.76		0.999072	1.09493	0.00141419	0.00193584	0.00142226	00:00:00	69898.5	2021-08-11	2020-05-30	0	3.3038e+08	2021-02-28	0	0.925
2020-05-31	1.77312e+06	0		0	0.4	112337	262171	2.65968e+07	18947.9	1.1932		0	2020-05-31	0.0805024		0.2	0.0276858	0.011903	0.0939632	0.00141097	0.00141097	0.2	0.919498	0.942507	114700	0.0282682	0.76		0.999067	1.09714	0.00141097	0.00192954	0.001419	00:00:00	70460.9	2021-08-11	2020-05-31	0	3.30385e+08	2021-02-28	0	0.925
2020-06-01	1.79049e+06	0		0	0.4	111165	259977	2.68573e+07	17367.9	1.18688		0	2020-06-01	0.0812896		0.2	0.027107	0.0118031	0.0087702	0.00140777	0.00140777	0.2	0.91871	0.942507	115000	0.0280421	0.76		0.999144	1.0904	0.00140777	0.00192327	0.00141575	00:00:00	70972.3	2021-08-11	2020-06-01	0	3.30391e+08	2021-02-28	0	0.85
2020-06-02	1.80767e+06	0		0	0.4	109785	258098	2.7115e+07	17176.6	1.18719		0	2020-06-02	0.0820681		0.2	0.0264871	0.0117176	0.00903023	0.00140457	0.00140457	0.2	0.917932	0.942507	115300	0.0278178	0.76		0.999153	1.08976	0.00140457	0.00191703	0.00141251	00:00:00	71474	2021-08-11	2020-06-02	0	3.30396e+08	2021-02-28	0	0.85
2020-06-03	1.82461e+06	0		0	0.4	108063	256122	2.73691e+07	16940	1.18657		0	2020-06-03	0.0828358		0.2	0.025796	0.0116278	0.00851033	0.00140138	0.00140138	0.2	0.917164	0.942507	115600	0.0275952	0.76		0.999164	1.08828	0.00140138	0.00191082	0.00140929	00:00:00	71964.8	2021-08-11	2020-06-03	0	3.30402e+08	2021-02-28	0	0.85
2020-06-04	1.84124e+06	0		0	0.4	105931	254425	2.76187e+07	16637.1	1.18491		0	2020-06-04	0.0835898		0.2	0.0250199	0.0115505	0.00712357	0.00139821	0.00139821	0.2	0.91641	0.942507	115900	0.0273745	0.76		0.999178	1.08586	0.00139821	0.00190463	0.00140608	00:00:00	72443	2021-08-11	2020-06-04	0	3.30407e+08	2021-02-28	0	0.85
2020-06-05	1.85753e+06	0		0	0.4	103358	252350	2.7863e+07	16288.7	1.18442		0	2020-06-05	0.0843279		0.2	0.0241544	0.0114561	0.00671106	0.00139505	0.00139505	0.2	0.915672	0.942507	116200	0.0271555	0.76		0.999195	1.08454	0.00139505	0.00189848	0.00140288	00:00:00	72907.5	2021-08-11	2020-06-05	0	3.30413e+08	2021-02-28	0	0.85
2020-06-06	1.8734e+06	0		0	0.4	100281	249727	2.8101e+07	15871	1.18373		0	2020-06-06	0.085047		0.2	0.023188	0.0113369	0.00612957	0.00139189	0.00139189	0.2	0.914953	0.942507	116500	0.0269382	0.76		0.999215	1.08305	0.00139189	0.00189235	0.00139969	00:00:00	73356.4	2021-08-11	2020-06-06	0	3.30418e+08	2021-02-28	0	0.85
2020-06-07	1.88878e+06	0		0	0.4	98290.6	246525	2.83317e+07	15377.2	1.18302		0	2020-06-07	0.0857436		0.2	0.0224879	0.0111913	0.00553259	0.00138875	0.00138875	0.2	0.914256	0.942507	116800	0.0267227	0.76		0.999239	1.08158	0.00138875	0.00188625	0.00139651	00:00:00	73787.9	2021-08-11	2020-06-07	0	3.30423e+08	2021-02-28	0	0.85
2020-06-08	1.90383e+06	0		0	0.4	96168.4	243049	2.85575e+07	15054.4	1.18254		0	2020-06-08	0.0864256		0.2	0.0217705	0.0110334	0.00513405	0.00138562	0.00138562	0.2	0.913574	0.942507	117100	0.0265089	0.76		0.999254	1.08034	0.00138562	0.00188017	0.00139334	00:00:00	74206.9	2021-08-11	2020-06-08	0	3.30429e+08	2021-02-28	0	0.85
2020-06-09	1.91855e+06	0		0	0.4	93941	239223	2.87782e+07	14712.6	1.18207		0	2020-06-09	0.0870921		0.2	0.0210422	0.0108595	0.00473902	0.0013825	0.0013825	0.2	0.912908	0.942507	117400	0.0262969	0.76		0.99927	1.07912	0.0013825	0.00187412	0.00139018	00:00:00	74613.1	2021-08-11	2020-06-09	0	3.30434e+08	2021-02-28	0	0.85
2020-06-10	1.9329e+06	0		0	0.4	91660.2	235022	2.89936e+07	14356.3	1.18166		0	2020-06-10	0.0877423		0.2	0.0203151	0.0106686	0.00439077	0.00137938	0.00137938	0.2	0.912258	0.942507	117700	0.0260865	0.76		0.999288	1.07798	0.00137938	0.0018681	0.00138703	00:00:00	75006.4	2021-08-11	2020-06-10	0	3.3044e+08	2021-02-28	0	0.85
2020-06-11	1.9469e+06	0		0	0.4	89365.1	230354	2.92035e+07	13993.7	1.18132		0	2020-06-11	0.0883761		0.2	0.0195981	0.0104565	0.00410491	0.00137628	0.00137628	0.2	0.911624	0.942507	118000	0.0258778	0.76		0.999305	1.07692	0.00137628	0.00186211	0.00138389	00:00:00	75386.6	2021-08-11	2020-06-11	0	3.30445e+08	2021-02-28	0	0.85
2020-06-12	1.96053e+06	0		0	0.4	87124.5	225216	2.94079e+07	13630.3	1.18101		0	2020-06-12	0.0889934		0.2	0.0189058	0.0102231	0.00384729	0.00137318	0.00137318	0.2	0.911007	0.942507	118300	0.0256708	0.76		0.999323	1.07591	0.00137318	0.00185614	0.00138076	00:00:00	75754	2021-08-11	2020-06-12	0	3.30451e+08	2021-02-28	0	0.85
2020-06-13	1.9738e+06	0		0	0.4	85023.9	219630	2.96071e+07	13276.6	1.18075		0	2020-06-13	0.0895946		0.2	0.0182561	0.00996942	0.0036241	0.0013701	0.0013701	0.2	0.910405	0.942507	118600	0.0254654	0.76		0.99934	1.07496	0.0013701	0.00185019	0.00137764	00:00:00	76109	2021-08-11	2020-06-13	0	3.30456e+08	2021-02-28	0	0.85
2020-06-14	1.98675e+06	0		0	0.4	82915	213628	2.98012e+07	12945.5	1.18052		0	2020-06-14	0.0901807		0.2	0.0176162	0.0096968	0.00343225	0.00136703	0.00136703	0.2	0.909819	0.942507	118900	0.0252617	0.76		0.999356	1.07406	0.00136703	0.00184428	0.00137452	00:00:00	76452.4	2021-08-11	2020-06-14	0	3.30461e+08	2021-02-28	0	0.85
2020-06-15	2e+06	0		0	0.4	81448.4	209506	2.99999e+07	13246	1.23945		0	2020-06-15	0.0907805		0.4	0.017123	0.00950954	0.0508106	0.00136396	0.00136396	0.4	0.90922	0.942507	119200	0.0250596	0.52		0.999341	1.12693	0.00136396	0.00183839	0.00137142	00:00:00	76800.9	2021-08-11	2020-06-15	0	3.30467e+08	2021-02-28	0	0.85
2020-06-16	2.01315e+06	0		0	0.4	80248.5	205486	3.01973e+07	13156.4	1.25406		0	2020-06-16	0.0913761		0.4	0.0166938	0.00932691	0.0618676	0.00136091	0.00136091	0.4	0.908624	0.942507	119500	0.0248591	0.52		0.999345	1.13947	0.00136091	0.00183252	0.00136833	00:00:00	77144.3	2021-08-11	2020-06-16	0	3.30472e+08	2021-02-28	0	0.85
2020-06-17	2.0263e+06	0		0	0.4	79398.1	201689	3.03944e+07	13143.4	1.27238		0	2020-06-17	0.0919712		0.4	0.0163437	0.00915443	0.0753799	0.00135786	0.00135786	0.4	0.908029	0.942507	119800	0.0246602	0.52		0.999345	1.15536	0.00135786	0.00182668	0.00136525	00:00:00	77484.6	2021-08-11	2020-06-17	0	3.30478e+08	2021-02-28	0	0.85
2020-06-18	2.03953e+06	0		0	0.4	78997.9	198282	3.05929e+07	13230.1	1.29535		0	2020-06-18	0.0925702		0.4	0.0160909	0.00899965	0.0917724	0.00135482	0.00135482	0.4	0.90743	0.942507	120100	0.0244629	0.52		0.99934	1.17544	0.00135482	0.00182086	0.00136218	00:00:00	77824.5	2021-08-11	2020-06-18	0	3.30483e+08	2021-02-28	0	0.85
2020-06-19	2.05282e+06	0		0	0.4	79018	195290	3.07923e+07	13296.7	1.30932		0	2020-06-19	0.0931722		0.4	0.0159265	0.0088637	0.101466	0.0013518	0.0013518	0.4	0.906828	0.942507	120400	0.0242672	0.52		0.999337	1.18733	0.0013518	0.00181507	0.00135912	00:00:00	78163.3	2021-08-11	2020-06-19	0	3.30489e+08	2021-02-28	0	0.85
2020-06-20	2.06625e+06	0		0	0.4	79504	192851	3.09938e+07	13431.5	1.32314		0	2020-06-20	0.0937802		0.4	0.0158567	0.00875283	0.110849	0.00134878	0.00134878	0.4	0.90622	0.942507	120700	0.0240731	0.52		0.999329	1.19906	0.00134878	0.00180931	0.00135606	00:00:00	78502.8	2021-08-11	2020-06-20	0	3.30494e+08	2021-02-28	0	0.85
2020-06-21	2.07989e+06	0		0	0.4	79892.6	191108	3.11983e+07	13634.6	1.33583		0	2020-06-21	0.0943975		0.4	0.0157676	0.0086736	0.119295	0.00134577	0.00134577	0.4	0.905602	0.942507	121000	0.0238805	0.52		0.999319	1.20973	0.00134577	0.00180357	0.00135302	00:00:00	78844.7	2021-08-11	2020-06-21	0	3.30499e+08	2021-02-28	0	0.85
2020-06-22	2.09368e+06	0		0	0.4	80531.8	189849	3.14053e+07	13795.6	1.34595		0	2020-06-22	0.0950221		0.4	0.0157276	0.00861632	0.125917	0.00134277	0.00134277	0.4	0.904978	0.942507	121300	0.0236895	0.52		0.99931	1.21805	0.00134277	0.00179785	0.00134998	00:00:00	79187.8	2021-08-11	2020-06-22	0	3.30505e+08	2021-02-28	0	0.85
2020-06-23	2.10767e+06	0		0	0.4	81379.3	189127	3.16151e+07	13990.9	1.35511		0	2020-06-23	0.0956555		0.4	0.0157271	0.00858343	0.131823	0.00133978	0.00133978	0.4	0.904345	0.942507	121600	0.0235	0.52		0.9993	1.22548	0.00133978	0.00179216	0.00134696	00:00:00	79533	2021-08-11	2020-06-23	0	3.3051e+08	2021-02-28	0	0.85
2020-06-24	2.12189e+06	0		0	0.4	82360.8	188983	3.18283e+07	14211.6	1.3631		0	2020-06-24	0.0962989		0.4	0.0157505	0.00857672	0.136913	0.0013368	0.0013368	0.4	0.903701	0.942507	121900	0.023312	0.52		0.999289	1.23183	0.0013368	0.00178649	0.00134394	00:00:00	79880.9	2021-08-11	2020-06-24	0	3.30516e+08	2021-02-28	0	0.85
2020-06-25	2.13633e+06	0		0	0.4	83508.7	189434	3.2045e+07	14444.6	1.36991		0	2020-06-25	0.0969528		0.4	0.0158034	0.00859704	0.141208	0.00133383	0.00133383	0.4	0.903047	0.942507	122200	0.0231255	0.52		0.999276	1.2371	0.00133383	0.00178085	0.00134094	00:00:00	80231.6	2021-08-11	2020-06-25	0	3.30521e+08	2021-02-28	0	0.85
2020-06-26	2.15103e+06	0		0	0.4	84776.6	190503	3.22655e+07	14699.4	1.37591		0	2020-06-26	0.0976183		0.4	0.015876	0.00864542	0.144948	0.00133086	0.00133086	0.4	0.902382	0.942507	122500	0.0229405	0.52		0.999263	1.24159	0.00133086	0.00177523	0.00133794	00:00:00	80585.7	2021-08-11	2020-06-26	0	3.30527e+08	2021-02-28	0	0.85
2020-06-27	2.166e+06	0		0	0.4	86110	192194	3.249e+07	14967.9	1.38111		0	2020-06-27	0.098296		0.4	0.0159577	0.00872203	0.148167	0.00132791	0.00132791	0.4	0.901704	0.942507	122800	0.0227569	0.52		0.999249	1.24535	0.00132791	0.00176963	0.00133495	00:00:00	80943.4	2021-08-11	2020-06-27	0	3.30532e+08	2021-02-28	0	0.85
2020-06-28	2.18124e+06	0		0	0.4	87555.8	194490	3.27186e+07	15241.4	1.38561		0	2020-06-28	0.098986		0.4	0.0160566	0.00882608	0.150935	0.00132497	0.00132497	0.4	0.901014	0.942507	123100	0.0225749	0.52		0.999235	1.24845	0.00132497	0.00176406	0.00133197	00:00:00	81304.6	2021-08-11	2020-06-28	0	3.30537e+08	2021-02-28	0	0.85
2020-06-29	2.19677e+06	0		0	0.4	89094.2	196773	3.29515e+07	15529.3	1.38953		0	2020-06-29	0.0996891		0.4	0.0161686	0.00892955	0.153332	0.00132203	0.00132203	0.4	0.900311	0.942507	123400	0.0223943	0.52		0.99922	1.25101	0.00132203	0.00175852	0.001329	00:00:00	81669.8	2021-08-11	2020-06-29	0	3.30543e+08	2021-02-28	0	0.85
2020-06-30	2.2126e+06	0		0	0.4	90711.2	199445	3.3189e+07	15828.5	1.39294		0	2020-06-30	0.100406		0.4	0.0162907	0.00905066	0.155403	0.0013191	0.0013191	0.4	0.899594	0.942507	123700	0.0222151	0.52		0.999204	1.25308	0.0013191	0.00175299	0.00132604	00:00:00	82039	2021-08-11	2020-06-30	0	3.30548e+08	2021-02-28	0	0.85
2020-07-01	2.22873e+06	0		0	0.4	92403.7	202439	3.3431e+07	16137.2	1.39589		0	2020-07-01	0.101136		0.4	0.0164221	0.00918637	0.157192	0.00131618	0.00131618	0.4	0.898864	0.942507	124000	0.0220374	0.52		0.999188	1.25472	0.00131618	0.00174749	0.00132309	00:00:00	82412.4	2021-08-11	2020-07-01	0	3.30554e+08	2021-02-28	0	0.85
2020-07-02	2.24519e+06	0		0	0.4	94159.5	205664	3.36778e+07	16455.2	1.39847		0	2020-07-02	0.101881		0.4	0.0165602	0.00933256	0.158742	0.00131328	0.00131328	0.4	0.898119	0.942507	124300	0.0218611	0.52		0.999171	1.25599	0.00131328	0.00174201	0.00132015	00:00:00	82790.1	2021-08-11	2020-07-02	0	3.30559e+08	2021-02-28	0	0.85
2020-07-03	2.26197e+06	0		0	0.4	95972.4	209148	3.39296e+07	16780.7	1.4007		0	2020-07-03	0.102641		0.4	0.0167037	0.00949051	0.160084	0.00131037	0.00131037	0.4	0.897359	0.942507	124600	0.0216862	0.52		0.999154	1.25693	0.00131037	0.00173656	0.00131721	00:00:00	83172.2	2021-08-11	2020-07-03	0	3.30565e+08	2021-02-28	0	0.85
2020-07-04	2.27908e+06	0		0	0.4	97844	212830	3.41863e+07	17113	1.40264		0	2020-07-04	0.103416		0.4	0.0168526	0.0096574	0.161246	0.00130748	0.00130748	0.4	0.896584	0.942507	124900	0.0215127	0.52		0.999137	1.25759	0.00130748	0.00173112	0.00131429	00:00:00	83558.8	2021-08-11	2020-07-04	0	3.3057e+08	2021-02-28	0	0.85
2020-07-05	2.29654e+06	0		0	0.4	99767.3	216648	3.4448e+07	17452.7	1.40433		0	2020-07-05	0.104206		0.4	0.0170056	0.00983049	0.162254	0.0013046	0.0013046	0.4	0.895794	0.942507	125200	0.0213406	0.52		0.999119	1.25799	0.0013046	0.00172572	0.00131137	00:00:00	83949.9	2021-08-11	2020-07-05	0	3.30576e+08	2021-02-28	0	0.85
2020-07-06	2.31433e+06	0		0	0.4	101737	220651	3.4715e+07	17798.6	1.40579		0	2020-07-06	0.105012		0.4	0.0171615	0.010012	0.163127	0.00130173	0.00130173	0.4	0.894988	0.942507	125500	0.0211699	0.52		0.9991	1.25817	0.00130173	0.00172033	0.00130847	00:00:00	84345.5	2021-08-11	2020-07-06	0	3.30581e+08	2021-02-28	0	0.85
2020-07-07	2.33249e+06	0		0	0.4	103750	224810	3.49873e+07	18150.1	1.40707		0	2020-07-07	0.105834		0.4	0.0173197	0.0102005	0.163884	0.00129886	0.00129886	0.4	0.894166	0.942507	125800	0.0210005	0.52		0.999082	1.25815	0.00129886	0.00171496	0.00130557	00:00:00	84745.7	2021-08-11	2020-07-07	0	3.30586e+08	2021-02-28	0	0.85
2020-07-08	2.35099e+06	0		0	0.4	105802	229105	3.52649e+07	18506.8	1.40817		0	2020-07-08	0.106672		0.4	0.0174792	0.0103952	0.164541	0.001296	0.001296	0.4	0.893328	0.942507	126100	0.0208325	0.52		0.999063	1.25796	0.001296	0.00170962	0.00130268	00:00:00	85150.5	2021-08-11	2020-07-08	0	3.30592e+08	2021-02-28	0	0.85
2020-07-09	2.36986e+06	0		0	0.4	107889	233529	3.55479e+07	18868	1.40913		0	2020-07-09	0.107526		0.4	0.0176394	0.0105958	0.165111	0.00129316	0.00129316	0.4	0.892474	0.942507	126400	0.0206659	0.52		0.999044	1.25762	0.00129316	0.0017043	0.0012998	00:00:00	85560	2021-08-11	2020-07-09	0	3.30597e+08	2021-02-28	0	0.85
2020-07-10	2.38909e+06	0		0	0.4	110009	238063	3.58364e+07	19233.2	1.40997		0	2020-07-10	0.108397		0.4	0.0177999	0.0108013	0.165606	0.00129032	0.00129032	0.4	0.891603	0.942507	126700	0.0205006	0.52		0.999024	1.25713	0.00129032	0.001699	0.00129693	00:00:00	85974	2021-08-11	2020-07-10	0	3.30603e+08	2021-02-28	0	0.85
2020-07-11	2.4087e+06	0		0	0.4	112159	242697	3.61304e+07	19602.1	1.4107		0	2020-07-11	0.109285		0.4	0.01796	0.0110114	0.166035	0.00128748	0.00128748	0.4	0.890715	0.942507	127000	0.0203366	0.52		0.999005	1.25653	0.00128748	0.00169373	0.00129406	00:00:00	86392.5	2021-08-11	2020-07-11	0	3.30608e+08	2021-02-28	0	0.85
2020-07-12	2.42867e+06	0		0	0.4	114334	247429	3.643e+07	19974.1	1.41133		0	2020-07-12	0.110189		0.4	0.0181191	0.0112259	0.166408	0.00128466	0.00128466	0.4	0.889811	0.942507	127300	0.0201739	0.52		0.998985	1.25581	0.00128466	0.00168848	0.00129121	00:00:00	86815.6	2021-08-11	2020-07-12	0	3.30614e+08	2021-02-28	0	0.85
2020-07-13	2.44902e+06	0		0	0.4	116533	252249	3.67353e+07	20348.7	1.41187		0	2020-07-13	0.111111		0.4	0.0182767	0.0114444	0.166731	0.00128185	0.00128185	0.4	0.888889	0.942507	127600	0.0200125	0.52		0.998964	1.255	0.00128185	0.00168324	0.00128836	00:00:00	87243.2	2021-08-11	2020-07-13	0	3.30619e+08	2021-02-28	0	0.85
2020-07-14	2.46974e+06	0		0	0.4	118752	257146	3.70462e+07	20725.5	1.41235		0	2020-07-14	0.112049		0.4	0.0184324	0.0116664	0.167012	0.00127904	0.00127904	0.4	0.887951	0.942507	127900	0.0198524	0.52		0.998944	1.2541	0.00127904	0.00167803	0.00128552	00:00:00	87675.2	2021-08-11	2020-07-14	0	3.30624e+08	2021-02-28	0	0.85
2020-07-15	2.49085e+06	0		0	0.4	120988	262113	3.73627e+07	21104	1.41276		0	2020-07-15	0.113005		0.4	0.0185856	0.0118915	0.167256	0.00127624	0.00127624	0.4	0.886995	0.942507	128200	0.0196935	0.52		0.998924	1.25311	0.00127624	0.00167284	0.0012827	00:00:00	88111.6	2021-08-11	2020-07-15	0	3.3063e+08	2021-02-28	0	0.85
2020-07-16	2.51233e+06	0		0	0.4	123238	267141	3.7685e+07	21483.7	1.41312		0	2020-07-16	0.113977		0.4	0.018736	0.0121195	0.167468	0.00127345	0.00127345	0.4	0.886023	0.942507	128500	0.019536	0.52		0.998903	1.25206	0.00127345	0.00166768	0.00127987	00:00:00	88552.3	2021-08-11	2020-07-16	0	3.30635e+08	2021-02-28	0	0.85
2020-07-17	2.5342e+06	0		0	0.4	125500	272225	3.80129e+07	21864.2	1.41344		0	2020-07-17	0.114967		0.4	0.0188832	0.0123499	0.167652	0.00127067	0.00127067	0.4	0.885033	0.942507	128800	0.0193797	0.52		0.998883	1.25094	0.00127067	0.00166253	0.00127706	00:00:00	88997.2	2021-08-11	2020-07-17	0	3.30641e+08	2021-02-28	0	0.85
2020-07-18	2.55644e+06	0		0	0.4	127771	277357	3.83466e+07	22244.9	1.41371		0	2020-07-18	0.115975		0.4	0.0190268	0.0125825	0.167811	0.0012679	0.0012679	0.4	0.884025	0.942507	129100	0.0192247	0.52		0.998862	1.24975	0.0012679	0.0016574	0.00127426	00:00:00	89446.3	2021-08-11	2020-07-18	0	3.30646e+08	2021-02-28	0	0.85
2020-07-19	2.57907e+06	0		0	0.4	130048	282529	3.8686e+07	22625.4	1.41394		0	2020-07-19	0.116999		0.4	0.0191664	0.0128169	0.16795	0.00126513	0.00126513	0.4	0.883001	0.942507	129400	0.0190709	0.52		0.998841	1.24851	0.00126513	0.0016523	0.00127146	00:00:00	89899.3	2021-08-11	2020-07-19	0	3.30652e+08	2021-02-28	0	0.85
2020-07-20	2.60207e+06	0		0	0.4	132328	287736	3.90311e+07	23005.2	1.41415		0	2020-07-20	0.118041		0.4	0.0193016	0.0130529	0.168071	0.00126238	0.00126238	0.4	0.881959	0.942507	129700	0.0189183	0.52		0.99882	1.24722	0.00126238	0.00164722	0.00126868	00:00:00	90356.3	2021-08-11	2020-07-20	0	3.30657e+08	2021-02-28	0	0.85
2020-07-21	2.62545e+06	0		0	0.4	134607	292970	3.93818e+07	23383.8	1.41433		0	2020-07-21	0.1191		0.4	0.0194321	0.0132901	0.168175	0.00125963	0.00125963	0.4	0.8809	0.942507	130000	0.018767	0.52		0.998799	1.24588	0.00125963	0.00164215	0.0012659	00:00:00	90817.1	2021-08-11	2020-07-21	0	3.30662e+08	2021-02-28	0	0.85
2020-07-22	2.64922e+06	0		0	0.4	136884	298224	3.97382e+07	23760.8	1.41448		0	2020-07-22	0.120176		0.4	0.0195576	0.0135282	0.168266	0.00125689	0.00125689	0.4	0.879824	0.942507	130300	0.0186168	0.52		0.998779	1.24449	0.00125689	0.00163711	0.00126313	00:00:00	91281.6	2021-08-11	2020-07-22	0	3.30668e+08	2021-02-28	0	0.85
2020-07-23	2.67335e+06	0		0	0.4	139156	303491	4.01003e+07	24135.5	1.41461		0	2020-07-23	0.121269		0.4	0.0196777	0.013767	0.168345	0.00125416	0.00125416	0.4	0.878731	0.942507	130600	0.0184679	0.52		0.998758	1.24307	0.00125416	0.00163209	0.00126036	00:00:00	91749.6	2021-08-11	2020-07-23	0	3.30673e+08	2021-02-28	0	0.85
2020-07-24	2.69786e+06	0		0	0.4	141418	308766	4.04679e+07	24507.5	1.41473		0	2020-07-24	0.122378		0.4	0.0197922	0.014006	0.168414	0.00125143	0.00125143	0.4	0.877622	0.942507	130900	0.0183201	0.52		0.998737	1.2416	0.00125143	0.00162709	0.00125761	00:00:00	92221	2021-08-11	2020-07-24	0	3.30679e+08	2021-02-28	0	0.85
2020-07-25	2.72273e+06	0		0	0.4	143669	314040	4.0841e+07	24876.3	1.41483		0	2020-07-25	0.123505		0.4	0.0199008	0.014245	0.168473	0.00124872	0.00124872	0.4	0.876495	0.942507	131200	0.0181736	0.52		0.998717	1.24009	0.00124872	0.00162211	0.00125486	00:00:00	92695.7	2021-08-11	2020-07-25	0	3.30684e+08	2021-02-28	0	0.85
2020-07-26	2.74798e+06	0		0	0.4	145905	319307	4.12196e+07	25241.3	1.41492		0	2020-07-26	0.124648		0.4	0.0200031	0.0144837	0.168525	0.00124601	0.00124601	0.4	0.875352	0.942507	131500	0.0180282	0.52		0.998696	1.23855	0.00124601	0.00161715	0.00125213	00:00:00	93173.5	2021-08-11	2020-07-26	0	3.3069e+08	2021-02-28	0	0.85
2020-07-27	2.77358e+06	0		0	0.4	148123	324561	4.16037e+07	25602.2	1.415		0	2020-07-27	0.125807		0.4	0.0200989	0.0147217	0.16857	0.00124331	0.00124331	0.4	0.874193	0.942507	131800	0.017884	0.52		0.998676	1.23698	0.00124331	0.0016122	0.0012494	00:00:00	93654.3	2021-08-11	2020-07-27	0	3.30695e+08	2021-02-28	0	0.85
2020-07-28	2.79954e+06	0		0	0.4	150321	329793	4.1993e+07	25958.2	1.41506		0	2020-07-28	0.126982		0.4	0.020188	0.0149588	0.168609	0.00124062	0.00124062	0.4	0.873018	0.942507	132100	0.0177409	0.52		0.998656	1.23538	0.00124062	0.00160728	0.00124667	00:00:00	94137.8	2021-08-11	2020-07-28	0	3.30701e+08	2021-02-28	0	0.85
2020-07-29	2.82585e+06	0		0	0.4	152494	334998	4.23877e+07	26309	1.41512		0	2020-07-29	0.128173		0.4	0.02027	0.0151947	0.168643	0.00123793	0.00123793	0.4	0.871827	0.942507	132400	0.017599	0.52		0.998636	1.23374	0.00123793	0.00160238	0.00124396	00:00:00	94624	2021-08-11	2020-07-29	0	3.30706e+08	2021-02-28	0	0.85
2020-07-30	2.8525e+06	0		0	0.4	154641	340168	4.27875e+07	26653.9	1.41517		0	2020-07-30	0.12938		0.4	0.0203448	0.0154289	0.168673	0.00123526	0.00123526	0.4	0.87062	0.942507	132700	0.0174582	0.52		0.998616	1.23208	0.00123526	0.0015975	0.00124125	00:00:00	95112.6	2021-08-11	2020-07-30	0	3.30711e+08	2021-02-28	0	0.85
2020-07-31	2.87949e+06	0		0	0.4	156757	345297	4.31924e+07	26992.5	1.41522		0	2020-07-31	0.130602		0.4	0.020412	0.0156613	0.168698	0.00123259	0.00123259	0.4	0.869398	0.942507	133000	0.0173185	0.52		0.998596	1.23038	0.00123259	0.00159264	0.00123856	00:00:00	95603.4	2021-08-11	2020-07-31	0	3.30717e+08	2021-02-28	0	0.85
2020-08-01	2.90682e+06	0		0	0.4	158840	350376	4.36022e+07	27324.2	1.41525		0	2020-08-01	0.131839		0.4	0.0204716	0.0158914	0.168721	0.00122993	0.00122993	0.4	0.868161	0.942507	133300	0.01718	0.52		0.998577	1.22867	0.00122993	0.0015878	0.00123587	00:00:00	96096.3	2021-08-11			3.30722e+08	2021-02-28	0	0.85
2020-08-02	2.93446e+06	0		0	0.4	160886	355399	4.4017e+07	27648.5	1.41529		0	2020-08-02	0.133091		0.4	0.0205233	0.016119	0.16874	0.00122727	0.00122727	0.4	0.866909	0.942507	133600	0.0170425	0.52		0.998558	1.22692	0.00122727	0.00158297	0.00123318	00:00:00	96591.1	2021-08-11			3.30728e+08	2021-02-28	0	0.85
2020-08-03	2.96243e+06	0		0	0.4	162893	360359	4.44364e+07	27964.9	1.41531		0	2020-08-03	0.134357		0.4	0.0205668	0.0163436	0.168757	0.00122463	0.00122463	0.4	0.865643	0.942507	133900	0.0169062	0.52		0.998539	1.22516	0.00122463	0.00157817	0.00123051	00:00:00	97087.5	2021-08-11			3.30733e+08	2021-02-28	0	0.85
2020-08-04	2.9907e+06	0		0	0.4	164857	365248	4.48605e+07	28272.8	1.41534		0	2020-08-04	0.135637		0.4	0.0206021	0.0165651	0.168772	0.00122199	0.00122199	0.4	0.864363	0.942507	134200	0.0167709	0.52		0.998521	1.22337	0.00122199	0.00157338	0.00122784	00:00:00	97585.4	2021-08-11			3.30739e+08	2021-02-28	0	0.85
2020-08-05	3.01927e+06	0		0	0.4	166775	370059	4.52891e+07	28571.8	1.41536		0	2020-08-05	0.136931		0.4	0.020629	0.016783	0.168784	0.00121936	0.00121936	0.4	0.863069	0.942507	134500	0.0166368	0.52		0.998503	1.22155	0.00121936	0.00156862	0.00122518	00:00:00	98084.5	2021-08-11			3.30744e+08	2021-02-28	0	0.85
2020-08-06	3.04814e+06	0		0	0.4	168644	374785	4.5722e+07	28861.4	1.41538		0	2020-08-06	0.138238		0.4	0.0206472	0.0169971	0.168795	0.00121674	0.00121674	0.4	0.861762	0.942507	134800	0.0165037	0.52		0.998486	1.21972	0.00121674	0.00156387	0.00122253	00:00:00	98584.6	2021-08-11			3.30749e+08	2021-02-28	0	0.85
2020-08-07	3.07728e+06	0		0	0.4	170460	379418	4.61591e+07	29140.9	1.4154		0	2020-08-07	0.139557		0.4	0.0206567	0.0172069	0.168805	0.00121412	0.00121412	0.4	0.860443	0.942507	135100	0.0163716	0.52		0.998469	1.21787	0.00121412	0.00155914	0.00121989	00:00:00	99085.6	2021-08-11			3.30755e+08	2021-02-28	0	0.85
2020-08-08	3.10669e+06	0		0	0.4	172222	383952	4.66003e+07	29410	1.41541		0	2020-08-08	0.140888		0.4	0.0206573	0.0174122	0.168813	0.00121152	0.00121152	0.4	0.859112	0.942507	135400	0.0162407	0.52		0.998453	1.216	0.00121152	0.00155443	0.00121725	00:00:00	99587.1	2021-08-11			3.3076e+08	2021-02-28	0	0.85
2020-08-09	3.13635e+06	0		0	0.4	173925	388379	4.70453e+07	29668.2	1.41542		0	2020-08-09	0.142232		0.4	0.020649	0.0176127	0.16882	0.00120892	0.00120892	0.4	0.857768	0.942507	135700	0.0161108	0.52		0.998437	1.21411	0.00120892	0.00154974	0.00121463	00:00:00	100089	2021-08-11			3.30766e+08	2021-02-28	0	0.85
2020-08-10	3.16627e+06	0		0	0.4	175567	392692	4.7494e+07	29915.1	1.41543		0	2020-08-10	0.143586		0.4	0.0206316	0.017808	0.168827	0.00120632	0.00120632	0.4	0.856414	0.942507	136000	0.0159819	0.52		0.998421	1.2122	0.00120632	0.00154507	0.00121201	00:00:00	100591	2021-08-11			3.30771e+08	2021-02-28	0	0.85
2020-08-11	3.19642e+06	0		0	0.4	177146	396883	4.79463e+07	30150	1.41544		0	2020-08-11	0.144951		0.4	0.0206051	0.0179978	0.168832	0.00120374	0.00120374	0.4	0.855049	0.942507	136300	0.015854	0.52		0.998406	1.21027	0.00120374	0.00154042	0.00120939	00:00:00	101093	2021-08-11			3.30777e+08	2021-02-28	0	0.85
2020-08-12	3.22679e+06	0		0	0.4	178657	400947	4.84019e+07	30372.8	1.41545		0	2020-08-12	0.146326		0.4	0.0205693	0.0181818	0.168837	0.00120116	0.00120116	0.4	0.853674	0.942507	136600	0.0157272	0.52		0.998392	1.20833	0.00120116	0.00153578	0.00120679	00:00:00	101594	2021-08-11			3.30782e+08	2021-02-28	0	0.85
2020-08-13	3.25738e+06	0		0	0.4	180099	404876	4.88606e+07	30582.8	1.41546		0	2020-08-13	0.14771		0.4	0.0205244	0.0183596	0.168841	0.00119859	0.00119859	0.4	0.85229	0.942507	136900	0.0156014	0.52		0.998378	1.20638	0.00119859	0.00153116	0.00120419	00:00:00	102095	2021-08-11			3.30788e+08	2021-02-28	0	0.85
2020-08-14	3.28816e+06	0		0	0.4	181469	408663	4.93223e+07	30779.7	1.41546		0	2020-08-14	0.149103		0.4	0.0204702	0.0185311	0.168845	0.00119603	0.00119603	0.4	0.850897	0.942507	137200	0.0154765	0.52		0.998365	1.20441	0.00119603	0.00152657	0.0012016	00:00:00	102596	2021-08-11			3.30793e+08	2021-02-28	0	0.85
2020-08-15	3.31977e+06	0		0	0.4	183410	412949	4.97965e+07	31609.9	1.44503		0	2020-08-15	0.150534		0.5	0.0204789	0.0187251	0.185851	0.00119347	0.00119347	0.5	0.849466	0.942507	137500	0.0153527	0.4		0.998318	1.2275	0.00119347	0.00152198	0.00119902	00:00:00	103105	2021-08-11			3.30798e+08	2021-02-28	0	0.85
2020-08-16	3.35182e+06	0		0	0.4	185553	417358	5.02773e+07	32057.6	1.45243		0	2020-08-16	0.151985		0.5	0.0205077	0.0189247	0.189997	0.00119093	0.00119093	0.5	0.848015	0.942507	137800	0.0152299	0.4		0.998292	1.23168	0.00119093	0.00151742	0.00119644	00:00:00	103618	2021-08-11			3.30804e+08	2021-02-28	0	0.85
2020-08-17	3.38441e+06	0		0	0.4	187986	421976	5.07661e+07	32582.8	1.46167		0	2020-08-17	0.15346		0.5	0.0205655	0.0191338	0.195118	0.00118839	0.00118839	0.5	0.84654	0.942507	138100	0.0151081	0.4		0.998261	1.23736	0.00118839	0.00151288	0.00119388	00:00:00	104135	2021-08-11			3.30809e+08	2021-02-28	0	0.85
2020-08-18	3.41762e+06	0		0	0.4	190826	426916	5.12643e+07	33212.9	1.47322		0	2020-08-18	0.154964		0.5	0.0206644	0.0193575	0.201429	0.00118585	0.00118585	0.5	0.845036	0.942507	138400	0.0149872	0.4		0.998224	1.24492	0.00118585	0.00150835	0.00119132	00:00:00	104657	2021-08-11			3.30815e+08	2021-02-28	0	0.85
2020-08-19	3.45143e+06	0		0	0.4	194059	432160	5.17715e+07	33815.8	1.48027		0	2020-08-19	0.156494		0.5	0.0208013	0.0195949	0.205231	0.00118333	0.00118333	0.5	0.843506	0.942507	138700	0.0148673	0.4		0.998189	1.24861	0.00118333	0.00150384	0.00118876	00:00:00	105185	2021-08-11			3.3082e+08	2021-02-28	0	0.85
2020-08-20	3.48592e+06	0		0	0.4	197767	437787	5.22888e+07	34487.9	1.48723		0	2020-08-20	0.158056		0.5	0.0209838	0.0198497	0.208951	0.00118081	0.00118081	0.5	0.841944	0.942507	139000	0.0147484	0.4		0.998149	1.25216	0.00118081	0.00149935	0.00118622	00:00:00	105719	2021-08-11			3.30826e+08	2021-02-28	0	0.85
2020-08-21	3.52115e+06	0		0	0.4	201390	443878	5.28173e+07	35232.6	1.49362		0	2020-08-21	0.15965		0.5	0.0211515	0.0201256	0.212335	0.0011783	0.0011783	0.5	0.84035	0.942507	139300	0.0146304	0.4		0.998106	1.25516	0.0011783	0.00149487	0.00118368	00:00:00	106261	2021-08-11			3.30831e+08	2021-02-28	0	0.85
2020-08-22	3.55709e+06	0		0	0.4	205264	450400	5.33563e+07	35932.2	1.49872		0	2020-08-22	0.161277		0.5	0.02134	0.020421	0.215015	0.00117579	0.00117579	0.5	0.838723	0.942507	139600	0.0145133	0.4		0.998064	1.25701	0.00117579	0.00149041	0.00118115	00:00:00	106808	2021-08-11			3.30836e+08	2021-02-28	0	0.85
2020-08-23	3.59375e+06	0		0	0.4	209347	457397	5.39063e+07	36665.1	1.50333		0	2020-08-23	0.162937		0.5	0.0215441	0.0207379	0.217423	0.00117329	0.00117329	0.5	0.837063	0.942507	139900	0.0143972	0.4		0.998021	1.25838	0.00117329	0.00148597	0.00117862	00:00:00	107362	2021-08-11			3.30842e+08	2021-02-28	0	0.85
2020-08-24	3.63117e+06	0		0	0.4	213554	464903	5.44676e+07	37420.3	1.50735		0	2020-08-24	0.164631		0.5	0.0217546	0.0210778	0.219513	0.0011708	0.0011708	0.5	0.835369	0.942507	140200	0.0142821	0.4		0.997976	1.2592	0.0011708	0.00148155	0.00117611	00:00:00	107924	2021-08-11			3.30847e+08	2021-02-28	0	0.85
2020-08-25	3.66935e+06	0		0	0.4	217920	472934	5.50403e+07	38181.9	1.51079		0	2020-08-25	0.166359		0.5	0.0219747	0.0214416	0.221287	0.00116832	0.00116832	0.5	0.833641	0.942507	140500	0.0141678	0.4		0.997931	1.25946	0.00116832	0.00147714	0.0011736	00:00:00	108492	2021-08-11			3.30853e+08	2021-02-28	0	0.85
2020-08-26	3.70831e+06	0		0	0.4	222392	481521	5.56247e+07	38959.6	1.51381		0	2020-08-26	0.168123		0.5	0.0221988	0.0218306	0.222839	0.00116584	0.00116584	0.5	0.831877	0.942507	140800	0.0140545	0.4		0.997885	1.2593	0.00116584	0.00147275	0.00117109	00:00:00	109066	2021-08-11			3.30858e+08	2021-02-28	0	0.85
2020-08-27	3.74806e+06	0		0	0.4	226903	490682	5.62209e+07	39743.6	1.51643		0	2020-08-27	0.169922		0.5	0.0224201	0.0222455	0.224182	0.00116337	0.00116337	0.5	0.830078	0.942507	141100	0.013942	0.4		0.997837	1.25875	0.00116337	0.00146838	0.0011686	00:00:00	109648	2021-08-11			3.30864e+08	2021-02-28	0	0.85
2020-08-28	3.78858e+06	0		0	0.4	231493	500425	5.68287e+07	40522.5	1.51869		0	2020-08-28	0.171756		0.5	0.0226426	0.0226868	0.22534	0.00116091	0.00116091	0.5	0.828244	0.942507	141400	0.0138305	0.4		0.99779	1.25785	0.00116091	0.00146403	0.00116611	00:00:00	110237	2021-08-11			3.30869e+08	2021-02-28	0	0.85
2020-08-29	3.82988e+06	0		0	0.4	236132	510119	5.74483e+07	41304.6	1.52067		0	2020-08-29	0.173626		0.5	0.0228631	0.023126	0.226347	0.00115846	0.00115846	0.5	0.826374	0.942507	141700	0.0137198	0.4		0.997743	1.25664	0.00115846	0.00145969	0.00116363	00:00:00	110832	2021-08-11			3.30875e+08	2021-02-28	0	0.85
2020-08-30	3.87197e+06	0		0	0.4	240797	520147	5.80795e+07	42084.8	1.52239		0	2020-08-30	0.175531		0.5	0.0230793	0.0235801	0.227219	0.00115601	0.00115601	0.5	0.824469	0.942507	142000	0.0136101	0.4		0.997695	1.25516	0.00115601	0.00145537	0.00116116	00:00:00	111433	2021-08-11			3.3088e+08	2021-02-28	0	0.85
2020-08-31	3.91483e+06	0		0	0.4	245474	530423	5.87224e+07	42859.1	1.52388		0	2020-08-31	0.177471		0.5	0.0232902	0.0240456	0.227975	0.00115357	0.00115357	0.5	0.822529	0.942507	142300	0.0135012	0.4		0.997647	1.25343	0.00115357	0.00145106	0.00115869	00:00:00	112041	2021-08-11			3.30885e+08	2021-02-28	0	0.85
2020-09-01	3.96303e+06	0		0	0.4	254719	545415	5.94455e+07	48204.7	1.54861		0	2020-09-01	0.179653		0.5	0.0239236	0.0247248	0.301902	0.00115113	0.00115113	0.5	0.820347	0.942507	142600	0.0133932	0.4		0.997347	1.2704	0.00115113	0.00144677	0.00115623	00:00:00	112719	2021-08-11			3.30891e+08	2021-02-28	0	0.925
2020-09-02	4.01315e+06	0		0	0.4	265088	561711	6.01972e+07	50112.5	1.55559		0	2020-09-02	0.181922		0.5	0.0246464	0.0254632	0.305036	0.0011487	0.0011487	0.5	0.818078	0.942507	142900	0.0132861	0.4		0.997234	1.2726	0.0011487	0.0014425	0.00115377	00:00:00	113418	2021-08-11			3.30896e+08	2021-02-28	0	0.925
2020-09-03	4.06543e+06	0		0	0.4	276851	579509	6.09815e+07	52285.8	1.5639		0	2020-09-03	0.184289		0.5	0.0254807	0.0262695	0.308725	0.00114628	0.00114628	0.5	0.815711	0.942507	143200	0.0131798	0.4		0.997106	1.27569	0.00114628	0.00143824	0.00115133	00:00:00	114141	2021-08-11			3.30902e+08	2021-02-28	0	0.925
2020-09-04	4.12023e+06	0		0	0.4	290343	599073	6.18034e+07	54796.3	1.5739		0	2020-09-04	0.18677		0.5	0.0264532	0.0271559	0.31312	0.00114387	0.00114387	0.5	0.81323	0.942507	143500	0.0130743	0.4		0.996959	1.27994	0.00114387	0.001434	0.00114889	00:00:00	114894	2021-08-11			3.30907e+08	2021-02-28	0	0.925
2020-09-05	4.17775e+06	0		0	0.4	305780	620663	6.26662e+07	57522	1.58022		0	2020-09-05	0.189374		0.5	0.0275792	0.0281341	0.315868	0.00114146	0.00114146	0.5	0.810626	0.942507	143800	0.0129697	0.4		0.996798	1.28097	0.00114146	0.00142978	0.00114646	00:00:00	115677	2021-08-11			3.30913e+08	2021-02-28	0	0.925
2020-09-06	4.23837e+06	0		0	0.4	323543	644619	6.35756e+07	60621.7	1.58638		0	2020-09-06	0.192119		0.5	0.0288875	0.0292196	0.318524	0.00113906	0.00113906	0.5	0.807881	0.942507	144100	0.012866	0.4		0.996614	1.28161	0.00113906	0.00142557	0.00114403	00:00:00	116496	2021-08-11			3.30918e+08	2021-02-28	0	0.925
2020-09-07	4.30252e+06	0		0	0.4	339491	671351	6.45379e+07	64152.5	1.592		0	2020-09-07	0.195024		0.5	0.0300065	0.0304308	0.32093	0.00113667	0.00113667	0.5	0.804976	0.942507	144400	0.012763	0.4		0.996405	1.28152	0.00113667	0.00142138	0.00114161	00:00:00	117356	2021-08-11			3.30923e+08	2021-02-28	0	0.925
2020-09-08	4.36979e+06	0		0	0.4	356641	700433	6.55468e+07	67263.3	1.59653		0	2020-09-08	0.198069		0.5	0.0312054	0.0317485	0.322855	0.00113428	0.00113428	0.5	0.801931	0.942507	144700	0.0126609	0.4		0.996216	1.2803	0.00113428	0.0014172	0.0011392	00:00:00	118250	2021-08-11			3.30929e+08	2021-02-28	0	0.925
2020-09-09	4.44036e+06	0		0	0.4	374929	732047	6.66054e+07	70573.7	1.6006		0	2020-09-09	0.201265		0.5	0.0324757	0.0331809	0.324579	0.0011319	0.0011319	0.5	0.798735	0.942507	145000	0.0125597	0.4		0.996015	1.27846	0.0011319	0.00141304	0.00113679	00:00:00	119181	2021-08-11			3.30934e+08	2021-02-28	0	0.925
2020-09-10	4.51442e+06	0		0	0.4	394194	766364	6.77163e+07	74061.1	1.60416		0	2020-09-10	0.204618		0.5	0.0338013	0.0347358	0.326076	0.00112952	0.00112952	0.5	0.795382	0.942507	145300	0.0124592	0.4		0.995801	1.27592	0.00112952	0.0014089	0.0011344	00:00:00	120149	2021-08-11			3.3094e+08	2021-02-28	0	0.925
2020-09-11	4.59211e+06	0		0	0.4	414359	803528	6.88816e+07	77686.5	1.6072		0	2020-09-11	0.208136		0.5	0.0351735	0.0364197	0.327351	0.00112716	0.00112716	0.5	0.791864	0.942507	145600	0.0123595	0.4		0.995577	1.27268	0.00112716	0.00140477	0.001132	00:00:00	121158	2021-08-11			3.30945e+08	2021-02-28	0	0.925
2020-09-12	4.67354e+06	0		0	0.4	435171	843658	7.01031e+07	81434.3	1.60987		0	2020-09-12	0.211824		0.5	0.0365694	0.0382379	0.328465	0.0011248	0.0011248	0.5	0.788176	0.942507	145900	0.0122606	0.4		0.995343	1.26886	0.0011248	0.00140065	0.00112962	00:00:00	122206	2021-08-11			3.30951e+08	2021-02-28	0	0.925
2020-09-13	4.75879e+06	0		0	0.4	456268	886822	7.13819e+07	85248.8	1.61218		0	2020-09-13	0.215684		0.5	0.0379574	0.0401936	0.32943	0.00112244	0.00112244	0.5	0.784316	0.942507	146200	0.0121625	0.4		0.995102	1.26446	0.00112244	0.00139656	0.00112724	00:00:00	123295	2021-08-11			3.30956e+08	2021-02-28	0	0.925
2020-09-14	4.84785e+06	0		0	0.4	478059	933017	7.27177e+07	89054.4	1.61419		0	2020-09-14	0.219716		0.5	0.0393713	0.0422867	0.330263	0.00112009	0.00112009	0.5	0.780284	0.942507	146500	0.0120652	0.4		0.994858	1.25952	0.00112009	0.00139247	0.00112487	00:00:00	124423	2021-08-11			3.30962e+08	2021-02-28	0	0.925
2020-09-15	4.94077e+06	0		0	0.4	500413	977741	7.41116e+07	92928.3	1.61593		0	2020-09-15	0.223924		0.5	0.0407991	0.0443129	0.330987	0.00111775	0.00111775	0.5	0.776076	0.942507	146800	0.0119687	0.4		0.994607	1.25409	0.00111775	0.0013884	0.0011225	00:00:00	125591	2021-08-11			3.30967e+08	2021-02-28	0	0.925
2020-09-16	5.03761e+06	0		0	0.4	523192	1.02447e+06	7.55642e+07	96840	1.61745		0	2020-09-16	0.22831		0.5	0.0422287	0.0464299	0.331615	0.00111542	0.00111542	0.5	0.77169	0.942507	147100	0.011873	0.4		0.99435	1.24817	0.00111542	0.00138435	0.00112014	00:00:00	126798	2021-08-11			3.30972e+08	2021-02-28	0	0.925
2020-09-17	5.13837e+06	0		0	0.4	546264	1.07294e+06	7.70756e+07	100758	1.61877		0	2020-09-17	0.232872		0.5	0.0436492	0.048626	0.332159	0.00111309	0.00111309	0.5	0.767128	0.942507	147400	0.011778	0.4		0.994087	1.2418	0.00111309	0.00138032	0.00111779	00:00:00	128044	2021-08-11			3.30978e+08	2021-02-28	0	0.925
2020-09-18	5.24303e+06	0		0	0.4	569483	1.1228e+06	7.86454e+07	104653	1.61991		0	2020-09-18	0.237611		0.5	0.0454121	0.0508846	0.332631	0.00111077	0.00111077	0.5	0.762389	0.942507	147700	0.011778	0.4		0.993822	1.235	0.00111077	0.00137629	0.00111545	00:00:00	129338	2021-08-11			3.30983e+08	2021-02-28	0	0.925
2020-09-19	5.35152e+06	0		0	0.4	592728	1.17377e+06	8.02728e+07	108494	1.62091		0	2020-09-19	0.242524		0.5	0.0471699	0.0531938	0.333041	0.00110845	0.00110845	0.5	0.757476	0.942507	148000	0.011778	0.4		0.993556	1.2278	0.00110845	0.00137229	0.00111311	00:00:00	130680	2021-08-11			3.30989e+08	2021-02-28	0	0.925
2020-09-20	5.46377e+06	0		0	0.4	615929	1.2254e+06	8.19566e+07	112255	1.62177		0	2020-09-20	0.247607		0.5	0.0489171	0.0555329	0.333396	0.00110614	0.00110614	0.5	0.752393	0.942507	148300	0.011778	0.4		0.993289	1.22021	0.00110614	0.00136829	0.00111077	00:00:00	132068	2021-08-11			3.30994e+08	2021-02-28	0	0.925
2020-09-21	5.57969e+06	0		0	0.4	638920	1.27717e+06	8.36954e+07	115920	1.62253		0	2020-09-21	0.252857		0.5	0.0506406	0.0578779	0.333705	0.00110384	0.00110384	0.5	0.747143	0.942507	148600	0.011778	0.4		0.993023	1.21226	0.00110384	0.00136432	0.00110845	00:00:00	133502	2021-08-11			3.31e+08	2021-02-28	0	0.925
2020-09-22	5.69915e+06	0		0	0.4	661536	1.32936e+06	8.54873e+07	119456	1.62318		0	2020-09-22	0.258266		0.5	0.0523275	0.0602421	0.333973	0.00110154	0.00110154	0.5	0.741734	0.942507	148900	0.011778	0.4		0.99276	1.20397	0.00110154	0.00136035	0.00110613	00:00:00	134979	2021-08-11			3.31005e+08	2021-02-28	0	0.925
2020-09-23	5.82198e+06	0		0	0.4	683610	1.38162e+06	8.73297e+07	122832	1.62375		0	2020-09-23	0.263828		0.5	0.0539648	0.0626092	0.334205	0.00109925	0.00109925	0.5	0.736172	0.942507	149200	0.011778	0.4		0.992501	1.19536	0.00109925	0.00135641	0.00110381	00:00:00	136498	2021-08-11			3.31011e+08	2021-02-28	0	0.925
2020-09-24	5.948e+06	0		0	0.4	704973	1.43358e+06	8.922e+07	126017	1.62424		0	2020-09-24	0.269534		0.5	0.0555395	0.0649626	0.334407	0.00109697	0.00109697	0.5	0.730466	0.942507	149500	0.011778	0.4		0.992249	1.18645	0.00109697	0.00135247	0.00110151	00:00:00	138057	2021-08-11			3.31016e+08	2021-02-28	0	0.925
2020-09-25	6.07698e+06	0		0	0.4	725460	1.48487e+06	9.11547e+07	128981	1.62467		0	2020-09-25	0.275374		0.5	0.0570391	0.0672859	0.334583	0.00109469	0.00109469	0.5	0.724626	0.942507	149800	0.011778	0.4		0.992005	1.17728	0.00109469	0.00134855	0.00109921	00:00:00	139652	2021-08-11			3.31021e+08	2021-02-28	0	0.925
2020-09-26	6.20868e+06	0		0	0.4	744904	1.53514e+06	9.31302e+07	131699	1.62504		0	2020-09-26	0.281337		0.5	0.0584508	0.0695625	0.334735	0.00109242	0.00109242	0.5	0.718663	0.942507	150100	0.011778	0.4		0.991771	1.16785	0.00109242	0.00134465	0.00109691	00:00:00	141280	2021-08-11			3.31027e+08	2021-02-28	0	0.925
2020-09-27	6.34282e+06	0		0	0.4	763127	1.58403e+06	9.51423e+07	134142	1.62536		0	2020-09-27	0.287411		0.5	0.0597613	0.0717768	0.334867	0.00109015	0.00109015	0.5	0.712589	0.942507	150400	0.011778	0.4		0.991549	1.15821	0.00109015	0.00134076	0.00109462	00:00:00	142939	2021-08-11			3.31032e+08	2021-02-28	0	0.925
2020-09-28	6.47911e+06	0		0	0.4	779957	1.63126e+06	9.71866e+07	136286	1.62564		0	2020-09-28	0.293582		0.5	0.0609577	0.0739158	0.334982	0.00108789	0.00108789	0.5	0.706418	0.942507	150700	0.011778	0.4		0.99134	1.14838	0.00108789	0.00133688	0.00109234	00:00:00	144625	2021-08-11			3.31038e+08	2021-02-28	0	0.925
2020-09-29	6.61721e+06	0		0	0.4	795232	1.67644e+06	9.92582e+07	138106	1.62589		0	2020-09-29	0.299835		0.5	0.062028	0.0759617	0.335082	0.00108564	0.00108564	0.5	0.700165	0.942507	151000	0.011778	0.4		0.991148	1.13839	0.00108564	0.00133302	0.00109007	00:00:00	146333	2021-08-11			3.31043e+08	2021-02-28	0	0.925
2020-09-30	6.7568e+06	0		0	0.4	808798	1.71918e+06	1.01352e+08	139583	1.6261		0	2020-09-30	0.306154		0.5	0.062961	0.0778971	0.335169	0.00108339	0.00108339	0.5	0.693846	0.942507	151300	0.011778	0.4		0.990974	1.12826	0.00108339	0.00132917	0.0010878	00:00:00	148059	2021-08-11			3.31049e+08	2021-02-28	0	0.925
2020-10-01	6.91109e+06	0		0	0.4	834115	1.77272e+06	1.03666e+08	154299	1.64972		0	2020-10-01	0.31314		0.5	0.0648034	0.0803217	0.393837	0.00108115	0.00108115	0.5	0.68686	0.942507	151600	0.011778	0.4		0.989931	1.13313	0.00108115	0.00132534	0.00108553	00:00:00	149967	2021-08-11			3.31054e+08	2021-02-28	0	1
2020-10-02	7.0692e+06	0		0	0.4	860517	1.82617e+06	1.06038e+08	158101	1.65574		0	2020-10-02	0.320299		0.5	0.0667226	0.0827421	0.39604	0.00107892	0.00107892	0.5	0.679701	0.942507	151900	0.011778	0.4		0.989578	1.12541	0.00107892	0.00132152	0.00108328	00:00:00	151922	2021-08-11			3.31059e+08	2021-02-28	0	1
2020-10-03	7.23133e+06	0		0	0.4	888508	1.87981e+06	1.0847e+08	162133	1.6632		0	2020-10-03	0.327639		0.5	0.0687571	0.085171	0.398751	0.00107669	0.00107669	0.5	0.672361	0.942507	152200	0.011778	0.4		0.9892	1.11827	0.00107669	0.00131772	0.00108103	00:00:00	153927	2021-08-11			3.31065e+08	2021-02-28	0	1
2020-10-04	7.39785e+06	0		0	0.4	918744	1.93408e+06	1.10968e+08	166522	1.67248		0	2020-10-04	0.335179		0.5	0.0709571	0.0876283	0.402085	0.00107447	0.00107447	0.5	0.664821	0.942507	152500	0.011778	0.4		0.988787	1.1119	0.00107447	0.00131393	0.00107878	00:00:00	155987	2021-08-11			3.3107e+08	2021-02-28	0	1
2020-10-05	7.56869e+06	0		0	0.4	951476	1.98899e+06	1.1353e+08	170838	1.67817		0	2020-10-05	0.342913		0.5	0.0733407	0.0901151	0.404112	0.00107225	0.00107225	0.5	0.657087	0.942507	152800	0.011778	0.4		0.988366	1.1027	0.00107225	0.00131015	0.00107654	00:00:00	158099	2021-08-11			3.31076e+08	2021-02-28	0	1
2020-10-06	7.74414e+06	0		0	0.4	987343	2.04499e+06	1.16162e+08	175450	1.68378		0	2020-10-06	0.350857		0.5	0.0759563	0.0926505	0.406097	0.00107004	0.00107004	0.5	0.649143	0.942507	153100	0.011778	0.4		0.987911	1.09301	0.00107004	0.00130638	0.00107431	00:00:00	160269	2021-08-11			3.31081e+08	2021-02-28	0	1
2020-10-07	7.92455e+06	0		0	0.4	1.01346e+06	2.10257e+06	1.18868e+08	180412	1.68892		0	2020-10-07	0.359025		0.5	0.0778128	0.0952577	0.407905	0.00106784	0.00106784	0.5	0.640975	0.942507	153400	0.011778	0.4		0.987417	1.08256	0.00106784	0.00130263	0.00107208	00:00:00	162500	2021-08-11			3.31087e+08	2021-02-28	0	1
2020-10-08	8.10785e+06	0		0	0.4	1.03865e+06	2.15985e+06	1.21618e+08	183299	1.69303		0	2020-10-08	0.367323		0.5	0.0795918	0.0978512	0.409343	0.00106564	0.00106564	0.5	0.632677	0.942507	153700	0.011778	0.4		0.987054	1.07114	0.00106564	0.0012989	0.00106986	00:00:00	164767	2021-08-11			3.31092e+08	2021-02-28	0	1
2020-10-09	8.29368e+06	0		0	0.4	1.06235e+06	2.2167e+06	1.24405e+08	185831	1.69674		0	2020-10-09	0.375736		0.5	0.0812492	0.100425	0.410636	0.00106344	0.00106344	0.5	0.624264	0.942507	154000	0.011778	0.4		0.986703	1.05922	0.00106344	0.00129518	0.00106765	00:00:00	167065	2021-08-11			3.31098e+08	2021-02-28	0	1
2020-10-10	8.48158e+06	0		0	0.4	1.08373e+06	2.2729e+06	1.27224e+08	187902	1.69999		0	2020-10-10	0.384242		0.5	0.0827231	0.10297	0.41176	0.00106126	0.00106126	0.5	0.615758	0.942507	154300	0.011778	0.4		0.986374	1.04678	0.00106126	0.00129147	0.00106544	00:00:00	169389	2021-08-11			3.31103e+08	2021-02-28	0	1
2020-10-11	8.67096e+06	0		0	0.4	1.10227e+06	2.32814e+06	1.30064e+08	189379	1.70275		0	2020-10-11	0.392815		0.5	0.0839752	0.10547	0.412716	0.00105908	0.00105908	0.5	0.607185	0.942507	154600	0.011778	0.4		0.986077	1.03389	0.00105908	0.00128777	0.00106324	00:00:00	171731	2021-08-11			3.31108e+08	2021-02-28	0	1
2020-10-12	8.86117e+06	0		0	0.4	1.11703e+06	2.38206e+06	1.32918e+08	190209	1.70518		0	2020-10-12	0.401426		0.5	0.0849347	0.107911	0.413553	0.0010569	0.0010569	0.5	0.598574	0.942507	154900	0.011778	0.4		0.985819	1.02068	0.0010569	0.00128409	0.00106104	00:00:00	174083	2021-08-11			3.31114e+08	2021-02-28	0	1
2020-10-13	9.05143e+06	0		0	0.4	1.12688e+06	2.43422e+06	1.35771e+08	190257	1.70729		0	2020-10-13	0.410038		0.5	0.0855177	0.110272	0.414278	0.00105473	0.00105473	0.5	0.589962	0.942507	155200	0.011778	0.4		0.985612	1.00724	0.00105473	0.00128042	0.00105885	00:00:00	176436	2021-08-11			3.31119e+08	2021-02-28	0	1
2020-10-14	9.2408e+06	0		0	0.4	1.13295e+06	2.48401e+06	1.38612e+08	189375	1.70912		0	2020-10-14	0.41861		0.5	0.0858129	0.112526	0.414904	0.00105257	0.00105257	0.5	0.58139	0.942507	155500	0.011778	0.4		0.98547	0.993667	0.00105257	0.00127676	0.00105667	00:00:00	178778	2021-08-11			3.31125e+08	2021-02-28	0	1
2020-10-15	9.42861e+06	0		0	0.4	1.13493e+06	2.51751e+06	1.41429e+08	187804	1.71071		0	2020-10-15	0.42711		0.5	0.0857969	0.114042	0.415449	0.00105041	0.00105041	0.5	0.57289	0.942507	155800	0.011778	0.4		0.985379	0.98005	0.00105041	0.00127312	0.00105449	00:00:00	181101	2021-08-11			3.3113e+08	2021-02-28	0	1
2020-10-16	9.61414e+06	0		0	0.4	1.13256e+06	2.54494e+06	1.44212e+08	185531	1.7121		0	2020-10-16	0.435508		0.5	0.0854531	0.115282	0.415921	0.00104826	0.00104826	0.5	0.564492	0.942507	156100	0.011778	0.4		0.985342	0.966465	0.00104826	0.00126949	0.00105232	00:00:00	183395	2021-08-11			3.31136e+08	2021-02-28	0	1
2020-10-17	9.7967e+06	0		0	0.4	1.12573e+06	2.56537e+06	1.4695e+08	182557	1.7133		0	2020-10-17	0.44377		0.5	0.0847754	0.116206	0.41633	0.00104611	0.00104611	0.5	0.55623	0.942507	156400	0.011778	0.4		0.985363	0.952987	0.00104611	0.00126587	0.00105015	00:00:00	185653	2021-08-11			3.31141e+08	2021-02-28	0	1
2020-10-18	9.97561e+06	0		0	0.4	1.11444e+06	2.57776e+06	1.49634e+08	178910	1.71434		0	2020-10-18	0.451867		0.5	0.0837639	0.116765	0.416685	0.00104397	0.00104397	0.5	0.548133	0.942507	156700	0.011778	0.4		0.985443	0.939687	0.00104397	0.00126227	0.00104799	00:00:00	187865	2021-08-11			3.31147e+08	2021-02-28	0	1
2020-10-19	1.01502e+07	0		0	0.4	1.09881e+06	2.58155e+06	1.52254e+08	174629	1.71525		0	2020-10-19	0.459769		0.5	0.0824314	0.116935	0.416993	0.00104184	0.00104184	0.5	0.540231	0.942507	157000	0.011778	0.4		0.985583	0.926629	0.00104184	0.00125868	0.00104583	00:00:00	190025	2021-08-11			3.31152e+08	2021-02-28	0	1
2020-10-20	1.032e+07	0		0	0.4	1.07921e+06	2.57587e+06	1.548e+08	169776	1.71603		0	2020-10-20	0.467452		0.5	0.0808067	0.116676	0.417261	0.00103971	0.00103971	0.5	0.532548	0.942507	157300	0.011778	0.4		0.985779	0.913871	0.00103971	0.0012551	0.00104368	00:00:00	192125	2021-08-11			3.31157e+08	2021-02-28	0	1
2020-10-21	1.04845e+07	0		0	0.4	1.05584e+06	2.5599e+06	1.57267e+08	164442	1.71672		0	2020-10-21	0.474893		0.5	0.0789069	0.115951	0.417493	0.00103759	0.00103759	0.5	0.525107	0.942507	157600	0.011778	0.4		0.986028	0.901462	0.00103759	0.00125153	0.00104154	00:00:00	194158	2021-08-11			3.31163e+08	2021-02-28	0	1
2020-10-22	1.06431e+07	0		0	0.4	1.029e+06	2.53529e+06	1.59647e+08	158689	1.71731		0	2020-10-22	0.482072		0.5	0.0767548	0.114834	0.417695	0.00103547	0.00103547	0.5	0.517928	0.942507	157900	0.011778	0.4		0.986327	0.889444	0.00103547	0.00124798	0.0010394	00:00:00	196121	2021-08-11			3.31168e+08	2021-02-28	0	1
2020-10-23	1.07957e+07	0		0	0.4	999031	2.50205e+06	1.61936e+08	152586	1.71783		0	2020-10-23	0.488976		0.5	0.0743779	0.113326	0.41787	0.00103336	0.00103336	0.5	0.511024	0.942507	158200	0.011778	0.4		0.986671	0.877853	0.00103336	0.00124444	0.00103727	00:00:00	198008	2021-08-11			3.31174e+08	2021-02-28	0	1
2020-10-24	1.09419e+07	0		0	0.4	966326	2.46035e+06	1.64129e+08	146205	1.71828		0	2020-10-24	0.49559		0.5	0.0718068	0.111436	0.418022	0.00103125	0.00103125	0.5	0.50441	0.942507	158500	0.011778	0.4		0.987057	0.866718	0.00103125	0.00124091	0.00103514	00:00:00	199816	2021-08-11			3.31179e+08	2021-02-28	0	1
2020-10-25	1.10816e+07	0		0	0.4	931318	2.41059e+06	1.66223e+08	139620	1.71867		0	2020-10-25	0.501905		0.5	0.0690746	0.10918	0.418154	0.00102915	0.00102915	0.5	0.498095	0.942507	158800	0.011778	0.4		0.987479	0.85606	0.00102915	0.0012374	0.00103302	00:00:00	201543	2021-08-11			3.31185e+08	2021-02-28	0	1
2020-10-26	1.12145e+07	0		0	0.4	894446	2.35329e+06	1.68217e+08	132904	1.71901		0	2020-10-26	0.507916		0.5	0.0662147	0.106583	0.418269	0.00102705	0.00102705	0.5	0.492084	0.942507	159100	0.011778	0.4		0.987932	0.845896	0.00102705	0.0012339	0.0010309	00:00:00	203186	2021-08-11			3.3119e+08	2021-02-28	0	1
2020-10-27	1.13406e+07	0		0	0.4	856127	2.28915e+06	1.70109e+08	126123	1.7193		0	2020-10-27	0.51362		0.5	0.0632588	0.103677	0.418369	0.00102496	0.00102496	0.5	0.48638	0.942507	159400	0.011778	0.4		0.988409	0.836234	0.00102496	0.00123041	0.00102879	00:00:00	204746	2021-08-11			3.31196e+08	2021-02-28	0	1
2020-10-28	1.14599e+07	0		0	0.4	816776	2.21911e+06	1.71899e+08	119338	1.71956		0	2020-10-28	0.519016		0.5	0.0602378	0.100503	0.418455	0.00102288	0.00102288	0.5	0.480984	0.942507	159700	0.011778	0.4		0.988905	0.827079	0.00102288	0.00122693	0.00102669	00:00:00	206222	2021-08-11			3.31201e+08	2021-02-28	0	1
2020-10-29	1.15725e+07	0		0	0.4	776795	2.14391e+06	1.73588e+08	112604	1.71978		0	2020-10-29	0.524108		0.5	0.0571817	0.0970957	0.41853	0.0010208	0.0010208	0.5	0.475892	0.942507	160000	0.011778	0.4		0.989415	0.81843	0.0010208	0.00122347	0.00102459	00:00:00	207614	2021-08-11			3.31206e+08	2021-02-28	0	1
2020-10-30	1.16785e+07	0		0	0.4	736560	2.06435e+06	1.75177e+08	105971	1.71997		0	2020-10-30	0.528898		0.5	0.0541185	0.0934909	0.418596	0.00101873	0.00101873	0.5	0.471102	0.942507	160300	0.011778	0.4		0.989933	0.810283	0.00101873	0.00122001	0.0010225	00:00:00	208925	2021-08-11			3.31212e+08	2021-02-28	0	1
2020-10-31	1.1778e+07	0		0	0.4	696420	1.98128e+06	1.7667e+08	99480	1.72014		0	2020-10-31	0.533395		0.5	0.0510736	0.089727	0.418652	0.00101666	0.00101666	0.5	0.466605	0.942507	160600	0.011778	0.4		0.990455	0.802627	0.00101666	0.00121657	0.00102041	00:00:00	210155	2021-08-11			3.31217e+08	2021-02-28	0	1
2020-11-01	1.18775e+07	0		0	0.4	663011	1.90186e+06	1.78162e+08	99495.2	1.8371		0	2020-11-01	0.537892		0.8	0.0485328	0.0861291	0.455664	0.0010146	0.0010146	0.8	0.462108	0.942507	160900	0.011778	0.04		0.990362	0.848939	0.0010146	0.00121314	0.00101833	00:00:00	211386	2021-08-11			3.31223e+08	2021-02-28	0	1
2020-11-02	1.19728e+07	0		0	0.4	632195	1.82254e+06	1.79592e+08	95307	1.86643		0	2020-11-02	0.542199		0.8	0.046191	0.0825355	0.464217	0.00101254	0.00101254	0.8	0.457801	0.942507	161200	0.011778	0.04		0.990679	0.854453	0.00101254	0.00120973	0.00101625	00:00:00	212564	2021-08-11			3.31228e+08	2021-02-28	0	1
2020-11-03	1.20646e+07	0		0	0.4	604653	1.74456e+06	1.80969e+08	91796.3	1.90304		0	2020-11-03	0.546347		0.8	0.0440966	0.0790028	0.474526	0.00101049	0.00101049	0.8	0.453653	0.942507	161500	0.011778	0.04		0.990939	0.863321	0.00101049	0.00120632	0.00101418	00:00:00	213699	2021-08-11			3.31234e+08	2021-02-28	0	1
2020-11-04	1.21537e+07	0		0	0.4	581141	1.66921e+06	1.82305e+08	89092.1	1.94877		0	2020-11-04	0.550373		0.8	0.0423033	0.0755894	0.486855	0.00100844	0.00100844	0.8	0.449627	0.942507	161800	0.011778	0.04		0.991126	0.876219	0.00100844	0.00120293	0.00101212	00:00:00	214801	2021-08-11			3.31239e+08	2021-02-28	0	1
2020-11-05	1.22397e+07	0		0	0.4	561254	1.59661e+06	1.83596e+08	86083.6	1.97669		0	2020-11-05	0.554262		0.8	0.04078	0.0723003	0.494103	0.0010064	0.0010064	0.8	0.445738	0.942507	162100	0.011778	0.04		0.99135	0.881084	0.0010064	0.00119955	0.00101006	00:00:00	215866	2021-08-11			3.31245e+08	2021-02-28	0	1
2020-11-06	1.23233e+07	0		0	0.4	545342	1.52759e+06	1.8485e+08	83568	2.00425		0	2020-11-06	0.558037		0.8	0.0395507	0.0691738	0.50106	0.00100437	0.00100437	0.8	0.441963	0.942507	162400	0.011778	0.04		0.991531	0.885804	0.00100437	0.00119618	0.001008	00:00:00	216899	2021-08-11			3.3125e+08	2021-02-28	0	1
2020-11-07	1.24048e+07	0		0	0.4	527374	1.46291e+06	1.86073e+08	81527.5	2.02955		0	2020-11-07	0.561719		0.8	0.0381771	0.0662439	0.50728	0.00100234	0.00100234	0.8	0.438281	0.942507	162700	0.011778	0.04		0.991668	0.889513	0.00100234	0.00119282	0.00100595	00:00:00	217908	2021-08-11			3.31255e+08	2021-02-28	0	1
2020-11-08	1.24838e+07	0		0	0.4	511030	1.40225e+06	1.87257e+08	78962.4	2.04975		0	2020-11-08	0.565286		0.8	0.0369258	0.0634961	0.512135	0.00100031	0.00100031	0.8	0.434714	0.942507	163000	0.011778	0.04		0.991863	0.891054	0.00100031	0.00118948	0.00100391	00:00:00	218884	2021-08-11			3.31261e+08	2021-02-28	0	1
2020-11-09	1.25604e+07	0		0	0.4	495802	1.34592e+06	1.88406e+08	76568.8	2.06801		0	2020-11-09	0.568744		0.8	0.0357597	0.0609442	0.516444	0.000998294	0.000998294	0.8	0.431256	0.942507	163300	0.011778	0.04		0.992046	0.891844	0.000998294	0.00118614	0.00100187	00:00:00	219831	2021-08-11			3.31266e+08	2021-02-28	0	1
2020-11-10	1.26346e+07	0		0	0.4	480975	1.29406e+06	1.8952e+08	74264.4	2.08395		0	2020-11-10	0.572097		0.8	0.0346266	0.058595	0.520143	0.00099628	0.00099628	0.8	0.427903	0.942507	163600	0.011778	0.04		0.992224	0.89173	0.00099628	0.00118282	0.000999837	00:00:00	220749	2021-08-11			3.31272e+08	2021-02-28	0	1
2020-11-11	1.27066e+07	0		0	0.4	466841	1.24667e+06	1.90599e+08	71949.8	2.09755		0	2020-11-11	0.575345		0.8	0.0335476	0.0564483	0.523254	0.000994271	0.000994271	0.8	0.424655	0.942507	163900	0.011778	0.04		0.992408	0.890736	0.000994271	0.00117951	0.000997809	00:00:00	221639	2021-08-11			3.31277e+08	2021-02-28	0	1
2020-11-12	1.27763e+07	0		0	0.4	452973	1.20377e+06	1.91644e+08	69700.2	2.1095		0	2020-11-12	0.578492		0.8	0.0324915	0.0545048	0.525955	0.000992267	0.000992267	0.8	0.421508	0.942507	164200	0.011778	0.04		0.992591	0.889174	0.000992267	0.00117621	0.000995787	00:00:00	222501	2021-08-11			3.31283e+08	2021-02-28	0	1
2020-11-13	1.28437e+07	0		0	0.4	438904	1.16525e+06	1.92656e+08	67458.7	2.11988		0	2020-11-13	0.581537		0.8	0.031425	0.0527601	0.528275	0.000990269	0.000990269	0.8	0.418463	0.942507	164500	0.011778	0.04		0.992776	0.887091	0.000990269	0.00117292	0.00099377	00:00:00	223335	2021-08-11			3.31288e+08	2021-02-28	0	1
2020-11-14	1.29089e+07	0		0	0.4	425108	1.13094e+06	1.93634e+08	65166.3	2.12886		0	2020-11-14	0.584478		0.8	0.0303818	0.0512057	0.530265	0.000988276	0.000988276	0.8	0.415522	0.942507	164800	0.011778	0.04		0.992972	0.884589	0.000988276	0.00116965	0.000991758	00:00:00	224141	2021-08-11			3.31294e+08	2021-02-28	0	1
2020-11-15	1.29718e+07	0		0	0.4	411444	1.09435e+06	1.94577e+08	62904.7	2.13669		0	2020-11-15	0.587316		0.8	0.0293518	0.0495481	0.531986	0.000986287	0.000986287	0.8	0.412684	0.942507	165100	0.011778	0.04		0.993169	0.881776	0.000986287	0.00116638	0.000989751	00:00:00	224919	2021-08-11			3.31299e+08	2021-02-28	0	1
2020-11-16	1.30325e+07	0		0	0.4	397839	1.0597e+06	1.95487e+08	60659.2	2.14348		0	2020-11-16	0.590053		0.8	0.0283298	0.0479786	0.533469	0.000984305	0.000984305	0.8	0.409947	0.942507	165400	0.011778	0.04		0.993368	0.878714	0.000984305	0.00116313	0.00098775	00:00:00	225669	2021-08-11			3.31304e+08	2021-02-28	0	1
2020-11-17	1.30909e+07	0		0	0.4	384314	1.02633e+06	1.96364e+08	58424.8	2.14938		0	2020-11-17	0.592688		0.8	0.0273171	0.0464669	0.53475	0.000982327	0.000982327	0.8	0.407312	0.942507	165700	0.011778	0.04		0.993571	0.875468	0.000982327	0.00115989	0.000985753	00:00:00	226392	2021-08-11			3.3131e+08	2021-02-28	0	1
2020-11-18	1.31471e+07	0		0	0.4	370823	993448	1.97207e+08	56209.7	2.15451		0	2020-11-18	0.595223		0.8	0.0263106	0.0449775	0.535858	0.000980354	0.000980354	0.8	0.404777	0.942507	166000	0.011778	0.04		0.993776	0.872096	0.000980354	0.00115666	0.000983762	00:00:00	227087	2021-08-11			3.31315e+08	2021-02-28	0	1
2020-11-19	1.32011e+07	0		0	0.4	357375	961375	1.98017e+08	54010.5	2.15897		0	2020-11-19	0.597659		0.8	0.0253106	0.0435247	0.536816	0.000978387	0.000978387	0.8	0.402341	0.942507	166300	0.011778	0.04		0.993983	0.868642	0.000978387	0.00115344	0.000981776	00:00:00	227755	2021-08-11			3.31321e+08	2021-02-28	0	1
2020-11-20	1.3253e+07	0		0	0.4	344040	929638	1.98794e+08	51831.3	2.16284		0	2020-11-20	0.599996		0.8	0.0243223	0.0420871	0.537645	0.000976424	0.000976424	0.8	0.400004	0.942507	166600	0.011778	0.04		0.994192	0.865146	0.000976424	0.00115023	0.000979796	00:00:00	228396	2021-08-11			3.31326e+08	2021-02-28	0	1
2020-11-21	1.33026e+07	0		0	0.4	330820	897796	1.9954e+08	49684.7	2.16621		0	2020-11-21	0.602235		0.8	0.0233457	0.0406449	0.538363	0.000974467	0.000974467	0.8	0.397765	0.942507	166900	0.011778	0.04		0.994401	0.861641	0.000974467	0.00114703	0.00097782	00:00:00	229010	2021-08-11			3.31332e+08	2021-02-28	0	1
2020-11-22	1.33502e+07	0		0	0.4	317733	866405	2.00253e+08	47572.1	2.16913		0	2020-11-22	0.604379		0.8	0.0223819	0.0392231	0.538986	0.000972514	0.000972514	0.8	0.395621	0.942507	167200	0.011778	0.04		0.994611	0.858154	0.000972514	0.00114385	0.00097585	00:00:00	229599	2021-08-11			3.31337e+08	2021-02-28	0	1
2020-11-23	1.33957e+07	0		0	0.4	304805	835334	2.00936e+08	45497.2	2.17167		0	2020-11-23	0.606429		0.8	0.0214328	0.0378159	0.539525	0.000970567	0.000970567	0.8	0.393571	0.942507	167500	0.011778	0.04		0.994819	0.854707	0.000970567	0.00114067	0.000973884	00:00:00	230161	2021-08-11			3.31343e+08	2021-02-28	0	1
2020-11-24	1.34392e+07	0		0	0.4	292060	804533	2.01588e+08	43464	2.17388		0	2020-11-24	0.608386		0.8	0.0204999	0.0364209	0.539992	0.000968625	0.000968625	0.8	0.391614	0.942507	167800	0.011778	0.04		0.995026	0.85132	0.000968625	0.0011375	0.000971924	00:00:00	230699	2021-08-11			3.31348e+08	2021-02-28	0	1
2020-11-25	1.34806e+07	0		0	0.4	279525	774059	2.0221e+08	41476	2.17579		0	2020-11-25	0.610254		0.8	0.019585	0.0350408	0.540398	0.000966687	0.000966687	0.8	0.389746	0.942507	168100	0.011778	0.04		0.995231	0.848008	0.000966687	0.00113435	0.000969969	00:00:00	231212	2021-08-11			3.31353e+08	2021-02-28	0	1
2020-11-26	1.35202e+07	0		0	0.4	267231	743896	2.02803e+08	39536.9	2.17746		0	2020-11-26	0.612033		0.8	0.0186903	0.0336748	0.540749	0.000964755	0.000964755	0.8	0.387967	0.942507	168400	0.011778	0.04		0.995434	0.844782	0.000964755	0.00113121	0.000968019	00:00:00	231701	2021-08-11			3.31359e+08	2021-02-28	0	1
2020-11-27	1.35578e+07	0		0	0.4	255196	714088	2.03368e+08	37650.3	2.17891		0	2020-11-27	0.613728		0.8	0.0178168	0.0323249	0.541055	0.000962828	0.000962828	0.8	0.386272	0.942507	168700	0.011778	0.04		0.995633	0.841652	0.000962828	0.00112808	0.000966074	00:00:00	232166	2021-08-11			3.31364e+08	2021-02-28	0	1
2020-11-28	1.35937e+07	0		0	0.4	243443	684740	2.03905e+08	35818.4	2.18017		0	2020-11-28	0.615339		0.8	0.0169661	0.0309959	0.541319	0.000960905	0.000960905	0.8	0.384661	0.942507	169000	0.011778	0.04		0.995829	0.838625	0.000960905	0.00112495	0.000964134	00:00:00	232609	2021-08-11			3.3137e+08	2021-02-28	0	1
2020-11-29	1.36277e+07	0		0	0.4	231989	655878	2.04415e+08	34043.3	2.18126		0	2020-11-29	0.61687		0.8	0.0161392	0.0296889	0.541549	0.000958988	0.000958988	0.8	0.38313	0.942507	169300	0.011778	0.04		0.99602	0.835706	0.000958988	0.00112184	0.000962199	00:00:00	233030	2021-08-11			3.31375e+08	2021-02-28	0	1
2020-11-30	1.366e+07	0		0	0.4	220851	627546	2.049e+08	32326.5	2.18221		0	2020-11-30	0.618323		0.8	0.0153372	0.0284059	0.541749	0.000957075	0.000957075	0.8	0.381677	0.942507	169600	0.011778	0.04		0.996207	0.832899	0.000957075	0.00111874	0.000960268	00:00:00	233430	2021-08-11			3.31381e+08	2021-02-28	0	1
2020-12-01	1.36907e+07	0		0	0.4	210045	599790	2.0536e+08	30669.4	2.18303		0	2020-12-01	0.619701		0.8	0.0145609	0.0271491	0.541922	0.000955167	0.000955167	0.8	0.380299	0.942507	169900	0.011778	0.04		0.996389	0.830205	0.000955167	0.00111565	0.000958343	00:00:00	233810	2021-08-11			3.31386e+08	2021-02-28	0	1
2020-12-02	1.37198e+07	0		0	0.4	199581	572653	2.05796e+08	29072.9	2.18375		0	2020-12-02	0.621007		0.8	0.0138112	0.0259204	0.542072	0.000953264	0.000953264	0.8	0.378993	0.942507	170200	0.011778	0.04		0.996566	0.827627	0.000953264	0.00111257	0.000956423	00:00:00	234169	2021-08-11			3.31392e+08	2021-02-28	0	1
2020-12-03	1.37473e+07	0		0	0.4	189468	546181	2.0621e+08	27537.6	2.18437		0	2020-12-03	0.622243		0.8	0.0130883	0.0247217	0.542203	0.000951366	0.000951366	0.8	0.377757	0.942507	170500	0.011778	0.04		0.996738	0.825162	0.000951366	0.0011095	0.000954508	00:00:00	234510	2021-08-11			3.31397e+08	2021-02-28	0	1
2020-12-04	1.37734e+07	0		0	0.4	179713	520413	2.066e+08	26063.4	2.18491		0	2020-12-04	0.623413		0.8	0.0123926	0.023555	0.542316	0.000949473	0.000949473	0.8	0.376587	0.942507	170800	0.011778	0.04		0.996904	0.822812	0.000949473	0.00110645	0.000952597	00:00:00	234832	2021-08-11			3.31403e+08	2021-02-28	0	1
2020-12-05	1.3798e+07	0		0	0.4	170320	495378	2.0697e+08	24650.3	2.18539		0	2020-12-05	0.624518		0.8	0.0117243	0.0224215	0.542415	0.000947585	0.000947585	0.8	0.375482	0.942507	171100	0.011778	0.04		0.997065	0.820573	0.000947585	0.0011034	0.000950692	00:00:00	235137	2021-08-11			3.31408e+08	2021-02-28	0	1
2020-12-06	1.38213e+07	0		0	0.4	161291	471104	2.0732e+08	23297.7	2.18579		0	2020-12-06	0.625562		0.8	0.0110834	0.0213225	0.5425	0.000945701	0.000945701	0.8	0.374438	0.942507	171400	0.011778	0.04		0.997219	0.818444	0.000945701	0.00110036	0.000948791	00:00:00	235425	2021-08-11			3.31413e+08	2021-02-28	0	1
2020-12-07	1.38433e+07	0		0	0.4	152627	447612	2.0765e+08	22004.9	2.18615		0	2020-12-07	0.626548		0.8	0.0104696	0.0202589	0.542575	0.000943823	0.000943823	0.8	0.373452	0.942507	171700	0.011778	0.04		0.997368	0.816422	0.000943823	0.00109733	0.000946896	00:00:00	235697	2021-08-11			3.31419e+08	2021-02-28	0	1
2020-12-08	1.38641e+07	0		0	0.4	144325	424918	2.07961e+08	20770.9	2.18646		0	2020-12-08	0.627478		0.8	0.00988288	0.0192315	0.542639	0.000941949	0.000941949	0.8	0.372522	0.942507	172000	0.011778	0.04		0.99751	0.814504	0.000941949	0.00109431	0.000945005	00:00:00	235954	2021-08-11			3.31424e+08	2021-02-28	0	1
2020-12-09	1.38837e+07	0		0	0.4	136382	403037	2.08255e+08	19594.6	2.18673		0	2020-12-09	0.628354		0.8	0.00932271	0.0182408	0.542695	0.000940079	0.000940079	0.8	0.371646	0.942507	172300	0.011778	0.04		0.997647	0.812687	0.000940079	0.00109131	0.000943119	00:00:00	236196	2021-08-11			3.3143e+08	2021-02-28	0	1
2020-12-10	1.39022e+07	0		0	0.4	128793	381975	2.08532e+08	18474.6	2.18696		0	2020-12-10	0.62918		0.8	0.00878866	0.0172873	0.542744	0.000938215	0.000938215	0.8	0.37082	0.942507	172600	0.011778	0.04		0.997778	0.810968	0.000938215	0.00108831	0.000941237	00:00:00	236425	2021-08-11			3.31435e+08	2021-02-28	0	1
2020-12-11	1.39196e+07	0		0	0.4	121552	361734	2.08794e+08	17409.4	2.18716		0	2020-12-11	0.629958		0.8	0.00828016	0.016371	0.542786	0.000936355	0.000936355	0.8	0.370042	0.942507	172900	0.011778	0.04		0.997903	0.809342	0.000936355	0.00108532	0.000939361	00:00:00	236640	2021-08-11			3.31441e+08	2021-02-28	0	1
2020-12-12	1.3936e+07	0		0	0.4	114652	342313	2.09039e+08	16397.5	2.18734		0	2020-12-12	0.630689		0.8	0.00779659	0.0154918	0.542823	0.0009345	0.0009345	0.8	0.369311	0.942507	173200	0.011778	0.04		0.998023	0.807807	0.0009345	0.00108235	0.000937489	00:00:00	236843	2021-08-11			3.31446e+08	2021-02-28	0	1
2020-12-13	1.39514e+07	0		0	0.4	108084	323707	2.09271e+08	15437.2	2.18749		0	2020-12-13	0.631377		0.8	0.00733726	0.0146495	0.542855	0.00093265	0.00093265	0.8	0.368623	0.942507	173500	0.011778	0.04		0.998136	0.806358	0.00093265	0.00107938	0.000935622	00:00:00	237034	2021-08-11			3.31452e+08	2021-02-28	0	1
2020-12-14	1.39659e+07	0		0	0.4	101840	305907	2.09489e+08	14526.6	2.18762		0	2020-12-14	0.632025		0.8	0.00690144	0.0138437	0.542883	0.000930804	0.000930804	0.8	0.367975	0.942507	173800	0.011778	0.04		0.998245	0.804991	0.000930804	0.00107642	0.00093376	00:00:00	237213	2021-08-11			3.31457e+08	2021-02-28	0	1
2020-12-15	1.39796e+07	0		0	0.4	95909.5	288902	2.09694e+08	13664.1	2.18774		0	2020-12-15	0.632632		0.8	0.00648834	0.013074	0.542907	0.000928963	0.000928963	0.8	0.367368	0.942507	174100	0.011778	0.04		0.998348	0.803704	0.000928963	0.00107348	0.000931902	00:00:00	237382	2021-08-11			3.31462e+08	2021-02-28	0	1
2020-12-16	1.39924e+07	0		0	0.4	90282.6	272677	2.09887e+08	12847.7	2.18784		0	2020-12-16	0.633203		0.8	0.00609718	0.0123395	0.542928	0.000927127	0.000927127	0.8	0.366797	0.942507	174400	0.011778	0.04		0.998446	0.802491	0.000927127	0.00107054	0.00093005	00:00:00	237541	2021-08-11			3.31468e+08	2021-02-28	0	1
2020-12-17	1.40045e+07	0		0	0.4	84948.9	257215	2.10068e+08	12075.7	2.18792		0	2020-12-17	0.63374		0.8	0.00572711	0.0116396	0.542946	0.000925295	0.000925295	0.8	0.36626	0.942507	174700	0.011778	0.04		0.998539	0.80135	0.000925295	0.00106761	0.000928201	00:00:00	237691	2021-08-11			3.31473e+08	2021-02-28	0	1
2020-12-18	1.40159e+07	0		0	0.4	79897.3	242497	2.10238e+08	11346	2.188		0	2020-12-18	0.634243		0.8	0.00537731	0.0109734	0.542962	0.000923468	0.000923468	0.8	0.365757	0.942507	175000	0.011778	0.04		0.998627	0.800277	0.000923468	0.00106469	0.000926358	00:00:00	237831	2021-08-11			3.31479e+08	2021-02-28	0	1
2020-12-19	1.40265e+07	0		0	0.4	75117.1	228504	2.10398e+08	10657	2.18807		0	2020-12-19	0.634714		0.8	0.00504694	0.01034	0.542975	0.000921645	0.000921645	0.8	0.365286	0.942507	175300	0.011778	0.04		0.99871	0.799269	0.000921645	0.00106179	0.000924519	00:00:00	237963	2021-08-11			3.31484e+08	2021-02-28	0	1
2020-12-20	1.40365e+07	0		0	0.4	70597.2	215213	2.10548e+08	10006.7	2.18812		0	2020-12-20	0.635157		0.8	0.00473515	0.00973845	0.542987	0.000919827	0.000919827	0.8	0.364843	0.942507	175600	0.011778	0.04		0.998789	0.798322	0.000919827	0.00105889	0.000922685	00:00:00	238086	2021-08-11			3.3149e+08	2021-02-28	0	1
2020-12-21	1.40459e+07	0		0	0.4	66326.6	202602	2.10689e+08	9393.43	2.18817		0	2020-12-21	0.635571		0.8	0.00444112	0.00916763	0.542998	0.000918014	0.000918014	0.8	0.364429	0.942507	175900	0.011778	0.04		0.998864	0.797433	0.000918014	0.001056	0.000920856	00:00:00	238203	2021-08-11			3.31495e+08	2021-02-28	0	1
2020-12-22	1.40547e+07	0		0	0.4	62294.2	190646	2.10821e+08	8815.34	2.18822		0	2020-12-22	0.63596		0.8	0.00416402	0.0086265	0.543007	0.000916205	0.000916205	0.8	0.36404	0.942507	176200	0.011778	0.04		0.998934	0.796599	0.000916205	0.00105312	0.000919031	00:00:00	238312	2021-08-11			3.31501e+08	2021-02-28	0	1
2020-12-23	1.4063e+07	0		0	0.4	58489.2	179322	2.10945e+08	8270.72	2.18825		0	2020-12-23	0.636324		0.8	0.00390303	0.00811398	0.543015	0.000914401	0.000914401	0.8	0.363676	0.942507	176500	0.011778	0.04		0.999001	0.795816	0.000914401	0.00105025	0.000917211	00:00:00	238414	2021-08-11			3.31506e+08	2021-02-28	0	1
2020-12-24	1.40708e+07	0		0	0.4	54901.1	168605	2.11061e+08	7757.89	2.18829		0	2020-12-24	0.636664		0.8	0.00365738	0.00762894	0.543021	0.000912601	0.000912601	0.8	0.363336	0.942507	176800	0.011778	0.04		0.999064	0.795083	0.000912601	0.00104739	0.000915395	00:00:00	238510	2021-08-11			3.31511e+08	2021-02-28	0	1
2020-12-25	1.4078e+07	0		0	0.4	51519.4	158471	2.11171e+08	7275.25	2.18831		0	2020-12-25	0.636983		0.8	0.00342628	0.00717028	0.543027	0.000910806	0.000910806	0.8	0.363017	0.942507	177100	0.011778	0.04		0.999123	0.794396	0.000910806	0.00104454	0.000913584	00:00:00	238600	2021-08-11			3.31517e+08	2021-02-28	0	1
2020-12-26	1.40849e+07	0		0	0.4	48333.8	148895	2.11273e+08	6821.2	2.18834		0	2020-12-26	0.637281		0.8	0.00320899	0.00673687	0.543032	0.000909015	0.000909015	0.8	0.362719	0.942507	177400	0.011778	0.04		0.999179	0.793752	0.000909015	0.0010417	0.000911777	00:00:00	238684	2021-08-11			3.31522e+08	2021-02-28	0	1
2020-12-27	1.40913e+07	0		0	0.4	45334.6	139852	2.11369e+08	6394.24	2.18836		0	2020-12-27	0.63756		0.8	0.00300479	0.00632761	0.543037	0.000907229	0.000907229	0.8	0.36244	0.942507	177700	0.011778	0.04		0.999231	0.79315	0.000907229	0.00103887	0.000909975	00:00:00	238763	2021-08-11			3.31528e+08	2021-02-28	0	1
2020-12-28	1.40972e+07	0		0	0.4	42512.2	131318	2.11459e+08	5992.91	2.18838		0	2020-12-28	0.63782		0.8	0.00281297	0.0059414	0.543041	0.000905447	0.000905447	0.8	0.36218	0.942507	178000	0.011778	0.04		0.999281	0.792586	0.000905447	0.00103605	0.000908178	00:00:00	238837	2021-08-11			3.31533e+08	2021-02-28	0	1
2020-12-29	1.41029e+07	0		0	0.4	39857.3	123270	2.11543e+08	5615.8	2.18839		0	2020-12-29	0.638064		0.8	0.00263286	0.00557717	0.543044	0.000903669	0.000903669	0.8	0.361936	0.942507	178300	0.011778	0.04		0.999327	0.792059	0.000903669	0.00103324	0.000906384	00:00:00	238907	2021-08-11			3.31539e+08	2021-02-28	0	1
2020-12-30	1.41081e+07	0		0	0.4	37361	115684	2.11622e+08	5261.59	2.18841		0	2020-12-30	0.638292		0.8	0.00246381	0.00523386	0.543047	0.000901896	0.000901896	0.8	0.361708	0.942507	178600	0.011778	0.04		0.999371	0.791566	0.000901896	0.00103043	0.000904596	00:00:00	238972	2021-08-11			3.31544e+08	2021-02-28	0	1
2020-12-31	1.41131e+07	0		0	0.4	35014.7	108537	2.11696e+08	4928.97	2.18842		0	2020-12-31	0.638504		0.8	0.00230521	0.00491045	0.543049	0.000900128	0.000900128	0.8	0.361496	0.942507	178900	0.011778	0.04		0.999412	0.791105	0.000900128	0.00102764	0.000902812	00:00:00	239033	2021-08-11			3.3155e+08	2021-02-28	0	1
2021-01-01	1.41177e+07	0		0	0.4	32810.3	101808	2.11765e+08	4616.74	2.18843		0	2021-01-01	0.638703		0.8	0.00215647	0.00460592	0.543052	0.000898364	0.000898364	0.8	0.361297	0.942507	179200	0.011778	0.04		0.999451	0.790675	0.000898364	0.00102485	0.000901032	00:00:00	239090	2021-08-11			3.31555e+08	2021-02-28	0	1
2021-01-02	1.4122e+07	0		0	0.4	30739.7	95474.5	2.1183e+08	4323.73	2.18844		0	2021-01-02	0.638888		0.8	0.002017	0.00431933	0.543054	0.000896604	0.000896604	0.8	0.361112	0.942507	179500	0.011778	0.04		0.999488	0.790273	0.000896604	0.00102208	0.000899257	00:00:00	239143	2021-08-11			3.31561e+08	2021-02-28	0	1
2021-01-03	1.4126e+07	0		0	0.4	28795.6	89516.6	2.11891e+08	4048.81	2.18845		0	2021-01-03	0.63906		0.8	0.00188629	0.00404972	0.543055	0.000894848	0.000894848	0.8	0.36094	0.942507	179800	0.011778	0.04		0.999522	0.789898	0.000894848	0.00101931	0.000897486	00:00:00	239193	2021-08-11			3.31566e+08	2021-02-28	0	1
2021-01-04	1.41298e+07	0		0	0.4	26970.8	83914.1	2.11948e+08	3790.95	2.18846		0	2021-01-04	0.639221		0.8	0.00176381	0.0037962	0.543057	0.000893097	0.000893097	0.8	0.360779	0.942507	180100	0.011778	0.04		0.999554	0.789548	0.000893097	0.00101655	0.00089572	00:00:00	239240	2021-08-11			3.31571e+08	2021-02-28	0	1
2021-01-05	1.41334e+07	0		0	0.4	25258.3	78647.9	2.12001e+08	3549.13	2.18846		0	2021-01-05	0.639371		0.8	0.00164907	0.00355791	0.543058	0.00089135	0.00089135	0.8	0.360629	0.942507	180400	0.011778	0.04		0.999584	0.789222	0.00089135	0.00101381	0.000893958	00:00:00	239284	2021-08-11			3.31577e+08	2021-02-28	0	1
2021-01-06	1.41367e+07	0		0	0.4	23651.8	73699.6	2.12051e+08	3322.41	2.18847		0	2021-01-06	0.639511		0.8	0.00154162	0.003334	0.543059	0.000889608	0.000889608	0.8	0.360489	0.942507	180700	0.011778	0.04		0.999612	0.788918	0.000889608	0.00101107	0.0008922	00:00:00	239325	2021-08-11			3.31582e+08	2021-02-28	0	1
2021-01-07	1.41398e+07	0		0	0.4	22144.9	69051.6	2.12097e+08	3109.89	2.18847		0	2021-01-07	0.639641		0.8	0.00144101	0.00312368	0.54306	0.00088787	0.00088787	0.8	0.360359	0.942507	181000	0.011778	0.04		0.999639	0.788635	0.00088787	0.00100834	0.000890447	00:00:00	239364	2021-08-11			3.31588e+08	2021-02-28	0	1
2021-01-08	1.41427e+07	0		0	0.4	20731.9	64687.1	2.12141e+08	2910.71	2.18848		0	2021-01-08	0.639762		0.8	0.00134683	0.0029262	0.543061	0.000886136	0.000886136	0.8	0.360238	0.942507	181300	0.011778	0.04		0.999664	0.788371	0.000886136	0.00100561	0.000888698	00:00:00	239400	2021-08-11			3.31593e+08	2021-02-28	0	1
2021-01-09	1.41455e+07	0		0	0.4	19407.2	60590	2.12182e+08	2724.08	2.18848		0	2021-01-09	0.639875		0.8	0.00125869	0.00274081	0.543062	0.000884406	0.000884406	0.8	0.360125	0.942507	181600	0.011778	0.04		0.999687	0.788126	0.000884406	0.0010029	0.000886954	00:00:00	239433	2021-08-11			3.31599e+08	2021-02-28	0	1
2021-01-10	1.4148e+07	0		0	0.4	18165.5	56745	2.1222e+08	2549.22	2.18848		0	2021-01-10	0.63998		0.8	0.00117621	0.00256684	0.543062	0.000882681	0.000882681	0.8	0.36002	0.942507	181900	0.011778	0.04		0.999709	0.787897	0.000882681	0.0010002	0.000885214	00:00:00	239465	2021-08-11			3.31604e+08	2021-02-28	0	1
2021-01-11	1.41504e+07	0		0	0.4	17001.7	53137.5	2.12256e+08	2385.42	2.18848		0	2021-01-11	0.640077		0.8	0.00109905	0.00240362	0.543063	0.00088096	0.00088096	0.8	0.359923	0.942507	182200	0.011778	0.04		0.99973	0.787685	0.00088096	0.000997503	0.000883478	00:00:00	239494	2021-08-11			3.3161e+08	2021-02-28	0	1
2021-01-12	1.41526e+07	0		0	0.4	15911.3	49753.7	2.12289e+08	2232.01	2.18849		0	2021-01-12	0.640168		0.8	0.00102687	0.00225052	0.543063	0.000879243	0.000879243	0.8	0.359832	0.942507	182500	0.011778	0.04		0.999749	0.787488	0.000879243	0.000994817	0.000881746	00:00:00	239522	2021-08-11			3.31615e+08	2021-02-28	0	1
2021-01-13	1.41547e+07	0		0	0.4	14889.8	46580.4	2.12321e+08	2088.33	2.18849		0	2021-01-13	0.640252		0.8	0.000959363	0.00210695	0.543064	0.000877531	0.000877531	0.8	0.359748	0.942507	182800	0.011778	0.04		0.999767	0.787305	0.000877531	0.000992139	0.000880019	00:00:00	239548	2021-08-11			3.31621e+08	2021-02-28	0	1
2021-01-14	1.41567e+07	0		0	0.4	13932.9	43605.2	2.1235e+08	1953.8	2.18849		0	2021-01-14	0.64033		0.8	0.000896237	0.00197234	0.543064	0.000875822	0.000875822	0.8	0.35967	0.942507	183100	0.011778	0.04		0.999784	0.787135	0.000875822	0.00098947	0.000878296	00:00:00	239572	2021-08-11			3.31626e+08	2021-02-28	0	1
2021-01-15	1.41585e+07	0		0	0.4	13036.6	40816.3	2.12377e+08	1827.84	2.18849		0	2021-01-15	0.640402		0.8	0.000837214	0.00184616	0.543064	0.000874118	0.000874118	0.8	0.359598	0.942507	183400	0.011778	0.04		0.999799	0.786978	0.000874118	0.00098681	0.000876577	00:00:00	239595	2021-08-11			3.31631e+08	2021-02-28	0	1
2021-01-16	1.41602e+07	0		0	0.4	12197.3	38202.5	2.12403e+08	1709.92	2.18849		0	2021-01-16	0.640469		0.8	0.000782035	0.00172791	0.543065	0.000872418	0.000872418	0.8	0.359531	0.942507	183700	0.011778	0.04		0.999814	0.786832	0.000872418	0.000984159	0.000874863	00:00:00	239616	2021-08-11			3.31637e+08	2021-02-28	0	1
2021-01-17	1.41618e+07	0		0	0.4	11411.4	35753.3	2.12427e+08	1599.54	2.18849		0	2021-01-17	0.64053		0.8	0.000730455	0.0016171	0.543065	0.000870722	0.000870722	0.8	0.35947	0.942507	184000	0.011778	0.04		0.999828	0.786697	0.000870722	0.000981516	0.000873152	00:00:00	239636	2021-08-11			3.31642e+08	2021-02-28	0	1
2021-01-18	1.41633e+07	0		0	0.4	10675.7	33458.5	2.12449e+08	1496.23	2.1885		0	2021-01-18	0.640587		0.8	0.000682245	0.00151329	0.543065	0.00086903	0.00086903	0.8	0.359413	0.942507	184300	0.011778	0.04		0.999841	0.786573	0.00086903	0.000978882	0.000871446	00:00:00	239654	2021-08-11			3.31648e+08	2021-02-28	0	1
2021-01-19	1.41647e+07	0		0	0.4	9986.86	31308.9	2.1247e+08	1399.53	2.1885		0	2021-01-19	0.64064		0.8	0.000637189	0.00141604	0.543065	0.000867343	0.000867343	0.8	0.35936	0.942507	184600	0.011778	0.04		0.999853	0.786457	0.000867343	0.000976256	0.000869744	00:00:00	239671	2021-08-11			3.31653e+08	2021-02-28	0	1
2021-01-20	1.4166e+07	0		0	0.4	9342.1	29295.6	2.1249e+08	1309.04	2.1885		0	2021-01-20	0.640689		0.8	0.000595085	0.00132496	0.543065	0.00086566	0.00086566	0.8	0.359311	0.942507	184900	0.011778	0.04		0.999865	0.786351	0.00086566	0.000973639	0.000868047	00:00:00	239688	2021-08-11			3.31659e+08	2021-02-28	0	1
2021-01-21	1.41672e+07	0		0	0.4	8738.62	27410	2.12508e+08	1224.36	2.1885		0	2021-01-21	0.640734		0.8	0.000555742	0.00123966	0.543065	0.00086398	0.00086398	0.8	0.359266	0.942507	185200	0.011778	0.04		0.999875	0.786253	0.00086398	0.00097103	0.000866353	00:00:00	239703	2021-08-11			3.31664e+08	2021-02-28	0	1
2021-01-22	1.41684e+07	0		0	0.4	8173.83	25644.5	2.12526e+08	1145.13	2.1885		0	2021-01-22	0.640775		0.8	0.000518983	0.00115979	0.543066	0.000862305	0.000862305	0.8	0.359225	0.942507	185500	0.011778	0.04		0.999885	0.786163	0.000862305	0.00096843	0.000864664	00:00:00	239717	2021-08-11			3.3167e+08	2021-02-28	0	1
2021-01-23	1.41694e+07	0		0	0.4	7645.28	23991.4	2.12542e+08	1070.99	2.1885		0	2021-01-23	0.640813		0.8	0.00048464	0.00108501	0.543066	0.000860634	0.000860634	0.8	0.359187	0.942507	185800	0.011778	0.04		0.999894	0.78608	0.000860634	0.000965838	0.000862978	00:00:00	239730	2021-08-11			3.31675e+08	2021-02-28	0	1
2021-01-24	1.41704e+07	0		0	0.4	7150.69	22443.8	2.12557e+08	1001.63	2.1885		0	2021-01-24	0.640848		0.8	0.000452556	0.001015	0.543066	0.000858967	0.000858967	0.8	0.359152	0.942507	186100	0.011778	0.04		0.999903	0.786004	0.000858967	0.000963254	0.000861297	00:00:00	239743	2021-08-11			3.3168e+08	2021-02-28	0	1
2021-01-25	1.41714e+07	0		0	0.4	6687.91	20995.1	2.12571e+08	936.746	2.1885		0	2021-01-25	0.64088		0.8	0.000422586	0.000949472	0.543066	0.000857304	0.000857304	0.8	0.35912	0.942507	186400	0.011778	0.04		0.999911	0.785935	0.000857304	0.000960679	0.00085962	00:00:00	239754	2021-08-11			3.31686e+08	2021-02-28	0	1
2021-01-26	1.41723e+07	0		0	0.4	6254.91	19639.1	2.12584e+08	876.043	2.1885		0	2021-01-26	0.640909		0.8	0.000394592	0.000888136	0.543066	0.000855645	0.000855645	0.8	0.359091	0.942507	186700	0.011778	0.04		0.999919	0.785871	0.000855645	0.000958112	0.000857947	00:00:00	239765	2021-08-11			3.31691e+08	2021-02-28	0	1
2021-01-27	1.41731e+07	0		0	0.4	5849.81	18370.1	2.12596e+08	819.259	2.1885		0	2021-01-27	0.640935		0.8	0.000368443	0.000830732	0.543066	0.00085399	0.00085399	0.8	0.359065	0.942507	187000	0.011778	0.04		0.999926	0.785813	0.00085399	0.000955553	0.000856279	00:00:00	239775	2021-08-11			3.31697e+08	2021-02-28	0	1
2021-01-28	1.41738e+07	0		0	0.4	5470.82	17182.4	2.12608e+08	766.143	2.1885		0	2021-01-28	0.640959		0.8	0.000344022	0.000777011	0.543066	0.000852339	0.000852339	0.8	0.359041	0.942507	187300	0.011778	0.04		0.999933	0.785761	0.000852339	0.000953002	0.000854614	00:00:00	239785	2021-08-11			3.31702e+08	2021-02-28	0	1
2021-01-29	1.41746e+07	0		0	0.4	5116.29	16071	2.12618e+08	716.459	2.1885		0	2021-01-29	0.640981		0.8	0.000321213	0.000726741	0.543066	0.000850692	0.000850692	0.8	0.359019	0.942507	187600	0.011778	0.04		0.999939	0.785713	0.000850692	0.00095046	0.000852953	00:00:00	239793	2021-08-11			3.31708e+08	2021-02-28	0	1
2021-01-30	1.41752e+07	0		0	0.4	4784.64	15031.1	2.12628e+08	669.989	2.1885		0	2021-01-30	0.641001		0.8	0.000299912	0.000679703	0.543066	0.000849049	0.000849049	0.8	0.358999	0.942507	187900	0.011778	0.04		0.999945	0.78567	0.000849049	0.000947925	0.000851296	00:00:00	239802	2021-08-11			3.31713e+08	2021-02-28	0	1
2021-01-31	1.41759e+07	0		0	0.4	4474.42	14058.1	2.12638e+08	626.524	2.1885		0	2021-01-31	0.641019		0.8	0.000280019	0.000635693	0.543066	0.00084741	0.00084741	0.8	0.358981	0.942507	188200	0.011778	0.04		0.99995	0.785631	0.00084741	0.000945399	0.000849644	00:00:00	239809	2021-08-11			3.31719e+08	2021-02-28	0	1
2021-02-01	1.41765e+07	0		0	0.4	4205.1	13168.6	2.12647e+08	606.721	2.26638		0	2021-02-01	0.641036		1	0.000262746	0.000595461	0.558767	0.000845775	0.000845775	1	0.358964	0.942507	188500	0.011778	0		0.999953	0.813548	0.000845775	0.000942881	0.000847995	00:00:00	239817	2021-08-11			3.31724e+08	2021-02-28	0	1
2021-02-02	1.4177e+07	0		0	0.4	3960.91	12344.1	2.12656e+08	575.073	2.28584		0	2021-02-02	0.641051		1	0.000247095	0.000558171	0.562525	0.000844144	0.000844144	1	0.358949	0.942507	188800	0.011778	0		0.999957	0.820501	0.000844144	0.000940371	0.000846351	00:00:00	239824	2021-08-11			3.3173e+08	2021-02-28	0	1
2021-02-03	1.41776e+07	0		0	0.4	3742.19	11582.5	2.12664e+08	547.422	2.31018		0	2021-02-03	0.641065		1	0.00023308	0.000523724	0.567133	0.000842517	0.000842517	1	0.358935	0.942507	189100	0.011778	0		0.99996	0.829204	0.000842517	0.000937869	0.00084471	00:00:00	239831	2021-08-11			3.31735e+08	2021-02-28	0	1
2021-02-04	1.41781e+07	0		0	0.4	3549.71	10882.1	2.12672e+08	523.983	2.3406		0	2021-02-04	0.641078		1	0.000220742	0.000492047	0.572759	0.000840894	0.000840894	1	0.358922	0.942507	189400	0.011778	0		0.999963	0.840092	0.000840894	0.000935375	0.000843073	00:00:00	239837	2021-08-11			3.3174e+08	2021-02-28	0	1
2021-02-05	1.41786e+07	0		0	0.4	3380.68	10237.9	2.12679e+08	500.954	2.35916		0	2021-02-05	0.64109		1	0.000209898	0.000462912	0.57612	0.000839275	0.000839275	1	0.35891	0.942507	189700	0.011778	0		0.999966	0.846724	0.000839275	0.000932889	0.000841441	00:00:00	239844	2021-08-11			3.31746e+08	2021-02-28	0	1
2021-02-06	1.41791e+07	0		0	0.4	3234.94	9647.74	2.12686e+08	480.79	2.37748		0	2021-02-06	0.641102		1	0.000200532	0.000436219	0.579387	0.00083766	0.00083766	1	0.358898	0.942507	190000	0.011778	0		0.999969	0.853275	0.00083766	0.00093041	0.000839812	00:00:00	239849	2021-08-11			3.31751e+08	2021-02-28	0	1
2021-02-07	1.41796e+07	0		0	0.4	3091.53	9109.41	2.12693e+08	463.305	2.39431		0	2021-02-07	0.641112		1	0.00019134	0.000411871	0.582343	0.000836048	0.000836048	1	0.358888	0.942507	190300	0.011778	0		0.999971	0.859289	0.000836048	0.00092794	0.000838187	00:00:00	239855	2021-08-11			3.31757e+08	2021-02-28	0	1
2021-02-08	1.418e+07	0		0	0.4	2961.69	8617.9	2.127e+08	445.235	2.40774		0	2021-02-08	0.641122		1	0.000183015	0.000389642	0.584672	0.000834441	0.000834441	1	0.358878	0.942507	190600	0.011778	0		0.999973	0.864085	0.000834441	0.000925477	0.000836566	00:00:00	239861	2021-08-11			3.31762e+08	2021-02-28	0	1
2021-02-09	1.41804e+07	0		0	0.4	2842.94	8170.53	2.12706e+08	428.677	2.41988		0	2021-02-09	0.641131		1	0.000175401	0.000369409	0.586757	0.000832837	0.000832837	1	0.358869	0.942507	190900	0.011778	0		0.999975	0.868422	0.000832837	0.000923023	0.000834949	00:00:00	239866	2021-08-11			3.31768e+08	2021-02-28	0	1
2021-02-10	1.41808e+07	0		0	0.4	2732.24	7764.56	2.12713e+08	413.282	2.43048		0	2021-02-10	0.641139		1	0.000168307	0.000351048	0.588559	0.000831237	0.000831237	1	0.358861	0.942507	191200	0.011778	0		0.999977	0.872206	0.000831237	0.000920576	0.000833336	00:00:00	239871	2021-08-11			3.31773e+08	2021-02-28	0	1
2021-02-11	1.41812e+07	0		0	0.4	2629.95	7397.07	2.12719e+08	398.658	2.43953		0	2021-02-11	0.641146		1	0.000161752	0.000334428	0.590084	0.000829641	0.000829641	1	0.358854	0.942507	191500	0.011778	0		0.999979	0.875433	0.000829641	0.000918137	0.000831727	00:00:00	239876	2021-08-11			3.31779e+08	2021-02-28	0	1
2021-02-12	1.41816e+07	0		0	0.4	2534.13	7065.58	2.12724e+08	384.974	2.44747		0	2021-02-12	0.641153		1	0.000155615	0.000319436	0.591415	0.000828049	0.000828049	1	0.358847	0.942507	191800	0.011778	0		0.999981	0.878268	0.000828049	0.000915705	0.000830122	00:00:00	239881	2021-08-11			3.31784e+08	2021-02-28	0	1
2021-02-13	1.4182e+07	0		0	0.4	2442.81	6767.58	2.1273e+08	371.986	2.45437		0	2021-02-13	0.641159		1	0.000149773	0.000305958	0.592564	0.000826461	0.000826461	1	0.358841	0.942507	192100	0.011778	0		0.999983	0.880728	0.000826461	0.000913281	0.000828521	00:00:00	239885	2021-08-11			3.3179e+08	2021-02-28	0	1
2021-02-14	1.41824e+07	0		0	0.4	2357.02	6500.51	2.12735e+08	359.448	2.46034		0	2021-02-14	0.641165		1	0.000144288	0.000293879	0.593552	0.000824876	0.000824876	1	0.358835	0.942507	192400	0.011778	0		0.999984	0.882857	0.000824876	0.000910865	0.000826923	00:00:00	239890	2021-08-11			3.31795e+08	2021-02-28	0	1
2021-02-15	1.41827e+07	0		0	0.4	2275.9	6241.34	2.12741e+08	347.553	2.46555		0	2021-02-15	0.64117		1	0.000139105	0.000282158	0.59441	0.000823295	0.000823295	1	0.35883	0.942507	192700	0.011778	0		0.999986	0.884712	0.000823295	0.000908457	0.000825329	00:00:00	239894	2021-08-11			3.318e+08	2021-02-28	0	1
2021-02-16	1.4183e+07	0		0	0.4	2198.82	6002.47	2.12746e+08	336.201	2.47006		0	2021-02-16	0.641175		1	0.000134185	0.000271354	0.595152	0.000821718	0.000821718	1	0.358825	0.942507	193000	0.011778	0		0.999987	0.886321	0.000821718	0.000906056	0.00082374	00:00:00	239898	2021-08-11			3.31806e+08	2021-02-28	0	1
2021-02-17	1.41834e+07	0		0	0.4	2125.49	5780.37	2.1275e+08	325.326	2.47399		0	2021-02-17	0.641179		1	0.000129508	0.00026131	0.595794	0.000820145	0.000820145	1	0.358821	0.942507	193300	0.011778	0		0.999988	0.887719	0.000820145	0.000903663	0.000822154	00:00:00	239902	2021-08-11			3.31811e+08	2021-02-28	0	1
2021-02-18	1.41837e+07	0		0	0.4	2055.42	5571.29	2.12755e+08	314.906	2.4774		0	2021-02-18	0.641183		1	0.000125045	0.000251854	0.596351	0.000818576	0.000818576	1	0.358817	0.942507	193600	0.011778	0		0.99999	0.888934	0.000818576	0.000901277	0.000820571	00:00:00	239906	2021-08-11			3.31817e+08	2021-02-28	0	1
2021-02-19	1.4184e+07	0		0	0.4	1988.32	5375.23	2.1276e+08	304.886	2.48036		0	2021-02-19	0.641186		1	0.000120776	0.000242987	0.596833	0.00081701	0.00081701	1	0.358814	0.942507	193900	0.011778	0		0.999991	0.889989	0.00081701	0.000898898	0.000818993	00:00:00	239910	2021-08-11			3.31822e+08	2021-02-28	0	1
2021-02-20	1.41843e+07	0		0	0.4	1924.11	5189.67	2.12764e+08	295.237	2.48294		0	2021-02-20	0.641189		1	0.000116695	0.000234595	0.597251	0.000815448	0.000815448	1	0.358811	0.942507	194200	0.011778	0		0.999992	0.890906	0.000815448	0.000896528	0.000817418	00:00:00	239914	2021-08-11			3.31828e+08	2021-02-28	0	1
2021-02-21	1.41846e+07	0		0	0.4	1862.51	5012.32	2.12768e+08	285.957	2.48518		0	2021-02-21	0.641191		1	0.000112785	0.000226574	0.597614	0.00081389	0.00081389	1	0.358809	0.942507	194500	0.011778	0		0.999993	0.891703	0.00081389	0.000894164	0.000815847	00:00:00	239917	2021-08-11			3.31833e+08	2021-02-28	0	1
2021-02-22	1.41848e+07	0		0	0.4	1803.33	4844.11	2.12773e+08	277.018	2.48712		0	2021-02-22	0.641193		1	0.000109033	0.000218967	0.597928	0.000812335	0.000812335	1	0.358807	0.942507	194800	0.011778	0		0.999994	0.892395	0.000812335	0.000891808	0.00081428	00:00:00	239921	2021-08-11			3.31839e+08	2021-02-28	0	1
2021-02-23	1.41851e+07	0		0	0.4	1746.4	4683.83	2.12777e+08	268.396	2.48881		0	2021-02-23	0.641195		1	0.000105428	0.000211718	0.598201	0.000810784	0.000810784	1	0.358805	0.942507	195100	0.011778	0		0.999996	0.892997	0.000810784	0.00088946	0.000812717	00:00:00	239924	2021-08-11			3.31844e+08	2021-02-28	0	1
2021-02-24	1.41854e+07	0		0	0.4	1691.57	4530.62	2.12781e+08	260.075	2.49028		0	2021-02-24	0.641196		1	0.000101962	0.00020479	0.598438	0.000809237	0.000809237	1	0.358804	0.942507	195400	0.011778	0		0.999997	0.893521	0.000809237	0.000887118	0.000811157	00:00:00	239927	2021-08-11			3.3185e+08	2021-02-28	0	1
2021-02-25	1.41856e+07	0		0	0.4	1638.72	4384	2.12784e+08	252.038	2.49155		0	2021-02-25	0.641197		1	9.86246e-05	0.000198159	0.598644	0.000807694	0.000807694	1	0.358803	0.942507	195700	0.011778	0		0.999998	0.893976	0.000807694	0.000884784	0.000809601	00:00:00	239930	2021-08-11			3.31855e+08	2021-02-28	0	1
2021-02-26	1.41859e+07	0		0	0.4	1587.76	4243.3	2.12788e+08	244.272	2.49266		0	2021-02-26	0.641197		1	9.5411e-05	0.000191796	0.598822	0.000806154	0.000806154	1	0.358803	0.942507	196000	0.011778	0		0.999999	0.894373	0.000806154	0.000882458	0.000808049	00:00:00	239933	2021-08-11			3.3186e+08	2021-02-28	0	1
2021-02-27	1.41861e+07	0		0	0.4	1538.56	4108.08	2.12792e+08	236.766	2.49362		0	2021-02-27	0.641197		1	9.23137e-05	0.000185681	0.598977	0.000804618	0.000804618	1	0.358803	0.942507	196300	0.011778	0		1	0.894718	0.000804618	0.000880138	0.0008065	00:00:00	239936	2021-08-11			3.31866e+08	2021-02-28	0	1
2021-02-28	1.41863e+07	0		0	0.4	1491.05	3978.14	2.12795e+08	229.507	2.49446		0	2021-02-28	0.641197		1	8.93266e-05	0.000179805	0.599111	0.000803085	0.000803085	1	0.358803	0.942507	196600	0.011778	0		1	0.895018	0.000803085	0.000877826	0.000804956	00:00:00	239939	2021-08-11			3.31871e+08	2021-02-28	0	1
2021-03-01	1.41866e+07	0		0	0.4	1445.14	3853.07	2.12798e+08	222.485	2.49518		0	2021-03-01	0.641197		1	8.64442e-05	0.000174149	0.599228	0.000801556	0.000801556	1	0.358803	0.942507	196900	0.011778	0		1	0.89528	0.000801556	0.000875521	0.000803414	00:00:00	239942	2021-08-11			3.31877e+08	2021-03-01	0	1
2021-03-02	1.41868e+07	0		0	0.4	1400.76	3732.56	2.12802e+08	215.689	2.49582		0	2021-03-02	0.641196		1	8.36617e-05	0.000168699	0.599329	0.000800031	0.000800031	1	0.358804	0.942507	197200	0.011778	0		1	0.895509	0.000800031	0.000873224	0.000801877	00:00:00	239944	2021-08-11			3.31882e+08	2021-03-02	0	1
2021-03-03	1.4187e+07	0		0	0.4	1357.83	3616.34	2.12805e+08	209.111	2.49636		0	2021-03-03	0.641195		1	8.09746e-05	0.000163444	0.599417	0.000798509	0.000798509	1	0.358805	0.942507	197500	0.011778	0		1	0.895708	0.000798509	0.000870933	0.000800343	00:00:00	239947	2021-08-11			3.31888e+08	2021-03-03	0	1
2021-03-04	1.41872e+07	0		0	0.4	1316.3	3504.18	2.12808e+08	202.742	2.49684		0	2021-03-04	0.641194		1	7.83789e-05	0.000158372	0.599494	0.000796991	0.000796991	1	0.358806	0.942507	197800	0.011778	0		1	0.895883	0.000796991	0.00086865	0.000798813	00:00:00	239950	2021-08-11			3.31893e+08	2021-03-04	0	1
2021-03-05	1.41874e+07	0		0	0.4	1276.11	3395.87	2.12811e+08	196.574	2.49726		0	2021-03-05	0.641192		1	7.58707e-05	0.000153475	0.59956	0.000795476	0.000795476	1	0.358808	0.942507	198100	0.011778	0		1	0.896035	0.000795476	0.000866373	0.000797286	00:00:00	239952	2021-08-11			3.31899e+08	2021-03-05	0	1
2021-03-06	1.41876e+07	0		0	0.4	1237.2	3291.23	2.12814e+08	190.6	2.49762		0	2021-03-06	0.64119		1	7.34462e-05	0.000148743	0.599618	0.000793965	0.000793965	1	0.35881	0.942507	198400	0.011778	0		1.00001	0.896169	0.000793965	0.000864104	0.000795763	00:00:00	239954	2021-08-11			3.31904e+08	2021-03-06	0	1
2021-03-07	1.41878e+07	0		0	0.4	1199.53	3190.09	2.12816e+08	184.813	2.49793		0	2021-03-07	0.641188		1	7.11024e-05	0.00014417	0.599668	0.000792458	0.000792458	1	0.358812	0.942507	198700	0.011778	0		1.00001	0.896287	0.000792458	0.000861842	0.000794244	00:00:00	239957	2021-08-11			3.3191e+08	2021-03-07	0	1
2021-03-08	1.41879e+07	0		0	0.4	1163.05	3092.27	2.12819e+08	179.207	2.4982		0	2021-03-08	0.641185		1	6.88359e-05	0.000139747	0.599712	0.000790954	0.000790954	1	0.358815	0.942507	199000	0.011778	0		1.00001	0.896391	0.000790954	0.000859586	0.000792728	00:00:00	239959	2021-08-11			3.31915e+08	2021-03-08	0	1
2021-03-09	1.41881e+07	0		0	0.4	1127.71	2997.65	2.12822e+08	173.774	2.49844		0	2021-03-09	0.641183		1	6.6644e-05	0.000135469	0.59975	0.000789454	0.000789454	1	0.358817	0.942507	199300	0.011778	0		1.00001	0.896482	0.000789454	0.000857338	0.000791216	00:00:00	239961	2021-08-11			3.3192e+08	2021-03-09	0	1
2021-03-10	1.41883e+07	0		0	0.4	1093.48	2906.09	2.12824e+08	168.509	2.49864		0	2021-03-10	0.64118		1	6.45239e-05	0.000131328	0.599782	0.000787957	0.000787957	1	0.35882	0.942507	199600	0.011778	0		1.00001	0.896563	0.000787957	0.000855097	0.000789707	00:00:00	239963	2021-08-11			3.31926e+08	2021-03-10	0	1
2021-03-11	1.41884e+07	0		0	0.4	1060.31	2817.46	2.12827e+08	163.407	2.49882		0	2021-03-11	0.641177		1	6.24728e-05	0.000127321	0.599811	0.000786464	0.000786464	1	0.358823	0.942507	199900	0.011778	0		1.00001	0.896635	0.000786464	0.000852862	0.000788202	00:00:00	239965	2021-08-11			3.31931e+08	2021-03-11	0	1
2021-03-12	1.41886e+07	0		0	0.4	1028.17	2731.65	2.12829e+08	158.462	2.49897		0	2021-03-12	0.641173		1	6.04885e-05	0.000123441	0.599836	0.000784974	0.000784974	1	0.358827	0.942507	200200	0.011778	0		1.00001	0.896699	0.000784974	0.000850635	0.0007867	00:00:00	239967	2021-08-11			3.31937e+08	2021-03-12	0	1
2021-03-13	1.41888e+07	0		0	0.4	997.027	2648.55	2.12831e+08	153.668	2.49911		0	2021-03-13	0.64117		1	5.85684e-05	0.000119684	0.599857	0.000783488	0.000783488	1	0.35883	0.942507	200500	0.011778	0		1.00001	0.896756	0.000783488	0.000848414	0.000785202	00:00:00	239969	2021-08-11			3.31942e+08	2021-03-13	0	1
2021-03-14	1.41889e+07	0		0	0.4	966.842	2568.06	2.12834e+08	149.022	2.49923		0	2021-03-14	0.641166		1	5.67104e-05	0.000116045	0.599876	0.000782005	0.000782005	1	0.358834	0.942507	200800	0.011778	0		1.00001	0.896808	0.000782005	0.0008462	0.000783708	00:00:00	239971	2021-08-11			3.31948e+08	2021-03-14	0	1
2021-03-15	1.4189e+07	0		0	0.4	937.586	2490.1	2.12836e+08	144.518	2.49933		0	2021-03-15	0.641162		1	5.49123e-05	0.00011252	0.599892	0.000780525	0.000780525	1	0.358838	0.942507	201100	0.011778	0		1.00001	0.896854	0.000780525	0.000843993	0.000782217	00:00:00	239973	2021-08-11			3.31953e+08	2021-03-15	0	1
2021-03-16	1.41892e+07	0		0	0.4	909.228	2414.56	2.12838e+08	140.151	2.49942		0	2021-03-16	0.641158		1	5.31722e-05	0.000109105	0.599906	0.00077905	0.00077905	1	0.358842	0.942507	201400	0.011778	0		1.00001	0.896896	0.00077905	0.000841793	0.000780729	00:00:00	239974	2021-08-11			3.31959e+08	2021-03-16	0	1
2021-03-17	1.41893e+07	0		0	0.4	881.739	2341.37	2.1284e+08	135.918	2.49949		0	2021-03-17	0.641153		1	5.14879e-05	0.000105796	0.599919	0.000777577	0.000777577	1	0.358847	0.942507	201700	0.011778	0		1.00001	0.896935	0.000777577	0.0008396	0.000779245	00:00:00	239976	2021-08-11			3.31964e+08	2021-03-17	0	1
2021-03-18	1.41895e+07	0		0	0.4	855.091	2270.44	2.12842e+08	131.814	2.49956		0	2021-03-18	0.641149		1	4.98577e-05	0.000102589	0.599929	0.000776108	0.000776108	1	0.358851	0.942507	202000	0.011778	0		1.00001	0.89697	0.000776108	0.000837413	0.000777765	00:00:00	239978	2021-08-11			3.3197e+08	2021-03-18	0	1
2021-03-19	1.41896e+07	0		0	0.4	829.258	2201.7	2.12844e+08	127.835	2.49962		0	2021-03-19	0.641144		1	4.82797e-05	9.94818e-05	0.599939	0.000774642	0.000774642	1	0.358856	0.942507	202300	0.011778	0		1.00001	0.897003	0.000774642	0.000835233	0.000776288	00:00:00	239979	2021-08-11			3.31975e+08	2021-03-19	0	1
2021-03-20	1.41897e+07	0		0	0.4	804.213	2135.07	2.12846e+08	123.977	2.49967		0	2021-03-20	0.641139		1	4.67522e-05	9.64699e-05	0.599947	0.00077318	0.00077318	1	0.358861	0.942507	202600	0.011778	0		1.00001	0.897033	0.00077318	0.00083306	0.000774814	00:00:00	239981	2021-08-11			3.3198e+08	2021-03-20	0	1
2021-03-21	1.41898e+07	0		0	0.4	779.931	2070.5	2.12847e+08	120.236	2.49971		0	2021-03-21	0.641134		1	4.52736e-05	9.35505e-05	0.599954	0.000771722	0.000771722	1	0.358866	0.942507	202900	0.011778	0		1.00001	0.897062	0.000771722	0.000830893	0.000773344	00:00:00	239982	2021-08-11			3.31986e+08	2021-03-21	0	1
2021-03-22	1.41899e+07	0		0	0.4	756.39	2007.9	2.12849e+08	116.61	2.49975		0	2021-03-22	0.641129		1	4.38422e-05	9.07207e-05	0.59996	0.000770266	0.000770266	1	0.358871	0.942507	203200	0.011778	0		1.00001	0.897088	0.000770266	0.000828733	0.000771878	00:00:00	239984	2021-08-11			3.31991e+08	2021-03-22	0	1
2021-03-23	1.41901e+07	0		0	0.4	733.564	1947.22	2.12851e+08	113.093	2.49978		0	2021-03-23	0.641123		1	4.24566e-05	8.79776e-05	0.599965	0.000768814	0.000768814	1	0.358877	0.942507	203500	0.011778	0		1.00002	0.897114	0.000768814	0.00082658	0.000770414	00:00:00	239985	2021-08-11			3.31997e+08	2021-03-23	0	1
2021-03-24	1.41902e+07	0		0	0.4	711.434	1888.39	2.12852e+08	109.683	2.49981		0	2021-03-24	0.641117		1	4.11151e-05	8.53184e-05	0.59997	0.000767366	0.000767366	1	0.358883	0.942507	203800	0.011778	0		1.00002	0.897138	0.000767366	0.000824433	0.000768955	00:00:00	239986	2021-08-11			3.32002e+08	2021-03-24	0	1
2021-03-25	1.41903e+07	0		0	0.4	689.975	1831.36	2.12854e+08	106.377	2.49983		0	2021-03-25	0.641112		1	3.98164e-05	8.27404e-05	0.599974	0.00076592	0.00076592	1	0.358888	0.942507	204100	0.011778	0		1.00002	0.897161	0.00076592	0.000822292	0.000767498	00:00:00	239988	2021-08-11			3.32008e+08	2021-03-25	0	1
2021-03-26	1.41904e+07	0		0	0.4	669.169	1776.07	2.12856e+08	103.171	2.49986		0	2021-03-26	0.641106		1	3.8559e-05	8.0241e-05	0.599977	0.000764478	0.000764478	1	0.358894	0.942507	204400	0.011778	0		1.00002	0.897184	0.000764478	0.000820159	0.000766045	00:00:00	239989	2021-08-11			3.32013e+08	2021-03-26	0	1
2021-03-27	1.41905e+07	0		0	0.4	648.995	1722.47	2.12857e+08	100.062	2.49988		0	2021-03-27	0.6411		1	3.73417e-05	7.78179e-05	0.59998	0.00076304	0.00076304	1	0.3589	0.942507	204700	0.011778	0		1.00002	0.897206	0.00076304	0.000818031	0.000764595	00:00:00	239990	2021-08-11			3.32019e+08	2021-03-27	0	1
2021-03-28	1.41906e+07	0		0	0.4	629.433	1670.49	2.12859e+08	97.0476	2.49989		0	2021-03-28	0.641094		1	3.61632e-05	7.54685e-05	0.599983	0.000761605	0.000761605	1	0.358906	0.942507	205000	0.011778	0		1.00002	0.897227	0.000761605	0.000815911	0.000763149	00:00:00	239991	2021-08-11			3.32024e+08	2021-03-28	0	1
2021-03-29	1.41907e+07	0		0	0.4	610.465	1620.1	2.1286e+08	94.1246	2.49991		0	2021-03-29	0.641087		1	3.50221e-05	7.31907e-05	0.599985	0.000760173	0.000760173	1	0.358913	0.942507	205300	0.011778	0		1.00002	0.897248	0.000760173	0.000813796	0.000761706	00:00:00	239993	2021-08-11			3.3203e+08	2021-03-29	0	1
2021-03-30	1.41908e+07	0		0	0.4	592.072	1571.24	2.12861e+08	91.2901	2.49992		0	2021-03-30	0.641081		1	3.39174e-05	7.09821e-05	0.599987	0.000758744	0.000758744	1	0.358919	0.942507	205600	0.011778	0		1.00002	0.897268	0.000758744	0.000811689	0.000760267	00:00:00	239994	2021-08-11			3.32035e+08	2021-03-30	0	1
2021-03-31	1.41908e+07	0		0	0.4	574.237	1523.86	2.12863e+08	88.5416	2.49993		0	2021-03-31	0.641074		1	3.28478e-05	6.88407e-05	0.599989	0.000757319	0.000757319	1	0.358926	0.942507	205900	0.011778	0		1.00002	0.897288	0.000757319	0.000809587	0.000758831	00:00:00	239995	2021-08-11			3.32041e+08	2021-03-31	0	1
2021-04-01	1.41909e+07	0		0	0.4	556.942	1477.92	2.12864e+08	85.8763	2.49994		0	2021-04-01	0.641068		1	3.18121e-05	6.67644e-05	0.59999	0.000755897	0.000755897	1	0.358932	0.942507	206200	0.011778	0		1.00002	0.897308	0.000755897	0.000807492	0.000757398	00:00:00	239996	2021-08-11			3.32046e+08	2021-04-01	0	1
2021-04-02	1.4191e+07	0		0	0.4	540.172	1433.38	2.12865e+08	83.2918	2.49995		0	2021-04-02	0.641061		1	3.08094e-05	6.47511e-05	0.599991	0.000754478	0.000754478	1	0.358939	0.942507	206500	0.011778	0		1.00002	0.897328	0.000754478	0.000805403	0.000755968	00:00:00	239997	2021-08-11			3.32051e+08	2021-04-02	0	1
2021-04-03	1.41911e+07	0		0	0.4	523.91	1390.19	2.12866e+08	80.7855	2.49995		0	2021-04-03	0.641054		1	2.98385e-05	6.2799e-05	0.599993	0.000753063	0.000753063	1	0.358946	0.942507	206800	0.011778	0		1.00002	0.897348	0.000753063	0.000803321	0.000754542	00:00:00	239998	2021-08-11			3.32057e+08	2021-04-03	0	1
2021-04-04	1.41912e+07	0		0	0.4	508.14	1348.31	2.12868e+08	78.3551	2.49996		0	2021-04-04	0.641047		1	2.88985e-05	6.09061e-05	0.599994	0.000751651	0.000751651	1	0.358953	0.942507	207100	0.011778	0		1.00002	0.897368	0.000751651	0.000801245	0.000753119	00:00:00	239999	2021-08-11			3.32062e+08	2021-04-04	0	1
2021-04-05	1.41913e+07	0		0	0.4	492.849	1307.7	2.12869e+08	75.9983	2.49996		0	2021-04-05	0.64104		1	2.79882e-05	5.90706e-05	0.599994	0.000750242	0.000750242	1	0.35896	0.942507	207400	0.011778	0		1.00002	0.897387	0.000750242	0.000799175	0.000751699	00:00:00	240000	2021-08-11			3.32068e+08	2021-04-05	0	1
2021-04-06	1.41913e+07	0		0	0.4	478.02	1268.32	2.1287e+08	73.7128	2.49997		0	2021-04-06	0.641033		1	2.71069e-05	5.72908e-05	0.599995	0.000748836	0.000748836	1	0.358967	0.942507	207700	0.011778	0		1.00002	0.897407	0.000748836	0.000797112	0.000750283	00:00:00	240001	2021-08-11			3.32073e+08	2021-04-06	0	1
2021-04-07	1.41914e+07	0		0	0.4	463.64	1230.13	2.12871e+08	71.4965	2.49997		0	2021-04-07	0.641026		1	2.62536e-05	5.5565e-05	0.599996	0.000747434	0.000747434	1	0.358974	0.942507	208000	0.011778	0		1.00002	0.897427	0.000747434	0.000795054	0.00074887	00:00:00	240002	2021-08-11			3.32079e+08	2021-04-07	0	1
2021-04-08	1.41915e+07	0		0	0.4	449.695	1193.1	2.12872e+08	69.3472	2.49998		0	2021-04-08	0.641018		1	2.54273e-05	5.38915e-05	0.599996	0.000746034	0.000746034	1	0.358982	0.942507	208300	0.011778	0		1.00002	0.897446	0.000746034	0.000793003	0.00074746	00:00:00	240003	2021-08-11			3.32084e+08	2021-04-08	0	1
2021-04-09	1.41915e+07	0		0	0.4	436.173	1157.19	2.12873e+08	67.263	2.49998		0	2021-04-09	0.641011		1	2.46272e-05	5.22687e-05	0.599997	0.000744638	0.000744638	1	0.358989	0.942507	208600	0.011778	0		1.00002	0.897466	0.000744638	0.000790958	0.000746054	00:00:00	240003	2021-08-11			3.3209e+08	2021-04-09	0	1
2021-04-10	1.41916e+07	0		0	0.4	423.06	1122.37	2.12874e+08	65.2418	2.49998		0	2021-04-10	0.641003		1	2.38525e-05	5.06951e-05	0.599997	0.000743246	0.000743246	1	0.358997	0.942507	208900	0.011778	0		1.00002	0.897486	0.000743246	0.00078892	0.00074465	00:00:00	240004	2021-08-11			3.32095e+08	2021-04-10	0	1
2021-04-11	1.41917e+07	0		0	0.4	410.343	1088.61	2.12875e+08	63.2818	2.49998		0	2021-04-11	0.640995		1	2.31024e-05	4.91691e-05	0.599998	0.000741856	0.000741856	1	0.359005	0.942507	209200	0.011778	0		1.00002	0.897506	0.000741856	0.000786887	0.00074325	00:00:00	240005	2021-08-11			3.32101e+08	2021-04-11	0	1
2021-04-12	1.41917e+07	0		0	0.4	398.011	1055.86	2.12876e+08	61.381	2.49999		0	2021-04-12	0.640988		1	2.2376e-05	4.76894e-05	0.599998	0.00074047	0.00074047	1	0.359012	0.942507	209500	0.011778	0		1.00002	0.897526	0.00074047	0.000784861	0.000741853	00:00:00	240006	2021-08-11			3.32106e+08	2021-04-12	0	1
2021-04-13	1.41918e+07	0		0	0.4	386.052	1024.11	2.12877e+08	59.5376	2.49999		0	2021-04-13	0.64098		1	2.16726e-05	4.62545e-05	0.599998	0.000739086	0.000739086	1	0.35902	0.942507	209800	0.011778	0		1.00002	0.897547	0.000739086	0.00078284	0.00074046	00:00:00	240006	2021-08-11			3.32111e+08	2021-04-13	0	1
2021-04-14	1.41918e+07	0		0	0.4	374.455	993.319	2.12878e+08	57.75	2.49999		0	2021-04-14	0.640972		1	2.09916e-05	4.48631e-05	0.599998	0.000737706	0.000737706	1	0.359028	0.942507	210100	0.011778	0		1.00002	0.897567	0.000737706	0.000780826	0.000739069	00:00:00	240007	2021-08-11			3.32117e+08	2021-04-14	0	1
2021-04-15	1.41919e+07	0		0	0.4	363.209	963.459	2.12878e+08	56.0165	2.49999		0	2021-04-15	0.640964		1	2.03321e-05	4.35137e-05	0.599999	0.000736329	0.000736329	1	0.359036	0.942507	210400	0.011778	0		1.00002	0.897587	0.000736329	0.000778818	0.000737682	00:00:00	240008	2021-08-11			3.32122e+08	2021-04-15	0	1
2021-04-16	1.4192e+07	0		0	0.4	352.302	934.502	2.12879e+08	54.3353	2.49999		0	2021-04-16	0.640956		1	1.96934e-05	4.22052e-05	0.599999	0.000734956	0.000734956	1	0.359044	0.942507	210700	0.011778	0		1.00002	0.897608	0.000734956	0.000776816	0.000736298	00:00:00	240009	2021-08-11			3.32128e+08	2021-04-16	0	1
2021-04-17	1.4192e+07	0		0	0.4	341.725	906.422	2.1288e+08	52.7049	2.49999		0	2021-04-17	0.640948		1	1.9075e-05	4.09364e-05	0.599999	0.000733585	0.000733585	1	0.359052	0.942507	211000	0.011778	0		1.00002	0.897629	0.000733585	0.000774819	0.000734917	00:00:00	240009	2021-08-11			3.32133e+08	2021-04-17	0	1
2021-04-18	1.41921e+07	0		0	0.4	331.468	879.19	2.12881e+08	51.1238	2.49999		0	2021-04-18	0.640939		1	1.84762e-05	3.97059e-05	0.599999	0.000732217	0.000732217	1	0.359061	0.942507	211300	0.011778	0		1.00002	0.89765	0.000732217	0.000772829	0.000733539	00:00:00	240010	2021-08-11			3.32139e+08	2021-04-18	0	1
2021-04-19	1.41921e+07	0		0	0.4	321.521	852.783	2.12882e+08	49.5904	2.5		0	2021-04-19	0.640931		1	1.78963e-05	3.85126e-05	0.599999	0.000730853	0.000730853	1	0.359069	0.942507	211600	0.011778	0		1.00002	0.897671	0.000730853	0.000770845	0.000732165	00:00:00	240010	2021-08-11			3.32144e+08	2021-04-19	0	1
2021-04-20	1.41922e+07	0		0	0.4	311.874	827.173	2.12882e+08	48.1033	2.5		0	2021-04-20	0.640923		1	1.73348e-05	3.73554e-05	0.599999	0.000729492	0.000729492	1	0.359077	0.942507	211900	0.011778	0		1.00002	0.897692	0.000729492	0.000768867	0.000730793	00:00:00	240011	2021-08-11			3.3215e+08	2021-04-20	0	1
2021-04-21	1.41922e+07	0		0	0.4	302.519	802.338	2.12883e+08	46.6611	2.5		0	2021-04-21	0.640914		1	1.67911e-05	3.62333e-05	0.599999	0.000728134	0.000728134	1	0.359086	0.942507	212200	0.011778	0		1.00002	0.897713	0.000728134	0.000766894	0.000729425	00:00:00	240012	2021-08-11			3.32155e+08	2021-04-21	0	1
2021-04-22	1.41922e+07	0		0	0.4	293.446	778.253	2.12884e+08	45.2625	2.5		0	2021-04-22	0.640906		1	1.62645e-05	3.5145e-05	0.599999	0.000726778	0.000726778	1	0.359094	0.942507	212500	0.011778	0		1.00002	0.897734	0.000726778	0.000764928	0.00072806	00:00:00	240012	2021-08-11			3.32161e+08	2021-04-22	0	1
2021-04-23	1.41923e+07	0		0	0.4	284.647	754.896	2.12884e+08	43.9061	2.5		0	2021-04-23	0.640897		1	1.57546e-05	3.40897e-05	0.6	0.000725426	0.000725426	1	0.359103	0.942507	212800	0.011778	0		1.00002	0.897756	0.000725426	0.000762967	0.000726698	00:00:00	240013	2021-08-11			3.32166e+08	2021-04-23	0	1
2021-04-24	1.41923e+07	0		0	0.4	276.114	732.245	2.12885e+08	42.5906	2.5		0	2021-04-24	0.640889		1	1.52608e-05	3.30663e-05	0.6	0.000724077	0.000724077	1	0.359111	0.942507	213100	0.011778	0		1.00002	0.897778	0.000724077	0.000761012	0.000725339	00:00:00	240013	2021-08-11			3.32172e+08	2021-04-24	0	1
2021-04-25	1.41924e+07	0		0	0.4	267.839	710.278	2.12886e+08	41.3148	2.5		0	2021-04-25	0.64088		1	1.47826e-05	3.20738e-05	0.6	0.000722732	0.000722732	1	0.35912	0.942507	213400	0.011778	0		1.00002	0.897799	0.000722732	0.000759063	0.000723983	00:00:00	240014	2021-08-11			3.32177e+08	2021-04-25	0	1
2021-04-26	1.41924e+07	0		0	0.4	259.813	688.975	2.12886e+08	40.0776	2.5		0	2021-04-26	0.640871		1	1.43195e-05	3.11113e-05	0.6	0.000721389	0.000721389	1	0.359129	0.942507	213700	0.011778	0		1.00002	0.897821	0.000721389	0.00075712	0.00072263	00:00:00	240014	2021-08-11			3.32182e+08	2021-04-26	0	1
2021-04-27	1.41925e+07	0		0	0.4	252.029	668.314	2.12887e+08	38.8776	2.5		0	2021-04-27	0.640862		1	1.3871e-05	3.01778e-05	0.6	0.000720049	0.000720049	1	0.359138	0.942507	214000	0.011778	0		1.00002	0.897843	0.000720049	0.000755183	0.000721281	00:00:00	240015	2021-08-11			3.32188e+08	2021-04-27	0	1
2021-04-28	1.41925e+07	0		0	0.4	244.48	648.278	2.12887e+08	37.7138	2.5		0	2021-04-28	0.640854		1	1.34367e-05	2.92726e-05	0.6	0.000718712	0.000718712	1	0.359146	0.942507	214300	0.011778	0		1.00002	0.897866	0.000718712	0.000753251	0.000719934	00:00:00	240015	2021-08-11			3.32193e+08	2021-04-28	0	1
2021-04-29	1.41925e+07	0		0	0.4	237.159	628.847	2.12888e+08	36.5851	2.5		0	2021-04-29	0.640845		1	1.30161e-05	2.83947e-05	0.6	0.000717378	0.000717378	1	0.359155	0.942507	214600	0.011778	0		1.00002	0.897888	0.000717378	0.000751325	0.000718591	00:00:00	240016	2021-08-11			3.32199e+08	2021-04-29	0	1
2021-04-30	1.41926e+07	0		0	0.4	230.059	610.002	2.12888e+08	35.4904	2.5		0	2021-04-30	0.640836		1	1.26088e-05	2.75434e-05	0.6	0.000716048	0.000716048	1	0.359164	0.942507	214900	0.011778	0		1.00002	0.89791	0.000716048	0.000749405	0.00071725	00:00:00	240016	2021-08-11			3.32204e+08	2021-04-30	0	1
2021-05-01	1.41926e+07	0		0	0.4	219.994	588.547	2.12889e+08	31.2495	2.45312		0	2021-05-01	0.640827		1	1.20404e-05	2.65742e-05	0.559304	0.00071472	0.00071472	1	0.359173	0.942507	215200	0.011778	0		1.00003	0.881097	0.00071472	0.000747491	0.000715913	00:00:00	240016	2021-08-11			3.3221e+08	2021-05-01	0	0.925
2021-05-02	1.41926e+07	0		0	0.4	209.657	567.163	2.12889e+08	29.7403	2.44141		0	2021-05-02	0.640817		1	1.14586e-05	2.56082e-05	0.557189	0.000713395	0.000713395	1	0.359183	0.942507	215500	0.011778	0		1.00003	0.87691	0.000713395	0.000745582	0.000714578	00:00:00	240017	2021-08-11			3.32215e+08	2021-05-02	0	0.925
2021-05-03	1.41926e+07	0		0	0.4	198.953	545.746	2.1289e+08	28.1735	2.42676		0	2021-05-03	0.640808		1	1.08585e-05	2.46408e-05	0.554516	0.000712074	0.000712074	1	0.359192	0.942507	215800	0.011778	0		1.00003	0.871671	0.000712074	0.000743679	0.000713247	00:00:00	240017	2021-08-11			3.32221e+08	2021-05-03	0	0.925
2021-05-04	1.41927e+07	0		0	0.4	187.773	524.177	2.1289e+08	26.5341	2.40845		0	2021-05-04	0.640799		1	1.02341e-05	2.36666e-05	0.551129	0.000710755	0.000710755	1	0.359201	0.942507	216100	0.011778	0		1.00003	0.865117	0.000710755	0.000741781	0.000711919	00:00:00	240017	2021-08-11			3.32226e+08	2021-05-04	0	0.925
2021-05-05	1.41927e+07	0		0	0.4	176.115	502.443	2.12891e+08	24.9275	2.39728		0	2021-05-05	0.640789		1	9.58541e-06	2.26849e-05	0.549038	0.000709439	0.000709439	1	0.359211	0.942507	216400	0.011778	0		1.00003	0.861127	0.000709439	0.00073989	0.000710593	00:00:00	240018	2021-08-11			3.32232e+08	2021-05-05	0	0.925
2021-05-06	1.41927e+07	0		0	0.4	163.898	480.454	2.12891e+08	23.273	2.38625		0	2021-05-06	0.64078		1	8.9081e-06	2.16918e-05	0.546953	0.000708126	0.000708126	1	0.35922	0.942507	216700	0.011778	0		1.00003	0.857187	0.000708126	0.000738003	0.000709271	00:00:00	240018	2021-08-11			3.32237e+08	2021-05-06	0	0.925
2021-05-07	1.41927e+07	0		0	0.4	154.215	458.115	2.12891e+08	21.5671	2.37612		0	2021-05-07	0.64077		1	8.37026e-06	2.06829e-05	0.545022	0.000706816	0.000706816	1	0.35923	0.942507	217000	0.011778	0		1.00003	0.853572	0.000706816	0.000736123	0.000707952	00:00:00	240018	2021-08-11			3.32243e+08	2021-05-07	0	0.925
2021-05-08	1.41928e+07	0		0	0.4	144.7	435.749	2.12891e+08	20.2245	2.36803		0	2021-05-08	0.640761		1	7.84294e-06	1.96728e-05	0.543469	0.00070551	0.00070551	1	0.359239	0.942507	217300	0.011778	0		1.00003	0.850691	0.00070551	0.000734247	0.000706635	00:00:00	240019	2021-08-11			3.32248e+08	2021-05-08	0	0.925
2021-05-09	1.41928e+07	0		0	0.4	135.445	413.352	2.12892e+08	18.9185	2.36072		0	2021-05-09	0.640751		1	7.33119e-06	1.86613e-05	0.542055	0.000704206	0.000704206	1	0.359249	0.942507	217600	0.011778	0		1.00003	0.848088	0.000704206	0.000732378	0.000705322	00:00:00	240019	2021-08-11			3.32253e+08	2021-05-09	0	0.925
2021-05-10	1.41928e+07	0		0	0.4	126.572	390.936	2.12892e+08	17.6611	2.35434		0	2021-05-10	0.640741		1	6.84149e-06	1.7649e-05	0.540814	0.000702905	0.000702905	1	0.359259	0.942507	217900	0.011778	0		1.00003	0.845818	0.000702905	0.000730514	0.000704011	00:00:00	240019	2021-08-11			3.32259e+08	2021-05-10	0	0.925
2021-05-11	1.41928e+07	0		0	0.4	118.111	368.525	2.12892e+08	16.4664	2.3489		0	2021-05-11	0.640732		1	6.37537e-06	1.6637e-05	0.53975	0.000701606	0.000701606	1	0.359268	0.942507	218200	0.011778	0		1.00003	0.843886	0.000701606	0.000728655	0.000702704	00:00:00	240019	2021-08-11			3.32264e+08	2021-05-11	0	0.925
2021-05-12	1.41928e+07	0		0	0.4	110.172	346.146	2.12893e+08	15.3348	2.34412		0	2021-05-12	0.640722		1	5.93872e-06	1.56264e-05	0.538811	0.000700311	0.000700311	1	0.359278	0.942507	218500	0.011778	0		1.00003	0.84219	0.000700311	0.000726802	0.000701399	00:00:00	240019	2021-08-11			3.3227e+08	2021-05-12	0	0.925
2021-05-13	1.41928e+07	0		0	0.4	102.885	323.84	2.12893e+08	14.2792	2.33997		0	2021-05-13	0.640712		1	5.53827e-06	1.46192e-05	0.537993	0.000699019	0.000699019	1	0.359288	0.942507	218800	0.011778	0		1.00003	0.840722	0.000699019	0.000724954	0.000700098	00:00:00	240020	2021-08-11			3.32275e+08	2021-05-13	0	0.925
2021-05-14	1.41929e+07	0		0	0.4	95.9746	301.664	2.12893e+08	13.3145	2.33637		0	2021-05-14	0.640702		1	5.15923e-06	1.36179e-05	0.537282	0.00069773	0.00069773	1	0.359298	0.942507	219100	0.011778	0		1.00003	0.839454	0.00069773	0.000723112	0.000698799	00:00:00	240020	2021-08-11			3.32281e+08	2021-05-14	0	0.925
2021-05-15	1.41929e+07	0		0	0.4	89.46	282.819	2.12893e+08	12.404	2.33324		0	2021-05-15	0.640692		1	4.80246e-06	1.27669e-05	0.536661	0.000696443	0.000696443	1	0.359308	0.942507	219400	0.011778	0		1.00003	0.838351	0.000696443	0.000721275	0.000697503	00:00:00	240020	2021-08-11			3.32286e+08	2021-05-15	0	0.925
2021-05-16	1.41929e+07	0		0	0.4	83.3478	264.627	2.12893e+08	11.5489	2.33052		0	2021-05-16	0.640682		1	4.46822e-06	1.19455e-05	0.53612	0.000695159	0.000695159	1	0.359318	0.942507	219700	0.011778	0		1.00003	0.837397	0.000695159	0.000719444	0.000696211	00:00:00	240020	2021-08-11			3.32292e+08	2021-05-16	0	0.925
2021-05-17	1.41929e+07	0		0	0.4	77.6305	247.203	2.12893e+08	10.7492	2.32816		0	2021-05-17	0.640672		1	4.15605e-06	1.11588e-05	0.535649	0.000693879	0.000693879	1	0.359328	0.942507	220000	0.011778	0		1.00003	0.836572	0.000693879	0.000717618	0.000694921	00:00:00	240020	2021-08-11			3.32297e+08	2021-05-17	0	0.925
2021-05-18	1.41929e+07	0		0	0.4	72.299	230.672	2.12894e+08	10.0033	2.3261		0	2021-05-18	0.640662		1	3.86535e-06	1.04124e-05	0.535239	0.000692601	0.000692601	1	0.359338	0.942507	220300	0.011778	0		1.00003	0.835858	0.000692601	0.000715797	0.000693634	00:00:00	240020	2021-08-11			3.32303e+08	2021-05-18	0	0.925
2021-05-19	1.41929e+07	0		0	0.4	67.3292	215.054	2.12894e+08	9.30941	2.32432		0	2021-05-19	0.640652		1	3.59475e-06	9.70728e-06	0.534883	0.000691326	0.000691326	1	0.359348	0.942507	220600	0.011778	0		1.00003	0.83524	0.000691326	0.000713981	0.000692349	00:00:00	240020	2021-08-11			3.32308e+08	2021-05-19	0	0.925
2021-05-20	1.41929e+07	0		0	0.4	62.6787	200.445	2.12894e+08	8.66395	2.32277		0	2021-05-20	0.640642		1	3.34191e-06	9.0477e-06	0.534573	0.000690053	0.000690053	1	0.359358	0.942507	220900	0.011778	0		1.00003	0.834707	0.000690053	0.000712171	0.000691068	00:00:00	240021	2021-08-11			3.32314e+08	2021-05-20	0	0.925
2021-05-21	1.41929e+07	0		0	0.4	58.3358	186.939	2.12894e+08	8.06107	2.32142		0	2021-05-21	0.640631		1	3.10614e-06	8.43793e-06	0.534302	0.000688784	0.000688784	1	0.359369	0.942507	221200	0.011778	0		1.00003	0.834247	0.000688784	0.000710367	0.00068979	00:00:00	240021	2021-08-11			3.32319e+08	2021-05-21	0	0.925
2021-05-22	1.41929e+07	0		0	0.4	54.2859	174.213	2.12894e+08	7.49896	2.32025		0	2021-05-22	0.640621		1	2.88658e-06	7.8634e-06	0.534068	0.000687518	0.000687518	1	0.359379	0.942507	221500	0.011778	0		1.00003	0.83385	0.000687518	0.000708567	0.000688514	00:00:00	240021	2021-08-11			3.32324e+08	2021-05-22	0	0.925
2021-05-23	1.41929e+07	0		0	0.4	50.5122	162.27	2.12894e+08	6.97549	2.31924		0	2021-05-23	0.640611		1	2.68229e-06	7.32421e-06	0.533863	0.000686254	0.000686254	1	0.359389	0.942507	221800	0.011778	0		1.00003	0.833508	0.000686254	0.000706773	0.000687242	00:00:00	240021	2021-08-11			3.3233e+08	2021-05-23	0	0.925
2021-05-24	1.4193e+07	0		0	0.4	46.9972	151.097	2.12894e+08	6.4883	2.31835		0	2021-05-24	0.640601		1	2.49227e-06	6.8198e-06	0.533686	0.000684993	0.000684993	1	0.359399	0.942507	222100	0.011778	0		1.00003	0.833214	0.000684993	0.000704984	0.000685972	00:00:00	240021	2021-08-11			3.32335e+08	2021-05-24	0	0.925
2021-05-25	1.4193e+07	0		0	0.4	43.7227	140.666	2.12894e+08	6.03497	2.31759		0	2021-05-25	0.640591		1	2.31549e-06	6.34887e-06	0.533531	0.000683735	0.000683735	1	0.359409	0.942507	222400	0.011778	0		1.00003	0.832962	0.000683735	0.0007032	0.000684705	00:00:00	240021	2021-08-11			3.32341e+08	2021-05-25	0	0.925
2021-05-26	1.4193e+07	0		0	0.4	40.6718	130.944	2.12894e+08	5.61304	2.31692		0	2021-05-26	0.64058		1	2.15102e-06	5.90999e-06	0.533397	0.000682479	0.000682479	1	0.35942	0.942507	222700	0.011778	0		1.00003	0.832746	0.000682479	0.000701421	0.000683441	00:00:00	240021	2021-08-11			3.32346e+08	2021-05-26	0	0.925
2021-05-27	1.4193e+07	0		0	0.4	37.831	121.885	2.12895e+08	5.22022	2.31634		0	2021-05-27	0.64057		1	1.99808e-06	5.50103e-06	0.53328	0.000681227	0.000681227	1	0.35943	0.942507	223000	0.011778	0		1.00003	0.832562	0.000681227	0.000699648	0.000682179	00:00:00	240021	2021-08-11			3.32352e+08	2021-05-27	0	0.925
2021-05-28	1.4193e+07	0		0	0.4	35.1867	113.425	2.12895e+08	4.85468	2.31584		0	2021-05-28	0.64056		1	1.85593e-06	5.11913e-06	0.533179	0.000679977	0.000679977	1	0.35944	0.942507	223300	0.011778	0		1.00003	0.832405	0.000679977	0.00069788	0.000680921	00:00:00	240021	2021-08-11			3.32357e+08	2021-05-28	0	0.925
2021-05-29	1.4193e+07	0		0	0.4	32.7258	105.536	2.12895e+08	4.51462	2.3154		0	2021-05-29	0.640549		1	1.72381e-06	4.76299e-06	0.533091	0.00067873	0.00067873	1	0.359451	0.942507	223600	0.011778	0		1.00003	0.832272	0.00067873	0.000696117	0.000679665	00:00:00	240021	2021-08-11			3.32363e+08	2021-05-29	0	0.925
2021-05-30	1.4193e+07	0		0	0.4	30.4358	98.1855	2.12895e+08	4.19831	2.31502		0	2021-05-30	0.640539		1	1.60104e-06	4.43118e-06	0.533014	0.000677486	0.000677486	1	0.359461	0.942507	223900	0.011778	0		1.00003	0.832159	0.000677486	0.000694359	0.000678412	00:00:00	240021	2021-08-11			3.32368e+08	2021-05-30	0	0.925
2021-05-31	1.4193e+07	0		0	0.4	28.305	91.3404	2.12895e+08	3.90409	2.31469		0	2021-05-31	0.640529		1	1.48696e-06	4.12219e-06	0.532947	0.000676245	0.000676245	1	0.359471	0.942507	224200	0.011778	0		1.00003	0.832064	0.000676245	0.000692606	0.000677162	00:00:00	240021	2021-08-11			3.32374e+08	2021-05-31	0	0.925
2021-06-01	1.4193e+07	0		0	0.4	25.9604	84.6056	2.12895e+08	3.26849	2.26753		0	2021-06-01	0.640518		1	1.36197e-06	3.81818e-06	0.481166	0.000675006	0.000675006	1	0.359482	0.942507	224500	0.011778	0		1.00003	0.815134	0.000675006	0.000690858	0.000675915	00:00:00	240021	2021-08-11			3.32379e+08	2021-06-01	0	0.85
2021-06-02	1.4193e+07	0		0	0.4	23.7222	78.2782	2.12895e+08	2.98202	2.25556		0	2021-06-02	0.640508		1	1.24288e-06	3.53257e-06	0.478413	0.00067377	0.00067377	1	0.359492	0.942507	224800	0.011778	0		1.00003	0.810856	0.00067377	0.000689115	0.00067467	00:00:00	240021	2021-08-11			3.32385e+08	2021-06-02	0	0.85
2021-06-03	1.4193e+07	0		0	0.4	21.5746	72.3213	2.12895e+08	2.70704	2.24069		0	2021-06-03	0.640497		1	1.12885e-06	3.26369e-06	0.474952	0.000672537	0.000672537	1	0.359503	0.942507	225100	0.011778	0		1.00003	0.805535	0.000672537	0.000687378	0.000673428	00:00:00	240021	2021-08-11			3.3239e+08	2021-06-03	0	0.85
2021-06-04	1.4193e+07	0		0	0.4	19.5017	66.702	2.12895e+08	2.44171	2.22219		0	2021-06-04	0.640487		1	1.01903e-06	3.01006e-06	0.470582	0.000671306	0.000671306	1	0.359513	0.942507	225400	0.011778	0		1.00003	0.798908	0.000671306	0.000685645	0.000672189	00:00:00	240021	2021-08-11			3.32395e+08	2021-06-04	0	0.85
2021-06-05	1.4193e+07	0		0	0.4	17.4993	61.3989	2.12895e+08	2.19592	2.21086		0	2021-06-05	0.640477		1	9.13186e-07	2.7707e-06	0.467868	0.000670078	0.000670078	1	0.359523	0.942507	225700	0.011778	0		1.00003	0.794857	0.000670078	0.000683917	0.000670953	00:00:00	240022	2021-08-11			3.32401e+08	2021-06-05	0	0.85
2021-06-06	1.4193e+07	0		0	0.4	15.5557	56.384	2.12895e+08	1.96054	2.19969		0	2021-06-06	0.640466		1	8.10686e-07	2.54435e-06	0.465165	0.000668853	0.000668853	1	0.359534	0.942507	226000	0.011778	0		1.00003	0.790862	0.000668853	0.000682195	0.000669719	00:00:00	240022	2021-08-11			3.32406e+08	2021-06-06	0	0.85
2021-06-07	1.4193e+07	0		0	0.4	14.0219	51.6304	2.12895e+08	1.73472	2.18944		0	2021-06-07	0.640456		1	7.29785e-07	2.32981e-06	0.46266	0.000667631	0.000667631	1	0.359544	0.942507	226300	0.011778	0		1.00003	0.787199	0.000667631	0.000680477	0.000668488	00:00:00	240022	2021-08-11			3.32412e+08	2021-06-07	0	0.85
2021-06-08	1.4193e+07	0		0	0.4	12.5978	47.1533	2.12895e+08	1.55788	2.18125		0	2021-06-08	0.640445		1	6.54796e-07	2.12774e-06	0.460643	0.000666411	0.000666411	1	0.359555	0.942507	226600	0.011778	0		1.00003	0.784277	0.000666411	0.000678764	0.00066726	00:00:00	240022	2021-08-11			3.32417e+08	2021-06-08	0	0.85
2021-06-09	1.4193e+07	0		0	0.4	11.2857	42.9352	2.12895e+08	1.39494	2.17384		0	2021-06-09	0.640435		1	5.85821e-07	1.93738e-06	0.458806	0.000665194	0.000665194	1	0.359565	0.942507	226900	0.011778	0		1.00003	0.781638	0.000665194	0.000677057	0.000666035	00:00:00	240022	2021-08-11			3.32423e+08	2021-06-09	0	0.85
2021-06-10	1.4193e+07	0		0	0.4	10.09	38.9609	2.12895e+08	1.24597	2.16738		0	2021-06-10	0.640424		1	5.23061e-07	1.75802e-06	0.457193	0.00066398	0.00066398	1	0.359576	0.942507	227200	0.011778	0		1.00003	0.779338	0.00066398	0.000675354	0.000664812	00:00:00	240022	2021-08-11			3.32428e+08	2021-06-10	0	0.85
2021-06-11	1.4193e+07	0		0	0.4	9.00521	35.2174	2.12895e+08	1.11116	2.16187		0	2021-06-11	0.640414		1	4.66212e-07	1.58907e-06	0.455808	0.000662768	0.000662768	1	0.359586	0.942507	227500	0.011778	0		1.00003	0.777378	0.000662768	0.000673656	0.000663592	00:00:00	240022	2021-08-11			3.32434e+08	2021-06-11	0	0.85
2021-06-12	1.4193e+07	0		0	0.4	8.03418	31.6923	2.12895e+08	0.989508	2.15702		0	2021-06-12	0.640403		1	4.15393e-07	1.42999e-06	0.454586	0.000661559	0.000661559	1	0.359597	0.942507	227800	0.011778	0		1.00003	0.775658	0.000661559	0.000671963	0.000662375	00:00:00	240022	2021-08-11			3.32439e+08	2021-06-12	0	0.85
2021-06-13	1.4193e+07	0		0	0.4	7.18057	28.3751	2.12895e+08	0.881114	2.15282		0	2021-06-13	0.640393		1	3.7077e-07	1.28029e-06	0.453521	0.000660353	0.000660353	1	0.359607	0.942507	228100	0.011778	0		1.00003	0.774169	0.000660353	0.000670275	0.00066116	00:00:00	240022	2021-08-11			3.32445e+08	2021-06-13	0	0.85
2021-06-14	1.4193e+07	0		0	0.4	6.40889	25.2572	2.12895e+08	0.78619	2.14918		0	2021-06-14	0.640382		1	3.30489e-07	1.13959e-06	0.452595	0.000659149	0.000659149	1	0.359618	0.942507	228400	0.011778	0		1.00003	0.772882	0.000659149	0.000668591	0.000659948	00:00:00	240022	2021-08-11			3.3245e+08	2021-06-14	0	0.85
2021-06-15	1.4193e+07	0		0	0.4	5.71463	22.6894	2.12895e+08	0.700684	2.146		0	2021-06-15	0.640372		1	2.94302e-07	1.02372e-06	0.451786	0.000657948	0.000657948	1	0.359628	0.942507	228700	0.011778	0		1.00003	0.771764	0.000657948	0.000666913	0.000658739	00:00:00	240022	2021-08-11			3.32456e+08	2021-06-15	0	0.85
2021-06-16	1.4193e+07	0		0	0.4	5.09265	20.3314	2.12895e+08	0.623997	2.14325		0	2021-06-16	0.640361		1	2.61927e-07	9.17312e-07	0.451081	0.000656749	0.000656749	1	0.359639	0.942507	229000	0.011778	0		1.00003	0.770795	0.000656749	0.000665239	0.000657532	00:00:00	240022	2021-08-11			3.32461e+08	2021-06-16	0	0.85
2021-06-17	1.4193e+07	0		0	0.4	4.53697	18.1798	2.12895e+08	0.555477	2.14086		0	2021-06-17	0.640351		1	2.33041e-07	8.20224e-07	0.450468	0.000655554	0.000655554	1	0.359649	0.942507	229300	0.011778	0		1.00003	0.769958	0.000655554	0.000663571	0.000656328	00:00:00	240022	2021-08-11			3.32467e+08	2021-06-17	0	0.85
2021-06-18	1.4193e+07	0		0	0.4	4.04186	16.2325	2.12895e+08	0.4944	2.13878		0	2021-06-18	0.64034		1	2.07339e-07	7.32355e-07	0.449933	0.00065436	0.00065436	1	0.35966	0.942507	229600	0.011778	0		1.00003	0.769232	0.00065436	0.000661907	0.000655127	00:00:00	240022	2021-08-11			3.32472e+08	2021-06-18	0	0.85
2021-06-19	1.4193e+07	0		0	0.4	3.60083	14.4767	2.12895e+08	0.440088	2.13697		0	2021-06-19	0.64033		1	1.84474e-07	6.53127e-07	0.449468	0.00065317	0.00065317	1	0.35967	0.942507	229900	0.011778	0		1.00003	0.768605	0.00065317	0.000660247	0.000653928	00:00:00	240022	2021-08-11			3.32477e+08	2021-06-19	0	0.85
2021-06-20	1.4193e+07	0		0	0.4	3.20644	12.9079	2.12895e+08	0.391791	2.1354		0	2021-06-20	0.640319		1	1.64055e-07	5.82342e-07	0.449064	0.000651982	0.000651982	1	0.359681	0.942507	230200	0.011778	0		1.00003	0.768063	0.000651982	0.000658593	0.000652732	00:00:00	240022	2021-08-11			3.32483e+08	2021-06-20	0	0.85
2021-06-21	1.4193e+07	0		0	0.4	2.85442	11.5219	2.12895e+08	0.348666	2.13404		0	2021-06-21	0.640309		1	1.45854e-07	5.19802e-07	0.448711	0.000650797	0.000650797	1	0.359691	0.942507	230500	0.011778	0		1.00003	0.767595	0.000650797	0.000656943	0.000651539	00:00:00	240022	2021-08-11			3.32488e+08	2021-06-21	0	0.85
2021-06-22	1.4193e+07	0		0	0.4	2.54065	10.2742	2.12895e+08	0.310224	2.13285		0	2021-06-22	0.640298		1	1.29652e-07	4.63507e-07	0.448405	0.000649614	0.000649614	1	0.359702	0.942507	230800	0.011778	0		1.00003	0.767191	0.000649614	0.000655298	0.000650348	00:00:00	240022	2021-08-11			3.32494e+08	2021-06-22	0	0.85
2021-06-23	1.4193e+07	0		0	0.4	2.26117	9.15527	2.12895e+08	0.275998	2.13182		0	2021-06-23	0.640288		1	1.1524e-07	4.13021e-07	0.448139	0.000648433	0.000648433	1	0.359712	0.942507	231100	0.011778	0		1.00003	0.766843	0.000648433	0.000653658	0.00064916	00:00:00	240022	2021-08-11			3.32499e+08	2021-06-23	0	0.85
2021-06-24	1.4193e+07	0		0	0.4	2.01231	8.15484	2.12895e+08	0.245541	2.13093		0	2021-06-24	0.640277		1	1.02424e-07	3.67882e-07	0.447907	0.000647256	0.000647256	1	0.359723	0.942507	231400	0.011778	0		1.00003	0.766543	0.000647256	0.000652022	0.000647974	00:00:00	240022	2021-08-11			3.32505e+08	2021-06-24	0	0.85
2021-06-25	1.4193e+07	0		0	0.4	1.79066	7.26212	2.12895e+08	0.218444	2.13015		0	2021-06-25	0.640267		1	9.10247e-08	3.27604e-07	0.447706	0.000646081	0.000646081	1	0.359733	0.942507	231700	0.011778	0		1.00003	0.766286	0.000646081	0.000650391	0.000646791	00:00:00	240022	2021-08-11			3.3251e+08	2021-06-25	0	0.85
2021-06-26	1.4193e+07	0		0	0.4	1.5932	6.46694	2.12895e+08	0.194328	2.12948		0	2021-06-26	0.640256		1	8.08823e-08	2.91728e-07	0.44753	0.000644908	0.000644908	1	0.359744	0.942507	232000	0.011778	0		1.00003	0.766066	0.000644908	0.000648765	0.000645611	00:00:00	240022	2021-08-11			3.32516e+08	2021-06-26	0	0.85
2021-06-27	1.4193e+07	0		0	0.4	1.41739	5.75868	2.12895e+08	0.172856	2.12889		0	2021-06-27	0.640246		1	7.1864e-08	2.59774e-07	0.447378	0.000643738	0.000643738	1	0.359754	0.942507	232300	0.011778	0		1.00003	0.765877	0.000643738	0.000647143	0.000644433	00:00:00	240022	2021-08-11			3.32521e+08	2021-06-27	0	0.85
2021-06-28	1.4193e+07	0		0	0.4	1.26092	5.12624	2.12895e+08	0.153749	2.12838		0	2021-06-28	0.640235		1	6.3848e-08	2.31241e-07	0.447246	0.000642571	0.000642571	1	0.359765	0.942507	232600	0.011778	0		1.00003	0.765716	0.000642571	0.000645526	0.000643258	00:00:00	240022	2021-08-11			3.32527e+08	2021-06-28	0	0.85
2021-06-29	1.4193e+07	0		0	0.4	1.12167	4.56231	2.12895e+08	0.136751	2.12794		0	2021-06-29	0.640225		1	5.67239e-08	2.05799e-07	0.447131	0.000641406	0.000641406	1	0.359775	0.942507	232900	0.011778	0		1.00003	0.765579	0.000641406	0.000643914	0.000642085	00:00:00	240022	2021-08-11			3.32532e+08	2021-06-29	0	0.85
2021-06-30	1.4193e+07	0		0	0.4	0.997759	4.05994	2.12895e+08	0.121631	2.12755		0	2021-06-30	0.640214		1	5.03928e-08	1.83135e-07	0.447031	0.000640244	0.000640244	1	0.359786	0.942507	233200	0.011778	0		1.00003	0.765463	0.000640244	0.000642306	0.000640915	00:00:00	240022	2021-08-11			3.32538e+08	2021-06-30	0	0.85
2021-07-01	1.4193e+07	0		0	0.4	0.887496	3.61265	2.12895e+08	0.108181	2.12722		0	2021-07-01	0.640204		1	4.47662e-08	1.62956e-07	0.446944	0.000639084	0.000639084	1	0.359796	0.942507	233500	0.011778	0		1.00003	0.765365	0.000639084	0.000640702	0.000639747	00:00:00	240022	2021-08-11			3.32543e+08	2021-07-01	0	0.85
2021-07-02	1.4193e+07	0		0	0.4	0.789383	3.21446	2.12895e+08	0.096215	2.12693		0	2021-07-02	0.640193		1	3.97662e-08	1.44992e-07	0.446868	0.000637926	0.000637926	1	0.359807	0.942507	233800	0.011778	0		1.00003	0.765282	0.000637926	0.000639104	0.000638582	00:00:00	240022	2021-08-11			3.32549e+08	2021-07-02	0	0.85
2021-07-03	1.4193e+07	0		0	0.4	0.702097	2.85995	2.12895e+08	0.0855708	2.12667		0	2021-07-03	0.640183		1	3.53238e-08	1.28999e-07	0.446802	0.000636772	0.000636772	1	0.359817	0.942507	234100	0.011778	0		1.00003	0.765214	0.000636772	0.00063751	0.00063742	00:00:00	240022	2021-08-11			3.32554e+08	2021-07-03	0	0.85
2021-07-04	1.4193e+07	0		0	0.4	0.624452	2.54426	2.12895e+08	0.0761032	2.12645		0	2021-07-04	0.640172		1	3.13771e-08	1.14758e-07	0.446745	0.000635619	0.000635619	1	0.359828	0.942507	234400	0.011778	0		1.00003	0.765157	0.000635619	0.00063592	0.00063626	00:00:00	240022	2021-08-11			3.32559e+08	2021-07-04	0	0.85
2021-07-05	1.4193e+07	0		0	0.4	0.555383	2.26327	2.12895e+08	0.0676828	2.12626		0	2021-07-05	0.640162		1	2.78709e-08	1.02083e-07	0.446696	0.000634469	0.000634469	1	0.359838	0.942507	234700	0.011778	0		1.00003	0.765111	0.000634469	0.000634335	0.000635103	00:00:00	240022	2021-08-11			3.32565e+08	2021-07-05	0	0.85
2021-07-06	1.4193e+07	0		0	0.4	0.493946	2.01324	2.12895e+08	0.0601937	2.1261		0	2021-07-06	0.640151		1	2.47561e-08	9.08038e-08	0.446653	0.000633322	0.000633322	1	0.359849	0.942507	235000	0.011778	0		1.00003	0.765074	0.000633322	0.000632754	0.000633948	00:00:00	240022	2021-08-11			3.3257e+08	2021-07-06	0	0.85
2021-07-07	1.4193e+07	0		0	0.4	0.439299	1.79078	2.12895e+08	0.053533	2.12595		0	2021-07-07	0.640141		1	2.19892e-08	8.07686e-08	0.446615	0.000632177	0.000632177	1	0.359859	0.942507	235300	0.011778	0		1.00003	0.765045	0.000632177	0.000631178	0.000632795	00:00:00	240022	2021-08-11			3.32576e+08	2021-07-07	0	0.85
2021-07-08	1.4193e+07	0		0	0.4	0.390692	1.59285	2.12895e+08	0.0476089	2.12583		0	2021-07-08	0.64013		1	1.95313e-08	7.18402e-08	0.446583	0.000631035	0.000631035	1	0.35987	0.942507	235600	0.011778	0		1.00003	0.765022	0.000631035	0.000629606	0.000631645	00:00:00	240022	2021-08-11			3.32581e+08	2021-07-08	0	0.85
2021-07-09	1.4193e+07	0		0	0.4	0.347462	1.41674	2.12895e+08	0.0423403	2.12572		0	2021-07-09	0.64012		1	1.7348e-08	6.38966e-08	0.446554	0.000629895	0.000629895	1	0.35988	0.942507	235900	0.011778	0		1.00003	0.765005	0.000629895	0.000628039	0.000630498	00:00:00	240022	2021-08-11			3.32587e+08	2021-07-09	0	0.85
2021-07-10	1.4193e+07	0		0	0.4	0.309014	1.26007	2.12895e+08	0.0376548	2.12563		0	2021-07-10	0.640109		1	1.54088e-08	5.68295e-08	0.44653	0.000628758	0.000628758	1	0.359891	0.942507	236200	0.011778	0		1.00003	0.764994	0.000628758	0.000626476	0.000629353	00:00:00	240022	2021-08-11			3.32592e+08	2021-07-10	0	0.85
2021-07-11	1.4193e+07	0		0	0.4	0.274818	1.1207	2.12895e+08	0.0334878	2.12554		0	2021-07-11	0.640098		1	1.36863e-08	5.05431e-08	0.446508	0.000627623	0.000627623	1	0.359902	0.942507	236500	0.011778	0		1.00003	0.764986	0.000627623	0.000624918	0.000628211	00:00:00	240022	2021-08-11			3.32598e+08	2021-07-11	0	0.85
2021-07-12	1.4193e+07	0		0	0.4	0.244407	0.996735	2.12895e+08	0.0297819	2.12547		0	2021-07-12	0.640088		1	1.21563e-08	4.49515e-08	0.44649	0.00062649	0.00062649	1	0.359912	0.942507	236800	0.011778	0		1.00003	0.764983	0.00062649	0.000623364	0.000627071	00:00:00	240022	2021-08-11			3.32603e+08	2021-07-12	0	0.85
2021-07-13	1.4193e+07	0		0	0.4	0.21736	0.88647	2.12895e+08	0.0264862	2.12541		0	2021-07-13	0.640077		1	1.07974e-08	3.99781e-08	0.446474	0.00062536	0.00062536	1	0.359923	0.942507	237100	0.011778	0		1.00003	0.764983	0.00062536	0.000621814	0.000625933	00:00:00	240022	2021-08-11			3.32609e+08	2021-07-13	0	0.85
2021-07-14	1.4193e+07	0		0	0.4	0.193306	0.788394	2.12895e+08	0.0235553	2.12536		0	2021-07-14	0.640067		1	9.59039e-09	3.55545e-08	0.44646	0.000624232	0.000624232	1	0.359933	0.942507	237400	0.011778	0		1.00003	0.764986	0.000624232	0.000620269	0.000624798	00:00:00	240022	2021-08-11			3.32614e+08	2021-07-14	0	0.85
2021-07-15	1.4193e+07	0		0	0.4	0.171915	0.701162	2.12895e+08	0.0209487	2.12531		0	2021-07-15	0.640056		1	8.51834e-09	3.162e-08	0.446447	0.000623107	0.000623107	1	0.359944	0.942507	237700	0.011778	0		1.00003	0.764992	0.000623107	0.000618728	0.000623665	00:00:00	240022	2021-08-11			3.3262e+08	2021-07-15	0	0.85
2021-07-16	1.4193e+07	0		0	0.4	0.152891	0.623578	2.12895e+08	0.0186307	2.12527		0	2021-07-16	0.640046		1	7.56615e-09	2.81208e-08	0.446437	0.000621984	0.000621984	1	0.359954	0.942507	238000	0.011778	0		1.00003	0.764999	0.000621984	0.000617192	0.000622535	00:00:00	240022	2021-08-11			3.32625e+08	2021-07-16	0	0.85
2021-07-17	1.4193e+07	0		0	0.4	0.135972	0.554577	2.12895e+08	0.0165692	2.12523		0	2021-07-17	0.640035		1	6.72042e-09	2.50087e-08	0.446428	0.000620864	0.000620864	1	0.359965	0.942507	238300	0.011778	0		1.00003	0.765009	0.000620864	0.00061566	0.000621408	00:00:00	240022	2021-08-11			3.32631e+08	2021-07-17	0	0.85
2021-07-18	1.4193e+07	0		0	0.4	0.120926	0.493209	2.12895e+08	0.0147359	2.1252		0	2021-07-18	0.640025		1	5.96926e-09	2.22409e-08	0.44642	0.000619746	0.000619746	1	0.359975	0.942507	238600	0.011778	0		1.00003	0.76502	0.000619746	0.000614132	0.000620282	00:00:00	240022	2021-08-11			3.32636e+08	2021-07-18	0	0.85
2021-07-19	1.4193e+07	0		0	0.4	0.107545	0.438632	2.12895e+08	0.0131055	2.12518		0	2021-07-19	0.640014		1	5.30209e-09	1.97795e-08	0.446413	0.00061863	0.00061863	1	0.359986	0.942507	238900	0.011778	0		1.00003	0.765033	0.00061863	0.000612608	0.000619159	00:00:00	240022	2021-08-11			3.32641e+08	2021-07-19	0	0.85
2021-07-20	1.4193e+07	0		0	0.4	0.0956457	0.390094	2.12895e+08	0.0116556	2.12515		0	2021-07-20	0.640004		1	4.70951e-09	1.75905e-08	0.446407	0.000617517	0.000617517	1	0.359996	0.942507	239200	0.011778	0		1.00003	0.765047	0.000617517	0.000611089	0.000618039	00:00:00	240022	2021-08-11			3.32647e+08	2021-07-20	0	0.85
2021-07-21	1.4193e+07	0		0	0.4	0.0850632	0.346927	2.12895e+08	0.0103661	2.12513		0	2021-07-21	0.639993		1	4.18318e-09	1.56437e-08	0.446402	0.000616406	0.000616406	1	0.360007	0.942507	239500	0.011778	0		1.00003	0.765062	0.000616406	0.000609574	0.000616921	00:00:00	240022	2021-08-11			3.32652e+08	2021-07-21	0	0.85
2021-07-22	1.4193e+07	0		0	0.4	0.0756519	0.308538	2.12895e+08	0.0092194	2.12512		0	2021-07-22	0.639983		1	3.71571e-09	1.39124e-08	0.446397	0.000615298	0.000615298	1	0.360017	0.942507	239800	0.011778	0		1.00003	0.765078	0.000615298	0.000608063	0.000615805	00:00:00	240022	2021-08-11			3.32658e+08	2021-07-22	0	0.85
2021-07-23	1.4193e+07	0		0	0.4	0.0672822	0.274397	2.12895e+08	0.00819955	2.1251		0	2021-07-23	0.639972		1	3.30049e-09	1.23727e-08	0.446393	0.000614191	0.000614191	1	0.360028	0.942507	240100	0.011778	0		1.00003	0.765095	0.000614191	0.000606557	0.000614692	00:00:00	240022	2021-08-11			3.32663e+08	2021-07-23	0	0.85
2021-07-24	1.4193e+07	0		0	0.4	0.0598388	0.244035	2.12895e+08	0.00729257	2.12509		0	2021-07-24	0.639962		1	2.9317e-09	1.10035e-08	0.44639	0.000613088	0.000613088	1	0.360038	0.942507	240400	0.011778	0		1.00003	0.765113	0.000613088	0.000605054	0.000613581	00:00:00	240022	2021-08-11			3.32669e+08	2021-07-24	0	0.85
2021-07-25	1.4193e+07	0		0	0.4	0.0532192	0.217033	2.12895e+08	0.00648595	2.12508		0	2021-07-25	0.639951		1	2.60414e-09	9.78582e-09	0.446387	0.000611986	0.000611986	1	0.360049	0.942507	240700	0.011778	0		1.00003	0.765131	0.000611986	0.000603556	0.000612473	00:00:00	240022	2021-08-11			3.32674e+08	2021-07-25	0	0.85
2021-07-26	1.4193e+07	0		0	0.4	0.0473322	0.193019	2.12895e+08	0.0057686	2.12507		0	2021-07-26	0.639941		1	2.31319e-09	8.70294e-09	0.446384	0.000610887	0.000610887	1	0.360059	0.942507	241000	0.011778	0		1.00003	0.76515	0.000610887	0.000602062	0.000611367	00:00:00	240022	2021-08-11			3.3268e+08	2021-07-26	0	0.85
2021-07-27	1.4193e+07	0		0	0.4	0.0420967	0.171664	2.12895e+08	0.00513061	2.12506		0	2021-07-27	0.63993		1	2.05476e-09	7.73992e-09	0.446382	0.000609791	0.000609791	1	0.36007	0.942507	241300	0.011778	0		1.00003	0.765169	0.000609791	0.000600573	0.000610263	00:00:00	240022	2021-08-11			3.32685e+08	2021-07-27	0	0.85
2021-07-28	1.4193e+07	0		0	0.4	0.0374405	0.152672	2.12895e+08	0.00456322	2.12505		0	2021-07-28	0.63992		1	1.82522e-09	6.8835e-09	0.44638	0.000608696	0.000608696	1	0.36008	0.942507	241600	0.011778	0		1.00003	0.765189	0.000608696	0.000599087	0.000609162	00:00:00	240022	2021-08-11			3.32691e+08	2021-07-28	0	0.85
2021-07-29	1.4193e+07	0		0	0.4	0.0332996	0.135782	2.12895e+08	0.0040586	2.12504		0	2021-07-29	0.639909		1	1.62134e-09	6.12188e-09	0.446378	0.000607604	0.000607604	1	0.360091	0.942507	241900	0.011778	0		1.00003	0.765209	0.000607604	0.000597606	0.000608063	00:00:00	240022	2021-08-11			3.32696e+08	2021-07-29	0	0.85
2021-07-30	1.4193e+07	0		0	0.4	0.0296168	0.120761	2.12895e+08	0.00360981	2.12504		0	2021-07-30	0.639899		1	1.44024e-09	5.44455e-09	0.446377	0.000606515	0.000606515	1	0.360101	0.942507	242200	0.011778	0		1.00003	0.765229	0.000606515	0.000596128	0.000606966	00:00:00	240022	2021-08-11			3.32702e+08	2021-07-30	0	0.85
2021-07-31	1.4193e+07	0		0	0.4	0.0263415	0.107402	2.12895e+08	0.00321067	2.12503		0	2021-07-31	0.639888		1	1.27938e-09	4.8422e-09	0.446375	0.000605427	0.000605427	1	0.360112	0.942507	242500	0.011778	0		1.00003	0.76525	0.000605427	0.000594655	0.000605872	00:00:00	240022	2021-08-11			3.32707e+08	2021-07-31	0	0.85
2021-08-01	1.4193e+07	0		0	0.4	0.0234286	0.095522	2.12895e+08	0.00285569	2.12503		0	2021-08-01	0.639878		1	1.1365e-09	4.30651e-09	0.446374	0.000604342	0.000604342	1	0.360122	0.942507	242800	0.011778	0		1.00003	0.76527	0.000604342	0.000593186	0.00060478	00:00:00	240022	2021-08-11			3.32713e+08	2021-08-01	0	0.85
2021-08-02	1.4193e+07	0		0	0.4	0.020838	0.0849564	2.12895e+08	0.00253997	2.12502		0	2021-08-02	0.639867		1	1.00958e-09	3.83011e-09	0.446373	0.00060326	0.00060326	1	0.360133	0.942507	243100	0.011778	0		1.00003	0.765291	0.00060326	0.000591721	0.000603691	00:00:00	240022	2021-08-11			3.32718e+08	2021-08-02	0	0.85
2021-08-03	1.4193e+07	0		0	0.4	0.0185339	0.07556	2.12895e+08	0.00225917	2.12502		0	2021-08-03	0.639857		1	8.96846e-10	3.40643e-09	0.446372	0.000602179	0.000602179	1	0.360143	0.942507	243400	0.011778	0		1.00003	0.765313	0.000602179	0.000590261	0.000602603	00:00:00	240022	2021-08-11			3.32723e+08	2021-08-03	0	0.85
2021-08-04	1.4193e+07	0		0	0.4	0.0164848	0.0672033	2.12895e+08	0.00200943	2.12502		0	2021-08-04	0.639846		1	7.96706e-10	3.02964e-09	0.446372	0.000601101	0.000601101	1	0.360154	0.942507	243700	0.011778	0		1.00003	0.765334	0.000601101	0.000588804	0.000601519	00:00:00	240022	2021-08-11			3.32729e+08	2021-08-04	0	0.85
2021-08-05	1.4193e+07	0		0	0.4	0.0146623	0.0597712	2.12895e+08	0.00178731	2.12502		0	2021-08-05	0.639835		1	7.07753e-10	2.69454e-09	0.446371	0.000600025	0.000600025	1	0.360165	0.942507	244000	0.011778	0		1.00003	0.765355	0.000600025	0.000587351	0.000600436	00:00:00	240022	2021-08-11			3.32734e+08	2021-08-05	0	0.85
2021-08-06	1.4193e+07	0		0	0.4	0.0130413	0.0531614	2.12895e+08	0.00158976	2.12501		0	2021-08-06	0.639825		1	6.28738e-10	2.39653e-09	0.44637	0.000598952	0.000598952	1	0.360175	0.942507	244300	0.011778	0		1.00003	0.765377	0.000598952	0.000585903	0.000599356	00:00:00	240022	2021-08-11			3.3274e+08	2021-08-06	0	0.85
2021-08-07	1.4193e+07	0		0	0.4	0.0115997	0.0472829	2.12895e+08	0.00141405	2.12501		0	2021-08-07	0.639814		1	5.58549e-10	2.13149e-09	0.44637	0.000597881	0.000597881	1	0.360186	0.942507	244600	0.011778	0		1.00003	0.765399	0.000597881	0.000584458	0.000598278	00:00:00	240022	2021-08-11			3.32745e+08	2021-08-07	0	0.85
2021-08-08	1.4193e+07	0		0	0.4	0.0103175	0.0420547	2.12895e+08	0.00125777	2.12501		0	2021-08-08	0.639804		1	4.962e-10	1.89577e-09	0.44637	0.000596812	0.000596812	1	0.360196	0.942507	244900	0.011778	0		1.00003	0.76542	0.000596812	0.000583017	0.000597202	00:00:00	240022	2021-08-11			3.32751e+08	2021-08-08	0	0.85
2021-08-09	1.4193e+07	0		0	0.4	0.0091771	0.0374049	2.12895e+08	0.00111877	2.12501		0	2021-08-09	0.639793		1	4.40814e-10	1.68614e-09	0.446369	0.000595745	0.000595745	1	0.360207	0.942507	245200	0.011778	0		1.00003	0.765442	0.000595745	0.000581581	0.000596129	00:00:00	240022	2021-08-11			3.32756e+08	2021-08-09	0	0.85
2021-08-10	1.4193e+07	0		0	0.4	0.00816281	0.0332694	2.12895e+08	0.000995142	2.12501		0	2021-08-10	0.639783		1	3.91615e-10	1.49969e-09	0.446369	0.00059468	0.00059468	1	0.360217	0.942507	245500	0.011778	0		1.00003	0.765464	0.00059468	0.000580148	0.000595057	00:00:00	240022	2021-08-11			3.32762e+08	2021-08-10	0	0.85
2021-08-11	1.4193e+07	0		0	0.4	0	0.0295913	2.12895e+08	0.00088518	2.12501		0	2021-08-11	0.639772		1	0	1.33388e-09	0.446369	0.000593618	0.000593618	1	0.360228	0.942507	245800	0.011778	0		1.00003	0.765486	0.000593618	0.00057872	0.000593989	00:00:00	240022	2021-08-11			3.32767e+08	2021-08-11	0	0.85
2021-08-12	1.4193e+07	0		0	0.4	0	0.0255327	2.12895e+08	0	2.12501		0	2021-08-12	0.639762		1	0	1.15091e-09	0.446368	0.000592558	0.000592558	1	0.360238	0.942507	246100	0.011778	0		1.00003	0.765508	0.000592558	0.000577295	0.000592922	00:00:00	240022	2021-08-12			3.32773e+08	2021-08-12	0	0.85
2021-08-13	1.4193e+07	0		0	0.4	0	0.0219229	2.12895e+08	0	2.12501		0	2021-08-13	0.639751		1	0	9.88177e-10	0.446368	0.000591501	0.000591501	1	0.360249	0.942507	246400	0.011778	0		1.00003	0.76553	0.000591501	0.000575874	0.000591858	00:00:00	240022	2021-08-13			3.32778e+08	2021-08-13	0	0.85
2021-08-14	1.4193e+07	0		0	0.4	0	0.0187123	2.12895e+08	0	2.125		0	2021-08-14	0.639741		1	0	8.43442e-10	0.446368	0.000590445	0.000590445	1	0.360259	0.942507	246700	0.011778	0		1.00003	0.765552	0.000590445	0.000574458	0.000590796	00:00:00	240022	2021-08-14			3.32784e+08	2021-08-14	0	0.85
2021-08-15	1.4193e+07	0		0	0.4	0	0.0158566	2.12895e+08	0	2.125		0	2021-08-15	0.63973		1	0	7.14712e-10	0.446368	0.000589392	0.000589392	1	0.36027	0.942507	247000	0.011778	0		1.00003	0.765575	0.000589392	0.000573045	0.000589736	00:00:00	240022	2021-08-15			3.32789e+08	2021-08-15	0	0.85
2021-08-16	1.4193e+07	0		0	0.4	0	0.0133166	2.12895e+08	0	2.125		0	2021-08-16	0.63972		1	0	6.00217e-10	0.446368	0.000588341	0.000588341	1	0.36028	0.942507	247300	0.011778	0		1.00003	0.765597	0.000588341	0.000571636	0.000588678	00:00:00	240022	2021-08-16			3.32795e+08	2021-08-16	0	0.85
2021-08-17	1.4193e+07	0		0	0.4	0	0.0110574	2.12895e+08	0	2.125		0	2021-08-17	0.639709		1	0	4.98381e-10	0.446368	0.000587292	0.000587292	1	0.360291	0.942507	247600	0.011778	0		1.00003	0.765619	0.000587292	0.000570231	0.000587623	00:00:00	240022	2021-08-17			3.328e+08	2021-08-17	0	0.85
2021-08-18	1.4193e+07	0		0	0.4	0	0.00904799	2.12895e+08	0	2.125		0	2021-08-18	0.639699		1	0	4.07805e-10	0.446367	0.000586245	0.000586245	1	0.360301	0.942507	247900	0.011778	0		1.00003	0.765641	0.000586245	0.00056883	0.00058657	00:00:00	240022	2021-08-18			3.32806e+08	2021-08-18	0	0.85
2021-08-19	1.4193e+07	0		0	0.4	0	0.00726067	2.12895e+08	0	2.125		0	2021-08-19	0.639688		1	0	3.27243e-10	0.446367	0.000585201	0.000585201	1	0.360312	0.942507	248200	0.011778	0		1.00003	0.765663	0.000585201	0.000567432	0.000585519	00:00:00	240022	2021-08-19			3.32811e+08	2021-08-19	0	0.85
2021-08-20	1.4193e+07	0		0	0.4	0	0.00567092	2.12895e+08	0	2.125		0	2021-08-20	0.639678		1	0	2.55588e-10	0.446367	0.000584159	0.000584159	1	0.360322	0.942507	248500	0.011778	0		1.00003	0.765686	0.000584159	0.000566039	0.000584471	00:00:00	240022	2021-08-20			3.32816e+08	2021-08-20	0	0.85
2021-08-21	1.4193e+07	0		0	0.4	0	0.00425687	2.12895e+08	0	2.125		0	2021-08-21	0.639667		1	0	1.91853e-10	0.446367	0.000583119	0.000583119	1	0.360333	0.942507	248800	0.011778	0		1.00003	0.765708	0.000583119	0.000564649	0.000583424	00:00:00	240022	2021-08-21			3.32822e+08	2021-08-21	0	0.85
2021-08-22	1.4193e+07	0		0	0.4	0	0.0029991	2.12895e+08	0	2.125		0	2021-08-22	0.639657		1	0	1.35164e-10	0.446367	0.000582081	0.000582081	1	0.360343	0.942507	249100	0.011778	0		1.00003	0.76573	0.000582081	0.000563264	0.00058238	00:00:00	240022	2021-08-22			3.32827e+08	2021-08-22	0	0.85
2021-08-23	1.4193e+07	0		0	0.4	0	0.00188032	2.12895e+08	0	2.125		0	2021-08-23	0.639646		1	0	8.47418e-11	0.446367	0.000581045	0.000581045	1	0.360354	0.942507	249400	0.011778	0		1.00003	0.765752	0.000581045	0.000561882	0.000581338	00:00:00	240022	2021-08-23			3.32833e+08	2021-08-23	0	0.85
2021-08-24	1.4193e+07	0		0	0.4	0	0.000885181	2.12895e+08	0	2.125		0	2021-08-24	0.639636		1	0	3.98924e-11	0.446367	0.000580012	0.000580012	1	0.360364	0.942507	249700	0.011778	0		1.00003	0.765775	0.000580012	0.000560504	0.000580298	00:00:00	240022	2021-08-24			3.32838e+08	2021-08-24	0	0.85
2021-08-25	1.4193e+07	0		0	0.4	0	0	2.12895e+08	0	2.125		0	2021-08-25	0.639625		1	0	0	0.446367	0.000578981	0.000578981	1	0.360375	0.942507	250000	0.011778	0		1.00003	0.765797	0.000578981	0.000559129	0.000579261	00:00:00	240022	2021-08-25			3.32844e+08	2021-08-25	0	0.85
2021-08-26	1.4193e+07	0		0	0.4	0	0	2.12895e+08	0	2.125		0	2021-08-26	0.639615		1	0	0	0.446367	0.000577951	0.000577951	1	0.360385	0.942507	250300	0.011778	0		1.00003	0.765819	0.000577951	0.000557759	0.000578225	00:00:00	240022	2021-08-26			3.32849e+08	2021-08-26	0	0.85
2021-08-27	1.4193e+07	0		0	0.4	0	0	2.12895e+08	0	2.125		0	2021-08-27	0.639604		1	0	0	0.446367	0.000576925	0.000576925	1	0.360396	0.942507	250600	0.011778	0		1.00003	0.765841	0.000576925	0.000556392	0.000577192	00:00:00	240022	2021-08-27			3.32855e+08	2021-08-27	0	0.85
2021-08-28	1.4193e+07	0		0	0.4	0	0	2.12895e+08	0	2.125		0	2021-08-28	0.639594		1	0	0	0.446367	0.0005759	0.0005759	1	0.360406	0.942507	250900	0.011778	0		1.00003	0.765864	0.0005759	0.000555029	0.000576161	00:00:00	240022	2021-08-28			3.3286e+08	2021-08-28	0	0.85
2021-08-29	1.4193e+07	0		0	0.4	0	0	2.12895e+08	0	2.125		0	2021-08-29	0.639583		1	0	0	0.446367	0.000574877	0.000574877	1	0.360417	0.942507	251200	0.011778	0		1.00003	0.765886	0.000574877	0.00055367	0.000575132	00:00:00	240022	2021-08-29			3.32866e+08	2021-08-29	0	0.85
2021-08-30	1.4193e+07	0		0	0.4	0	0	2.12895e+08	0	2.125		0	2021-08-30	0.639573		1	0	0	0.446367	0.000573857	0.000573857	1	0.360427	0.942507	251500	0.011778	0		1.00003	0.765908	0.000573857	0.000552314	0.000574106	00:00:00	240022	2021-08-30			3.32871e+08	2021-08-30	0	0.85
2021-08-31	1.4193e+07	0		0	0.4	0	0	2.12895e+08	0	2.125		0	2021-08-31	0.639562		1	0	0	0.446367	0.000572838	0.000572838	1	0.360438	0.942507	251800	0.011778	0		1.00003	0.765931	0.000572838	0.000550962	0.000573081	00:00:00	240022	2021-08-31			3.32877e+08	2021-08-31	0	0.85
2021-09-01	1.4193e+07	0		0	0.4	0	0	2.12895e+08	0	2.17188		0	2021-09-01	0.639552		1	0	0	0.502236	0.000571822	0.000571822	1	0.360448	0.942507	252100	0.011778	0		1.00003	0.782849	0.000571822	0.000549614	0.000572059	00:00:00	240022	2021-09-01			3.32882e+08	2021-09-01	0	0.925
2021-09-02	1.4193e+07	0		0	0.4	0	0	2.12895e+08	0	2.18359		0	2021-09-02	0.639541		1	0	0	0.504907	0.000570808	0.000570808	1	0.360459	0.942507	252400	0.011778	0		1.00003	0.787096	0.000570808	0.00054827	0.000571038	00:00:00	240022	2021-09-02			3.32888e+08	2021-09-02	0	0.925
2021-09-03	1.4193e+07	0		0	0.4	0	0	2.12895e+08	0	2.19824		0	2021-09-03	0.639531		1	0	0	0.508207	0.000569796	0.000569796	1	0.360469	0.942507	252700	0.011778	0		1.00003	0.792399	0.000569796	0.000546929	0.00057002	00:00:00	240022	2021-09-03			3.32893e+08	2021-09-03	0	0.925
2021-09-04	1.4193e+07	0		0	0.4	0	0	2.12895e+08	0	2.21655		0	2021-09-04	0.63952		1	0	0	0.512269	0.000568786	0.000568786	1	0.36048	0.942507	253000	0.011778	0		1.00003	0.799023	0.000568786	0.000545592	0.000569004	00:00:00	240022	2021-09-04			3.32899e+08	2021-09-04	0	0.925
2021-09-05	1.4193e+07	0		0	0.4	0	0	2.12895e+08	0	2.22772		0	2021-09-05	0.63951		1	0	0	0.514715	0.000567778	0.000567778	1	0.36049	0.942507	253300	0.011778	0		1.00003	0.803073	0.000567778	0.000544259	0.00056799	00:00:00	240022	2021-09-05			3.32904e+08	2021-09-05	0	0.925
2021-09-06	1.4193e+07	0		0	0.4	0	0	2.12895e+08	0	2.23875		0	2021-09-06	0.639499		1	0	0	0.517106	0.000566772	0.000566772	1	0.360501	0.942507	253600	0.011778	0		1.00003	0.807073	0.000566772	0.000542929	0.000566979	00:00:00	240022	2021-09-06			3.32909e+08	2021-09-06	0	0.925
2021-09-07	1.4193e+07	0		0	0.4	0	0	2.12895e+08	0	2.24888		0	2021-09-07	0.639488		1	0	0	0.519281	0.000565769	0.000565769	1	0.360512	0.942507	253900	0.011778	0		1.00003	0.810748	0.000565769	0.000541603	0.000565969	00:00:00	240022	2021-09-07			3.32915e+08	2021-09-07	0	0.925
2021-09-08	1.4193e+07	0		0	0.4	0	0	2.12895e+08	0	2.25696		0	2021-09-08	0.639478		1	0	0	0.521002	0.000564767	0.000564767	1	0.360522	0.942507	254200	0.011778	0		1.00003	0.813686	0.000564767	0.000540281	0.000564962	00:00:00	240022	2021-09-08			3.3292e+08	2021-09-08	0	0.925
2021-09-09	1.4193e+07	0		0	0.4	0	0	2.12895e+08	0	2.26428		0	2021-09-09	0.639467		1	0	0	0.522549	0.000563768	0.000563768	1	0.360533	0.942507	254500	0.011778	0		1.00003	0.816345	0.000563768	0.000538962	0.000563956	00:00:00	240022	2021-09-09			3.32926e+08	2021-09-09	0	0.925
2021-09-10	1.4193e+07	0		0	0.4	0	0	2.12895e+08	0	2.27066		0	2021-09-10	0.639457		1	0	0	0.52389	0.000562771	0.000562771	1	0.360543	0.942507	254800	0.011778	0		1.00003	0.818669	0.000562771	0.000537646	0.000562953	00:00:00	240022	2021-09-10			3.32931e+08	2021-09-10	0	0.925
2021-09-11	1.4193e+07	0		0	0.4	0	0	2.12895e+08	0	2.2761		0	2021-09-11	0.639446		1	0	0	0.525029	0.000561775	0.000561775	1	0.360554	0.942507	255100	0.011778	0		1.00003	0.820656	0.000561775	0.000536335	0.000561952	00:00:00	240022	2021-09-11			3.32937e+08	2021-09-11	0	0.925
2021-09-12	1.4193e+07	0		0	0.4	0	0	2.12895e+08	0	2.28088		0	2021-09-12	0.639436		1	0	0	0.526025	0.000560782	0.000560782	1	0.360564	0.942507	255400	0.011778	0		1.00003	0.822404	0.000560782	0.000535027	0.000560953	00:00:00	240022	2021-09-12			3.32942e+08	2021-09-12	0	0.925
2021-09-13	1.4193e+07	0		0	0.4	0	0	2.12895e+08	0	2.28503		0	2021-09-13	0.639425		1	0	0	0.526886	0.000559791	0.000559791	1	0.360575	0.942507	255700	0.011778	0		1.00003	0.823925	0.000559791	0.000533722	0.000559956	00:00:00	240022	2021-09-13			3.32948e+08	2021-09-13	0	0.925
2021-09-14	1.4193e+07	0		0	0.4	0	0	2.12895e+08	0	2.28863		0	2021-09-14	0.639415		1	0	0	0.527629	0.000558802	0.000558802	1	0.360585	0.942507	256000	0.011778	0		1.00003	0.825245	0.000558802	0.000532421	0.000558961	00:00:00	240022	2021-09-14			3.32953e+08	2021-09-14	0	0.925
2021-09-15	1.4193e+07	0		0	0.4	0	0	2.12895e+08	0	2.29176		0	2021-09-15	0.639404		1	0	0	0.528275	0.000557815	0.000557815	1	0.360596	0.942507	256300	0.011778	0		1.00003	0.826399	0.000557815	0.000531124	0.000557968	00:00:00	240022	2021-09-15			3.32959e+08	2021-09-15	0	0.925
2021-09-16	1.4193e+07	0		0	0.4	0	0	2.12895e+08	0	2.29448		0	2021-09-16	0.639394		1	0	0	0.528834	0.00055683	0.00055683	1	0.360606	0.942507	256600	0.011778	0		1.00003	0.827404	0.00055683	0.00052983	0.000556977	00:00:00	240022	2021-09-16			3.32964e+08	2021-09-16	0	0.925
2021-09-17	1.4193e+07	0		0	0.4	0	0	2.12895e+08	0	2.29684		0	2021-09-17	0.639383		1	0	0	0.529319	0.000555847	0.000555847	1	0.360617	0.942507	256900	0.011778	0		1.00003	0.82828	0.000555847	0.000528539	0.000555989	00:00:00	240022	2021-09-17			3.3297e+08	2021-09-17	0	0.925
2021-09-18	1.4193e+07	0		0	0.4	0	0	2.12895e+08	0	2.2989		0	2021-09-18	0.639373		1	0	0	0.529739	0.000554866	0.000554866	1	0.360627	0.942507	257200	0.011778	0		1.00003	0.829044	0.000554866	0.000527253	0.000555002	00:00:00	240022	2021-09-18			3.32975e+08	2021-09-18	0	0.925
2021-09-19	1.4193e+07	0		0	0.4	0	0	2.12895e+08	0	2.30068		0	2021-09-19	0.639362		1	0	0	0.530104	0.000553887	0.000553887	1	0.360638	0.942507	257500	0.011778	0		1.00003	0.829712	0.000553887	0.000525969	0.000554017	00:00:00	240022	2021-09-19			3.32981e+08	2021-09-19	0	0.925
2021-09-20	1.4193e+07	0		0	0.4	0	0	2.12895e+08	0	2.30223		0	2021-09-20	0.639352		1	0	0	0.53042	0.00055291	0.00055291	1	0.360648	0.942507	257800	0.011778	0		1.00003	0.830295	0.00055291	0.000524689	0.000553035	00:00:00	240022	2021-09-20			3.32986e+08	2021-09-20	0	0.925
2021-09-21	1.4193e+07	0		0	0.4	0	0	2.12895e+08	0	2.30358		0	2021-09-21	0.639341		1	0	0	0.530695	0.000551936	0.000551936	1	0.360659	0.942507	258100	0.011778	0		1.00003	0.830805	0.000551936	0.000523413	0.000552054	00:00:00	240022	2021-09-21			3.32992e+08	2021-09-21	0	0.925
2021-09-22	1.4193e+07	0		0	0.4	0	0	2.12895e+08	0	2.30475		0	2021-09-22	0.639331		1	0	0	0.530933	0.000550963	0.000550963	1	0.360669	0.942507	258400	0.011778	0		1.00003	0.831251	0.000550963	0.00052214	0.000551076	00:00:00	240022	2021-09-22			3.32997e+08	2021-09-22	0	0.925
2021-09-23	1.4193e+07	0		0	0.4	0	0	2.12895e+08	0	2.30576		0	2021-09-23	0.63932		1	0	0	0.53114	0.000549992	0.000549992	1	0.36068	0.942507	258700	0.011778	0		1.00003	0.831642	0.000549992	0.00052087	0.000550099	00:00:00	240022	2021-09-23			3.33003e+08	2021-09-23	0	0.925
2021-09-24	1.4193e+07	0		0	0.4	0	0	2.12895e+08	0	2.30665		0	2021-09-24	0.63931		1	0	0	0.531319	0.000549023	0.000549023	1	0.36069	0.942507	259000	0.011778	0		1.00003	0.831985	0.000549023	0.000519604	0.000549125	00:00:00	240022	2021-09-24			3.33008e+08	2021-09-24	0	0.925
2021-09-25	1.4193e+07	0		0	0.4	0	0	2.12895e+08	0	2.30741		0	2021-09-25	0.639299		1	0	0	0.531475	0.000548056	0.000548056	1	0.360701	0.942507	259300	0.011778	0		1.00003	0.832286	0.000548056	0.000518342	0.000548153	00:00:00	240022	2021-09-25			3.33013e+08	2021-09-25	0	0.925
2021-09-26	1.4193e+07	0		0	0.4	0	0	2.12895e+08	0	2.30808		0	2021-09-26	0.639289		1	0	0	0.53161	0.000547092	0.000547092	1	0.360711	0.942507	259600	0.011778	0		1.00003	0.832551	0.000547092	0.000517083	0.000547182	00:00:00	240022	2021-09-26			3.33019e+08	2021-09-26	0	0.925
2021-09-27	1.4193e+07	0		0	0.4	0	0	2.12895e+08	0	2.30866		0	2021-09-27	0.639278		1	0	0	0.531728	0.000546129	0.000546129	1	0.360722	0.942507	259900	0.011778	0		1.00003	0.832784	0.000546129	0.000515827	0.000546214	00:00:00	240022	2021-09-27			3.33024e+08	2021-09-27	0	0.925
2021-09-28	1.4193e+07	0		0	0.4	0	0	2.12895e+08	0	2.30916		0	2021-09-28	0.639268		1	0	0	0.53183	0.000545168	0.000545168	1	0.360732	0.942507	260200	0.011778	0		1.00003	0.83299	0.000545168	0.000514574	0.000545247	00:00:00	240022	2021-09-28			3.3303e+08	2021-09-28	0	0.925
2021-09-29	1.4193e+07	0		0	0.4	0	0	2.12895e+08	0	2.3096		0	2021-09-29	0.639257		1	0	0	0.531919	0.000544209	0.000544209	1	0.360743	0.942507	260500	0.011778	0		1.00003	0.833172	0.000544209	0.000513325	0.000544283	00:00:00	240022	2021-09-29			3.33035e+08	2021-09-29	0	0.925
2021-09-30	1.4193e+07	0		0	0.4	0	0	2.12895e+08	0	2.30998		0	2021-09-30	0.639247		1	0	0	0.531996	0.000543252	0.000543252	1	0.360753	0.942507	260800	0.011778	0		1.00003	0.833333	0.000543252	0.00051208	0.000543321	00:00:00	240022	2021-09-30			3.33041e+08	2021-09-30	0	0.925
2021-10-01	1.4193e+07	0		0	0.4	0	0	2.12895e+08	0	2.35719		0	2021-10-01	0.639236		1	0	0	0.575765	0.000542297	0.000542297	1	0.360764	0.942507	261100	0.011778	0		1.00003	0.850387	0.000542297	0.000510837	0.00054236	00:00:00	240022	2021-10-01			3.33046e+08	2021-10-01	0	1
2021-10-02	1.4193e+07	0		0	0.4	0	0	2.12895e+08	0	2.36919		0	2021-10-02	0.639226		1	0	0	0.577915	0.000541344	0.000541344	1	0.360774	0.942507	261400	0.011778	0		1.00003	0.854744	0.000541344	0.000509599	0.000541402	00:00:00	240022	2021-10-02			3.33052e+08	2021-10-02	0	1
2021-10-03	1.4193e+07	0		0	0.4	0	0	2.12895e+08	0	2.38409		0	2021-10-03	0.639215		1	0	0	0.580553	0.000540393	0.000540393	1	0.360785	0.942507	261700	0.011778	0		1.00003	0.860143	0.000540393	0.000508363	0.000540446	00:00:00	240022	2021-10-03			3.33057e+08	2021-10-03	0	1
2021-10-04	1.4193e+07	0		0	0.4	0	0	2.12895e+08	0	2.40262		0	2021-10-04	0.639205		1	0	0	0.583787	0.000539444	0.000539444	1	0.360795	0.942507	262000	0.011778	0		1.00003	0.866853	0.000539444	0.000507131	0.000539491	00:00:00	240022	2021-10-04			3.33063e+08	2021-10-04	0	1
2021-10-05	1.4193e+07	0		0	0.4	0	0	2.12895e+08	0	2.41397		0	2021-10-05	0.639194		1	0	0	0.585745	0.000538497	0.000538497	1	0.360806	0.942507	262300	0.011778	0		1.00003	0.870976	0.000538497	0.000505902	0.000538539	00:00:00	240022	2021-10-05			3.33068e+08	2021-10-05	0	1
2021-10-06	1.4193e+07	0		0	0.4	0	0	2.12895e+08	0	2.42517		0	2021-10-06	0.639184		1	0	0	0.587658	0.000537552	0.000537552	1	0.360816	0.942507	262600	0.011778	0		1.00003	0.875041	0.000537552	0.000504676	0.000537588	00:00:00	240022	2021-10-06			3.33074e+08	2021-10-06	0	1
2021-10-07	1.4193e+07	0		0	0.4	0	0	2.12895e+08	0	2.43544		0	2021-10-07	0.639173		1	0	0	0.589397	0.000536609	0.000536609	1	0.360827	0.942507	262900	0.011778	0		1.00003	0.878772	0.000536609	0.000503454	0.00053664	00:00:00	240022	2021-10-07			3.33079e+08	2021-10-07	0	1
2021-10-08	1.4193e+07	0		0	0.4	0	0	2.12895e+08	0	2.44365		0	2021-10-08	0.639163		1	0	0	0.590776	0.000535668	0.000535668	1	0.360837	0.942507	263200	0.011778	0		1.00003	0.881759	0.000535668	0.000502235	0.000535693	00:00:00	240022	2021-10-08			3.33085e+08	2021-10-08	0	1
2021-10-09	1.4193e+07	0		0	0.4	0	0	2.12895e+08	0	2.45106		0	2021-10-09	0.639152		1	0	0	0.592014	0.000534728	0.000534728	1	0.360848	0.942507	263500	0.011778	0		1.00003	0.884461	0.000534728	0.000501019	0.000534748	00:00:00	240022	2021-10-09			3.3309e+08	2021-10-09	0	1
2021-10-10	1.4193e+07	0		0	0.4	0	0	2.12895e+08	0	2.45754		0	2021-10-10	0.639142		1	0	0	0.593089	0.000533791	0.000533791	1	0.360858	0.942507	263800	0.011778	0		1.00003	0.886823	0.000533791	0.000499807	0.000533806	00:00:00	240022	2021-10-10			3.33096e+08	2021-10-10	0	1
2021-10-11	1.4193e+07	0		0	0.4	0	0	2.12895e+08	0	2.46306		0	2021-10-11	0.639131		1	0	0	0.594001	0.000532855	0.000532855	1	0.360869	0.942507	264100	0.011778	0		1.00003	0.888842	0.000532855	0.000498597	0.000532865	00:00:00	240022	2021-10-11			3.33101e+08	2021-10-11	0	1
2021-10-12	1.4193e+07	0		0	0.4	0	0	2.12895e+08	0	2.46792		0	2021-10-12	0.639121		1	0	0	0.5948	0.000531922	0.000531922	1	0.360879	0.942507	264400	0.011778	0		1.00003	0.89062	0.000531922	0.000497391	0.000531926	00:00:00	240022	2021-10-12			3.33107e+08	2021-10-12	0	1
2021-10-13	1.4193e+07	0		0	0.4	0	0	2.12895e+08	0	2.47213		0	2021-10-13	0.63911		1	0	0	0.59549	0.00053099	0.00053099	1	0.36089	0.942507	264700	0.011778	0		1.00003	0.892166	0.00053099	0.000496189	0.000530989	00:00:00	240022	2021-10-13			3.33112e+08	2021-10-13	0	1
2021-10-14	1.4193e+07	0		0	0.4	0	0	2.12895e+08	0	2.47578		0	2021-10-14	0.6391		1	0	0	0.596086	0.00053006	0.00053006	1	0.3609	0.942507	265000	0.011778	0		1.00003	0.893509	0.00053006	0.000494989	0.000530054	00:00:00	240022	2021-10-14			3.33118e+08	2021-10-14	0	1
2021-10-15	1.4193e+07	0		0	0.4	0	0	2.12895e+08	0	2.47896		0	2021-10-15	0.639089		1	0	0	0.596604	0.000529133	0.000529133	1	0.360911	0.942507	265300	0.011778	0		1.00003	0.894682	0.000529133	0.000493793	0.000529121	00:00:00	240022	2021-10-15			3.33123e+08	2021-10-15	0	1
2021-10-16	1.4193e+07	0		0	0.4	0	0	2.12895e+08	0	2.48172		0	2021-10-16	0.639079		1	0	0	0.597053	0.000528207	0.000528207	1	0.360921	0.942507	265600	0.011778	0		1.00003	0.895704	0.000528207	0.0004926	0.00052819	00:00:00	240022	2021-10-16			3.33128e+08	2021-10-16	0	1
2021-10-17	1.4193e+07	0		0	0.4	0	0	2.12895e+08	0	2.48411		0	2021-10-17	0.639068		1	0	0	0.597442	0.000527283	0.000527283	1	0.360932	0.942507	265900	0.011778	0		1.00003	0.896595	0.000527283	0.00049141	0.000527261	00:00:00	240022	2021-10-17			3.33134e+08	2021-10-17	0	1
2021-10-18	1.4193e+07	0		0	0.4	0	0	2.12895e+08	0	2.4862		0	2021-10-18	0.639058		1	0	0	0.597779	0.00052636	0.00052636	1	0.360942	0.942507	266200	0.011778	0		1.00003	0.897373	0.00052636	0.000490223	0.000526333	00:00:00	240022	2021-10-18			3.33139e+08	2021-10-18	0	1
2021-10-19	1.4193e+07	0		0	0.4	0	0	2.12895e+08	0	2.48801		0	2021-10-19	0.639047		1	0	0	0.598072	0.00052544	0.00052544	1	0.360953	0.942507	266500	0.011778	0		1.00003	0.898053	0.00052544	0.00048904	0.000525408	00:00:00	240022	2021-10-19			3.33145e+08	2021-10-19	0	1
2021-10-20	1.4193e+07	0		0	0.4	0	0	2.12895e+08	0	2.48958		0	2021-10-20	0.639037		1	0	0	0.598326	0.000524522	0.000524522	1	0.360963	0.942507	266800	0.011778	0		1.00003	0.898647	0.000524522	0.000487859	0.000524484	00:00:00	240022	2021-10-20			3.3315e+08	2021-10-20	0	1
2021-10-21	1.4193e+07	0		0	0.4	0	0	2.12895e+08	0	2.49094		0	2021-10-21	0.639026		1	0	0	0.598546	0.000523605	0.000523605	1	0.360974	0.942507	267100	0.011778	0		1.00003	0.899166	0.000523605	0.000486682	0.000523563	00:00:00	240022	2021-10-21			3.33156e+08	2021-10-21	0	1
2021-10-22	1.4193e+07	0		0	0.4	0	0	2.12895e+08	0	2.49213		0	2021-10-22	0.639016		1	0	0	0.598737	0.00052269	0.00052269	1	0.360984	0.942507	267400	0.011778	0		1.00003	0.899621	0.00052269	0.000485508	0.000522643	00:00:00	240022	2021-10-22			3.33161e+08	2021-10-22	0	1
2021-10-23	1.4193e+07	0		0	0.4	0	0	2.12895e+08	0	2.49316		0	2021-10-23	0.639005		1	0	0	0.598903	0.000521777	0.000521777	1	0.360995	0.942507	267700	0.011778	0		1.00003	0.900019	0.000521777	0.000484337	0.000521725	00:00:00	240022	2021-10-23			3.33167e+08	2021-10-23	0	1
2021-10-24	1.4193e+07	0		0	0.4	0	0	2.12895e+08	0	2.49406		0	2021-10-24	0.638995		1	0	0	0.599047	0.000520866	0.000520866	1	0.361005	0.942507	268000	0.011778	0		1.00003	0.900369	0.000520866	0.000483169	0.000520809	00:00:00	240022	2021-10-24			3.33172e+08	2021-10-24	0	1
2021-10-25	1.4193e+07	0		0	0.4	0	0	2.12895e+08	0	2.49484		0	2021-10-25	0.638984		1	0	0	0.599173	0.000519957	0.000519957	1	0.361016	0.942507	268300	0.011778	0		1.00003	0.900677	0.000519957	0.000482004	0.000519895	00:00:00	240022	2021-10-25			3.33178e+08	2021-10-25	0	1
2021-10-26	1.4193e+07	0		0	0.4	0	0	2.12895e+08	0	2.49552		0	2021-10-26	0.638974		1	0	0	0.599281	0.00051905	0.00051905	1	0.361026	0.942507	268600	0.011778	0		1.00003	0.900947	0.00051905	0.000480843	0.000518983	00:00:00	240022	2021-10-26			3.33183e+08	2021-10-26	0	1
2021-10-27	1.4193e+07	0		0	0.4	0	0	2.12895e+08	0	2.4961		0	2021-10-27	0.638963		1	0	0	0.599376	0.000518145	0.000518145	1	0.361037	0.942507	268900	0.011778	0		1.00003	0.901186	0.000518145	0.000479684	0.000518072	00:00:00	240022	2021-10-27			3.33189e+08	2021-10-27	0	1
2021-10-28	1.4193e+07	0		0	0.4	0	0	2.12895e+08	0	2.49661		0	2021-10-28	0.638953		1	0	0	0.599458	0.000517241	0.000517241	1	0.361047	0.942507	269200	0.011778	0		1.00003	0.901396	0.000517241	0.000478529	0.000517164	00:00:00	240022	2021-10-28			3.33194e+08	2021-10-28	0	1
2021-10-29	1.4193e+07	0		0	0.4	0	0	2.12895e+08	0	2.49706		0	2021-10-29	0.638942		1	0	0	0.599529	0.000516339	0.000516339	1	0.361058	0.942507	269500	0.011778	0		1.00003	0.901583	0.000516339	0.000477377	0.000516257	00:00:00	240022	2021-10-29			3.332e+08	2021-10-29	0	1
2021-10-30	1.4193e+07	0		0	0.4	0	0	2.12895e+08	0	2.49744		0	2021-10-30	0.638932		1	0	0	0.599591	0.000515439	0.000515439	1	0.361068	0.942507	269800	0.011778	0		1.00003	0.901748	0.000515439	0.000476227	0.000515352	00:00:00	240022	2021-10-30			3.33205e+08	2021-10-30	0	1
2021-10-31	1.4193e+07	0		0	0.4	0	0	2.12895e+08	0	2.49778		0	2021-10-31	0.638921		1	0	0	0.599644	0.000514541	0.000514541	1	0.361079	0.942507	270100	0.011778	0		1.00003	0.901895	0.000514541	0.000475081	0.000514449	00:00:00	240022	2021-10-31			3.33211e+08	2021-10-31	0	1
2021-11-01	1.4193e+07	0		0	0.4	0	0	2.12895e+08	0	2.49807		0	2021-11-01	0.638911		1	0	0	0.599691	0.000513645	0.000513645	1	0.361089	0.942507	270400	0.011778	0		1.00003	0.902027	0.000513645	0.000473938	0.000513548	00:00:00	240022	2021-11-01			3.33216e+08	2021-11-01	0	1
2021-11-02	1.4193e+07	0		0	0.4	0	0	2.12895e+08	0	2.49832		0	2021-11-02	0.6389		1	0	0	0.599732	0.00051275	0.00051275	1	0.3611	0.942507	270700	0.011778	0		1.00003	0.902144	0.00051275	0.000472798	0.000512649	00:00:00	240022	2021-11-02			3.33222e+08	2021-11-02	0	1
2021-11-03	1.4193e+07	0		0	0.4	0	0	2.12895e+08	0	2.49854		0	2021-11-03	0.63889		1	0	0	0.599767	0.000511858	0.000511858	1	0.36111	0.942507	271000	0.011778	0		1.00003	0.90225	0.000511858	0.000471661	0.000511751	00:00:00	240022	2021-11-03			3.33227e+08	2021-11-03	0	1
2021-11-04	1.4193e+07	0		0	0.4	0	0	2.12895e+08	0	2.49873		0	2021-11-04	0.638879		1	0	0	0.599797	0.000510967	0.000510967	1	0.361121	0.942507	271300	0.011778	0		1.00003	0.902345	0.000510967	0.000470527	0.000510855	00:00:00	240022	2021-11-04			3.33233e+08	2021-11-04	0	1
2021-11-05	1.4193e+07	0		0	0.4	0	0	2.12895e+08	0	2.4989		0	2021-11-05	0.638869		1	0	0	0.599824	0.000510078	0.000510078	1	0.361131	0.942507	271600	0.011778	0		1.00003	0.902431	0.000510078	0.000469396	0.000509961	00:00:00	240022	2021-11-05			3.33238e+08	2021-11-05	0	1
2021-11-06	1.4193e+07	0		0	0.4	0	0	2.12895e+08	0	2.49904		0	2021-11-06	0.638858		1	0	0	0.599847	0.00050919	0.00050919	1	0.361142	0.942507	271900	0.011778	0		1.00003	0.90251	0.00050919	0.000468268	0.000509069	00:00:00	240022	2021-11-06			3.33243e+08	2021-11-06	0	1
2021-11-07	1.4193e+07	0		0	0.4	0	0	2.12895e+08	0	2.49917		0	2021-11-07	0.638848		1	0	0	0.599867	0.000508305	0.000508305	1	0.361152	0.942507	272200	0.011778	0		1.00003	0.902581	0.000508305	0.000467143	0.000508179	00:00:00	240022	2021-11-07			3.33249e+08	2021-11-07	0	1
2021-11-08	1.4193e+07	0		0	0.4	0	0	2.12895e+08	0	2.49928		0	2021-11-08	0.638837		1	0	0	0.599885	0.000507421	0.000507421	1	0.361163	0.942507	272500	0.011778	0		1.00003	0.902647	0.000507421	0.000466021	0.000507291	00:00:00	240022	2021-11-08			3.33254e+08	2021-11-08	0	1
2021-11-09	1.4193e+07	0		0	0.4	0	0	2.12895e+08	0	2.49937		0	2021-11-09	0.638827		1	0	0	0.5999	0.000506539	0.000506539	1	0.361173	0.942507	272800	0.011778	0		1.00003	0.902707	0.000506539	0.000464902	0.000506404	00:00:00	240022	2021-11-09			3.3326e+08	2021-11-09	0	1
2021-11-10	1.4193e+07	0		0	0.4	0	0	2.12895e+08	0	2.49946		0	2021-11-10	0.638816		1	0	0	0.599913	0.000505659	0.000505659	1	0.361184	0.942507	273100	0.011778	0		1.00003	0.902763	0.000505659	0.000463785	0.000505519	00:00:00	240022	2021-11-10			3.33265e+08	2021-11-10	0	1
2021-11-11	1.4193e+07	0		0	0.4	0	0	2.12895e+08	0	2.49953		0	2021-11-11	0.638806		1	0	0	0.599924	0.000504781	0.000504781	1	0.361194	0.942507	273400	0.011778	0		1.00003	0.902815	0.000504781	0.000462672	0.000504636	00:00:00	240022	2021-11-11			3.33271e+08	2021-11-11	0	1
2021-11-12	1.4193e+07	0		0	0.4	0	0	2.12895e+08	0	2.49959		0	2021-11-12	0.638795		1	0	0	0.599934	0.000503904	0.000503904	1	0.361205	0.942507	273700	0.011778	0		1.00003	0.902864	0.000503904	0.000461562	0.000503755	00:00:00	240022	2021-11-12			3.33276e+08	2021-11-12	0	1
2021-11-13	1.4193e+07	0		0	0.4	0	0	2.12895e+08	0	2.49964		0	2021-11-13	0.638785		1	0	0	0.599943	0.000503029	0.000503029	1	0.361215	0.942507	274000	0.011778	0		1.00003	0.90291	0.000503029	0.000460455	0.000502875	00:00:00	240022	2021-11-13			3.33282e+08	2021-11-13	0	1
2021-11-14	1.4193e+07	0		0	0.4	0	0	2.12895e+08	0	2.49969		0	2021-11-14	0.638774		1	0	0	0.59995	0.000502156	0.000502156	1	0.361226	0.942507	274300	0.011778	0		1.00003	0.902953	0.000502156	0.00045935	0.000501997	00:00:00	240022	2021-11-14			3.33287e+08	2021-11-14	0	1
2021-11-15	1.4193e+07	0		0	0.4	0	0	2.12895e+08	0	2.49973		0	2021-11-15	0.638764		1	0	0	0.599957	0.000501285	0.000501285	1	0.361236	0.942507	274600	0.011778	0		1.00003	0.902994	0.000501285	0.000458249	0.000501122	00:00:00	240022	2021-11-15			3.33293e+08	2021-11-15	0	1
2021-11-16	1.4193e+07	0		0	0.4	0	0	2.12895e+08	0	2.49977		0	2021-11-16	0.638753		1	0	0	0.599963	0.000500415	0.000500415	1	0.361247	0.942507	274900	0.011778	0		1.00003	0.903033	0.000500415	0.00045715	0.000500247	00:00:00	240022	2021-11-16			3.33298e+08	2021-11-16	0	1
2021-11-17	1.4193e+07	0		0	0.4	0	0	2.12895e+08	0	2.4998		0	2021-11-17	0.638743		1	0	0	0.599967	0.000499547	0.000499547	1	0.361257	0.942507	275200	0.011778	0		1.00003	0.90307	0.000499547	0.000456055	0.000499375	00:00:00	240022	2021-11-17			3.33304e+08	2021-11-17	0	1
2021-11-18	1.4193e+07	0		0	0.4	0	0	2.12895e+08	0	2.49982		0	2021-11-18	0.638732		1	0	0	0.599972	0.000498681	0.000498681	1	0.361268	0.942507	275500	0.011778	0		1.00003	0.903106	0.000498681	0.000454962	0.000498504	00:00:00	240022	2021-11-18			3.33309e+08	2021-11-18	0	1
2021-11-19	1.4193e+07	0		0	0.4	0	0	2.12895e+08	0	2.49985		0	2021-11-19	0.638722		1	0	0	0.599975	0.000497817	0.000497817	1	0.361278	0.942507	275800	0.011778	0		1.00003	0.903141	0.000497817	0.000453872	0.000497635	00:00:00	240022	2021-11-19			3.33315e+08	2021-11-19	0	1
2021-11-20	1.4193e+07	0		0	0.4	0	0	2.12895e+08	0	2.49987		0	2021-11-20	0.638711		1	0	0	0.599979	0.000496954	0.000496954	1	0.361289	0.942507	276100	0.011778	0		1.00003	0.903174	0.000496954	0.000452785	0.000496768	00:00:00	240022	2021-11-20			3.3332e+08	2021-11-20	0	1
2021-11-21	1.4193e+07	0		0	0.4	0	0	2.12895e+08	0	2.49988		0	2021-11-21	0.638701		1	0	0	0.599981	0.000496093	0.000496093	1	0.361299	0.942507	276400	0.011778	0		1.00003	0.903207	0.000496093	0.000451701	0.000495903	00:00:00	240022	2021-11-21			3.33326e+08	2021-11-21	0	1
2021-11-22	1.4193e+07	0		0	0.4	0	0	2.12895e+08	0	2.4999		0	2021-11-22	0.63869		1	0	0	0.599984	0.000495234	0.000495234	1	0.36131	0.942507	276700	0.011778	0		1.00003	0.903238	0.000495234	0.00045062	0.000495039	00:00:00	240022	2021-11-22			3.33331e+08	2021-11-22	0	1
2021-11-23	1.4193e+07	0		0	0.4	0	0	2.12895e+08	0	2.49991		0	2021-11-23	0.63868		1	0	0	0.599986	0.000494377	0.000494377	1	0.36132	0.942507	277000	0.011778	0		1.00003	0.903269	0.000494377	0.000449541	0.000494177	00:00:00	240022	2021-11-23			3.33337e+08	2021-11-23	0	1
2021-11-24	1.4193e+07	0		0	0.4	0	0	2.12895e+08	0	2.49992		0	2021-11-24	0.638669		1	0	0	0.599988	0.000493521	0.000493521	1	0.361331	0.942507	277300	0.011778	0		1.00003	0.9033	0.000493521	0.000448466	0.000493317	00:00:00	240022	2021-11-24			3.33342e+08	2021-11-24	0	1
2021-11-25	1.4193e+07	0		0	0.4	0	0	2.12895e+08	0	2.49993		0	2021-11-25	0.638659		1	0	0	0.599989	0.000492667	0.000492667	1	0.361341	0.942507	277600	0.011778	0		1.00003	0.90333	0.000492667	0.000447393	0.000492458	00:00:00	240022	2021-11-25			3.33348e+08	2021-11-25	0	1
2021-11-26	1.4193e+07	0		0	0.4	0	0	2.12895e+08	0	2.49994		0	2021-11-26	0.638648		1	0	0	0.599991	0.000491815	0.000491815	1	0.361352	0.942507	277900	0.011778	0		1.00003	0.903359	0.000491815	0.000446323	0.000491602	00:00:00	240022	2021-11-26			3.33353e+08	2021-11-26	0	1
2021-11-27	1.4193e+07	0		0	0.4	0	0	2.12895e+08	0	2.49995		0	2021-11-27	0.638638		1	0	0	0.599992	0.000490964	0.000490964	1	0.361362	0.942507	278200	0.011778	0		1.00003	0.903388	0.000490964	0.000445256	0.000490747	00:00:00	240022	2021-11-27			3.33359e+08	2021-11-27	0	1
2021-11-28	1.4193e+07	0		0	0.4	0	0	2.12895e+08	0	2.49996		0	2021-11-28	0.638627		1	0	0	0.599993	0.000490115	0.000490115	1	0.361373	0.942507	278500	0.011778	0		1.00003	0.903417	0.000490115	0.000444192	0.000489893	00:00:00	240022	2021-11-28			3.33364e+08	2021-11-28	0	1
2021-11-29	1.4193e+07	0		0	0.4	0	0	2.12895e+08	0	2.49996		0	2021-11-29	0.638617		1	0	0	0.599994	0.000489268	0.000489268	1	0.361383	0.942507	278800	0.011778	0		1.00003	0.903445	0.000489268	0.00044313	0.000489042	00:00:00	240022	2021-11-29			3.33369e+08	2021-11-29	0	1
2021-11-30	1.4193e+07	0		0	0.4	0	0	2.12895e+08	0	2.49997		0	2021-11-30	0.638606		1	0	0	0.599995	0.000488422	0.000488422	1	0.361394	0.942507	279100	0.011778	0		1.00003	0.903473	0.000488422	0.000442071	0.000488192	00:00:00	240022	2021-11-30			3.33375e+08	2021-11-30	0	1
2021-12-01	1.4193e+07	0		0	0.4	0	0	2.12895e+08	0	2.49997		0	2021-12-01	0.638596		1	0	0	0.599995	0.000487578	0.000487578	1	0.361404	0.942507	279400	0.011778	0		1.00003	0.903501	0.000487578	0.000441015	0.000487344	00:00:00	240022	2021-12-01			3.3338e+08	2021-12-01	0	1
2021-12-02	1.4193e+07	0		0	0.4	0	0	2.12895e+08	0	2.49998		0	2021-12-02	0.638585		1	0	0	0.599996	0.000486736	0.000486736	1	0.361415	0.942507	279700	0.011778	0		1.00003	0.903528	0.000486736	0.000439962	0.000486497	00:00:00	240022	2021-12-02			3.33386e+08	2021-12-02	0	1
2021-12-03	1.4193e+07	0		0	0.4	0	0	2.12895e+08	0	2.49998		0	2021-12-03	0.638575		1	0	0	0.599997	0.000485896	0.000485896	1	0.361425	0.942507	280000	0.011778	0		1.00003	0.903556	0.000485896	0.000438912	0.000485652	00:00:00	240022	2021-12-03			3.33391e+08	2021-12-03	0	1
2021-12-04	1.4193e+07	0		0	0.4	0	0	2.12895e+08	0	2.49998		0	2021-12-04	0.638564		1	0	0	0.599997	0.000485057	0.000485057	1	0.361436	0.942507	280300	0.011778	0		1.00003	0.903583	0.000485057	0.000437864	0.000484809	00:00:00	240022	2021-12-04			3.33397e+08	2021-12-04	0	1
2021-12-05	1.4193e+07	0		0	0.4	0	0	2.12895e+08	0	2.49998		0	2021-12-05	0.638554		1	0	0	0.599997	0.00048422	0.00048422	1	0.361446	0.942507	280600	0.011778	0		1.00003	0.90361	0.00048422	0.000436819	0.000483968	00:00:00	240022	2021-12-05			3.33402e+08	2021-12-05	0	1
2021-12-06	1.4193e+07	0		0	0.4	0	0	2.12895e+08	0	2.49999		0	2021-12-06	0.638543		1	0	0	0.599998	0.000483384	0.000483384	1	0.361457	0.942507	280900	0.011778	0		1.00003	0.903637	0.000483384	0.000435777	0.000483128	00:00:00	240022	2021-12-06			3.33408e+08	2021-12-06	0	1
2021-12-07	1.4193e+07	0		0	0.4	0	0	2.12895e+08	0	2.49999		0	2021-12-07	0.638533		1	0	0	0.599998	0.00048255	0.00048255	1	0.361467	0.942507	281200	0.011778	0		1.00003	0.903664	0.00048255	0.000434738	0.00048229	00:00:00	240022	2021-12-07			3.33413e+08	2021-12-07	0	1
2021-12-08	1.4193e+07	0		0	0.4	0	0	2.12895e+08	0	2.49999		0	2021-12-08	0.638522		1	0	0	0.599998	0.000481718	0.000481718	1	0.361478	0.942507	281500	0.011778	0		1.00003	0.903691	0.000481718	0.000433701	0.000481454	00:00:00	240022	2021-12-08			3.33419e+08	2021-12-08	0	1
2021-12-09	1.4193e+07	0		0	0.4	0	0	2.12895e+08	0	2.49999		0	2021-12-09	0.638512		1	0	0	0.599999	0.000480888	0.000480888	1	0.361488	0.942507	281800	0.011778	0		1.00003	0.903718	0.000480888	0.000432667	0.000480619	00:00:00	240022	2021-12-09			3.33424e+08	2021-12-09	0	1
2021-12-10	1.4193e+07	0		0	0.4	0	0	2.12895e+08	0	2.49999		0	2021-12-10	0.638501		1	0	0	0.599999	0.000480059	0.000480059	1	0.361499	0.942507	282100	0.011778	0		1.00003	0.903744	0.000480059	0.000431635	0.000479786	00:00:00	240022	2021-12-10			3.3343e+08	2021-12-10	0	1
2021-12-11	1.4193e+07	0		0	0.4	0	0	2.12895e+08	0	2.49999		0	2021-12-11	0.638491		1	0	0	0.599999	0.000479232	0.000479232	1	0.361509	0.942507	282400	0.011778	0		1.00003	0.903771	0.000479232	0.000430607	0.000478955	00:00:00	240022	2021-12-11			3.33435e+08	2021-12-11	0	1
2021-12-12	1.4193e+07	0		0	0.4	0	0	2.12895e+08	0	2.49999		0	2021-12-12	0.63848		1	0	0	0.599999	0.000478406	0.000478406	1	0.36152	0.942507	282700	0.011778	0		1.00003	0.903797	0.000478406	0.000429581	0.000478125	00:00:00	240022	2021-12-12			3.33441e+08	2021-12-12	0	1
2021-12-13	1.4193e+07	0		0	0.4	0	0	2.12895e+08	0	2.49999		0	2021-12-13	0.63847		1	0	0	0.599999	0.000477582	0.000477582	1	0.36153	0.942507	283000	0.011778	0		1.00003	0.903824	0.000477582	0.000428558	0.000477297	00:00:00	240022	2021-12-13			3.33446e+08	2021-12-13	0	1
2021-12-14	1.4193e+07	0		0	0.4	0	0	2.12895e+08	0	2.5		0	2021-12-14	0.638459		1	0	0	0.599999	0.00047676	0.00047676	1	0.361541	0.942507	283300	0.011778	0		1.00003	0.90385	0.00047676	0.000427537	0.00047647	00:00:00	240022	2021-12-14			3.33452e+08	2021-12-14	0	1
2021-12-15	1.4193e+07	0		0	0.4	0	0	2.12895e+08	0	2.5		0	2021-12-15	0.638449		1	0	0	0.599999	0.000475939	0.000475939	1	0.361551	0.942507	283600	0.011778	0		1.00003	0.903877	0.000475939	0.000426519	0.000475646	00:00:00	240022	2021-12-15			3.33457e+08	2021-12-15	0	1
2021-12-16	1.4193e+07	0		0	0.4	0	0	2.12895e+08	0	2.5		0	2021-12-16	0.638438		1	0	0	0.599999	0.00047512	0.00047512	1	0.361562	0.942507	283900	0.011778	0		1.00003	0.903903	0.00047512	0.000425504	0.000474822	00:00:00	240022	2021-12-16			3.33463e+08	2021-12-16	0	1
2021-12-17	1.4193e+07	0		0	0.4	0	0	2.12895e+08	0	2.5		0	2021-12-17	0.638428		1	0	0	0.6	0.000474303	0.000474303	1	0.361572	0.942507	284200	0.011778	0		1.00003	0.90393	0.000474303	0.000424491	0.000474001	00:00:00	240022	2021-12-17			3.33468e+08	2021-12-17	0	1
2021-12-18	1.4193e+07	0		0	0.4	0	0	2.12895e+08	0	2.5		0	2021-12-18	0.638417		1	0	0	0.6	0.000473487	0.000473487	1	0.361583	0.942507	284500	0.011778	0		1.00003	0.903956	0.000473487	0.000423481	0.000473181	00:00:00	240022	2021-12-18			3.33474e+08	2021-12-18	0	1
2021-12-19	1.4193e+07	0		0	0.4	0	0	2.12895e+08	0	2.5		0	2021-12-19	0.638407		1	0	0	0.6	0.000472673	0.000472673	1	0.361593	0.942507	284800	0.011778	0		1.00003	0.903983	0.000472673	0.000422474	0.000472363	00:00:00	240022	2021-12-19			3.33479e+08	2021-12-19	0	1
2021-12-20	1.4193e+07	0		0	0.4	0	0	2.12895e+08	0	2.5		0	2021-12-20	0.638396		1	0	0	0.6	0.00047186	0.00047186	1	0.361604	0.942507	285100	0.011778	0		1.00003	0.904009	0.00047186	0.000421469	0.000471546	00:00:00	240022	2021-12-20			3.33485e+08	2021-12-20	0	1
2021-12-21	1.4193e+07	0		0	0.4	0	0	2.12895e+08	0	2.5		0	2021-12-21	0.638386		1	0	0	0.6	0.000471049	0.000471049	1	0.361614	0.942507	285400	0.011778	0		1.00003	0.904035	0.000471049	0.000420467	0.000470731	00:00:00	240022	2021-12-21			3.3349e+08	2021-12-21	0	1
2021-12-22	1.4193e+07	0		0	0.4	0	0	2.12895e+08	0	2.5		0	2021-12-22	0.638375		1	0	0	0.6	0.00047024	0.00047024	1	0.361625	0.942507	285700	0.011778	0		1.00003	0.904062	0.00047024	0.000419467	0.000469918	00:00:00	240022	2021-12-22			3.33496e+08	2021-12-22	0	1
2021-12-23	1.4193e+07	0		0	0.4	0	0	2.12895e+08	0	2.5		0	2021-12-23	0.638365		1	0	0	0.6	0.000469432	0.000469432	1	0.361635	0.942507	286000	0.011778	0		1.00003	0.904088	0.000469432	0.00041847	0.000469106	00:00:00	240022	2021-12-23			3.33501e+08	2021-12-23	0	1
2021-12-24	1.4193e+07	0		0	0.4	0	0	2.12895e+08	0	2.5		0	2021-12-24	0.638354		1	0	0	0.6	0.000468626	0.000468626	1	0.361646	0.942507	286300	0.011778	0		1.00003	0.904114	0.000468626	0.000417476	0.000468296	00:00:00	240022	2021-12-24			3.33507e+08	2021-12-24	0	1
2021-12-25	1.4193e+07	0		0	0.4	0	0	2.12895e+08	0	2.5		0	2021-12-25	0.638344		1	0	0	0.6	0.000467821	0.000467821	1	0.361656	0.942507	286600	0.011778	0		1.00003	0.90414	0.000467821	0.000416484	0.000467487	00:00:00	240022	2021-12-25			3.33512e+08	2021-12-25	0	1
2021-12-26	1.4193e+07	0		0	0.4	0	0	2.12895e+08	0	2.5		0	2021-12-26	0.638333		1	0	0	0.6	0.000467018	0.000467018	1	0.361667	0.942507	286900	0.011778	0		1.00003	0.904167	0.000467018	0.000415495	0.00046668	00:00:00	240022	2021-12-26			3.33517e+08	2021-12-26	0	1
2021-12-27	1.4193e+07	0		0	0.4	0	0	2.12895e+08	0	2.5		0	2021-12-27	0.638323		1	0	0	0.6	0.000466217	0.000466217	1	0.361677	0.942507	287200	0.011778	0		1.00003	0.904193	0.000466217	0.000414508	0.000465875	00:00:00	240022	2021-12-27			3.33523e+08	2021-12-27	0	1
2021-12-28	1.4193e+07	0		0	0.4	0	0	2.12895e+08	0	2.5		0	2021-12-28	0.638312		1	0	0	0.6	0.000465417	0.000465417	1	0.361688	0.942507	287500	0.011778	0		1.00003	0.904219	0.000465417	0.000413524	0.000465071	00:00:00	240022	2021-12-28			3.33528e+08	2021-12-28	0	1
2021-12-29	1.4193e+07	0		0	0.4	0	0	2.12895e+08	0	2.5		0	2021-12-29	0.638302		1	0	0	0.6	0.000464619	0.000464619	1	0.361698	0.942507	287800	0.011778	0		1.00003	0.904245	0.000464619	0.000412543	0.000464269	00:00:00	240022	2021-12-29			3.33534e+08	2021-12-29	0	1
2021-12-30	1.4193e+07	0		0	0.4	0	0	2.12895e+08	0	2.5		0	2021-12-30	0.638291		1	0	0	0.6	0.000463822	0.000463822	1	0.361709	0.942507	288100	0.011778	0		1.00003	0.904272	0.000463822	0.000411564	0.000463469	00:00:00	240022	2021-12-30			3.33539e+08	2021-12-30	0	1
2021-12-31	1.4193e+07	0		0	0.4	0	0	2.12895e+08	0	2.5		0	2021-12-31	0.638281		1	0	0	0.6	0.000463027	0.000463027	1	0.361719	0.942507	288400	0.011778	0		1.00003	0.904298	0.000463027	0.000410587	0.00046267	00:00:00	240022	2021-12-31			3.33545e+08	2021-12-31	0	1
2022-01-01	1.4193e+07	0		0	0.4	0	0	2.12895e+08	0	2.5		0	2022-01-01	0.63827		1	0	0	0.6	0.000462233	0.000462233	1	0.36173	0.942507	288700	0.011778	0		1.00003	0.904324	0.000462233	0.000409613	0.000461872	00:00:00	240022	2022-01-01			3.3355e+08	2022-01-01	0	1
2022-01-02	1.4193e+07	0		0	0.4	0	0	2.12895e+08	0	2.5		0	2022-01-02	0.63826		1	0	0	0.6	0.000461441	0.000461441	1	0.36174	0.942507	289000	0.011778	0		1.00003	0.90435	0.000461441	0.000408642	0.000461076	00:00:00	240022	2022-01-02			3.33556e+08	2022-01-02	0	1
2022-01-03	1.4193e+07	0		0	0.4	0	0	2.12895e+08	0	2.5		0	2022-01-03	0.638249		1	0	0	0.6	0.000460651	0.000460651	1	0.361751	0.942507	289300	0.011778	0		1.00003	0.904377	0.000460651	0.000407673	0.000460282	00:00:00	240022	2022-01-03			3.33561e+08	2022-01-03	0	1
2022-01-04	1.4193e+07	0		0	0.4	0	0	2.12895e+08	0	2.5		0	2022-01-04	0.638239		1	0	0	0.6	0.000459862	0.000459862	1	0.361761	0.942507	289600	0.011778	0		1.00003	0.904403	0.000459862	0.000406707	0.000459489	00:00:00	240022	2022-01-04			3.33567e+08	2022-01-04	0	1
2022-01-05	1.4193e+07	0		0	0.4	0	0	2.12895e+08	0	2.5		0	2022-01-05	0.638228		1	0	0	0.6	0.000459075	0.000459075	1	0.361772	0.942507	289900	0.011778	0		1.00003	0.904429	0.000459075	0.000405743	0.000458698	00:00:00	240022	2022-01-05			3.33572e+08	2022-01-05	0	1
2022-01-06	1.4193e+07	0		0	0.4	0	0	2.12895e+08	0	2.5		0	2022-01-06	0.638218		1	0	0	0.6	0.000458289	0.000458289	1	0.361782	0.942507	290200	0.011778	0		1.00003	0.904455	0.000458289	0.000404782	0.000457909	00:00:00	240022	2022-01-06			3.33578e+08	2022-01-06	0	1
2022-01-07	1.4193e+07	0		0	0.4	0	0	2.12895e+08	0	2.5		0	2022-01-07	0.638207		1	0	0	0.6	0.000457505	0.000457505	1	0.361793	0.942507	290500	0.011778	0		1.00003	0.904482	0.000457505	0.000403823	0.000457121	00:00:00	240022	2022-01-07			3.33583e+08	2022-01-07	0	1
2022-01-08	1.4193e+07	0		0	0.4	0	0	2.12895e+08	0	2.5		0	2022-01-08	0.638197		1	0	0	0.6	0.000456722	0.000456722	1	0.361803	0.942507	290800	0.011778	0		1.00003	0.904508	0.000456722	0.000402866	0.000456334	00:00:00	240022	2022-01-08			3.33589e+08	2022-01-08	0	1
2022-01-09	1.4193e+07	0		0	0.4	0	0	2.12895e+08	0	2.5		0	2022-01-09	0.638186		1	0	0	0.6	0.000455941	0.000455941	1	0.361814	0.942507	291100	0.011778	0		1.00003	0.904534	0.000455941	0.000401912	0.000455549	00:00:00	240022	2022-01-09			3.33594e+08	2022-01-09	0	1
2022-01-10	1.4193e+07	0		0	0.4	0	0	2.12895e+08	0	2.5		0	2022-01-10	0.638176		1	0	0	0.6	0.000455161	0.000455161	1	0.361824	0.942507	291400	0.011778	0		1.00003	0.90456	0.000455161	0.000400961	0.000454766	00:00:00	240022	2022-01-10			3.336e+08	2022-01-10	0	1
2022-01-11	1.4193e+07	0		0	0.4	0	0	2.12895e+08	0	2.5		0	2022-01-11	0.638165		1	0	0	0.6	0.000454383	0.000454383	1	0.361835	0.942507	291700	0.011778	0		1.00003	0.904587	0.000454383	0.000400012	0.000453984	00:00:00	240022	2022-01-11			3.33605e+08	2022-01-11	0	1
2022-01-12	1.4193e+07	0		0	0.4	0	0	2.12895e+08	0	2.5		0	2022-01-12	0.638155		1	0	0	0.6	0.000453606	0.000453606	1	0.361845	0.942507	292000	0.011778	0		1.00003	0.904613	0.000453606	0.000399065	0.000453204	00:00:00	240022	2022-01-12			3.33611e+08	2022-01-12	0	1
2022-01-13	1.4193e+07	0		0	0.4	0	0	2.12895e+08	0	2.5		0	2022-01-13	0.638144		1	0	0	0.6	0.000452831	0.000452831	1	0.361856	0.942507	292300	0.011778	0		1.00003	0.904639	0.000452831	0.000398121	0.000452425	00:00:00	240022	2022-01-13			3.33616e+08	2022-01-13	0	1
2022-01-14	1.4193e+07	0		0	0.4	0	0	2.12895e+08	0	2.5		0	2022-01-14	0.638134		1	0	0	0.6	0.000452058	0.000452058	1	0.361866	0.942507	292600	0.011778	0		1.00003	0.904665	0.000452058	0.000397179	0.000451648	00:00:00	240022	2022-01-14			3.33622e+08	2022-01-14	0	1
2022-01-15	1.4193e+07	0		0	0.4	0	0	2.12895e+08	0	2.5		0	2022-01-15	0.638123		1	0	0	0.6	0.000451286	0.000451286	1	0.361877	0.942507	292900	0.011778	0		1.00003	0.904692	0.000451286	0.00039624	0.000450872	00:00:00	240022	2022-01-15			3.33627e+08	2022-01-15	0	1
2022-01-16	1.4193e+07	0		0	0.4	0	0	2.12895e+08	0	2.5		0	2022-01-16	0.638113		1	0	0	0.6	0.000450515	0.000450515	1	0.361887	0.942507	293200	0.011778	0		1.00003	0.904718	0.000450515	0.000395303	0.000450098	00:00:00	240022	2022-01-16			3.33633e+08	2022-01-16	0	1
2022-01-17	1.4193e+07	0		0	0.4	0	0	2.12895e+08	0	2.5		0	2022-01-17	0.638102		1	0	0	0.6	0.000449746	0.000449746	1	0.361898	0.942507	293500	0.011778	0		1.00003	0.904744	0.000449746	0.000394369	0.000449325	00:00:00	240022	2022-01-17			3.33638e+08	2022-01-17	0	1
2022-01-18	1.4193e+07	0		0	0.4	0	0	2.12895e+08	0	2.5		0	2022-01-18	0.638092		1	0	0	0.6	0.000448978	0.000448978	1	0.361908	0.942507	293800	0.011778	0		1.00003	0.90477	0.000448978	0.000393437	0.000448554	00:00:00	240022	2022-01-18			3.33644e+08	2022-01-18	0	1
2022-01-19	1.4193e+07	0		0	0.4	0	0	2.12895e+08	0	2.5		0	2022-01-19	0.638081		1	0	0	0.6	0.000448212	0.000448212	1	0.361919	0.942507	294100	0.011778	0		1.00003	0.904796	0.000448212	0.000392507	0.000447784	00:00:00	240022	2022-01-19			3.33649e+08	2022-01-19	0	1
2022-01-20	1.4193e+07	0		0	0.4	0	0	2.12895e+08	0	2.5		0	2022-01-20	0.638071		1	0	0	0.6	0.000447448	0.000447448	1	0.361929	0.942507	294400	0.011778	0		1.00003	0.904823	0.000447448	0.00039158	0.000447016	00:00:00	240022	2022-01-20			3.33655e+08	2022-01-20	0	1
2022-01-21	1.4193e+07	0		0	0.4	0	0	2.12895e+08	0	2.5		0	2022-01-21	0.63806		1	0	0	0.6	0.000446685	0.000446685	1	0.36194	0.942507	294700	0.011778	0		1.00003	0.904849	0.000446685	0.000390655	0.000446249	00:00:00	240022	2022-01-21			3.3366e+08	2022-01-21	0	1
2022-01-22	1.4193e+07	0		0	0.4	0	0	2.12895e+08	0	2.5		0	2022-01-22	0.63805		1	0	0	0.6	0.000445923	0.000445923	1	0.36195	0.942507	295000	0.011778	0		1.00003	0.904875	0.000445923	0.000389732	0.000445484	00:00:00	240022	2022-01-22			3.33666e+08	2022-01-22	0	1
2022-01-23	1.4193e+07	0		0	0.4	0	0	2.12895e+08	0	2.5		0	2022-01-23	0.638039		1	0	0	0.6	0.000445163	0.000445163	1	0.361961	0.942507	295300	0.011778	0		1.00003	0.904901	0.000445163	0.000388812	0.000444721	00:00:00	240022	2022-01-23			3.33671e+08	2022-01-23	0	1
2022-01-24	1.4193e+07	0		0	0.4	0	0	2.12895e+08	0	2.5		0	2022-01-24	0.638029		1	0	0	0.6	0.000444404	0.000444404	1	0.361971	0.942507	295600	0.011778	0		1.00003	0.904928	0.000444404	0.000387894	0.000443958	00:00:00	240022	2022-01-24			3.33677e+08	2022-01-24	0	1
2022-01-25	1.4193e+07	0		0	0.4	0	0	2.12895e+08	0	2.5		0	2022-01-25	0.638018		1	0	0	0.6	0.000443647	0.000443647	1	0.361982	0.942507	295900	0.011778	0		1.00003	0.904954	0.000443647	0.000386979	0.000443198	00:00:00	240022	2022-01-25			3.33682e+08	2022-01-25	0	1
2022-01-26	1.4193e+07	0		0	0.4	0	0	2.12895e+08	0	2.5		0	2022-01-26	0.638008		1	0	0	0.6	0.000442891	0.000442891	1	0.361992	0.942507	296200	0.011778	0		1.00003	0.90498	0.000442891	0.000386066	0.000442439	00:00:00	240022	2022-01-26			3.33687e+08	2022-01-26	0	1
2022-01-27	1.4193e+07	0		0	0.4	0	0	2.12895e+08	0	2.5		0	2022-01-27	0.637998		1	0	0	0.6	0.000442137	0.000442137	1	0.362002	0.942507	296500	0.011778	0		1.00003	0.905006	0.000442137	0.000385155	0.000441681	00:00:00	240022	2022-01-27			3.33693e+08	2022-01-27	0	1
2022-01-28	1.4193e+07	0		0	0.4	0	0	2.12895e+08	0	2.5		0	2022-01-28	0.637987		1	0	0	0.6	0.000441384	0.000441384	1	0.362013	0.942507	296800	0.011778	0		1.00003	0.905032	0.000441384	0.000384247	0.000440925	00:00:00	240022	2022-01-28			3.33698e+08	2022-01-28	0	1
2022-01-29	1.4193e+07	0		0	0.4	0	0	2.12895e+08	0	2.5		0	2022-01-29	0.637977		1	0	0	0.6	0.000440633	0.000440633	1	0.362023	0.942507	297100	0.011778	0		1.00003	0.905059	0.000440633	0.000383341	0.00044017	00:00:00	240022	2022-01-29			3.33704e+08	2022-01-29	0	1
2022-01-30	1.4193e+07	0		0	0.4	0	0	2.12895e+08	0	2.5		0	2022-01-30	0.637966		1	0	0	0.6	0.000439883	0.000439883	1	0.362034	0.942507	297400	0.011778	0		1.00003	0.905085	0.000439883	0.000382437	0.000439417	00:00:00	240022	2022-01-30			3.33709e+08	2022-01-30	0	1
2022-01-31	1.4193e+07	0		0	0.4	0	0	2.12895e+08	0	2.5		0	2022-01-31	0.637956		1	0	0	0.6	0.000439135	0.000439135	1	0.362044	0.942507	297700	0.011778	0		1.00003	0.905111	0.000439135	0.000381535	0.000438665	00:00:00	240022	2022-01-31			3.33715e+08	2022-01-31	0	1
2022-02-01	1.4193e+07	0		0	0.4	0	0	2.12895e+08	0	2.5		0	2022-02-01	0.637945		1	0	0	0.6	0.000438388	0.000438388	1	0.362055	0.942507	298000	0.011778	0		1.00003	0.905137	0.000438388	0.000380636	0.000437915	00:00:00	240022	2022-02-01			3.3372e+08	2022-02-01	0	1
2022-02-02	1.4193e+07	0		0	0.4	0	0	2.12895e+08	0	2.5		0	2022-02-02	0.637935		1	0	0	0.6	0.000437643	0.000437643	1	0.362065	0.942507	298300	0.011778	0		1.00003	0.905164	0.000437643	0.000379739	0.000437166	00:00:00	240022	2022-02-02			3.33726e+08	2022-02-02	0	1
2022-02-03	1.4193e+07	0		0	0.4	0	0	2.12895e+08	0	2.5		0	2022-02-03	0.637924		1	0	0	0.6	0.000436899	0.000436899	1	0.362076	0.942507	298600	0.011778	0		1.00003	0.90519	0.000436899	0.000378845	0.000436418	00:00:00	240022	2022-02-03			3.33731e+08	2022-02-03	0	1
2022-02-04	1.4193e+07	0		0	0.4	0	0	2.12895e+08	0	2.5		0	2022-02-04	0.637914		1	0	0	0.6	0.000436156	0.000436156	1	0.362086	0.942507	298900	0.011778	0		1.00003	0.905216	0.000436156	0.000377952	0.000435672	00:00:00	240022	2022-02-04			3.33737e+08	2022-02-04	0	1
2022-02-05	1.4193e+07	0		0	0.4	0	0	2.12895e+08	0	2.5		0	2022-02-05	0.637903		1	0	0	0.6	0.000435415	0.000435415	1	0.362097	0.942507	299200	0.011778	0		1.00003	0.905242	0.000435415	0.000377062	0.000434928	00:00:00	240022	2022-02-05			3.33742e+08	2022-02-05	0	1
2022-02-06	1.4193e+07	0		0	0.4	0	0	2.12895e+08	0	2.5		0	2022-02-06	0.637893		1	0	0	0.6	0.000434675	0.000434675	1	0.362107	0.942507	299500	0.011778	0		1.00003	0.905268	0.000434675	0.000376175	0.000434185	00:00:00	240022	2022-02-06			3.33748e+08	2022-02-06	0	1
2022-02-07	1.4193e+07	0		0	0.4	0	0	2.12895e+08	0	2.5		0	2022-02-07	0.637882		1	0	0	0.6	0.000433937	0.000433937	1	0.362118	0.942507	299800	0.011778	0		1.00003	0.905295	0.000433937	0.000375289	0.000433443	00:00:00	240022	2022-02-07			3.33753e+08	2022-02-07	0	1
2022-02-08	1.4193e+07	0		0	0.4	0	0	2.12895e+08	0	2.5		0	2022-02-08	0.637872		1	0	0	0.6	0.0004332	0.0004332	1	0.362128	0.942507	300100	0.011778	0		1.00003	0.905321	0.0004332	0.000374406	0.000432703	00:00:00	240022	2022-02-08			3.33759e+08	2022-02-08	0	1
2022-02-09	1.4193e+07	0		0	0.4	0	0	2.12895e+08	0	2.5		0	2022-02-09	0.637861		1	0	0	0.6	0.000432464	0.000432464	1	0.362139	0.942507	300400	0.011778	0		1.00003	0.905347	0.000432464	0.000373525	0.000431964	00:00:00	240022	2022-02-09			3.33764e+08	2022-02-09	0	1
2022-02-10	1.4193e+07	0		0	0.4	0	0	2.12895e+08	0	2.5		0	2022-02-10	0.637851		1	0	0	0.6	0.00043173	0.00043173	1	0.362149	0.942507	300700	0.011778	0		1.00003	0.905373	0.00043173	0.000372646	0.000431227	00:00:00	240022	2022-02-10			3.3377e+08	2022-02-10	0	1
2022-02-11	1.4193e+07	0		0	0.4	0	0	2.12895e+08	0	2.5		0	2022-02-11	0.63784		1	0	0	0.6	0.000430998	0.000430998	1	0.36216	0.942507	301000	0.011778	0		1.00003	0.905399	0.000430998	0.00037177	0.000430491	00:00:00	240022	2022-02-11			3.33775e+08	2022-02-11	0	1
2022-02-12	1.4193e+07	0		0	0.4	0	0	2.12895e+08	0	2.5		0	2022-02-12	0.63783		1	0	0	0.6	0.000430267	0.000430267	1	0.36217	0.942507	301300	0.011778	0		1.00003	0.905426	0.000430267	0.000370896	0.000429756	00:00:00	240022	2022-02-12			3.33781e+08	2022-02-12	0	1
2022-02-13	1.4193e+07	0		0	0.4	0	0	2.12895e+08	0	2.5		0	2022-02-13	0.637819		1	0	0	0.6	0.000429537	0.000429537	1	0.362181	0.942507	301600	0.011778	0		1.00003	0.905452	0.000429537	0.000370024	0.000429023	00:00:00	240022	2022-02-13			3.33786e+08	2022-02-13	0	1
2022-02-14	1.4193e+07	0		0	0.4	0	0	2.12895e+08	0	2.5		0	2022-02-14	0.637809		1	0	0	0.6	0.000428808	0.000428808	1	0.362191	0.942507	301900	0.011778	0		1.00003	0.905478	0.000428808	0.000369154	0.000428292	00:00:00	240022	2022-02-14			3.33792e+08	2022-02-14	0	1
2022-02-15	1.4193e+07	0		0	0.4	0	0	2.12895e+08	0	2.5		0	2022-02-15	0.637798		1	0	0	0.6	0.000428081	0.000428081	1	0.362202	0.942507	302200	0.011778	0		1.00003	0.905504	0.000428081	0.000368286	0.000427562	00:00:00	240022	2022-02-15			3.33797e+08	2022-02-15	0	1
2022-02-16	1.4193e+07	0		0	0.4	0	0	2.12895e+08	0	2.5		0	2022-02-16	0.637788		1	0	0	0.6	0.000427356	0.000427356	1	0.362212	0.942507	302500	0.011778	0		1.00003	0.90553	0.000427356	0.000367421	0.000426833	00:00:00	240022	2022-02-16			3.33803e+08	2022-02-16	0	1
2022-02-17	1.4193e+07	0		0	0.4	0	0	2.12895e+08	0	2.5		0	2022-02-17	0.637777		1	0	0	0.6	0.000426632	0.000426632	1	0.362223	0.942507	302800	0.011778	0		1.00003	0.905557	0.000426632	0.000366558	0.000426105	00:00:00	240022	2022-02-17			3.33808e+08	2022-02-17	0	1
2022-02-18	1.4193e+07	0		0	0.4	0	0	2.12895e+08	0	2.5		0	2022-02-18	0.637767		1	0	0	0.6	0.000425909	0.000425909	1	0.362233	0.942507	303100	0.011778	0		1.00003	0.905583	0.000425909	0.000365697	0.00042538	00:00:00	240022	2022-02-18			3.33814e+08	2022-02-18	0	1
2022-02-19	1.4193e+07	0		0	0.4	0	0	2.12895e+08	0	2.5		0	2022-02-19	0.637756		1	0	0	0.6	0.000425188	0.000425188	1	0.362244	0.942507	303400	0.011778	0		1.00003	0.905609	0.000425188	0.000364838	0.000424655	00:00:00	240022	2022-02-19			3.33819e+08	2022-02-19	0	1
2022-02-20	1.4193e+07	0		0	0.4	0	0	2.12895e+08	0	2.5		0	2022-02-20	0.637746		1	0	0	0.6	0.000424468	0.000424468	1	0.362254	0.942507	303700	0.011778	0		1.00003	0.905635	0.000424468	0.000363982	0.000423932	00:00:00	240022	2022-02-20			3.33825e+08	2022-02-20	0	1
2022-02-21	1.4193e+07	0		0	0.4	0	0	2.12895e+08	0	2.5		0	2022-02-21	0.637735		1	0	0	0.6	0.000423749	0.000423749	1	0.362265	0.942507	304000	0.011778	0		1.00003	0.905662	0.000423749	0.000363127	0.00042321	00:00:00	240022	2022-02-21			3.3383e+08	2022-02-21	0	1
2022-02-22	1.4193e+07	0		0	0.4	0	0	2.12895e+08	0	2.5		0	2022-02-22	0.637725		1	0	0	0.6	0.000423032	0.000423032	1	0.362275	0.942507	304300	0.011778	0		1.00003	0.905688	0.000423032	0.000362275	0.00042249	00:00:00	240022	2022-02-22			3.33836e+08	2022-02-22	0	1
2022-02-23	1.4193e+07	0		0	0.4	0	0	2.12895e+08	0	2.5		0	2022-02-23	0.637714		1	0	0	0.6	0.000422316	0.000422316	1	0.362286	0.942507	304600	0.011778	0		1.00003	0.905714	0.000422316	0.000361425	0.000421771	00:00:00	240022	2022-02-23			3.33841e+08	2022-02-23	0	1
2022-02-24	1.4193e+07	0		0	0.4	0	0	2.12895e+08	0	2.5		0	2022-02-24	0.637704		1	0	0	0.6	0.000421601	0.000421601	1	0.362296	0.942507	304900	0.011778	0		1.00003	0.90574	0.000421601	0.000360577	0.000421053	00:00:00	240022	2022-02-24			3.33847e+08	2022-02-24	0	1
2022-02-25	1.4193e+07	0		0	0.4	0	0	2.12895e+08	0	2.5		0	2022-02-25	0.637693		1	0	0	0.6	0.000420888	0.000420888	1	0.362307	0.942507	305200	0.011778	0		1.00003	0.905766	0.000420888	0.000359731	0.000420337	00:00:00	240022	2022-02-25			3.33852e+08	2022-02-25	0	1
2022-02-26	1.4193e+07	0		0	0.4	0	0	2.12895e+08	0	2.5		0	2022-02-26	0.637683		1	0	0	0.6	0.000420176	0.000420176	1	0.362317	0.942507	305500	0.011778	0		1.00003	0.905793	0.000420176	0.000358887	0.000419622	00:00:00	240022	2022-02-26			3.33858e+08	2022-02-26	0	1
2022-02-27	1.4193e+07	0		0	0.4	0	0	2.12895e+08	0	2.5		0	2022-02-27	0.637672		1	0	0	0.6	0.000419466	0.000419466	1	0.362328	0.942507	305800	0.011778	0		1.00003	0.905819	0.000419466	0.000358046	0.000418909	00:00:00	240022	2022-02-27			3.33863e+08	2022-02-27	0	1
2022-02-28	1.4193e+07	0		0	0.4	0	0	2.12895e+08	0	2.5		0	2022-02-28	0.637662		1	0	0	0.6	0.000418757	0.000418757	1	0.362338	0.942507	306100	0.011778	0		1.00003	0.905845	0.000418757	0.000357207	0.000418197	00:00:00	240022	2022-02-28			3.33869e+08	2022-02-28	0	1
2022-03-01	1.4193e+07	0		0	0.4	0	0	2.12895e+08	0	2.5		0	2022-03-01	0.637652		1	0	0	0.6	0.000418049	0.000418049	1	0.362348	0.942507	306400	0.011778	0		1.00003	0.905871	0.000418049	0.000356369	0.000417486	00:00:00	240022	2022-03-01			3.33874e+08	2022-03-01	0	1
2022-03-02	1.4193e+07	0		0	0.4	0	0	2.12895e+08	0	2.5		0	2022-03-02	0.637641		1	0	0	0.6	0.000417343	0.000417343	1	0.362359	0.942507	306700	0.011778	0		1.00003	0.905897	0.000417343	0.000355534	0.000416776	00:00:00	240022	2022-03-02			3.3388e+08	2022-03-02	0	1
2022-03-03	1.4193e+07	0		0	0.4	0	0	2.12895e+08	0	2.5		0	2022-03-03	0.637631		1	0	0	0.6	0.000416638	0.000416638	1	0.362369	0.942507	307000	0.011778	0		1.00003	0.905924	0.000416638	0.000354701	0.000416069	00:00:00	240022	2022-03-03			3.33885e+08	2022-03-03	0	1
2022-03-04	1.4193e+07	0		0	0.4	0	0	2.12895e+08	0	2.5		0	2022-03-04	0.63762		1	0	0	0.6	0.000415935	0.000415935	1	0.36238	0.942507	307300	0.011778	0		1.00003	0.90595	0.000415935	0.00035387	0.000415362	00:00:00	240022	2022-03-04			3.33891e+08	2022-03-04	0	1
2022-03-05	1.4193e+07	0		0	0.4	0	0	2.12895e+08	0	2.5		0	2022-03-05	0.63761		1	0	0	0.6	0.000415232	0.000415232	1	0.36239	0.942507	307600	0.011778	0		1.00003	0.905976	0.000415232	0.000353042	0.000414657	00:00:00	240022	2022-03-05			3.33896e+08	2022-03-05	0	1
2022-03-06	1.4193e+07	0		0	0.4	0	0	2.12895e+08	0	2.5		0	2022-03-06	0.637599		1	0	0	0.6	0.000414531	0.000414531	1	0.362401	0.942507	307900	0.011778	0		1.00003	0.906002	0.000414531	0.000352215	0.000413953	00:00:00	240022	2022-03-06			3.33901e+08	2022-03-06	0	1
2022-03-07	1.4193e+07	0		0	0.4	0	0	2.12895e+08	0	2.5		0	2022-03-07	0.637589		1	0	0	0.6	0.000413832	0.000413832	1	0.362411	0.942507	308200	0.011778	0		1.00003	0.906028	0.000413832	0.00035139	0.00041325	00:00:00	240022	2022-03-07			3.33907e+08	2022-03-07	0	1
2022-03-08	1.4193e+07	0		0	0.4	0	0	2.12895e+08	0	2.5		0	2022-03-08	0.637578		1	0	0	0.6	0.000413134	0.000413134	1	0.362422	0.942507	308500	0.011778	0		1.00003	0.906055	0.000413134	0.000350568	0.000412549	00:00:00	240022	2022-03-08			3.33912e+08	2022-03-08	0	1
2022-03-09	1.4193e+07	0		0	0.4	0	0	2.12895e+08	0	2.5		0	2022-03-09	0.637568		1	0	0	0.6	0.000412437	0.000412437	1	0.362432	0.942507	308800	0.011778	0		1.00003	0.906081	0.000412437	0.000349747	0.000411849	00:00:00	240022	2022-03-09			3.33918e+08	2022-03-09	0	1
2022-03-10	1.4193e+07	0		0	0.4	0	0	2.12895e+08	0	2.5		0	2022-03-10	0.637557		1	0	0	0.6	0.000411741	0.000411741	1	0.362443	0.942507	309100	0.011778	0		1.00003	0.906107	0.000411741	0.000348929	0.000411151	00:00:00	240022	2022-03-10			3.33923e+08	2022-03-10	0	1
2022-03-11	1.4193e+07	0		0	0.4	0	0	2.12895e+08	0	2.5		0	2022-03-11	0.637547		1	0	0	0.6	0.000411047	0.000411047	1	0.362453	0.942507	309400	0.011778	0		1.00003	0.906133	0.000411047	0.000348112	0.000410453	00:00:00	240022	2022-03-11			3.33929e+08	2022-03-11	0	1
2022-03-12	1.4193e+07	0		0	0.4	0	0	2.12895e+08	0	2.5		0	2022-03-12	0.637536		1	0	0	0.6	0.000410354	0.000410354	1	0.362464	0.942507	309700	0.011778	0		1.00003	0.906159	0.000410354	0.000347298	0.000409758	00:00:00	240022	2022-03-12			3.33934e+08	2022-03-12	0	1
2022-03-13	1.4193e+07	0		0	0.4	0	0	2.12895e+08	0	2.5		0	2022-03-13	0.637526		1	0	0	0.6	0.000409662	0.000409662	1	0.362474	0.942507	310000	0.011778	0		1.00003	0.906186	0.000409662	0.000346486	0.000409063	00:00:00	240022	2022-03-13			3.3394e+08	2022-03-13	0	1
2022-03-14	1.4193e+07	0		0	0.4	0	0	2.12895e+08	0	2.5		0	2022-03-14	0.637515		1	0	0	0.6	0.000408972	0.000408972	1	0.362485	0.942507	310300	0.011778	0		1.00003	0.906212	0.000408972	0.000345676	0.00040837	00:00:00	240022	2022-03-14			3.33945e+08	2022-03-14	0	1
2022-03-15	1.4193e+07	0		0	0.4	0	0	2.12895e+08	0	2.5		0	2022-03-15	0.637505		1	0	0	0.6	0.000408283	0.000408283	1	0.362495	0.942507	310600	0.011778	0		1.00003	0.906238	0.000408283	0.000344868	0.000407678	00:00:00	240022	2022-03-15			3.33951e+08	2022-03-15	0	1
2022-03-16	1.4193e+07	0		0	0.4	0	0	2.12895e+08	0	2.5		0	2022-03-16	0.637494		1	0	0	0.6	0.000407595	0.000407595	1	0.362506	0.942507	310900	0.011778	0		1.00003	0.906264	0.000407595	0.000344062	0.000406988	00:00:00	240022	2022-03-16			3.33956e+08	2022-03-16	0	1
2022-03-17	1.4193e+07	0		0	0.4	0	0	2.12895e+08	0	2.5		0	2022-03-17	0.637484		1	0	0	0.6	0.000406909	0.000406909	1	0.362516	0.942507	311200	0.011778	0		1.00003	0.90629	0.000406909	0.000343258	0.000406298	00:00:00	240022	2022-03-17			3.33962e+08	2022-03-17	0	1
2022-03-18	1.4193e+07	0		0	0.4	0	0	2.12895e+08	0	2.5		0	2022-03-18	0.637473		1	0	0	0.6	0.000406224	0.000406224	1	0.362527	0.942507	311500	0.011778	0		1.00003	0.906317	0.000406224	0.000342455	0.000405611	00:00:00	240022	2022-03-18			3.33967e+08	2022-03-18	0	1
2022-03-19	1.4193e+07	0		0	0.4	0	0	2.12895e+08	0	2.5		0	2022-03-19	0.637463		1	0	0	0.6	0.00040554	0.00040554	1	0.362537	0.942507	311800	0.011778	0		1.00003	0.906343	0.00040554	0.000341655	0.000404924	00:00:00	240022	2022-03-19			3.33973e+08	2022-03-19	0	1
2022-03-20	1.4193e+07	0		0	0.4	0	0	2.12895e+08	0	2.5		0	2022-03-20	0.637452		1	0	0	0.6	0.000404858	0.000404858	1	0.362548	0.942507	312100	0.011778	0		1.00003	0.906369	0.000404858	0.000340857	0.000404239	00:00:00	240022	2022-03-20			3.33978e+08	2022-03-20	0	1
2022-03-21	1.4193e+07	0		0	0.4	0	0	2.12895e+08	0	2.5		0	2022-03-21	0.637442		1	0	0	0.6	0.000404177	0.000404177	1	0.362558	0.942507	312400	0.011778	0		1.00003	0.906395	0.000404177	0.000340061	0.000403555	00:00:00	240022	2022-03-21			3.33984e+08	2022-03-21	0	1
2022-03-22	1.4193e+07	0		0	0.4	0	0	2.12895e+08	0	2.5		0	2022-03-22	0.637431		1	0	0	0.6	0.000403497	0.000403497	1	0.362569	0.942507	312700	0.011778	0		1.00003	0.906421	0.000403497	0.000339267	0.000402872	00:00:00	240022	2022-03-22			3.33989e+08	2022-03-22	0	1
2022-03-23	1.4193e+07	0		0	0.4	0	0	2.12895e+08	0	2.5		0	2022-03-23	0.637421		1	0	0	0.6	0.000402818	0.000402818	1	0.3626	0.942507	313000	0.011778	0		1.00009	0.906499	0.000402818	0.000338475	0.000402191	00:00:00	240022	2022-03-23			3.33995e+08	2022-03-23	10779	1
2022-03-24	1.4193e+07	0		0	0.4	0	0	2.12895e+08	0	2.5		0	2022-03-24	0.63741		1	0	0	0.6	0.000402141	0.000402141	1	0.36263	0.942507	313300	0.011778	0		1.00008	0.906574	0.000402141	0.000337685	0.000401511	00:00:00	240022	2022-03-24			3.34e+08	2022-03-24	21049	1
2022-03-25	1.4193e+07	0		0	0.4	0	0	2.12895e+08	0	2.5		0	2022-03-25	0.6374		1	0	0	0.6	0.000401465	0.000401465	1	0.362667	0.942507	313600	0.011778	0		1.0001	0.906667	0.000401465	0.000336897	0.000400832	00:00:00	240022	2022-03-25			3.34006e+08	2022-03-25	35036	1
2022-03-26	1.4193e+07	0		0	0.4	0	0	2.12895e+08	0	2.5		0	2022-03-26	0.63739		1	0	0	0.6	0.00040079	0.00040079	1	0.36271	0.942507	313900	0.011778	0		1.00012	0.906774	0.00040079	0.000336111	0.000400155	00:00:00	240022	2022-03-26			3.34011e+08	2022-03-26	51952	1
2022-03-27	1.4193e+07	0		0	0.4	0	0	2.12895e+08	0	2.5		0	2022-03-27	0.637379		1	0	0	0.6	0.000400117	0.000400117	1	0.362754	0.942507	314200	0.011778	0		1.00012	0.906886	0.000400117	0.000335327	0.000399478	00:00:00	240022	2022-03-27			3.34017e+08	2022-03-27	69917	1
2022-03-28	1.4193e+07	0		0	0.4	0	0	2.12895e+08	0	2.5		0	2022-03-28	0.637369		1	0	0	0.6	0.000399445	0.000399445	1	0.362802	0.942507	314500	0.011778	0		1.00013	0.907004	0.000399445	0.000334545	0.000398803	00:00:00	240022	2022-03-28			3.34022e+08	2022-03-28	89249	1
2022-03-29	1.4193e+07	0		0	0.4	0	0	2.12895e+08	0	2.5		0	2022-03-29	0.637358		1	0	0	0.6	0.000398774	0.000398774	1	0.362847	0.942507	314800	0.011778	0		1.00012	0.907117	0.000398774	0.000333765	0.00039813	00:00:00	240022	2022-03-29			3.34028e+08	2022-03-29	107500	1
2022-03-30	1.4193e+07	0		0	0.4	0	0	2.12895e+08	0	2.5		0	2022-03-30	0.637348		1	0	0	0.6	0.000398104	0.000398104	1	0.3629	0.942507	315100	0.011778	0		1.00014	0.907249	0.000398104	0.000332987	0.000397458	00:00:00	240022	2022-03-30			3.34033e+08	2022-03-30	129596	1
2022-03-31	1.4193e+07	0		0	0.4	0	0	2.12895e+08	0	2.5		0	2022-03-31	0.637337		1	0	0	0.6	0.000397436	0.000397436	1	0.362958	0.942507	315400	0.011778	0		1.00016	0.907395	0.000397436	0.000332211	0.000396787	00:00:00	240022	2022-03-31			3.34039e+08	2022-03-31	154679	1
2022-04-01	1.4193e+07	0		0	0.4	0	0	2.12895e+08	0	2.5		0	2022-04-01	0.637327		1	0	0	0.6	0.000396769	0.000396769	1	0.36302	0.942507	315700	0.011778	0		1.00017	0.907549	0.000396769	0.000331436	0.000396117	00:00:00	240022	2022-04-01			3.34044e+08	2022-04-01	181644	1
2022-04-02	1.4193e+07	0		0	0.4	0	0	2.12895e+08	0	2.5		0	2022-04-02	0.637316		1	0	0	0.6	0.000396103	0.000396103	1	0.363086	0.942507	316000	0.011778	0		1.00018	0.907716	0.000396103	0.000330664	0.000395448	00:00:00	240022	2022-04-02			3.3405e+08	2022-04-02	211179	1
2022-04-03	1.4193e+07	0		0	0.4	0	0	2.12895e+08	0	2.5		0	2022-04-03	0.637306		1	0	0	0.6	0.000395439	0.000395439	1	0.363158	0.942507	316300	0.011778	0		1.0002	0.907895	0.000395439	0.000329893	0.000394781	00:00:00	240022	2022-04-03			3.34055e+08	2022-04-03	243179	1
2022-04-04	1.4193e+07	0		0	0.4	0	0	2.12895e+08	0	2.5		0	2022-04-04	0.637295		1	0	0	0.6	0.000394775	0.000394775	1	0.363234	0.942507	316600	0.011778	0		1.00021	0.908085	0.000394775	0.000329125	0.000394115	00:00:00	240022	2022-04-04			3.34061e+08	2022-04-04	277679	1
2022-04-05	1.4193e+07	0		0	0.4	0	0	2.12895e+08	0	2.5		0	2022-04-05	0.637285		1	0	0	0.6	0.000394113	0.000394113	1	0.363294	0.942507	316900	0.011778	0		1.00016	0.908234	0.000394113	0.000328358	0.000393451	00:00:00	240022	2022-04-05			3.34066e+08	2022-04-05	303506	1
2022-04-06	1.4193e+07	0		0	0.4	0	0	2.12895e+08	0	2.5		0	2022-04-06	0.637274		1	0	0	0.6	0.000393453	0.000393453	1	0.363357	0.942507	317200	0.011778	0		1.00017	0.908392	0.000393453	0.000327594	0.000392787	00:00:00	240022	2022-04-06			3.34072e+08	2022-04-06	331207	1
2022-04-07	1.4193e+07	0		0	0.4	0	0	2.12895e+08	0	2.5		0	2022-04-07	0.637264		1	0	0	0.6	0.000392793	0.000392793	1	0.363426	0.942507	317500	0.011778	0		1.00019	0.908566	0.000392793	0.000326831	0.000392125	00:00:00	240022	2022-04-07			3.34077e+08	2022-04-07	362179	1
2022-04-08	1.4193e+07	0		0	0.4	0	0	2.12895e+08	0	2.5		0	2022-04-08	0.637253		1	0	0	0.6	0.000392135	0.000392135	1	0.363497	0.942507	317800	0.011778	0		1.00019	0.908743	0.000392135	0.00032607	0.000391464	00:00:00	240022	2022-04-08			3.34083e+08	2022-04-08	393838	1
2022-04-09	1.4193e+07	0		0	0.4	0	0	2.12895e+08	0	2.5		0	2022-04-09	0.637243		1	0	0	0.6	0.000391478	0.000391478	1	0.363583	0.942507	318100	0.011778	0		1.00024	0.908958	0.000391478	0.000325311	0.000390804	00:00:00	240022	2022-04-09			3.34088e+08	2022-04-09	433725	1
2022-04-10	1.4193e+07	0		0	0.4	0	0	2.12895e+08	0	2.5		0	2022-04-10	0.637232		1	0	0	0.6	0.000390822	0.000390822	1	0.363661	0.942507	318400	0.011778	0		1.00021	0.909153	0.000390822	0.000324554	0.000390146	00:00:00	240022	2022-04-10			3.34094e+08	2022-04-10	469179	1
2022-04-11	1.4193e+07	0		0	0.4	0	0	2.12895e+08	0	2.5		0	2022-04-11	0.637222		1	0	0	0.6	0.000390167	0.000390167	1	0.363727	0.942507	318700	0.011778	0		1.00018	0.909318	0.000390167	0.000323799	0.000389489	00:00:00	240022	2022-04-11			3.34099e+08	2022-04-11	498436	1
2022-04-12	1.4193e+07	0		0	0.4	0	0	2.12895e+08	0	2.5		0	2022-04-12	0.637211		1	0	0	0.6	0.000389514	0.000389514	1	0.363793	0.942507	319000	0.011778	0		1.00018	0.909483	0.000389514	0.000323046	0.000388833	00:00:00	240022	2022-04-12			3.34105e+08	2022-04-12	527581	1
2022-04-13	1.4193e+07	0		0	0.4	0	0	2.12895e+08	0	2.5		0	2022-04-13	0.637201		1	0	0	0.6	0.000388862	0.000388862	1	0.363851	0.942507	319300	0.011778	0		1.00016	0.909627	0.000388862	0.000322294	0.000388178	00:00:00	240022	2022-04-13			3.3411e+08	2022-04-13	552469	1
2022-04-14	1.4193e+07	0		0	0.4	0	0	2.12895e+08	0	2.5		0	2022-04-14	0.63719		1	0	0	0.6	0.000388211	0.000388211	1	0.363912	0.942507	319600	0.011778	0		1.00017	0.909779	0.000388211	0.000321545	0.000387525	00:00:00	240022	2022-04-14			3.34116e+08	2022-04-14	578924	1
2022-04-15	1.4193e+07	0		0	0.4	0	0	2.12895e+08	0	2.5		0	2022-04-15	0.63718		1	0	0	0.6	0.000387561	0.000387561	1	0.363983	0.942507	319900	0.011778	0		1.0002	0.909959	0.000387561	0.000320797	0.000386873	00:00:00	240022	2022-04-15			3.34121e+08	2022-04-15	611204	1
2022-04-16	1.4193e+07	0		0	0.4	0	0	2.12895e+08	0	2.5		0	2022-04-16	0.63717		1	0	0	0.6	0.000386913	0.000386913	1	0.364055	0.942507	320200	0.011778	0		1.0002	0.910138	0.000386913	0.000320051	0.000386222	00:00:00	240022	2022-04-16			3.34127e+08	2022-04-16	643518	1
2022-04-17	1.4193e+07	0		0	0.4	0	0	2.12895e+08	0	2.5		0	2022-04-17	0.637159		1	0	0	0.6	0.000386266	0.000386266	1	0.364128	0.942507	320500	0.011778	0		1.0002	0.91032	0.000386266	0.000319307	0.000385572	00:00:00	240022	2022-04-17			3.34132e+08	2022-04-17	676380	1
2022-04-18	1.4193e+07	0		0	0.4	0	0	2.12895e+08	0	2.5		0	2022-04-18	0.637149		1	0	0	0.6	0.00038562	0.00038562	1	0.364191	0.942507	320800	0.011778	0		1.00017	0.910478	0.00038562	0.000318565	0.000384924	00:00:00	240022	2022-04-18			3.34138e+08	2022-04-18	704202	1
2022-04-19	1.4193e+07	0		0	0.4	0	0	2.12895e+08	0	2.5		0	2022-04-19	0.637138		1	0	0	0.6	0.000384975	0.000384975	1	0.364254	0.942507	321100	0.011778	0		1.00017	0.910634	0.000384975	0.000317825	0.000384276	00:00:00	240022	2022-04-19			3.34143e+08	2022-04-19	731444	1
2022-04-20	1.4193e+07	0		0	0.4	0	0	2.12895e+08	0	2.5		0	2022-04-20	0.637128		1	0	0	0.6	0.000384331	0.000384331	1	0.364318	0.942507	321400	0.011778	0		1.00018	0.910795	0.000384331	0.000317087	0.00038363	00:00:00	240022	2022-04-20			3.34149e+08	2022-04-20	759938	1
2022-04-21	1.4193e+07	0		0	0.4	0	0	2.12895e+08	0	2.5		0	2022-04-21	0.637117		1	0	0	0.6	0.000383689	0.000383689	1	0.364373	0.942507	321700	0.011778	0		1.00015	0.910933	0.000383689	0.00031635	0.000382985	00:00:00	240022	2022-04-21			3.34154e+08	2022-04-21	783564	1
2022-04-22	1.4193e+07	0		0	0.4	0	0	2.12895e+08	0	2.5		0	2022-04-22	0.637107		1	0	0	0.6	0.000383048	0.000383048	1	0.364446	0.942507	322000	0.011778	0		1.0002	0.911114	0.000383048	0.000315616	0.000382342	00:00:00	240022	2022-04-22			3.3416e+08	2022-04-22	816173	1
2022-04-23	1.4193e+07	0		0	0.4	0	0	2.12895e+08	0	2.5		0	2022-04-23	0.637096		1	0	0	0.6	0.000382408	0.000382408	1	0.364514	0.942507	322300	0.011778	0		1.00019	0.911284	0.000382408	0.000314883	0.000381699	00:00:00	240022	2022-04-23			3.34165e+08	2022-04-23	846609	1
2022-04-24	1.4193e+07	0		0	0.4	0	0	2.12895e+08	0	2.5		0	2022-04-24	0.637086		1	0	0	0.6	0.000381769	0.000381769	1	0.364611	0.942507	322600	0.011778	0		1.00027	0.911527	0.000381769	0.000314152	0.000381058	00:00:00	240022	2022-04-24			3.34171e+08	2022-04-24	892217	1
2022-04-25	1.4193e+07	0		0	0.4	0	0	2.12895e+08	0	2.5		0	2022-04-25	0.637075		1	0	0	0.6	0.000381131	0.000381131	1	0.364688	0.942507	322900	0.011778	0		1.00021	0.911721	0.000381131	0.000313422	0.000380418	00:00:00	240022	2022-04-25			3.34176e+08	2022-04-25	927704	1
2022-04-26	1.4193e+07	0		0	0.4	0	0	2.12895e+08	0	2.5		0	2022-04-26	0.637065		1	0	0	0.6	0.000380495	0.000380495	1	0.36475	0.942507	323200	0.011778	0		1.00017	0.911874	0.000380495	0.000312695	0.000379779	00:00:00	240022	2022-04-26			3.34182e+08	2022-04-26	954501	1
2022-04-27	1.4193e+07	0		0	0.4	0	0	2.12895e+08	0	2.5		0	2022-04-27	0.637054		1	0	0	0.6	0.00037986	0.00037986	1	0.364804	0.942507	323500	0.011778	0		1.00015	0.912009	0.00037986	0.000311969	0.000379142	00:00:00	240022	2022-04-27			3.34187e+08	2022-04-27	977535	1
2022-04-28	1.4193e+07	0		0	0.4	0	0	2.12895e+08	0	2.5		0	2022-04-28	0.637044		1	0	0	0.6	0.000379226	0.000379226	1	0.364862	0.942507	323800	0.011778	0		1.00016	0.912156	0.000379226	0.000311245	0.000378505	00:00:00	240022	2022-04-28			3.34193e+08	2022-04-28	1002944	1
2022-04-29	1.4193e+07	0		0	0.4	0	0	2.12895e+08	0	2.5		0	2022-04-29	0.637033		1	0	0	0.6	0.000378593	0.000378593	1	0.364927	0.942507	324100	0.011778	0		1.00018	0.912316	0.000378593	0.000310523	0.00037787	00:00:00	240022	2022-04-29			3.34198e+08	2022-04-29	1031373	1
2022-04-30	1.4193e+07	0		0	0.4	0	0	2.12895e+08	0	2.5		0	2022-04-30	0.637023		1	0	0	0.6	0.000377962	0.000377962	1	0.364994	0.942507	324400	0.011778	0		1.00019	0.912486	0.000377962	0.000309803	0.000377236	00:00:00	240022	2022-04-30			3.34203e+08	2022-04-30	1061643	1
2022-05-01	1.4193e+07	0		0	0.4	0	0	2.12895e+08	0	2.45312		0	2022-05-01	0.637012		1	0	0	0.559305	0.000377331	0.000377331	1	0.365072	0.942507	324700	0.011778	0		1.00021	0.895567	0.000377331	0.000309085	0.000376603	00:00:00	240022	2022-05-01			3.34209e+08	2022-05-01	1097061	0.925
2022-05-02	1.4193e+07	0		0	0.4	0	0	2.12895e+08	0	2.44141		0	2022-05-02	0.637002		1	0	0	0.557189	0.000376702	0.000376702	1	0.365141	0.942507	325000	0.011778	0		1.00019	0.891457	0.000376702	0.000308368	0.000375972	00:00:00	240022	2022-05-02			3.34214e+08	2022-05-02	1127953	0.925
2022-05-03	1.4193e+07	0		0	0.4	0	0	2.12895e+08	0	2.42676		0	2022-05-03	0.636992		1	0	0	0.554516	0.000376074	0.000376074	1	0.365199	0.942507	325300	0.011778	0		1.00016	0.886249	0.000376074	0.000307653	0.000375341	00:00:00	240022	2022-05-03			3.3422e+08	2022-05-03	1153252	0.925
2022-05-04	1.4193e+07	0		0	0.4	0	0	2.12895e+08	0	2.40845		0	2022-05-04	0.636981		1	0	0	0.551129	0.000375447	0.000375447	1	0.365255	0.942507	325600	0.011778	0		1.00015	0.879698	0.000375447	0.00030694	0.000374712	00:00:00	240022	2022-05-04			3.34225e+08	2022-05-04	1177446	0.925
2022-05-05	1.4193e+07	0		0	0.4	0	0	2.12895e+08	0	2.39728		0	2022-05-05	0.636971		1	0	0	0.549038	0.000374821	0.000374821	1	0.365314	0.942507	325900	0.011778	0		1.00016	0.87576	0.000374821	0.000306229	0.000374084	00:00:00	240022	2022-05-05			3.34231e+08	2022-05-05	1203320	0.925
2022-05-06	1.4193e+07	0		0	0.4	0	0	2.12895e+08	0	2.38625		0	2022-05-06	0.63696		1	0	0	0.546953	0.000374197	0.000374197	1	0.365376	0.942507	326200	0.011778	0		1.00017	0.871877	0.000374197	0.000305519	0.000373457	00:00:00	240022	2022-05-06			3.34236e+08	2022-05-06	1230271	0.925
2022-05-07	1.4193e+07	0		0	0.4	0	0	2.12895e+08	0	2.37612		0	2022-05-07	0.63695		1	0	0	0.545022	0.000373573	0.000373573	1	0.365442	0.942507	326500	0.011778	0		1.00018	0.868333	0.000373573	0.000304811	0.000372832	00:00:00	240022	2022-05-07			3.34242e+08	2022-05-07	1259802	0.925
2022-05-08	1.4193e+07	0		0	0.4	0	0	2.12895e+08	0	2.36804		0	2022-05-08	0.636939		1	0	0	0.543469	0.000372951	0.000372951	1	0.365507	0.942507	326800	0.011778	0		1.00018	0.865534	0.000372951	0.000304105	0.000372207	00:00:00	240022	2022-05-08			3.34247e+08	2022-05-08	1288676	0.925
2022-05-09	1.4193e+07	0		0	0.4	0	0	2.12895e+08	0	2.36072		0	2022-05-09	0.636929		1	0	0	0.542055	0.00037233	0.00037233	1	0.365566	0.942507	327100	0.011778	0		1.00016	0.863001	0.00037233	0.000303401	0.000371584	00:00:00	240022	2022-05-09			3.34253e+08	2022-05-09	1314488	0.925
2022-05-10	1.4193e+07	0		0	0.4	0	0	2.12895e+08	0	2.35434		0	2022-05-10	0.636918		1	0	0	0.540814	0.00037171	0.00037171	1	0.365615	0.942507	327400	0.011778	0		1.00013	0.860783	0.00037171	0.000302698	0.000370961	00:00:00	240022	2022-05-10			3.34258e+08	2022-05-10	1334585	0.925
2022-05-11	1.4193e+07	0		0	0.4	0	0	2.12895e+08	0	2.3489		0	2022-05-11	0.636908		1	0	0	0.53975	0.000371091	0.000371091	1	0.365656	0.942507	327700	0.011778	0		1.00011	0.858891	0.000371091	0.000301998	0.00037034	00:00:00	240022	2022-05-11			3.34264e+08	2022-05-11	1351212	0.925
2022-05-12	1.4193e+07	0		0	0.4	0	0	2.12895e+08	0	2.34412		0	2022-05-12	0.636897		1	0	0	0.538811	0.000370474	0.000370474	1	0.365713	0.942507	328000	0.011778	0		1.00016	0.857275	0.000370474	0.000301298	0.000369721	00:00:00	240022	2022-05-12			3.34269e+08	2022-05-12	1375815	0.925
2022-05-13	1.4193e+07	0		0	0.4	0	0	2.12895e+08	0	2.33997		0	2022-05-13	0.636887		1	0	0	0.537993	0.000369857	0.000369857	1	0.365765	0.942507	328300	0.011778	0		1.00014	0.855877	0.000369857	0.000300601	0.000369102	00:00:00	240022	2022-05-13			3.34275e+08	2022-05-13	1397527	0.925
2022-05-14	1.4193e+07	0		0	0.4	0	0	2.12895e+08	0	2.33637		0	2022-05-14	0.636876		1	0	0	0.537282	0.000369242	0.000369242	1	0.36582	0.942507	328600	0.011778	0		1.00015	0.854692	0.000369242	0.000299905	0.000368484	00:00:00	240022	2022-05-14			3.3428e+08	2022-05-14	1421509	0.925
2022-05-15	1.4193e+07	0		0	0.4	0	0	2.12895e+08	0	2.33324		0	2022-05-15	0.636866		1	0	0	0.536661	0.000368628	0.000368628	1	0.365867	0.942507	328900	0.011778	0		1.00013	0.853656	0.000368628	0.000299211	0.000367868	00:00:00	240022	2022-05-15			3.34286e+08	2022-05-15	1.44078e+06	0.925
2022-05-16	1.4193e+07	0		0	0.4	0	0	2.12895e+08	0	2.33052		0	2022-05-16	0.636855		1	0	0	0.53612	0.000368015	0.000368015	1	0.365913	0.942507	329200	0.011778	0		1.00012	0.852766	0.000368015	0.000298519	0.000367253	00:00:00	240022	2022-05-16			3.34291e+08	2022-05-16	1.45934e+06	0.925
2022-05-17	1.4193e+07	0		0	0.4	0	0	2.12895e+08	0	2.32816		0	2022-05-17	0.636845		1	0	0	0.535649	0.000367403	0.000367403	1	0.365959	0.942507	329500	0.011778	0		1.00013	0.852009	0.000367403	0.000297829	0.000366639	00:00:00	240022	2022-05-17			3.34297e+08	2022-05-17	1.47813e+06	0.925
2022-05-18	1.4193e+07	0		0	0.4	0	0	2.12895e+08	0	2.3261		0	2022-05-18	0.636834		1	0	0	0.53524	0.000366792	0.000366792	1	0.366006	0.942507	329800	0.011778	0		1.00013	0.851368	0.000366792	0.00029714	0.000366026	00:00:00	240022	2022-05-18			3.34302e+08	2022-05-18	1.49769e+06	0.925
2022-05-19	1.4193e+07	0		0	0.4	0	0	2.12895e+08	0	2.32432		0	2022-05-19	0.636824		1	0	0	0.534883	0.000366182	0.000366182	1	0.366052	0.942507	330100	0.011778	0		1.00013	0.850822	0.000366182	0.000296453	0.000365414	00:00:00	240022	2022-05-19			3.34308e+08	2022-05-19	1.51675e+06	0.925
2022-05-20	1.4193e+07	0		0	0.4	0	0	2.12895e+08	0	2.32277		0	2022-05-20	0.636814		1	0	0	0.534573	0.000365574	0.000365574	1	0.366098	0.942507	330400	0.011778	0		1.00013	0.850362	0.000365574	0.000295767	0.000364803	00:00:00	240022	2022-05-20			3.34313e+08	2022-05-20	1.53566e+06	0.925
2022-05-21	1.4193e+07	0		0	0.4	0	0	2.12895e+08	0	2.32142		0	2022-05-21	0.636803		1	0	0	0.534303	0.000364967	0.000364967	1	0.366143	0.942507	330700	0.011778	0		1.00012	0.849974	0.000364967	0.000295084	0.000364194	00:00:00	240022	2022-05-21			3.34319e+08	2022-05-21	1.554e+06	0.925
2022-05-22	1.4193e+07	0		0	0.4	0	0	2.12895e+08	0	2.32025		0	2022-05-22	0.636793		1	0	0	0.534068	0.00036436	0.00036436	1	0.366188	0.942507	331000	0.011778	0		1.00012	0.84965	0.00036436	0.000294402	0.000363585	00:00:00	240022	2022-05-22			3.34324e+08	2022-05-22	1.57236e+06	0.925
2022-05-23	1.4193e+07	0		0	0.4	0	0	2.12895e+08	0	2.31924		0	2022-05-23	0.636782		1	0	0	0.533863	0.000363755	0.000363755	1	0.366234	0.942507	331300	0.011778	0		1.00012	0.849382	0.000363755	0.000293721	0.000362978	00:00:00	240022	2022-05-23			3.3433e+08	2022-05-23	1.59086e+06	0.925
2022-05-24	1.4193e+07	0		0	0.4	0	0	2.12895e+08	0	2.31835		0	2022-05-24	0.636772		1	0	0	0.533686	0.000363151	0.000363151	1	0.366279	0.942507	331600	0.011778	0		1.00012	0.849164	0.000363151	0.000293042	0.000362372	00:00:00	240022	2022-05-24			3.34335e+08	2022-05-24	1.60943e+06	0.925
2022-05-25	1.4193e+07	0		0	0.4	0	0	2.12895e+08	0	2.31759		0	2022-05-25	0.636761		1	0	0	0.533531	0.000362548	0.000362548	1	0.366324	0.942507	331900	0.011778	0		1.00012	0.848988	0.000362548	0.000292365	0.000361767	00:00:00	240022	2022-05-25			3.34341e+08	2022-05-25	1.62796e+06	0.925
2022-05-26	1.4193e+07	0		0	0.4	0	0	2.12895e+08	0	2.31692		0	2022-05-26	0.636751		1	0	0	0.533397	0.000361947	0.000361947	1	0.36637	0.942507	332200	0.011778	0		1.00012	0.848849	0.000361947	0.00029169	0.000361163	00:00:00	240022	2022-05-26			3.34346e+08	2022-05-26	1.6465e+06	0.925
2022-05-27	1.4193e+07	0		0	0.4	0	0	2.12895e+08	0	2.31634		0	2022-05-27	0.63674		1	0	0	0.53328	0.000361346	0.000361346	1	0.366415	0.942507	332500	0.011778	0		1.00012	0.848742	0.000361346	0.000291016	0.00036056	00:00:00	240022	2022-05-27			3.34352e+08	2022-05-27	1.66506e+06	0.925
2022-05-28	1.4193e+07	0		0	0.4	0	0	2.12895e+08	0	2.31584		0	2022-05-28	0.63673		1	0	0	0.533179	0.000360747	0.000360747	1	0.366461	0.942507	332800	0.011778	0		1.00012	0.848663	0.000360747	0.000290344	0.000359959	00:00:00	240022	2022-05-28			3.34357e+08	2022-05-28	1.68372e+06	0.925
2022-05-29	1.4193e+07	0		0	0.4	0	0	2.12895e+08	0	2.3154		0	2022-05-29	0.636719		1	0	0	0.533091	0.000360148	0.000360148	1	0.366506	0.942507	333100	0.011778	0		1.00012	0.848608	0.000360148	0.000289674	0.000359358	00:00:00	240022	2022-05-29			3.34363e+08	2022-05-29	1.70249e+06	0.925
2022-05-30	1.4193e+07	0		0	0.4	0	0	2.12895e+08	0	2.31502		0	2022-05-30	0.636709		1	0	0	0.533014	0.000359551	0.000359551	1	0.366552	0.942507	333400	0.011778	0		1.00013	0.848575	0.000359551	0.000289005	0.000358759	00:00:00	240022	2022-05-30			3.34368e+08	2022-05-30	1.72135e+06	0.925
2022-05-31	1.4193e+07	0		0	0.4	0	0	2.12895e+08	0	2.31469		0	2022-05-31	0.636698		1	0	0	0.532947	0.000358955	0.000358955	1	0.366598	0.942507	333700	0.011778	0		1.00013	0.848561	0.000358955	0.000288338	0.000358161	00:00:00	240022	2022-05-31			3.34374e+08	2022-05-31	1.7403e+06	0.925
2022-06-01	1.4193e+07	0		0	0.4	0	0	2.12895e+08	0	2.26753		0	2022-06-01	0.636688		1	0	0	0.481166	0.00035836	0.00035836	1	0.366641	0.942507	334000	0.011778	0		1.00012	0.831369	0.00035836	0.000287673	0.000357564	00:00:00	240022	2022-06-01			3.34379e+08	2022-06-01	1.75767e+06	0.85
2022-06-02	1.4193e+07	0		0	0.4	0	0	2.12895e+08	0	2.25556		0	2022-06-02	0.636677		1	0	0	0.478413	0.000357766	0.000357766	1	0.366684	0.942507	334300	0.011778	0		1.00012	0.827077	0.000357766	0.000287009	0.000356968	00:00:00	240022	2022-06-02			3.34385e+08	2022-06-02	1.77485e+06	0.85
2022-06-03	1.4193e+07	0		0	0.4	0	0	2.12895e+08	0	2.24069		0	2022-06-03	0.636667		1	0	0	0.474952	0.000357173	0.000357173	1	0.366726	0.942507	334600	0.011778	0		1.00012	0.821721	0.000357173	0.000286347	0.000356373	00:00:00	240022	2022-06-03			3.3439e+08	2022-06-03	1.79179e+06	0.85
2022-06-04	1.4193e+07	0		0	0.4	0	0	2.12895e+08	0	2.22219		0	2022-06-04	0.636657		1	0	0	0.470582	0.000356581	0.000356581	1	0.366768	0.942507	334900	0.011778	0		1.00011	0.81503	0.000356581	0.000285686	0.000355779	00:00:00	240022	2022-06-04			3.34396e+08	2022-06-04	1.80842e+06	0.85
2022-06-05	1.4193e+07	0		0	0.4	0	0	2.12895e+08	0	2.21086		0	2022-06-05	0.636646		1	0	0	0.467868	0.00035599	0.00035599	1	0.366809	0.942507	335200	0.011778	0		1.00011	0.810964	0.00035599	0.000285027	0.000355186	00:00:00	240022	2022-06-05			3.34401e+08	2022-06-05	1.82471e+06	0.85
2022-06-06	1.4193e+07	0		0	0.4	0	0	2.12895e+08	0	2.19969		0	2022-06-06	0.636636		1	0	0	0.465165	0.000355401	0.000355401	1	0.366849	0.942507	335500	0.011778	0		1.00011	0.806954	0.000355401	0.00028437	0.000354594	00:00:00	240022	2022-06-06			3.34407e+08	2022-06-06	1.84058e+06	0.85
2022-06-07	1.4193e+07	0		0	0.4	0	0	2.12895e+08	0	2.18944		0	2022-06-07	0.636625		1	0	0	0.46266	0.000354812	0.000354812	1	0.366889	0.942507	335800	0.011778	0		1.00011	0.803279	0.000354812	0.000283714	0.000354004	00:00:00	240022	2022-06-07			3.34412e+08	2022-06-07	1.85596e+06	0.85
2022-06-08	1.4193e+07	0		0	0.4	0	0	2.12895e+08	0	2.18125		0	2022-06-08	0.636615		1	0	0	0.460643	0.000354225	0.000354225	1	0.366927	0.942507	336100	0.011778	0		1.00011	0.800359	0.000354225	0.00028306	0.000353415	00:00:00	240022	2022-06-08			3.34418e+08	2022-06-08	1.87101e+06	0.85
2022-06-09	1.4193e+07	0		0	0.4	0	0	2.12895e+08	0	2.17384		0	2022-06-09	0.636604		1	0	0	0.458806	0.000353638	0.000353638	1	0.366965	0.942507	336400	0.011778	0		1.0001	0.797725	0.000353638	0.000282408	0.000352826	00:00:00	240022	2022-06-09			3.34423e+08	2022-06-09	1.88573e+06	0.85
2022-06-10	1.4193e+07	0		0	0.4	0	0	2.12895e+08	0	2.16738		0	2022-06-10	0.636594		1	0	0	0.457193	0.000353053	0.000353053	1	0.367003	0.942507	336700	0.011778	0		1.0001	0.795435	0.000353053	0.000281757	0.000352239	00:00:00	240022	2022-06-10			3.34429e+08	2022-06-10	1.90008e+06	0.85
2022-06-11	1.4193e+07	0		0	0.4	0	0	2.12895e+08	0	2.16187		0	2022-06-11	0.636583		1	0	0	0.455808	0.000352469	0.000352469	1	0.367039	0.942507	337000	0.011778	0		1.0001	0.79349	0.000352469	0.000281108	0.000351653	00:00:00	240022	2022-06-11			3.34434e+08	2022-06-11	1.91408e+06	0.85
2022-06-12	1.4193e+07	0		0	0.4	0	0	2.12895e+08	0	2.15702		0	2022-06-12	0.636573		1	0	0	0.454586	0.000351886	0.000351886	1	0.367075	0.942507	337300	0.011778	0		1.0001	0.79179	0.000351886	0.00028046	0.000351068	00:00:00	240022	2022-06-12			3.3444e+08	2022-06-12	1.92771e+06	0.85
2022-06-13	1.4193e+07	0		0	0.4	0	0	2.12895e+08	0	2.15282		0	2022-06-13	0.636562		1	0	0	0.453521	0.000351304	0.000351304	1	0.367111	0.942507	337600	0.011778	0		1.0001	0.790322	0.000351304	0.000279814	0.000350484	00:00:00	240022	2022-06-13			3.34445e+08	2022-06-13	1.94098e+06	0.85
2022-06-14	1.4193e+07	0		0	0.4	0	0	2.12895e+08	0	2.14918		0	2022-06-14	0.636552		1	0	0	0.452595	0.000350723	0.000350723	1	0.367145	0.942507	337900	0.011778	0		1.00009	0.78906	0.000350723	0.000279169	0.000349901	00:00:00	240022	2022-06-14			3.34451e+08	2022-06-14	1.95393e+06	0.85
2022-06-15	1.4193e+07	0		0	0.4	0	0	2.12895e+08	0	2.146		0	2022-06-15	0.636541		1	0	0	0.451786	0.000350143	0.000350143	1	0.367181	0.942507	338200	0.011778	0		1.0001	0.787971	0.000350143	0.000278526	0.000349319	00:00:00	240022	2022-06-15			3.34456e+08	2022-06-15	1.96717e+06	0.85
2022-06-16	1.4193e+07	0		0	0.4	0	0	2.12895e+08	0	2.14325		0	2022-06-16	0.636531		1	0	0	0.451081	0.000349564	0.000349564	1	0.367216	0.942507	338500	0.011778	0		1.0001	0.787035	0.000349564	0.000277885	0.000348738	00:00:00	240022	2022-06-16			3.34462e+08	2022-06-16	1.98033e+06	0.85
2022-06-17	1.4193e+07	0		0	0.4	0	0	2.12895e+08	0	2.14086		0	2022-06-17	0.63652		1	0	0	0.450468	0.000348986	0.000348986	1	0.367251	0.942507	338800	0.011778	0		1.0001	0.786232	0.000348986	0.000277245	0.000348159	00:00:00	240022	2022-06-17			3.34467e+08	2022-06-17	1.99347e+06	0.85
2022-06-18	1.4193e+07	0		0	0.4	0	0	2.12895e+08	0	2.13878		0	2022-06-18	0.63651		1	0	0	0.449933	0.00034841	0.00034841	1	0.367286	0.942507	339100	0.011778	0		1.0001	0.785543	0.00034841	0.000276607	0.00034758	00:00:00	240022	2022-06-18			3.34473e+08	2022-06-18	2.0067e+06	0.85
2022-06-19	1.4193e+07	0		0	0.4	0	0	2.12895e+08	0	2.13697		0	2022-06-19	0.6365		1	0	0	0.449468	0.000347834	0.000347834	1	0.367321	0.942507	339400	0.011778	0		1.0001	0.784955	0.000347834	0.00027597	0.000347002	00:00:00	240022	2022-06-19			3.34478e+08	2022-06-19	2.02e+06	0.85
2022-06-20	1.4193e+07	0		0	0.4	0	0	2.12895e+08	0	2.1354		0	2022-06-20	0.636489		1	0	0	0.449064	0.00034726	0.00034726	1	0.367357	0.942507	339700	0.011778	0		1.0001	0.784455	0.00034726	0.000275335	0.000346426	00:00:00	240022	2022-06-20			3.34484e+08	2022-06-20	2.03343e+06	0.85
2022-06-21	1.4193e+07	0		0	0.4	0	0	2.12895e+08	0	2.13404		0	2022-06-21	0.636479		1	0	0	0.448711	0.000346686	0.000346686	1	0.367393	0.942507	340000	0.011778	0		1.0001	0.78403	0.000346686	0.000274702	0.000345851	00:00:00	240022	2022-06-21			3.34489e+08	2022-06-21	2.04707e+06	0.85
2022-06-22	1.4193e+07	0		0	0.4	0	0	2.12895e+08	0	2.13285		0	2022-06-22	0.636468		1	0	0	0.448405	0.000346114	0.000346114	1	0.367429	0.942507	340300	0.011778	0		1.0001	0.783672	0.000346114	0.00027407	0.000345276	00:00:00	240022	2022-06-22			3.34495e+08	2022-06-22	2.06086e+06	0.85
2022-06-23	1.4193e+07	0		0	0.4	0	0	2.12895e+08	0	2.13182		0	2022-06-23	0.636458		1	0	0	0.448139	0.000345542	0.000345542	1	0.367466	0.942507	340600	0.011778	0		1.0001	0.783372	0.000345542	0.000273439	0.000344703	00:00:00	240022	2022-06-23			3.345e+08	2022-06-23	2.07485e+06	0.85
2022-06-24	1.4193e+07	0		0	0.4	0	0	2.12895e+08	0	2.13093		0	2022-06-24	0.636447		1	0	0	0.447907	0.000344972	0.000344972	1	0.367503	0.942507	340900	0.011778	0		1.0001	0.783122	0.000344972	0.00027281	0.000344131	00:00:00	240022	2022-06-24			3.34506e+08	2022-06-24	2.08907e+06	0.85
2022-06-25	1.4193e+07	0		0	0.4	0	0	2.12895e+08	0	2.13015		0	2022-06-25	0.636437		1	0	0	0.447706	0.000344402	0.000344402	1	0.36754	0.942507	341200	0.011778	0		1.0001	0.782916	0.000344402	0.000272183	0.000343559	00:00:00	240022	2022-06-25			3.34511e+08	2022-06-25	2.10351e+06	0.85
2022-06-26	1.4193e+07	0		0	0.4	0	0	2.12895e+08	0	2.12948		0	2022-06-26	0.636426		1	0	0	0.44753	0.000343834	0.000343834	1	0.367578	0.942507	341500	0.011778	0		1.0001	0.782749	0.000343834	0.000271557	0.000342989	00:00:00	240022	2022-06-26			3.34517e+08	2022-06-26	2.11821e+06	0.85
2022-06-27	1.4193e+07	0		0	0.4	0	0	2.12895e+08	0	2.12889		0	2022-06-27	0.636416		1	0	0	0.447378	0.000343267	0.000343267	1	0.367617	0.942507	341800	0.011778	0		1.0001	0.782615	0.000343267	0.000270933	0.00034242	00:00:00	240022	2022-06-27			3.34522e+08	2022-06-27	2.13318e+06	0.85
2022-06-28	1.4193e+07	0		0	0.4	0	0	2.12895e+08	0	2.12838		0	2022-06-28	0.636405		1	0	0	0.447246	0.000342701	0.000342701	1	0.367656	0.942507	342100	0.011778	0		1.00011	0.782511	0.000342701	0.00027031	0.000341852	00:00:00	240022	2022-06-28			3.34528e+08	2022-06-28	2.14842e+06	0.85
2022-06-29	1.4193e+07	0		0	0.4	0	0	2.12895e+08	0	2.12794		0	2022-06-29	0.636395		1	0	0	0.447131	0.000342136	0.000342136	1	0.367695	0.942507	342400	0.011778	0		1.00011	0.782432	0.000342136	0.000269688	0.000341285	00:00:00	240022	2022-06-29			3.34533e+08	2022-06-29	2.16395e+06	0.85
2022-06-30	1.4193e+07	0		0	0.4	0	0	2.12895e+08	0	2.12755		0	2022-06-30	0.636384		1	0	0	0.447031	0.000341571	0.000341571	1	0.367735	0.942507	342700	0.011778	0		1.00011	0.782375	0.000341571	0.000269069	0.000340719	00:00:00	240022	2022-06-30			3.34539e+08	2022-06-30	2.17978e+06	0.85
2022-07-01	1.4193e+07	0		0	0.4	0	0	2.12895e+08	0	2.12722		0	2022-07-01	0.636374		1	0	0	0.446944	0.000341008	0.000341008	1	0.367776	0.942507	343000	0.011778	0		1.00011	0.782339	0.000341008	0.00026845	0.000340154	00:00:00	240022	2022-07-01			3.34544e+08	2022-07-01	2.19591e+06	0.85
2022-07-02	1.4193e+07	0		0	0.4	0	0	2.12895e+08	0	2.12693		0	2022-07-02	0.636364		1	0	0	0.446868	0.000340446	0.000340446	1	0.367817	0.942507	343300	0.011778	0		1.00011	0.78232	0.000340446	0.000267834	0.000339591	00:00:00	240022	2022-07-02			3.3455e+08	2022-07-02	2.21237e+06	0.85
2022-07-03	1.4193e+07	0		0	0.4	0	0	2.12895e+08	0	2.12667		0	2022-07-03	0.636353		1	0	0	0.446802	0.000339885	0.000339885	1	0.367859	0.942507	343600	0.011778	0		1.00011	0.782316	0.000339885	0.000267218	0.000339028	00:00:00	240022	2022-07-03			3.34555e+08	2022-07-03	2.22915e+06	0.85
2022-07-04	1.4193e+07	0		0	0.4	0	0	2.12895e+08	0	2.12645		0	2022-07-04	0.636343		1	0	0	0.446745	0.000339325	0.000339325	1	0.367901	0.942507	343900	0.011778	0		1.00012	0.782325	0.000339325	0.000266605	0.000338466	00:00:00	240022	2022-07-04			3.34561e+08	2022-07-04	2.24626e+06	0.85
2022-07-05	1.4193e+07	0		0	0.4	0	0	2.12895e+08	0	2.12626		0	2022-07-05	0.636332		1	0	0	0.446696	0.000338766	0.000338766	1	0.367944	0.942507	344200	0.011778	0		1.00012	0.782347	0.000338766	0.000265992	0.000337905	00:00:00	240022	2022-07-05			3.34566e+08	2022-07-05	2.26372e+06	0.85
2022-07-06	1.4193e+07	0		0	0.4	0	0	2.12895e+08	0	2.1261		0	2022-07-06	0.636322		1	0	0	0.446653	0.000338208	0.000338208	1	0.367988	0.942507	344500	0.011778	0		1.00012	0.782379	0.000338208	0.000265382	0.000337345	00:00:00	240022	2022-07-06			3.34572e+08	2022-07-06	2.28151e+06	0.85
2022-07-07	1.4193e+07	0		0	0.4	0	0	2.12895e+08	0	2.12595		0	2022-07-07	0.636311		1	0	0	0.446615	0.000337651	0.000337651	1	0.368032	0.942507	344800	0.011778	0		1.00012	0.78242	0.000337651	0.000264772	0.000336787	00:00:00	240022	2022-07-07			3.34577e+08	2022-07-07	2.29966e+06	0.85
2022-07-08	1.4193e+07	0		0	0.4	0	0	2.12895e+08	0	2.12583		0	2022-07-08	0.636301		1	0	0	0.446583	0.000337095	0.000337095	1	0.368078	0.942507	345100	0.011778	0		1.00012	0.78247	0.000337095	0.000264164	0.000336229	00:00:00	240022	2022-07-08			3.34583e+08	2022-07-08	2.31817e+06	0.85
2022-07-09	1.4193e+07	0		0	0.4	0	0	2.12895e+08	0	2.12572		0	2022-07-09	0.63629		1	0	0	0.446554	0.000336541	0.000336541	1	0.368123	0.942507	345400	0.011778	0		1.00012	0.782527	0.000336541	0.000263558	0.000335672	00:00:00	240022	2022-07-09			3.34588e+08	2022-07-09	2.33704e+06	0.85
2022-07-10	1.4193e+07	0		0	0.4	0	0	2.12895e+08	0	2.12563		0	2022-07-10	0.63628		1	0	0	0.44653	0.000335987	0.000335987	1	0.36817	0.942507	345700	0.011778	0		1.00013	0.782591	0.000335987	0.000262953	0.000335117	00:00:00	240022	2022-07-10			3.34594e+08	2022-07-10	2.35627e+06	0.85
2022-07-11	1.4193e+07	0		0	0.4	0	0	2.12895e+08	0	2.12554		0	2022-07-11	0.636269		1	0	0	0.446508	0.000335434	0.000335434	1	0.368217	0.942507	346000	0.011778	0		1.00013	0.782661	0.000335434	0.00026235	0.000334562	00:00:00	240022	2022-07-11			3.34599e+08	2022-07-11	2.37587e+06	0.85
2022-07-12	1.4193e+07	0		0	0.4	0	0	2.12895e+08	0	2.12547		0	2022-07-12	0.636259		1	0	0	0.44649	0.000334882	0.000334882	1	0.368264	0.942507	346300	0.011778	0		1.00013	0.782736	0.000334882	0.000261748	0.000334009	00:00:00	240022	2022-07-12			3.34605e+08	2022-07-12	2.39585e+06	0.85
2022-07-13	1.4193e+07	0		0	0.4	0	0	2.12895e+08	0	2.12541		0	2022-07-13	0.636249		1	0	0	0.446474	0.000334331	0.000334331	1	0.368313	0.942507	346600	0.011778	0		1.00013	0.782816	0.000334331	0.000261148	0.000333456	00:00:00	240022	2022-07-13			3.3461e+08	2022-07-13	2.4162e+06	0.85
2022-07-14	1.4193e+07	0		0	0.4	0	0	2.12895e+08	0	2.12536		0	2022-07-14	0.636238		1	0	0	0.44646	0.000333781	0.000333781	1	0.368362	0.942507	346900	0.011778	0		1.00013	0.782901	0.000333781	0.000260549	0.000332905	00:00:00	240022	2022-07-14			3.34616e+08	2022-07-14	2.43692e+06	0.85
2022-07-15	1.4193e+07	0		0	0.4	0	0	2.12895e+08	0	2.12531		0	2022-07-15	0.636228		1	0	0	0.446447	0.000333232	0.000333232	1	0.368412	0.942507	347200	0.011778	0		1.00014	0.782989	0.000333232	0.000259951	0.000332354	00:00:00	240022	2022-07-15			3.34621e+08	2022-07-15	2.45803e+06	0.85
2022-07-16	1.4193e+07	0		0	0.4	0	0	2.12895e+08	0	2.12527		0	2022-07-16	0.636217		1	0	0	0.446437	0.000332684	0.000332684	1	0.368462	0.942507	347500	0.011778	0		1.00014	0.783082	0.000332684	0.000259355	0.000331804	00:00:00	240022	2022-07-16			3.34627e+08	2022-07-16	2.47951e+06	0.85
2022-07-17	1.4193e+07	0		0	0.4	0	0	2.12895e+08	0	2.12523		0	2022-07-17	0.636207		1	0	0	0.446428	0.000332138	0.000332138	1	0.368514	0.942507	347800	0.011778	0		1.00014	0.783178	0.000332138	0.00025876	0.000331256	00:00:00	240022	2022-07-17			3.34632e+08	2022-07-17	2.50137e+06	0.85
2022-07-18	1.4193e+07	0		0	0.4	0	0	2.12895e+08	0	2.1252		0	2022-07-18	0.636196		1	0	0	0.44642	0.000331592	0.000331592	1	0.368566	0.942507	348100	0.011778	0		1.00014	0.783277	0.000331592	0.000258167	0.000330708	00:00:00	240022	2022-07-18			3.34638e+08	2022-07-18	2.52362e+06	0.85
2022-07-19	1.4193e+07	0		0	0.4	0	0	2.12895e+08	0	2.12518		0	2022-07-19	0.636186		1	0	0	0.446413	0.000331047	0.000331047	1	0.368618	0.942507	348400	0.011778	0		1.00014	0.783379	0.000331047	0.000257575	0.000330162	00:00:00	240022	2022-07-19			3.34643e+08	2022-07-19	2.54624e+06	0.85
2022-07-20	1.4193e+07	0		0	0.4	0	0	2.12895e+08	0	2.12515		0	2022-07-20	0.636175		1	0	0	0.446407	0.000330503	0.000330503	1	0.368672	0.942507	348700	0.011778	0		1.00014	0.783484	0.000330503	0.000256985	0.000329616	00:00:00	240022	2022-07-20			3.34649e+08	2022-07-20	2.56925e+06	0.85
2022-07-21	1.4193e+07	0		0	0.4	0	0	2.12895e+08	0	2.12513		0	2022-07-21	0.636165		1	0	0	0.446402	0.00032996	0.00032996	1	0.368726	0.942507	349000	0.011778	0		1.00015	0.783591	0.00032996	0.000256396	0.000329072	00:00:00	240022	2022-07-21			3.34654e+08	2022-07-21	2.59263e+06	0.85
2022-07-22	1.4193e+07	0		0	0.4	0	0	2.12895e+08	0	2.12512		0	2022-07-22	0.636154		1	0	0	0.446397	0.000329418	0.000329418	1	0.368781	0.942507	349300	0.011778	0		1.00015	0.783701	0.000329418	0.000255809	0.000328528	00:00:00	240022	2022-07-22			3.3466e+08	2022-07-22	2.61639e+06	0.85
2022-07-23	1.4193e+07	0		0	0.4	0	0	2.12895e+08	0	2.1251		0	2022-07-23	0.636144		1	0	0	0.446393	0.000328877	0.000328877	1	0.368836	0.942507	349600	0.011778	0		1.00015	0.783814	0.000328877	0.000255223	0.000327986	00:00:00	240022	2022-07-23			3.34665e+08	2022-07-23	2.64053e+06	0.85
2022-07-24	1.4193e+07	0		0	0.4	0	0	2.12895e+08	0	2.12509		0	2022-07-24	0.636133		1	0	0	0.44639	0.000328337	0.000328337	1	0.368892	0.942507	349900	0.011778	0		1.00015	0.783928	0.000328337	0.000254638	0.000327444	00:00:00	240022	2022-07-24			3.34671e+08	2022-07-24	2.66504e+06	0.85
2022-07-25	1.4193e+07	0		0	0.4	0	0	2.12895e+08	0	2.12508		0	2022-07-25	0.636123		1	0	0	0.446387	0.000327798	0.000327798	1	0.368949	0.942507	350200	0.011778	0		1.00015	0.784045	0.000327798	0.000254055	0.000326903	00:00:00	240022	2022-07-25			3.34676e+08	2022-07-25	2.68991e+06	0.85
2022-07-26	1.4193e+07	0		0	0.4	0	0	2.12895e+08	0	2.12507		0	2022-07-26	0.636113		1	0	0	0.446384	0.00032726	0.00032726	1	0.369006	0.942507	350500	0.011778	0		1.00016	0.784163	0.00032726	0.000253473	0.000326364	00:00:00	240022	2022-07-26			3.34682e+08	2022-07-26	2.71516e+06	0.85
2022-07-27	1.4193e+07	0		0	0.4	0	0	2.12895e+08	0	2.12506		0	2022-07-27	0.636102		1	0	0	0.446382	0.000326723	0.000326723	1	0.369065	0.942507	350800	0.011778	0		1.00016	0.784284	0.000326723	0.000252893	0.000325825	00:00:00	240022	2022-07-27			3.34687e+08	2022-07-27	2.74076e+06	0.85
2022-07-28	1.4193e+07	0		0	0.4	0	0	2.12895e+08	0	2.12505		0	2022-07-28	0.636092		1	0	0	0.44638	0.000326187	0.000326187	1	0.369123	0.942507	351100	0.011778	0		1.00016	0.784406	0.000326187	0.000252314	0.000325288	00:00:00	240022	2022-07-28			3.34693e+08	2022-07-28	2.76672e+06	0.85
2022-07-29	1.4193e+07	0		0	0.4	0	0	2.12895e+08	0	2.12504		0	2022-07-29	0.636081		1	0	0	0.446378	0.000325652	0.000325652	1	0.369183	0.942507	351400	0.011778	0		1.00016	0.78453	0.000325652	0.000251736	0.000324751	00:00:00	240022	2022-07-29			3.34698e+08	2022-07-29	2.79302e+06	0.85
2022-07-30	1.4193e+07	0		0	0.4	0	0	2.12895e+08	0	2.12504		0	2022-07-30	0.636071		1	0	0	0.446377	0.000325118	0.000325118	1	0.369243	0.942507	351700	0.011778	0		1.00016	0.784655	0.000325118	0.00025116	0.000324215	00:00:00	240022	2022-07-30			3.34704e+08	2022-07-30	2.81968e+06	0.85
2022-07-31	1.4193e+07	0		0	0.4	0	0	2.12895e+08	0	2.12503		0	2022-07-31	0.63606		1	0	0	0.446375	0.000324585	0.000324585	1	0.369304	0.942507	352000	0.011778	0		1.00016	0.784783	0.000324585	0.000250585	0.000323681	00:00:00	240022	2022-07-31			3.34709e+08	2022-07-31	2.84667e+06	0.85
2022-08-01	1.4193e+07	0		0	0.4	0	0	2.12895e+08	0	2.12503		0	2022-08-01	0.63605		1	0	0	0.446374	0.000324053	0.000324053	1	0.369365	0.942507	352300	0.011778	0		1.00017	0.784911	0.000324053	0.000250012	0.000323147	00:00:00	240022	2022-08-01			3.34715e+08	2022-08-01	2.874e+06	0.85
2022-08-02	1.4193e+07	0		0	0.4	0	0	2.12895e+08	0	2.12502		0	2022-08-02	0.636039		1	0	0	0.446373	0.000323522	0.000323522	1	0.369427	0.942507	352600	0.011778	0		1.00017	0.785041	0.000323522	0.00024944	0.000322614	00:00:00	240022	2022-08-02			3.3472e+08	2022-08-02	2.90164e+06	0.85
2022-08-03	1.4193e+07	0		0	0.4	0	0	2.12895e+08	0	2.12502		0	2022-08-03	0.636029		1	0	0	0.446372	0.000322991	0.000322991	1	0.369489	0.942507	352900	0.011778	0		1.00017	0.785173	0.000322991	0.000248869	0.000322082	00:00:00	240022	2022-08-03			3.34726e+08	2022-08-03	2.92961e+06	0.85
2022-08-04	1.4193e+07	0		0	0.4	0	0	2.12895e+08	0	2.12502		0	2022-08-04	0.636018		1	0	0	0.446372	0.000322462	0.000322462	1	0.369553	0.942507	353200	0.011778	0		1.00017	0.785306	0.000322462	0.0002483	0.000321552	00:00:00	240022	2022-08-04			3.34731e+08	2022-08-04	2.95788e+06	0.85
2022-08-05	1.4193e+07	0		0	0.4	0	0	2.12895e+08	0	2.12502		0	2022-08-05	0.636008		1	0	0	0.446371	0.000321934	0.000321934	1	0.369616	0.942507	353500	0.011778	0		1.00017	0.78544	0.000321934	0.000247732	0.000321022	00:00:00	240022	2022-08-05			3.34737e+08	2022-08-05	2.98645e+06	0.85
2022-08-06	1.4193e+07	0		0	0.4	0	0	2.12895e+08	0	2.12501		0	2022-08-06	0.635998		1	0	0	0.44637	0.000321406	0.000321406	1	0.36968	0.942507	353800	0.011778	0		1.00017	0.785576	0.000321406	0.000247165	0.000320493	00:00:00	240022	2022-08-06			3.34742e+08	2022-08-06	3.01531e+06	0.85
2022-08-07	1.4193e+07	0		0	0.4	0	0	2.12895e+08	0	2.12501		0	2022-08-07	0.635987		1	0	0	0.44637	0.00032088	0.00032088	1	0.369745	0.942507	354100	0.011778	0		1.00017	0.785713	0.00032088	0.0002466	0.000319965	00:00:00	240022	2022-08-07			3.34748e+08	2022-08-07	3.04446e+06	0.85
2022-08-08	1.4193e+07	0		0	0.4	0	0	2.12895e+08	0	2.12501		0	2022-08-08	0.635977		1	0	0	0.44637	0.000320355	0.000320355	1	0.36981	0.942507	354400	0.011778	0		1.00018	0.78585	0.000320355	0.000246037	0.000319438	00:00:00	240022	2022-08-08			3.34753e+08	2022-08-08	3.07387e+06	0.85
2022-08-09	1.4193e+07	0		0	0.4	0	0	2.12895e+08	0	2.12501		0	2022-08-09	0.635966		1	0	0	0.446369	0.00031983	0.00031983	1	0.369876	0.942507	354700	0.011778	0		1.00018	0.785989	0.00031983	0.000245474	0.000318912	00:00:00	240022	2022-08-09			3.34759e+08	2022-08-09	3.10353e+06	0.85
2022-08-10	1.4193e+07	0		0	0.4	0	0	2.12895e+08	0	2.12501		0	2022-08-10	0.635956		1	0	0	0.446369	0.000319306	0.000319306	1	0.369942	0.942507	355000	0.011778	0		1.00018	0.786129	0.000319306	0.000244913	0.000318387	00:00:00	240022	2022-08-10			3.34764e+08	2022-08-10	3.13345e+06	0.85
2022-08-11	1.4193e+07	0		0	0.4	0	0	2.12895e+08	0	2.12501		0	2022-08-11	0.635945		1	0	0	0.446369	0.000318784	0.000318784	1	0.370008	0.942507	355300	0.011778	0		1.00018	0.78627	0.000318784	0.000244353	0.000317863	00:00:00	240022	2022-08-11			3.3477e+08	2022-08-11	3.1636e+06	0.85
2022-08-12	1.4193e+07	0		0	0.4	0	0	2.12895e+08	0	2.12501		0	2022-08-12	0.635935		1	0	0	0.446368	0.000318262	0.000318262	1	0.370075	0.942507	355600	0.011778	0		1.00018	0.786412	0.000318262	0.000243795	0.00031734	00:00:00	240022	2022-08-12			3.34775e+08	2022-08-12	3.19397e+06	0.85
2022-08-13	1.4193e+07	0		0	0.4	0	0	2.12895e+08	0	2.12501		0	2022-08-13	0.635924		1	0	0	0.446368	0.000317741	0.000317741	1	0.370142	0.942507	355900	0.011778	0		1.00018	0.786554	0.000317741	0.000243238	0.000316818	00:00:00	240022	2022-08-13			3.34781e+08	2022-08-13	3.22455e+06	0.85
2022-08-14	1.4193e+07	0		0	0.4	0	0	2.12895e+08	0	2.125		0	2022-08-14	0.635914		1	0	0	0.446368	0.000317222	0.000317222	1	0.37021	0.942507	356200	0.011778	0		1.00018	0.786698	0.000317222	0.000242682	0.000316296	00:00:00	240022	2022-08-14			3.34786e+08	2022-08-14	3.25533e+06	0.85
2022-08-15	1.4193e+07	0		0	0.4	0	0	2.12895e+08	0	2.125		0	2022-08-15	0.635903		1	0	0	0.446368	0.000316703	0.000316703	1	0.370279	0.942507	356500	0.011778	0		1.00019	0.786844	0.000316703	0.000242128	0.000315776	00:00:00	240022	2022-08-15			3.34792e+08	2022-08-15	3.28694e+06	0.85
2022-08-16	1.4193e+07	0		0	0.4	0	0	2.12895e+08	0	2.125		0	2022-08-16	0.635893		1	0	0	0.446368	0.000316185	0.000316185	1	0.370349	0.942507	356800	0.011778	0		1.00019	0.786993	0.000316185	0.000241575	0.000315257	00:00:00	240022	2022-08-16			3.34797e+08	2022-08-16	3.319e+06	0.85
2022-08-17	1.4193e+07	0		0	0.4	0	0	2.12895e+08	0	2.125		0	2022-08-17	0.635883		1	0	0	0.446368	0.000315668	0.000315668	1	0.37042	0.942507	357100	0.011778	0		1.00019	0.787143	0.000315668	0.000241023	0.000314738	00:00:00	240022	2022-08-17			3.34803e+08	2022-08-17	3.35158e+06	0.85
2022-08-18	1.4193e+07	0		0	0.4	0	0	2.12895e+08	0	2.125		0	2022-08-18	0.635872		1	0	0	0.446367	0.000315152	0.000315152	1	0.370492	0.942507	357400	0.011778	0		1.00019	0.787296	0.000315152	0.000240473	0.000314221	00:00:00	240022	2022-08-18			3.34808e+08	2022-08-18	3.3848e+06	0.85
2022-08-19	1.4193e+07	0		0	0.4	0	0	2.12895e+08	0	2.125		0	2022-08-19	0.635862		1	0	0	0.446367	0.000314637	0.000314637	1	0.370565	0.942507	357700	0.011778	0		1.0002	0.787452	0.000314637	0.000239924	0.000313704	00:00:00	240022	2022-08-19			3.34814e+08	2022-08-19	3.41861e+06	0.85
2022-08-20	1.4193e+07	0		0	0.4	0	0	2.12895e+08	0	2.125		0	2022-08-20	0.635851		1	0	0	0.446367	0.000314123	0.000314123	1	0.37064	0.942507	358000	0.011778	0		1.0002	0.78761	0.000314123	0.000239377	0.000313189	00:00:00	240022	2022-08-20			3.34819e+08	2022-08-20	3.4531e+06	0.85
2022-08-21	1.4193e+07	0		0	0.4	0	0	2.12895e+08	0	2.125		0	2022-08-21	0.635841		1	0	0	0.446367	0.000313609	0.000313609	1	0.370715	0.942507	358300	0.011778	0		1.0002	0.787771	0.000313609	0.00023883	0.000312674	00:00:00	240022	2022-08-21			3.34825e+08	2022-08-21	3.48833e+06	0.85
2022-08-22	1.4193e+07	0		0	0.4	0	0	2.12895e+08	0	2.125		0	2022-08-22	0.63583		1	0	0	0.446367	0.000313097	0.000313097	1	0.370792	0.942507	358600	0.011778	0		1.00021	0.787935	0.000313097	0.000238285	0.00031216	00:00:00	240022	2022-08-22			3.3483e+08	2022-08-22	3.52427e+06	0.85
2022-08-23	1.4193e+07	0		0	0.4	0	0	2.12895e+08	0	2.125		0	2022-08-23	0.63582		1	0	0	0.446367	0.000312586	0.000312586	1	0.370871	0.942507	358900	0.011778	0		1.00021	0.788101	0.000312586	0.000237741	0.000311647	00:00:00	240022	2022-08-23			3.34836e+08	2022-08-23	3.56093e+06	0.85
2022-08-24	1.4193e+07	0		0	0.4	0	0	2.12895e+08	0	2.125		0	2022-08-24	0.635809		1	0	0	0.446367	0.000312075	0.000312075	1	0.370951	0.942507	359200	0.011778	0		1.00022	0.788271	0.000312075	0.000237199	0.000311135	00:00:00	240022	2022-08-24			3.34841e+08	2022-08-24	3.59835e+06	0.85
2022-08-25	1.4193e+07	0		0	0.4	0	0	2.12895e+08	0	2.125		0	2022-08-25	0.635799		1	0	0	0.446367	0.000311565	0.000311565	1	0.371032	0.942507	359500	0.011778	0		1.00022	0.788443	0.000311565	0.000236658	0.000310624	00:00:00	240022	2022-08-25			3.34847e+08	2022-08-25	3.63653e+06	0.85
2022-08-26	1.4193e+07	0		0	0.4	0	0	2.12895e+08	0	2.125		0	2022-08-26	0.635788		1	0	0	0.446367	0.000311057	0.000311057	1	0.371114	0.942507	359800	0.011778	0		1.00022	0.788619	0.000311057	0.000236118	0.000310114	00:00:00	240022	2022-08-26			3.34852e+08	2022-08-26	3.67549e+06	0.85
2022-08-27	1.4193e+07	0		0	0.4	0	0	2.12895e+08	0	2.125		0	2022-08-27	0.635778		1	0	0	0.446367	0.000310549	0.000310549	1	0.371198	0.942507	360100	0.011778	0		1.00023	0.788797	0.000310549	0.00023558	0.000309605	00:00:00	240022	2022-08-27			3.34858e+08	2022-08-27	3.71524e+06	0.85
2022-08-28	1.4193e+07	0		0	0.4	0	0	2.12895e+08	0	2.125		0	2022-08-28	0.635768		1	0	0	0.446367	0.000310042	0.000310042	1	0.371284	0.942507	360400	0.011778	0		1.00023	0.788979	0.000310042	0.000235042	0.000309097	00:00:00	240022	2022-08-28			3.34863e+08	2022-08-28	3.75576e+06	0.85
2022-08-29	1.4193e+07	0		0	0.4	0	0	2.12895e+08	0	2.125		0	2022-08-29	0.635757		1	0	0	0.446367	0.000309536	0.000309536	1	0.371371	0.942507	360700	0.011778	0		1.00023	0.789163	0.000309536	0.000234506	0.00030859	00:00:00	240022	2022-08-29			3.34869e+08	2022-08-29	3.79706e+06	0.85
2022-08-30	1.4193e+07	0		0	0.4	0	0	2.12895e+08	0	2.125		0	2022-08-30	0.635747		1	0	0	0.446367	0.000309031	0.000309031	1	0.371459	0.942507	361000	0.011778	0		1.00024	0.789351	0.000309031	0.000233972	0.000308083	00:00:00	240022	2022-08-30			3.34874e+08	2022-08-30	3.83915e+06	0.85
2022-08-31	1.4193e+07	0		0	0.4	0	0	2.12895e+08	0	2.125		0	2022-08-31	0.635736		1	0	0	0.446367	0.000308527	0.000308527	1	0.371549	0.942507	361300	0.011778	0		1.00024	0.789542	0.000308527	0.000233438	0.000307578	00:00:00	240022	2022-08-31			3.3488e+08	2022-08-31	3.88201e+06	0.85
2022-09-01	1.4193e+07	0		0	0.4	0	0	2.12895e+08	0	2.17188		0	2022-09-01	0.635726		1	0	0	0.502236	0.000308024	0.000308024	1	0.371649	0.942507	361600	0.011778	0		1.00027	0.807174	0.000308024	0.000232906	0.000307073	00:00:00	240022	2022-09-01			3.34885e+08	2022-09-01	3.93021e+06	0.925
2022-09-02	1.4193e+07	0		0	0.4	0	0	2.12895e+08	0	2.18359		0	2022-09-02	0.635715		1	0	0	0.504907	0.000307522	0.000307522	1	0.371752	0.942507	361900	0.011778	0		1.00028	0.811755	0.000307522	0.000232375	0.00030657	00:00:00	240022	2022-09-02			3.34891e+08	2022-09-02	3.98032e+06	0.925
2022-09-03	1.4193e+07	0		0	0.4	0	0	2.12895e+08	0	2.19824		0	2022-09-03	0.635705		1	0	0	0.508207	0.00030702	0.00030702	1	0.371859	0.942507	362200	0.011778	0		1.00029	0.817436	0.00030702	0.000231846	0.000306067	00:00:00	240022	2022-09-03			3.34896e+08	2022-09-03	4.03261e+06	0.925
2022-09-04	1.4193e+07	0		0	0.4	0	0	2.12895e+08	0	2.21655		0	2022-09-04	0.635694		1	0	0	0.512269	0.00030652	0.00030652	1	0.371971	0.942507	362500	0.011778	0		1.0003	0.824492	0.00030652	0.000231318	0.000305565	00:00:00	240022	2022-09-04			3.34902e+08	2022-09-04	4.08741e+06	0.925
2022-09-05	1.4193e+07	0		0	0.4	0	0	2.12895e+08	0	2.22772		0	2022-09-05	0.635684		1	0	0	0.514715	0.00030602	0.00030602	1	0.372087	0.942507	362800	0.011778	0		1.00031	0.828907	0.00030602	0.000230791	0.000305064	00:00:00	240022	2022-09-05			3.34907e+08	2022-09-05	4.14493e+06	0.925
2022-09-06	1.4193e+07	0		0	0.4	0	0	2.12895e+08	0	2.23875		0	2022-09-06	0.635674		1	0	0	0.517106	0.000305521	0.000305521	1	0.37221	0.942507	363100	0.011778	0		1.00033	0.833286	0.000305521	0.000230265	0.000304564	00:00:00	240022	2022-09-06			3.34913e+08	2022-09-06	4.20555e+06	0.925
2022-09-07	1.4193e+07	0		0	0.4	0	0	2.12895e+08	0	2.24888		0	2022-09-07	0.635663		1	0	0	0.519281	0.000305024	0.000305024	1	0.372339	0.942507	363400	0.011778	0		1.00035	0.837346	0.000305024	0.00022974	0.000304065	00:00:00	240022	2022-09-07			3.34918e+08	2022-09-07	4.2697e+06	0.925
2022-09-08	1.4193e+07	0		0	0.4	0	0	2.12895e+08	0	2.25696		0	2022-09-08	0.635653		1	0	0	0.521002	0.000304527	0.000304527	1	0.372473	0.942507	363700	0.011778	0		1.00036	0.840659	0.000304527	0.000229217	0.000303567	00:00:00	240022	2022-09-08			3.34924e+08	2022-09-08	4.33697e+06	0.925
2022-09-09	1.4193e+07	0		0	0.4	0	0	2.12895e+08	0	2.26428		0	2022-09-09	0.635642		1	0	0	0.522549	0.000304031	0.000304031	1	0.372614	0.942507	364000	0.011778	0		1.00038	0.843701	0.000304031	0.000228695	0.00030307	00:00:00	240022	2022-09-09			3.34929e+08	2022-09-09	4.40754e+06	0.925
2022-09-10	1.4193e+07	0		0	0.4	0	0	2.12895e+08	0	2.27066		0	2022-09-10	0.635632		1	0	0	0.52389	0.000303536	0.000303536	1	0.372761	0.942507	364300	0.011778	0		1.00039	0.846412	0.000303536	0.000228175	0.000302573	00:00:00	240022	2022-09-10			3.34935e+08	2022-09-10	4.4816e+06	0.925
2022-09-11	1.4193e+07	0		0	0.4	0	0	2.12895e+08	0	2.2761		0	2022-09-11	0.635621		1	0	0	0.525029	0.000303041	0.000303041	1	0.372915	0.942507	364600	0.011778	0		1.00041	0.848791	0.000303041	0.000227655	0.000302078	00:00:00	240022	2022-09-11			3.3494e+08	2022-09-11	4.55929e+06	0.925
2022-09-12	1.4193e+07	0		0	0.4	0	0	2.12895e+08	0	2.28088		0	2022-09-12	0.635611		1	0	0	0.526025	0.000302548	0.000302548	1	0.373075	0.942507	364900	0.011778	0		1.00043	0.850941	0.000302548	0.000227137	0.000301583	00:00:00	240022	2022-09-12			3.34946e+08	2022-09-12	4.64072e+06	0.925
2022-09-13	1.4193e+07	0		0	0.4	0	0	2.12895e+08	0	2.28503		0	2022-09-13	0.6356		1	0	0	0.526886	0.000302055	0.000302055	1	0.373243	0.942507	365200	0.011778	0		1.00045	0.852873	0.000302055	0.00022662	0.000301089	00:00:00	240022	2022-09-13			3.34951e+08	2022-09-13	4.72597e+06	0.925
2022-09-14	1.4193e+07	0		0	0.4	0	0	2.12895e+08	0	2.28863		0	2022-09-14	0.63559		1	0	0	0.527629	0.000301564	0.000301564	1	0.373417	0.942507	365500	0.011778	0		1.00047	0.854613	0.000301564	0.000226104	0.000300597	00:00:00	240022	2022-09-14			3.34957e+08	2022-09-14	4.81502e+06	0.925
2022-09-15	1.4193e+07	0		0	0.4	0	0	2.12895e+08	0	2.29176		0	2022-09-15	0.635579		1	0	0	0.528275	0.000301073	0.000301073	1	0.373599	0.942507	365800	0.011778	0		1.00049	0.856199	0.000301073	0.00022559	0.000300105	00:00:00	240022	2022-09-15			3.34962e+08	2022-09-15	4.90795e+06	0.925
2022-09-16	1.4193e+07	0		0	0.4	0	0	2.12895e+08	0	2.29448		0	2022-09-16	0.635569		1	0	0	0.528834	0.000300583	0.000300583	1	0.373787	0.942507	366100	0.011778	0		1.0005	0.857648	0.000300583	0.000225076	0.000299613	00:00:00	240022	2022-09-16			3.34968e+08	2022-09-16	5.00479e+06	0.925
2022-09-17	1.4193e+07	0		0	0.4	0	0	2.12895e+08	0	2.29684		0	2022-09-17	0.635559		1	0	0	0.529319	0.000300094	0.000300094	1	0.373983	0.942507	366400	0.011778	0		1.00052	0.85898	0.000300094	0.000224564	0.000299123	00:00:00	240022	2022-09-17			3.34974e+08	2022-09-17	5.10555e+06	0.925
2022-09-18	1.4193e+07	0		0	0.4	0	0	2.12895e+08	0	2.2989		0	2022-09-18	0.635548		1	0	0	0.529739	0.000299606	0.000299606	1	0.374186	0.942507	366700	0.011778	0		1.00054	0.860214	0.000299606	0.000224053	0.000298634	00:00:00	240022	2022-09-18			3.34979e+08	2022-09-18	5.2102e+06	0.925
2022-09-19	1.4193e+07	0		0	0.4	0	0	2.12895e+08	0	2.30068		0	2022-09-19	0.635538		1	0	0	0.530104	0.000299119	0.000299119	1	0.374395	0.942507	367000	0.011778	0		1.00056	0.861364	0.000299119	0.000223544	0.000298145	00:00:00	240022	2022-09-19			3.34985e+08	2022-09-19	5.3187e+06	0.925
2022-09-20	1.4193e+07	0		0	0.4	0	0	2.12895e+08	0	2.30223		0	2022-09-20	0.635527		1	0	0	0.53042	0.000298632	0.000298632	1	0.374612	0.942507	367300	0.011778	0		1.00058	0.862442	0.000298632	0.000223035	0.000297658	00:00:00	240022	2022-09-20			3.3499e+08	2022-09-20	5.43095e+06	0.925
2022-09-21	1.4193e+07	0		0	0.4	0	0	2.12895e+08	0	2.30358		0	2022-09-21	0.635517		1	0	0	0.530695	0.000298147	0.000298147	1	0.374835	0.942507	367600	0.011778	0		1.0006	0.86346	0.000298147	0.000222528	0.000297171	00:00:00	240022	2022-09-21			3.34996e+08	2022-09-21	5.54687e+06	0.925
2022-09-22	1.4193e+07	0		0	0.4	0	0	2.12895e+08	0	2.30475		0	2022-09-22	0.635506		1	0	0	0.530933	0.000297662	0.000297662	1	0.375064	0.942507	367900	0.011778	0		1.00061	0.864428	0.000297662	0.000222022	0.000296685	00:00:00	240022	2022-09-22			3.35001e+08	2022-09-22	5.66633e+06	0.925
2022-09-23	1.4193e+07	0		0	0.4	0	0	2.12895e+08	0	2.30576		0	2022-09-23	0.635496		1	0	0	0.53114	0.000297179	0.000297179	1	0.375299	0.942507	368200	0.011778	0		1.00063	0.865352	0.000297179	0.000221518	0.0002962	00:00:00	240022	2022-09-23			3.35007e+08	2022-09-23	5.78916e+06	0.925
2022-09-24	1.4193e+07	0		0	0.4	0	0	2.12895e+08	0	2.30665		0	2022-09-24	0.635485		1	0	0	0.531319	0.000296696	0.000296696	1	0.37554	0.942507	368500	0.011778	0		1.00064	0.866239	0.000296696	0.000221014	0.000295716	00:00:00	240022	2022-09-24			3.35012e+08	2022-09-24	5.91518e+06	0.925
2022-09-25	1.4193e+07	0		0	0.4	0	0	2.12895e+08	0	2.30741		0	2022-09-25	0.635475		1	0	0	0.531475	0.000296214	0.000296214	1	0.375787	0.942507	368800	0.011778	0		1.00066	0.867095	0.000296214	0.000220512	0.000295233	00:00:00	240022	2022-09-25			3.35018e+08	2022-09-25	6.04416e+06	0.925
2022-09-26	1.4193e+07	0		0	0.4	0	0	2.12895e+08	0	2.30808		0	2022-09-26	0.635465		1	0	0	0.53161	0.000295732	0.000295732	1	0.376038	0.942507	369100	0.011778	0		1.00067	0.867925	0.000295732	0.000220011	0.000294751	00:00:00	240022	2022-09-26			3.35023e+08	2022-09-26	6.17586e+06	0.925
2022-09-27	1.4193e+07	0		0	0.4	0	0	2.12895e+08	0	2.30866		0	2022-09-27	0.635454		1	0	0	0.531728	0.000295252	0.000295252	1	0.376293	0.942507	369400	0.011778	0		1.00068	0.868733	0.000295252	0.000219511	0.000294269	00:00:00	240022	2022-09-27			3.35029e+08	2022-09-27	6.31e+06	0.925
2022-09-28	1.4193e+07	0		0	0.4	0	0	2.12895e+08	0	2.30916		0	2022-09-28	0.635444		1	0	0	0.53183	0.000294773	0.000294773	1	0.376552	0.942507	369700	0.011778	0		1.00069	0.86952	0.000294773	0.000219012	0.000293789	00:00:00	240022	2022-09-28			3.35034e+08	2022-09-28	6.44629e+06	0.925
2022-09-29	1.4193e+07	0		0	0.4	0	0	2.12895e+08	0	2.3096		0	2022-09-29	0.635433		1	0	0	0.531919	0.000294294	0.000294294	1	0.376814	0.942507	370000	0.011778	0		1.0007	0.87029	0.000294294	0.000218514	0.000293309	00:00:00	240022	2022-09-29			3.3504e+08	2022-09-29	6.58439e+06	0.925
2022-09-30	1.4193e+07	0		0	0.4	0	0	2.12895e+08	0	2.30998		0	2022-09-30	0.635423		1	0	0	0.531996	0.000293816	0.000293816	1	0.377079	0.942507	370300	0.011778	0		1.0007	0.871044	0.000293816	0.000218018	0.00029283	00:00:00	240022	2022-09-30			3.35045e+08	2022-09-30	6.72398e+06	0.925
2022-10-01	1.4193e+07	0		0	0.4	0	0	2.12895e+08	0	2.35719		0	2022-10-01	0.635412		1	0	0	0.575765	0.000293339	0.000293339	1	0.37737	0.942507	370600	0.011778	0		1.00077	0.889531	0.000293339	0.000217523	0.000292352	00:00:00	240022	2022-10-01			3.35051e+08	2022-10-01	6.87827e+06	1
2022-10-02	1.4193e+07	0		0	0.4	0	0	2.12895e+08	0	2.36919		0	2022-10-02	0.635402		1	0	0	0.577915	0.000292863	0.000292863	1	0.377667	0.942507	370900	0.011778	0		1.00079	0.894767	0.000292863	0.000217029	0.000291875	00:00:00	240022	2022-10-02			3.35056e+08	2022-10-02	7.03637e+06	1
2022-10-03	1.4193e+07	0		0	0.4	0	0	2.12895e+08	0	2.38409		0	2022-10-03	0.635391		1	0	0	0.580553	0.000292388	0.000292388	1	0.377972	0.942507	371200	0.011778	0		1.00081	0.90112	0.000292388	0.000216536	0.000291398	00:00:00	240022	2022-10-03			3.35062e+08	2022-10-03	7.19851e+06	1
2022-10-04	1.4193e+07	0		0	0.4	0	0	2.12895e+08	0	2.40262		0	2022-10-04	0.635381		1	0	0	0.583787	0.000291914	0.000291914	1	0.378285	0.942507	371500	0.011778	0		1.00083	0.908873	0.000291914	0.000216044	0.000290923	00:00:00	240022	2022-10-04			3.35067e+08	2022-10-04	7.36503e+06	1
2022-10-05	1.4193e+07	0		0	0.4	0	0	2.12895e+08	0	2.41397		0	2022-10-05	0.635371		1	0	0	0.585745	0.00029144	0.00029144	1	0.378605	0.942507	371800	0.011778	0		1.00085	0.913942	0.00029144	0.000215554	0.000290448	00:00:00	240022	2022-10-05			3.35073e+08	2022-10-05	7.53587e+06	1
2022-10-06	1.4193e+07	0		0	0.4	0	0	2.12895e+08	0	2.42517		0	2022-10-06	0.63536		1	0	0	0.587658	0.000290967	0.000290967	1	0.378933	0.942507	372100	0.011778	0		1.00087	0.918977	0.000290967	0.000215064	0.000289974	00:00:00	240022	2022-10-06			3.35078e+08	2022-10-06	7.71132e+06	1
2022-10-07	1.4193e+07	0		0	0.4	0	0	2.12895e+08	0	2.43544		0	2022-10-07	0.63535		1	0	0	0.589397	0.000290495	0.000290495	1	0.379269	0.942507	372400	0.011778	0		1.00089	0.923688	0.000290495	0.000214576	0.000289501	00:00:00	240022	2022-10-07			3.35084e+08	2022-10-07	7.89173e+06	1
2022-10-08	1.4193e+07	0		0	0.4	0	0	2.12895e+08	0	2.44365		0	2022-10-08	0.635339		1	0	0	0.590776	0.000290024	0.000290024	1	0.379611	0.942507	372700	0.011778	0		1.0009	0.927635	0.000290024	0.000214089	0.000289029	00:00:00	240022	2022-10-08			3.35089e+08	2022-10-08	8.07503e+06	1
2022-10-09	1.4193e+07	0		0	0.4	0	0	2.12895e+08	0	2.45106		0	2022-10-09	0.635329		1	0	0	0.592014	0.000289554	0.000289554	1	0.379957	0.942507	373000	0.011778	0		1.00091	0.931298	0.000289554	0.000213603	0.000288558	00:00:00	240022	2022-10-09			3.35095e+08	2022-10-09	8.26086e+06	1
2022-10-10	1.4193e+07	0		0	0.4	0	0	2.12895e+08	0	2.45754		0	2022-10-10	0.635318		1	0	0	0.593089	0.000289085	0.000289085	1	0.380306	0.942507	373300	0.011778	0		1.00092	0.934616	0.000289085	0.000213119	0.000288087	00:00:00	240022	2022-10-10			3.351e+08	2022-10-10	8.44876e+06	1
2022-10-11	1.4193e+07	0		0	0.4	0	0	2.12895e+08	0	2.46306		0	2022-10-11	0.635308		1	0	0	0.594001	0.000288616	0.000288616	1	0.380657	0.942507	373600	0.011778	0		1.00092	0.937582	0.000288616	0.000212635	0.000287618	00:00:00	240022	2022-10-11			3.35106e+08	2022-10-11	8.63814e+06	1
2022-10-12	1.4193e+07	0		0	0.4	0	0	2.12895e+08	0	2.46792		0	2022-10-12	0.635297		1	0	0	0.5948	0.000288149	0.000288149	1	0.38101	0.942507	373900	0.011778	0		1.00093	0.9403	0.000288149	0.000212153	0.000287149	00:00:00	240022	2022-10-12			3.35111e+08	2022-10-12	8.82835e+06	1
2022-10-13	1.4193e+07	0		0	0.4	0	0	2.12895e+08	0	2.47213		0	2022-10-13	0.635287		1	0	0	0.59549	0.000287682	0.000287682	1	0.381362	0.942507	374200	0.011778	0		1.00092	0.942775	0.000287682	0.000211672	0.000286681	00:00:00	240022	2022-10-13			3.35117e+08	2022-10-13	9.01861e+06	1
2022-10-14	1.4193e+07	0		0	0.4	0	0	2.12895e+08	0	2.47578		0	2022-10-14	0.635277		1	0	0	0.596086	0.000287216	0.000287216	1	0.381712	0.942507	374500	0.011778	0		1.00092	0.945033	0.000287216	0.000211191	0.000286214	00:00:00	240022	2022-10-14			3.35122e+08	2022-10-14	9.20798e+06	1
2022-10-15	1.4193e+07	0		0	0.4	0	0	2.12895e+08	0	2.47896		0	2022-10-15	0.635266		1	0	0	0.596604	0.000286751	0.000286751	1	0.382059	0.942507	374800	0.011778	0		1.00091	0.947107	0.000286751	0.000210713	0.000285748	00:00:00	240022	2022-10-15			3.35128e+08	2022-10-15	9.39579e+06	1
2022-10-16	1.4193e+07	0		0	0.4	0	0	2.12895e+08	0	2.48172		0	2022-10-16	0.635256		1	0	0	0.597053	0.000286286	0.000286286	1	0.382401	0.942507	375100	0.011778	0		1.0009	0.949011	0.000286286	0.000210235	0.000285282	00:00:00	240022	2022-10-16			3.35133e+08	2022-10-16	9.58132e+06	1
2022-10-17	1.4193e+07	0		0	0.4	0	0	2.12895e+08	0	2.48411		0	2022-10-17	0.635245		1	0	0	0.597442	0.000285823	0.000285823	1	0.382738	0.942507	375400	0.011778	0		1.00088	0.950764	0.000285823	0.000209758	0.000284818	00:00:00	240022	2022-10-17			3.35139e+08	2022-10-17	9.76388e+06	1
2022-10-18	1.4193e+07	0		0	0.4	0	0	2.12895e+08	0	2.4862		0	2022-10-18	0.635235		1	0	0	0.597779	0.00028536	0.00028536	1	0.383068	0.942507	375700	0.011778	0		1.00086	0.952382	0.00028536	0.000209282	0.000284354	00:00:00	240022	2022-10-18			3.35144e+08	2022-10-18	9.94279e+06	1
2022-10-19	1.4193e+07	0		0	0.4	0	0	2.12895e+08	0	2.48801		0	2022-10-19	0.635224		1	0	0	0.598072	0.000284898	0.000284898	1	0.38339	0.942507	376000	0.011778	0		1.00084	0.953876	0.000284898	0.000208808	0.000283891	00:00:00	240022	2022-10-19			3.3515e+08	2022-10-19	1.01174e+07	1
2022-10-20	1.4193e+07	0		0	0.4	0	0	2.12895e+08	0	2.48958		0	2022-10-20	0.635214		1	0	0	0.598326	0.000284437	0.000284437	1	0.383703	0.942507	376300	0.011778	0		1.00082	0.955258	0.000284437	0.000208335	0.000283429	00:00:00	240022	2022-10-20			3.35155e+08	2022-10-20	1.02872e+07	1
2022-10-21	1.4193e+07	0		0	0.4	0	0	2.12895e+08	0	2.49094		0	2022-10-21	0.635203		1	0	0	0.598546	0.000283977	0.000283977	1	0.384006	0.942507	376600	0.011778	0		1.00079	0.956537	0.000283977	0.000207863	0.000282968	00:00:00	240022	2022-10-21			3.35161e+08	2022-10-21	1.04516e+07	1
2022-10-22	1.4193e+07	0		0	0.4	0	0	2.12895e+08	0	2.49213		0	2022-10-22	0.635193		1	0	0	0.598737	0.000283517	0.000283517	1	0.384298	0.942507	376900	0.011778	0		1.00076	0.957722	0.000283517	0.000207392	0.000282507	00:00:00	240022	2022-10-22			3.35166e+08	2022-10-22	1.06103e+07	1
2022-10-23	1.4193e+07	0		0	0.4	0	0	2.12895e+08	0	2.49316		0	2022-10-23	0.635183		1	0	0	0.598903	0.000283058	0.000283058	1	0.38458	0.942507	377200	0.011778	0		1.00073	0.95882	0.000283058	0.000206922	0.000282047	00:00:00	240022	2022-10-23			3.35172e+08	2022-10-23	1.07629e+07	1
2022-10-24	1.4193e+07	0		0	0.4	0	0	2.12895e+08	0	2.49406		0	2022-10-24	0.635172		1	0	0	0.599047	0.000282601	0.000282601	1	0.384849	0.942507	377500	0.011778	0		1.0007	0.959837	0.000282601	0.000206453	0.000281589	00:00:00	240022	2022-10-24			3.35177e+08	2022-10-24	1.09091e+07	1
2022-10-25	1.4193e+07	0		0	0.4	0	0	2.12895e+08	0	2.49484		0	2022-10-25	0.635162		1	0	0	0.599173	0.000282143	0.000282143	1	0.385107	0.942507	377800	0.011778	0		1.00067	0.96078	0.000282143	0.000205985	0.000281131	00:00:00	240022	2022-10-25			3.35183e+08	2022-10-25	1.10487e+07	1
2022-10-26	1.4193e+07	0		0	0.4	0	0	2.12895e+08	0	2.49552		0	2022-10-26	0.635151		1	0	0	0.599281	0.000281687	0.000281687	1	0.385353	0.942507	378100	0.011778	0		1.00064	0.961654	0.000281687	0.000205519	0.000280673	00:00:00	240022	2022-10-26			3.35188e+08	2022-10-26	1.11816e+07	1
2022-10-27	1.4193e+07	0		0	0.4	0	0	2.12895e+08	0	2.4961		0	2022-10-27	0.635141		1	0	0	0.599376	0.000281232	0.000281232	1	0.385586	0.942507	378400	0.011778	0		1.00061	0.962464	0.000281232	0.000205053	0.000280217	00:00:00	240022	2022-10-27			3.35194e+08	2022-10-27	1.13078e+07	1
2022-10-28	1.4193e+07	0		0	0.4	0	0	2.12895e+08	0	2.49661		0	2022-10-28	0.63513		1	0	0	0.599458	0.000280777	0.000280777	1	0.385808	0.942507	378700	0.011778	0		1.00057	0.963213	0.000280777	0.000204589	0.000279761	00:00:00	240022	2022-10-28			3.35199e+08	2022-10-28	1.14271e+07	1
2022-10-29	1.4193e+07	0		0	0.4	0	0	2.12895e+08	0	2.49706		0	2022-10-29	0.63512		1	0	0	0.599529	0.000280323	0.000280323	1	0.386017	0.942507	379000	0.011778	0		1.00054	0.963907	0.000280323	0.000204125	0.000279306	00:00:00	240022	2022-10-29			3.35205e+08	2022-10-29	1.15397e+07	1
2022-10-30	1.4193e+07	0		0	0.4	0	0	2.12895e+08	0	2.49744		0	2022-10-30	0.63511		1	0	0	0.599591	0.00027987	0.00027987	1	0.386214	0.942507	379300	0.011778	0		1.00051	0.964549	0.00027987	0.000203663	0.000278852	00:00:00	240022	2022-10-30			3.3521e+08	2022-10-30	1.16457e+07	1
2022-10-31	1.4193e+07	0		0	0.4	0	0	2.12895e+08	0	2.49778		0	2022-10-31	0.635099		1	0	0	0.599644	0.000279418	0.000279418	1	0.3864	0.942507	379600	0.011778	0		1.00048	0.965142	0.000279418	0.000203202	0.000278399	00:00:00	240022	2022-10-31			3.35216e+08	2022-10-31	1.17452e+07	1
2022-11-01	1.4193e+07	0		0	0.4	0	0	2.12895e+08	0	2.49807		0	2022-11-01	0.635089		1	0	0	0.599691	0.000278967	0.000278967	1	0.386586	0.942507	379900	0.011778	0		1.00048	0.965718	0.000278967	0.000202742	0.000277947	00:00:00	240022	2022-11-01			3.35221e+08	2022-11-01	1.18446e+07	1
2022-11-02	1.4193e+07	0		0	0.4	0	0	2.12895e+08	0	2.49832		0	2022-11-02	0.635078		1	0	0	0.599732	0.000278516	0.000278516	1	0.386764	0.942507	380200	0.011778	0		1.00046	0.966261	0.000278516	0.000202283	0.000277495	00:00:00	240022	2022-11-02			3.35227e+08	2022-11-02	1.194e+07	1
2022-11-03	1.4193e+07	0		0	0.4	0	0	2.12895e+08	0	2.49854		0	2022-11-03	0.635068		1	0	0	0.599767	0.000278066	0.000278066	1	0.386936	0.942507	380500	0.011778	0		1.00044	0.966775	0.000278066	0.000201825	0.000277045	00:00:00	240022	2022-11-03			3.35232e+08	2022-11-03	1.20318e+07	1
2022-11-04	1.4193e+07	0		0	0.4	0	0	2.12895e+08	0	2.49873		0	2022-11-04	0.635057		1	0	0	0.599797	0.000277617	0.000277617	1	0.387103	0.942507	380800	0.011778	0		1.00043	0.967266	0.000277617	0.000201369	0.000276595	00:00:00	240022	2022-11-04			3.35238e+08	2022-11-04	1.21208e+07	1
2022-11-05	1.4193e+07	0		0	0.4	0	0	2.12895e+08	0	2.4989		0	2022-11-05	0.635047		1	0	0	0.599824	0.000277169	0.000277169	1	0.387264	0.942507	381100	0.011778	0		1.00042	0.967734	0.000277169	0.000200913	0.000276145	00:00:00	240022	2022-11-05			3.35243e+08	2022-11-05	1.22069e+07	1
2022-11-06	1.4193e+07	0		0	0.4	0	0	2.12895e+08	0	2.49904		0	2022-11-06	0.635036		1	0	0	0.599847	0.000276721	0.000276721	1	0.387421	0.942507	381400	0.011778	0		1.00041	0.968183	0.000276721	0.000200459	0.000275697	00:00:00	240022	2022-11-06			3.35249e+08	2022-11-06	1.22905e+07	1
2022-11-07	1.4193e+07	0		0	0.4	0	0	2.12895e+08	0	2.49917		0	2022-11-07	0.635026		1	0	0	0.599867	0.000276275	0.000276275	1	0.387575	0.942507	381700	0.011778	0		1.0004	0.968615	0.000276275	0.000200005	0.000275249	00:00:00	240022	2022-11-07			3.35254e+08	2022-11-07	1.2372e+07	1
2022-11-08	1.4193e+07	0		0	0.4	0	0	2.12895e+08	0	2.49928		0	2022-11-08	0.635016		1	0	0	0.599885	0.000275829	0.000275829	1	0.387723	0.942507	382000	0.011778	0		1.00038	0.969029	0.000275829	0.000199553	0.000274803	00:00:00	240022	2022-11-08			3.3526e+08	2022-11-08	1.2451e+07	1
2022-11-09	1.4193e+07	0		0	0.4	0	0	2.12895e+08	0	2.49937		0	2022-11-09	0.635005		1	0	0	0.5999	0.000275384	0.000275384	1	0.387868	0.942507	382300	0.011778	0		1.00037	0.969427	0.000275384	0.000199101	0.000274357	00:00:00	240022	2022-11-09			3.35265e+08	2022-11-09	1.25276e+07	1
2022-11-10	1.4193e+07	0		0	0.4	0	0	2.12895e+08	0	2.49946		0	2022-11-10	0.634995		1	0	0	0.599913	0.000274939	0.000274939	1	0.388008	0.942507	382600	0.011778	0		1.00036	0.969809	0.000274939	0.000198651	0.000273911	00:00:00	240022	2022-11-10			3.35271e+08	2022-11-10	1.26018e+07	1
2022-11-11	1.4193e+07	0		0	0.4	0	0	2.12895e+08	0	2.49953		0	2022-11-11	0.634984		1	0	0	0.599924	0.000274496	0.000274496	1	0.388144	0.942507	382900	0.011778	0		1.00035	0.970178	0.000274496	0.000198202	0.000273467	00:00:00	240022	2022-11-11			3.35276e+08	2022-11-11	1.26738e+07	1
2022-11-12	1.4193e+07	0		0	0.4	0	0	2.12895e+08	0	2.49959		0	2022-11-12	0.634974		1	0	0	0.599934	0.000274053	0.000274053	1	0.388277	0.942507	383200	0.011778	0		1.00034	0.970532	0.000274053	0.000197754	0.000273023	00:00:00	240022	2022-11-12			3.35282e+08	2022-11-12	1.27435e+07	1
2022-11-13	1.4193e+07	0		0	0.4	0	0	2.12895e+08	0	2.49964		0	2022-11-13	0.634963		1	0	0	0.599943	0.000273611	0.000273611	1	0.388405	0.942507	383500	0.011778	0		1.00033	0.970874	0.000273611	0.000197306	0.00027258	00:00:00	240022	2022-11-13			3.35288e+08	2022-11-13	1.28109e+07	1
2022-11-14	1.4193e+07	0		0	0.4	0	0	2.12895e+08	0	2.49969		0	2022-11-14	0.634953		1	0	0	0.59995	0.00027317	0.00027317	1	0.388529	0.942507	383800	0.011778	0		1.00032	0.971202	0.00027317	0.00019686	0.000272138	00:00:00	240022	2022-11-14			3.35293e+08	2022-11-14	1.28761e+07	1
2022-11-15	1.4193e+07	0		0	0.4	0	0	2.12895e+08	0	2.49973		0	2022-11-15	0.634942		1	0	0	0.599957	0.000272729	0.000272729	1	0.388649	0.942507	384100	0.011778	0		1.00031	0.971518	0.000272729	0.000196415	0.000271697	00:00:00	240022	2022-11-15			3.35299e+08	2022-11-15	1.2939e+07	1
2022-11-16	1.4193e+07	0		0	0.4	0	0	2.12895e+08	0	2.49977		0	2022-11-16	0.634932		1	0	0	0.599963	0.00027229	0.00027229	1	0.388765	0.942507	384400	0.011778	0		1.0003	0.971822	0.00027229	0.000195972	0.000271256	00:00:00	240022	2022-11-16			3.35304e+08	2022-11-16	1.29997e+07	1
2022-11-17	1.4193e+07	0		0	0.4	0	0	2.12895e+08	0	2.4998		0	2022-11-17	0.634922		1	0	0	0.599967	0.000271851	0.000271851	1	0.388878	0.942507	384700	0.011778	0		1.00029	0.972115	0.000271851	0.000195529	0.000270817	00:00:00	240022	2022-11-17			3.3531e+08	2022-11-17	1.30581e+07	1
2022-11-18	1.4193e+07	0		0	0.4	0	0	2.12895e+08	0	2.49982		0	2022-11-18	0.634911		1	0	0	0.599972	0.000271413	0.000271413	1	0.388986	0.942507	385000	0.011778	0		1.00028	0.972396	0.000271413	0.000195087	0.000270378	00:00:00	240022	2022-11-18			3.35315e+08	2022-11-18	1.31143e+07	1
2022-11-19	1.4193e+07	0		0	0.4	0	0	2.12895e+08	0	2.49985		0	2022-11-19	0.634901		1	0	0	0.599975	0.000270975	0.000270975	1	0.38909	0.942507	385300	0.011778	0		1.00027	0.972666	0.000270975	0.000194646	0.000269939	00:00:00	240022	2022-11-19			3.35321e+08	2022-11-19	1.31683e+07	1
2022-11-20	1.4193e+07	0		0	0.4	0	0	2.12895e+08	0	2.49987		0	2022-11-20	0.63489		1	0	0	0.599979	0.000270539	0.000270539	1	0.389191	0.942507	385600	0.011778	0		1.00026	0.972925	0.000270539	0.000194206	0.000269502	00:00:00	240022	2022-11-20			3.35326e+08	2022-11-20	1.32201e+07	1
2022-11-21	1.4193e+07	0		0	0.4	0	0	2.12895e+08	0	2.49988		0	2022-11-21	0.63488		1	0	0	0.599981	0.000270103	0.000270103	1	0.389287	0.942507	385900	0.011778	0		1.00025	0.973173	0.000270103	0.000193767	0.000269065	00:00:00	240022	2022-11-21			3.35332e+08	2022-11-21	1.32698e+07	1
2022-11-22	1.4193e+07	0		0	0.4	0	0	2.12895e+08	0	2.4999		0	2022-11-22	0.634869		1	0	0	0.599984	0.000269668	0.000269668	1	0.38938	0.942507	386200	0.011778	0		1.00024	0.973412	0.000269668	0.00019333	0.000268629	00:00:00	240022	2022-11-22			3.35337e+08	2022-11-22	1.33174e+07	1
2022-11-23	1.4193e+07	0		0	0.4	0	0	2.12895e+08	0	2.49991		0	2022-11-23	0.634859		1	0	0	0.599986	0.000269234	0.000269234	1	0.38947	0.942507	386500	0.011778	0		1.00023	0.97364	0.000269234	0.000192893	0.000268194	00:00:00	240022	2022-11-23			3.35343e+08	2022-11-23	1.33629e+07	1
2022-11-24	1.4193e+07	0		0	0.4	0	0	2.12895e+08	0	2.49992		0	2022-11-24	0.634849		1	0	0	0.599988	0.0002688	0.0002688	1	0.389555	0.942507	386800	0.011778	0		1.00022	0.973859	0.0002688	0.000192457	0.00026776	00:00:00	240022	2022-11-24			3.35348e+08	2022-11-24	1.34064e+07	1
2022-11-25	1.4193e+07	0		0	0.4	0	0	2.12895e+08	0	2.49993		0	2022-11-25	0.634838		1	0	0	0.599989	0.000268367	0.000268367	1	0.389638	0.942507	387100	0.011778	0		1.00021	0.974068	0.000268367	0.000192023	0.000267326	00:00:00	240022	2022-11-25			3.35354e+08	2022-11-25	1.34478e+07	1
2022-11-26	1.4193e+07	0		0	0.4	0	0	2.12895e+08	0	2.49994		0	2022-11-26	0.634828		1	0	0	0.599991	0.000267935	0.000267935	1	0.389716	0.942507	387400	0.011778	0		1.0002	0.974269	0.000267935	0.000191589	0.000266893	00:00:00	240022	2022-11-26			3.35359e+08	2022-11-26	1.34874e+07	1
2022-11-27	1.4193e+07	0		0	0.4	0	0	2.12895e+08	0	2.49995		0	2022-11-27	0.634817		1	0	0	0.599992	0.000267504	0.000267504	1	0.389792	0.942507	387700	0.011778	0		1.00019	0.974461	0.000267504	0.000191157	0.000266461	00:00:00	240022	2022-11-27			3.35365e+08	2022-11-27	1.3525e+07	1
2022-11-28	1.4193e+07	0		0	0.4	0	0	2.12895e+08	0	2.49996		0	2022-11-28	0.634807		1	0	0	0.599993	0.000267074	0.000267074	1	0.389864	0.942507	388000	0.011778	0		1.00019	0.974644	0.000267074	0.000190725	0.00026603	00:00:00	240022	2022-11-28			3.3537e+08	2022-11-28	1.35608e+07	1
2022-11-29	1.4193e+07	0		0	0.4	0	0	2.12895e+08	0	2.49996		0	2022-11-29	0.634796		1	0	0	0.599994	0.000266644	0.000266644	1	0.389933	0.942507	388300	0.011778	0		1.00018	0.974819	0.000266644	0.000190295	0.0002656	00:00:00	240022	2022-11-29			3.35376e+08	2022-11-29	1.35949e+07	1
2022-11-30	1.4193e+07	0		0	0.4	0	0	2.12895e+08	0	2.49997		0	2022-11-30	0.634786		1	0	0	0.599995	0.000266215	0.000266215	1	0.39	0.942507	388600	0.011778	0		1.00017	0.974986	0.000266215	0.000189865	0.00026517	00:00:00	240022	2022-11-30			3.35381e+08	2022-11-30	1.36272e+07	1
2022-12-01	1.4193e+07	0		0	0.4	0	0	2.12895e+08	0	2.49997		0	2022-12-01	0.634776		1	0	0	0.599995	0.000265787	0.000265787	1	0.390063	0.942507	388900	0.011778	0		1.00016	0.975146	0.000265787	0.000189437	0.000264741	00:00:00	240022	2022-12-01			3.35387e+08	2022-12-01	1.36579e+07	1
2022-12-02	1.4193e+07	0		0	0.4	0	0	2.12895e+08	0	2.49998		0	2022-12-02	0.634765		1	0	0	0.599996	0.000265359	0.000265359	1	0.390123	0.942507	389200	0.011778	0		1.00015	0.975298	0.000265359	0.000189009	0.000264312	00:00:00	240022	2022-12-02			3.35392e+08	2022-12-02	1.36869e+07	1
2022-12-03	1.4193e+07	0		0	0.4	0	0	2.12895e+08	0	2.49998		0	2022-12-03	0.634755		1	0	0	0.599997	0.000264932	0.000264932	1	0.390181	0.942507	389500	0.011778	0		1.00015	0.975444	0.000264932	0.000188583	0.000263885	00:00:00	240022	2022-12-03			3.35398e+08	2022-12-03	1.37145e+07	1
2022-12-04	1.4193e+07	0		0	0.4	0	0	2.12895e+08	0	2.49998		0	2022-12-04	0.634744		1	0	0	0.599997	0.000264506	0.000264506	1	0.390236	0.942507	389800	0.011778	0		1.00014	0.975583	0.000264506	0.000188157	0.000263458	00:00:00	240022	2022-12-04			3.35403e+08	2022-12-04	1.37405e+07	1
2022-12-05	1.4193e+07	0		0	0.4	0	0	2.12895e+08	0	2.49998		0	2022-12-05	0.634734		1	0	0	0.599997	0.000264081	0.000264081	1	0.390289	0.942507	390100	0.011778	0		1.00013	0.975716	0.000264081	0.000187733	0.000263032	00:00:00	240022	2022-12-05			3.35409e+08	2022-12-05	1.37652e+07	1
2022-12-06	1.4193e+07	0		0	0.4	0	0	2.12895e+08	0	2.49999		0	2022-12-06	0.634723		1	0	0	0.599998	0.000263657	0.000263657	1	0.390339	0.942507	390400	0.011778	0		1.00013	0.975842	0.000263657	0.000187309	0.000262607	00:00:00	240022	2022-12-06			3.35414e+08	2022-12-06	1.37885e+07	1
2022-12-07	1.4193e+07	0		0	0.4	0	0	2.12895e+08	0	2.49999		0	2022-12-07	0.634713		1	0	0	0.599998	0.000263233	0.000263233	1	0.390387	0.942507	390700	0.011778	0		1.00012	0.975963	0.000263233	0.000186887	0.000262182	00:00:00	240022	2022-12-07			3.3542e+08	2022-12-07	1.38105e+07	1
2022-12-08	1.4193e+07	0		0	0.4	0	0	2.12895e+08	0	2.49999		0	2022-12-08	0.634702		1	0	0	0.599998	0.00026281	0.00026281	1	0.390433	0.942507	391000	0.011778	0		1.00012	0.976078	0.00026281	0.000186465	0.000261758	00:00:00	240022	2022-12-08			3.35425e+08	2022-12-08	1.38313e+07	1
2022-12-09	1.4193e+07	0		0	0.4	0	0	2.12895e+08	0	2.49999		0	2022-12-09	0.634692		1	0	0	0.599999	0.000262387	0.000262387	1	0.390477	0.942507	391300	0.011778	0		1.00011	0.976188	0.000262387	0.000186045	0.000261335	00:00:00	240022	2022-12-09			3.35431e+08	2022-12-09	1.38509e+07	1
2022-12-10	1.4193e+07	0		0	0.4	0	0	2.12895e+08	0	2.49999		0	2022-12-10	0.634682		1	0	0	0.599999	0.000261966	0.000261966	1	0.390519	0.942507	391600	0.011778	0		1.00011	0.976294	0.000261966	0.000185625	0.000260913	00:00:00	240022	2022-12-10			3.35436e+08	2022-12-10	1.38693e+07	1
2022-12-11	1.4193e+07	0		0	0.4	0	0	2.12895e+08	0	2.49999		0	2022-12-11	0.634671		1	0	0	0.599999	0.000261545	0.000261545	1	0.390559	0.942507	391900	0.011778	0		1.0001	0.976394	0.000261545	0.000185207	0.000260491	00:00:00	240022	2022-12-11			3.35442e+08	2022-12-11	1.38867e+07	1
2022-12-12	1.4193e+07	0			0.4	0	0	2.12895e+08	0	2.49999		0	2022-12-12	0.634661		1	0	0	0.599999	0	0	1	0.390597	0.942507	392200	0.011778	0		1.0001	0.97649	0.000261545	0.000185207	0.000260491	00:00:00	240022	2022-12-12			3.35447e+08	2022-12-12	1.39031e+07	1
2022-12-13	1.4193e+07	0			0.4	0	0	2.12895e+08	0	2.49999		0	2022-12-13	0.63465		1	0	0	0.599999	0	0	1	0.390633	0.942507	392500	0.011778	0		1.00009	0.976582	0.000261545	0.000185207	0.000260491	00:00:00	240022	2022-12-13			3.35453e+08	2022-12-13	1.39186e+07	1
2022-12-14	1.4193e+07	0			0.4	0	0	2.12895e+08	0	2.5		0	2022-12-14	0.63464		1	0	0	0.599999	0	0	1	0.390668	0.942507	392800	0.011778	0		1.00009	0.976669	0.000261545	0.000185207	0.000260491	00:00:00	240022	2022-12-14			3.35458e+08	2022-12-14	1.39331e+07	1
2022-12-15	1.4193e+07	0			0.4	0	0	2.12895e+08	0	2.5		0	2022-12-15	0.634629		1	0	0	0.599999	0	0	1	0.390702	0.942507	393100	0.011778	0		1.00009	0.976753	0.000261545	0.000185207	0.000260491	00:00:00	240022	2022-12-15			3.35464e+08	2022-12-15	1.39468e+07	1
2022-12-16	1.4193e+07	0			0.4	0	0	2.12895e+08	0	2.5		0	2022-12-16	0.634619		1	0	0	0.599999	0	0	1	0.390734	0.942507	393400	0.011778	0		1.00008	0.976833	0.000261545	0.000185207	0.000260491	00:00:00	240022	2022-12-16			3.35469e+08	2022-12-16	1.39596e+07	1
2022-12-17	1.4193e+07	0			0.4	0	0	2.12895e+08	0	2.5		0	2022-12-17	0.634609		1	0	0	0.6	0	0	1	0.390765	0.942507	393700	0.011778	0		1.00008	0.97691	0.000261545	0.000185207	0.000260491	00:00:00	240022	2022-12-17			3.35475e+08	2022-12-17	1.39717e+07	1
2022-12-18	1.4193e+07	0			0.4	0	0	2.12895e+08	0	2.5		0	2022-12-18	0.634598		1	0	0	0.6	0	0	1	0.390794	0.942507	394000	0.011778	0		1.00008	0.976984	0.000261545	0.000185207	0.000260491	00:00:00	240022	2022-12-18			3.3548e+08	2022-12-18	1.3983e+07	1
2022-12-19	1.4193e+07	0			0.4	0	0	2.12895e+08	0	2.5		0	2022-12-19	0.634588		1	0	0	0.6	0	0	1	0.390822	0.942507	394300	0.011778	0		1.00007	0.977054	0.000261545	0.000185207	0.000260491	00:00:00	240022	2022-12-19			3.35486e+08	2022-12-19	1.39937e+07	1
2022-12-20	1.4193e+07	0			0.4	0	0	2.12895e+08	0	2.5		0	2022-12-20	0.634577		1	0	0	0.6	0	0	1	0.390849	0.942507	394600	0.011778	0		1.00007	0.977122	0.000261545	0.000185207	0.000260491	00:00:00	240022	2022-12-20			3.35492e+08	2022-12-20	1.40037e+07	1
2022-12-21	1.4193e+07	0			0.4	0	0	2.12895e+08	0	2.5		0	2022-12-21	0.634567		1	0	0	0.6	0	0	1	0.390875	0.942507	394900	0.011778	0		1.00007	0.977187	0.000261545	0.000185207	0.000260491	00:00:00	240022	2022-12-21			3.35497e+08	2022-12-21	1.40131e+07	1
2022-12-22	1.4193e+07	0			0.4	0	0	2.12895e+08	0	2.5		0	2022-12-22	0.634556		1	0	0	0.6	0	0	1	0.3909	0.942507	395200	0.011778	0		1.00006	0.97725	0.000261545	0.000185207	0.000260491	00:00:00	240022	2022-12-22			3.35503e+08	2022-12-22	1.40219e+07	1
2022-12-23	1.4193e+07	0			0.4	0	0	2.12895e+08	0	2.5		0	2022-12-23	0.634546		1	0	0	0.6	0	0	1	0.390924	0.942507	395500	0.011778	0		1.00006	0.97731	0.000261545	0.000185207	0.000260491	00:00:00	240022	2022-12-23			3.35508e+08	2022-12-23	1.40302e+07	1
2022-12-24	1.4193e+07	0			0.4	0	0	2.12895e+08	0	2.5		0	2022-12-24	0.634536		1	0	0	0.6	0	0	1	0.390947	0.942507	395800	0.011778	0		1.00006	0.977368	0.000261545	0.000185207	0.000260491	00:00:00	240022	2022-12-24			3.35514e+08	2022-12-24	1.40379e+07	1
2022-12-25	1.4193e+07	0			0.4	0	0	2.12895e+08	0	2.5		0	2022-12-25	0.634525		1	0	0	0.6	0	0	1	0.39097	0.942507	396100	0.011778	0		1.00006	0.977424	0.000261545	0.000185207	0.000260491	00:00:00	240022	2022-12-25			3.35519e+08	2022-12-25	1.40452e+07	1
2022-12-26	1.4193e+07	0			0.4	0	0	2.12895e+08	0	2.5		0	2022-12-26	0.634515		1	0	0	0.6	0	0	1	0.390991	0.942507	396400	0.011778	0		1.00005	0.977477	0.000261545	0.000185207	0.000260491	00:00:00	240022	2022-12-26			3.35525e+08	2022-12-26	1.4052e+07	1
2022-12-27	1.4193e+07	0			0.4	0	0	2.12895e+08	0	2.5		0	2022-12-27	0.634504		1	0	0	0.6	0	0	1	0.391012	0.942507	396700	0.011778	0		1.00005	0.977529	0.000261545	0.000185207	0.000260491	00:00:00	240022	2022-12-27			3.3553e+08	2022-12-27	1.40584e+07	1
2022-12-28	1.4193e+07	0			0.4	0	0	2.12895e+08	0	2.5		0	2022-12-28	0.634494		1	0	0	0.6	0	0	1	0.391032	0.942507	397000	0.011778	0		1.00005	0.977579	0.000261545	0.000185207	0.000260491	00:00:00	240022	2022-12-28			3.35536e+08	2022-12-28	1.40644e+07	1
2022-12-29	1.4193e+07	0			0.4	0	0	2.12895e+08	0	2.5		0	2022-12-29	0.634483		1	0	0	0.6	0	0	1	0.391051	0.942507	397300	0.011778	0		1.00005	0.977628	0.000261545	0.000185207	0.000260491	00:00:00	240022	2022-12-29			3.35541e+08	2022-12-29	1.407e+07	1
2022-12-30	1.4193e+07	0			0.4	0	0	2.12895e+08	0	2.5		0	2022-12-30	0.634473		1	0	0	0.6	0	0	1	0.39107	0.942507	397600	0.011778	0		1.00005	0.977675	0.000261545	0.000185207	0.000260491	00:00:00	240022	2022-12-30			3.35547e+08	2022-12-30	1.40753e+07	1
2022-12-31	1.4193e+07	0			0.4	0	0	2.12895e+08	0	2.5		0	2022-12-31	0.634463		1	0	0	0.6	0	0	1	0.391088	0.942507	397900	0.011778	0		1.00005	0.97772	0.000261545	0.000185207	0.000260491	00:00:00	240022	2022-12-31			3.35552e+08	2022-12-31	1.40802e+07	1
2023-01-01	1.4193e+07	0			0.4	0	0	2.12895e+08	0	2.5		0	2023-01-01	0.634452		1	0	0	0.6	0	0	1	0.391106	0.942507	398200	0.011778	0		1.00005	0.977765	0.000261545	0.000185207	0.000260491	00:00:00	240022	2023-01-01			3.35558e+08	2023-01-01	1.40849e+07	1
2023-01-02	1.4193e+07	0			0.4	0	0	2.12895e+08	0	2.5		0	2023-01-02	0.634442		1	0	0	0.6	0	0	1	0.391123	0.942507	398500	0.011778	0		1.00004	0.977807	0.000261545	0.000185207	0.000260491	00:00:00	240022	2023-01-02			3.35563e+08	2023-01-02	1.40892e+07	1
2023-01-03	1.4193e+07	0			0.4	0	0	2.12895e+08	0	2.5		0	2023-01-03	0.634431		1	0	0	0.6	0	0	1	0.39114	0.942507	398800	0.011778	0		1.00004	0.977849	0.000261545	0.000185207	0.000260491	00:00:00	240022	2023-01-03			3.35569e+08	2023-01-03	1.40932e+07	1
2023-01-04	1.4193e+07	0			0.4	0	0	2.12895e+08	0	2.5		0	2023-01-04	0.634421		1	0	0	0.6	0	0	1	0.391156	0.942507	399100	0.011778	0		1.00004	0.97789	0.000261545	0.000185207	0.000260491	00:00:00	240022	2023-01-04			3.35574e+08	2023-01-04	1.4097e+07	1
2023-01-05	1.4193e+07	0			0.4	0	0	2.12895e+08	0	2.5		0	2023-01-05	0.63441		1	0	0	0.6	0	0	1	0.391172	0.942507	399400	0.011778	0		1.00004	0.977929	0.000261545	0.000185207	0.000260491	00:00:00	240022	2023-01-05			3.3558e+08	2023-01-05	1.41006e+07	1
2023-01-06	1.4193e+07	0			0.4	0	0	2.12895e+08	0	2.5		0	2023-01-06	0.6344		1	0	0	0.6	0	0	1	0.391187	0.942507	399700	0.011778	0		1.00004	0.977968	0.000261545	0.000185207	0.000260491	00:00:00	240022	2023-01-06			3.35585e+08	2023-01-06	1.41039e+07	1
2023-01-07	1.4193e+07	0			0.4	0	0	2.12895e+08	0	2.5		0	2023-01-07	0.63439		1	0	0	0.6	0	0	1	0.391202	0.942507	400000	0.011778	0		1.00004	0.978005	0.000261545	0.000185207	0.000260491	00:00:00	240022	2023-01-07			3.35591e+08	2023-01-07	1.4107e+07	1
2023-01-08	1.4193e+07	0			0.4	0	0	2.12895e+08	0	2.5		0	2023-01-08	0.634379		1	0	0	0.6	0	0	1	0.391217	0.942507	400300	0.011778	0		1.00004	0.978042	0.000261545	0.000185207	0.000260491	00:00:00	240022	2023-01-08			3.35596e+08	2023-01-08	1.41099e+07	1
2023-01-09	1.4193e+07	0			0.4	0	0	2.12895e+08	0	2.5		0	2023-01-09	0.634369		1	0	0	0.6	0	0	1	0.391231	0.942507	400600	0.011778	0		1.00004	0.978078	0.000261545	0.000185207	0.000260491	00:00:00	240022	2023-01-09			3.35602e+08	2023-01-09	1.41126e+07	1
2023-01-10	1.4193e+07	0			0.4	0	0	2.12895e+08	0	2.5		0	2023-01-10	0.634358		1	0	0	0.6	0	0	1	0.391245	0.942507	400900	0.011778	0		1.00004	0.978113	0.000261545	0.000185207	0.000260491	00:00:00	240022	2023-01-10			3.35607e+08	2023-01-10	1.41152e+07	1
2023-01-11	1.4193e+07	0			0.4	0	0	2.12895e+08	0	2.5		0	2023-01-11	0.634348		1	0	0	0.6	0	0	1	0.391259	0.942507	401200	0.011778	0		1.00004	0.978147	0.000261545	0.000185207	0.000260491	00:00:00	240022	2023-01-11			3.35613e+08	2023-01-11	1.41176e+07	1
2023-01-12	1.4193e+07	0			0.4	0	0	2.12895e+08	0	2.5		0	2023-01-12	0.634337		1	0	0	0.6	0	0	1	0.391272	0.942507	401500	0.011778	0		1.00003	0.978181	0.000261545	0.000185207	0.000260491	00:00:00	240022	2023-01-12			3.35618e+08	2023-01-12	1.41198e+07	1
2023-01-13	1.4193e+07	0			0.4	0	0	2.12895e+08	0	2.5		0	2023-01-13	0.634327		1	0	0	0.6	0	0	1	0.391286	0.942507	401800	0.011778	0		1.00003	0.978214	0.000261545	0.000185207	0.000260491	00:00:00	240022	2023-01-13			3.35624e+08	2023-01-13	1.41219e+07	1
2023-01-14	1.4193e+07	0			0.4	0	0	2.12895e+08	0	2.5		0	2023-01-14	0.634317		1	0	0	0.6	0	0	1	0.391299	0.942507	402100	0.011778	0		1.00003	0.978246	0.000261545	0.000185207	0.000260491	00:00:00	240022	2023-01-14			3.35629e+08	2023-01-14	1.41238e+07	1
2023-01-15	1.4193e+07	0			0.4	0	0	2.12895e+08	0	2.5		0	2023-01-15	0.634306		1	0	0	0.6	0	0	1	0.391311	0.942507	402400	0.011778	0		1.00003	0.978278	0.000261545	0.000185207	0.000260491	00:00:00	240022	2023-01-15			3.35635e+08	2023-01-15	1.41257e+07	1
2023-01-16	1.4193e+07	0			0.4	0	0	2.12895e+08	0	2.5		0	2023-01-16	0.634296		1	0	0	0.6	0	0	1	0.391324	0.942507	402700	0.011778	0		1.00003	0.97831	0.000261545	0.000185207	0.000260491	00:00:00	240022	2023-01-16			3.3564e+08	2023-01-16	1.41274e+07	1
2023-01-17	1.4193e+07	0			0.4	0	0	2.12895e+08	0	2.5		0	2023-01-17	0.634285		1	0	0	0.6	0	0	1	0.391336	0.942507	403000	0.011778	0		1.00003	0.978341	0.000261545	0.000185207	0.000260491	00:00:00	240022	2023-01-17			3.35646e+08	2023-01-17	1.4129e+07	1
2023-01-18	1.4193e+07	0			0.4	0	0	2.12895e+08	0	2.5		0	2023-01-18	0.634275		1	0	0	0.6	0	0	1	0.391349	0.942507	403300	0.011778	0		1.00003	0.978371	0.000261545	0.000185207	0.000260491	00:00:00	240022	2023-01-18			3.35651e+08	2023-01-18	1.41305e+07	1
2023-01-19	1.4193e+07	0			0.4	0	0	2.12895e+08	0	2.5		0	2023-01-19	0.634264		1	0	0	0.6	0	0	1	0.391361	0.942507	403600	0.011778	0		1.00003	0.978401	0.000261545	0.000185207	0.000260491	00:00:00	240022	2023-01-19			3.35657e+08	2023-01-19	1.41319e+07	1
2023-01-20	1.4193e+07	0			0.4	0	0	2.12895e+08	0	2.5		0	2023-01-20	0.634254		1	0	0	0.6	0	0	1	0.391372	0.942507	403900	0.011778	0		1.00003	0.978431	0.000261545	0.000185207	0.000260491	00:00:00	240022	2023-01-20			3.35663e+08	2023-01-20	1.41332e+07	1
2023-01-21	1.4193e+07	0			0.4	0	0	2.12895e+08	0	2.5		0	2023-01-21	0.634244		1	0	0	0.6	0	0	1	0.391384	0.942507	404200	0.011778	0		1.00003	0.97846	0.000261545	0.000185207	0.000260491	00:00:00	240022	2023-01-21			3.35668e+08	2023-01-21	1.41344e+07	1
2023-01-22	1.4193e+07	0			0.4	0	0	2.12895e+08	0	2.5		0	2023-01-22	0.634233		1	0	0	0.6	0	0	1	0.391396	0.942507	404500	0.011778	0		1.00003	0.978489	0.000261545	0.000185207	0.000260491	00:00:00	240022	2023-01-22			3.35674e+08	2023-01-22	1.41356e+07	1
2023-01-23	1.4193e+07	0			0.4	0	0	2.12895e+08	0	2.5		0	2023-01-23	0.634223		1	0	0	0.6	0	0	1	0.391407	0.942507	404800	0.011778	0		1.00003	0.978518	0.000261545	0.000185207	0.000260491	00:00:00	240022	2023-01-23			3.35679e+08	2023-01-23	1.41366e+07	1
2023-01-24	1.4193e+07	0			0.4	0	0	2.12895e+08	0	2.5		0	2023-01-24	0.634212		1	0	0	0.6	0	0	1	0.391419	0.942507	405100	0.011778	0		1.00003	0.978546	0.000261545	0.000185207	0.000260491	00:00:00	240022	2023-01-24			3.35685e+08	2023-01-24	1.41376e+07	1
2023-01-25	1.4193e+07	0			0.4	0	0	2.12895e+08	0	2.5		0	2023-01-25	0.634202		1	0	0	0.6	0	0	1	0.39143	0.942507	405400	0.011778	0		1.00003	0.978575	0.000261545	0.000185207	0.000260491	00:00:00	240022	2023-01-25			3.3569e+08	2023-01-25	1.41386e+07	1
2023-01-26	1.4193e+07	0			0.4	0	0	2.12895e+08	0	2.5		0	2023-01-26	0.634191		1	0	0	0.6	0	0	1	0.391441	0.942507	405700	0.011778	0		1.00003	0.978602	0.000261545	0.000185207	0.000260491	00:00:00	240022	2023-01-26			3.35696e+08	2023-01-26	1.41394e+07	1
2023-01-27	1.4193e+07	0			0.4	0	0	2.12895e+08	0	2.5		0	2023-01-27	0.634181		1	0	0	0.6	0	0	1	0.391452	0.942507	406000	0.011778	0		1.00003	0.97863	0.000261545	0.000185207	0.000260491	00:00:00	240022	2023-01-27			3.35701e+08	2023-01-27	1.41403e+07	1
2023-01-28	1.4193e+07	0			0.4	0	0	2.12895e+08	0	2.5		0	2023-01-28	0.634171		1	0	0	0.6	0	0	1	0.391463	0.942507	406300	0.011778	0		1.00003	0.978657	0.000261545	0.000185207	0.000260491	00:00:00	240022	2023-01-28			3.35707e+08	2023-01-28	1.4141e+07	1
2023-01-29	1.4193e+07	0			0.4	0	0	2.12895e+08	0	2.5		0	2023-01-29	0.63416		1	0	0	0.6	0	0	1	0.391474	0.942507	406600	0.011778	0		1.00003	0.978684	0.000261545	0.000185207	0.000260491	00:00:00	240022	2023-01-29			3.35712e+08	2023-01-29	1.41417e+07	1
2023-01-30	1.4193e+07	0			0.4	0	0	2.12895e+08	0	2.5		0	2023-01-30	0.63415		1	0	0	0.6	0	0	1	0.391485	0.942507	406900	0.011778	0		1.00003	0.978711	0.000261545	0.000185207	0.000260491	00:00:00	240022	2023-01-30			3.35718e+08	2023-01-30	1.41424e+07	1
2023-01-31	1.4193e+07	0			0.4	0	0	2.12895e+08	0	2.5		0	2023-01-31	0.634139		1	0	0	0.6	0	0	1	0.391495	0.942507	407200	0.011778	0		1.00003	0.978738	0.000261545	0.000185207	0.000260491	00:00:00	240022	2023-01-31			3.35723e+08	2023-01-31	1.4143e+07	1
2023-02-01	1.4193e+07	0			0.4	0	0	2.12895e+08	0	2.5		0	2023-02-01	0.634129		1	0	0	0.6	0	0	1	0.391506	0.942507	407500	0.011778	0		1.00003	0.978765	0.000261545	0.000185207	0.000260491	00:00:00	240022	2023-02-01			3.35729e+08	2023-02-01	1.41436e+07	1
2023-02-02	1.4193e+07	0			0.4	0	0	2.12895e+08	0	2.5		0	2023-02-02	0.634118		1	0	0	0.6	0	0	1	0.391516	0.942507	407800	0.011778	0		1.00003	0.978791	0.000261545	0.000185207	0.000260491	00:00:00	240022	2023-02-02			3.35734e+08	2023-02-02	1.41442e+07	1
2023-02-03	1.4193e+07	0			0.4	0	0	2.12895e+08	0	2.5		0	2023-02-03	0.634108		1	0	0	0.6	0	0	1	0.391527	0.942507	408100	0.011778	0		1.00003	0.978817	0.000261545	0.000185207	0.000260491	00:00:00	240022	2023-02-03			3.3574e+08	2023-02-03	1.41448e+07	1
2023-02-04	1.4193e+07	0			0.4	0	0	2.12895e+08	0	2.5		0	2023-02-04	0.634098		1	0	0	0.6	0	0	1	0.391538	0.942507	408400	0.011778	0		1.00003	0.978844	0.000261545	0.000185207	0.000260491	00:00:00	240022	2023-02-04			3.35745e+08	2023-02-04	1.41453e+07	1
2023-02-05	1.4193e+07	0			0.4	0	0	2.12895e+08	0	2.5		0	2023-02-05	0.634087		1	0	0	0.6	0	0	1	0.391548	0.942507	408700	0.011778	0		1.00003	0.97887	0.000261545	0.000185207	0.000260491	00:00:00	240022	2023-02-05			3.35751e+08	2023-02-05	1.41458e+07	1
2023-02-06	1.4193e+07	0			0.4	0	0	2.12895e+08	0	2.5		0	2023-02-06	0.634077		1	0	0	0.6	0	0	1	0.391558	0.942507	409000	0.011778	0		1.00003	0.978896	0.000261545	0.000185207	0.000260491	00:00:00	240022	2023-02-06			3.35756e+08	2023-02-06	1.41463e+07	1
2023-02-07	1.4193e+07	0			0.4	0	0	2.12895e+08	0	2.5		0	2023-02-07	0.634066		1	0	0	0.6	0	0	1	0.391569	0.942507	409300	0.011778	0		1.00003	0.978922	0.000261545	0.000185207	0.000260491	00:00:00	240022	2023-02-07			3.35762e+08	2023-02-07	1.41467e+07	1
2023-02-08	1.4193e+07	0			0.4	0	0	2.12895e+08	0	2.5		0	2023-02-08	0.634056		1	0	0	0.6	0	0	1	0.391579	0.942507	409600	0.011778	0		1.00003	0.978948	0.000261545	0.000185207	0.000260491	00:00:00	240022	2023-02-08			3.35767e+08	2023-02-08	1.41472e+07	1
2023-02-09	1.4193e+07	0			0.4	0	0	2.12895e+08	0	2.5		0	2023-02-09	0.634046		1	0	0	0.6	0	0	1	0.39159	0.942507	409900	0.011778	0		1.00003	0.978974	0.000261545	0.000185207	0.000260491	00:00:00	240022	2023-02-09			3.35773e+08	2023-02-09	1.41476e+07	1
2023-02-10	1.4193e+07	0			0.4	0	0	2.12895e+08	0	2.5		0	2023-02-10	0.634035		1	0	0	0.6	0	0	1	0.3916	0.942507	410200	0.011778	0		1.00003	0.979	0.000261545	0.000185207	0.000260491	00:00:00	240022	2023-02-10			3.35778e+08	2023-02-10	1.4148e+07	1
2023-02-11	1.4193e+07	0			0.4	0	0	2.12895e+08	0	2.5		0	2023-02-11	0.634025		1	0	0	0.6	0	0	1	0.39161	0.942507	410500	0.011778	0		1.00003	0.979025	0.000261545	0.000185207	0.000260491	00:00:00	240022	2023-02-11			3.35784e+08	2023-02-11	1.41484e+07	1
2023-02-12	1.4193e+07	0			0.4	0	0	2.12895e+08	0	2.5		0	2023-02-12	0.634014		1	0	0	0.6	0	0	1	0.39162	0.942507	410800	0.011778	0		1.00003	0.979051	0.000261545	0.000185207	0.000260491	00:00:00	240022	2023-02-12			3.35789e+08	2023-02-12	1.41488e+07	1
2023-02-13	1.4193e+07	0			0.4	0	0	2.12895e+08	0	2.5		0	2023-02-13	0.634004		1	0	0	0.6	0	0	1	0.391631	0.942507	411100	0.011778	0		1.00003	0.979077	0.000261545	0.000185207	0.000260491	00:00:00	240022	2023-02-13			3.35795e+08	2023-02-13	1.41492e+07	1
2023-02-14	1.4193e+07	0			0.4	0	0	2.12895e+08	0	2.5		0	2023-02-14	0.633993		1	0	0	0.6	0	0	1	0.391641	0.942507	411400	0.011778	0		1.00003	0.979102	0.000261545	0.000185207	0.000260491	00:00:00	240022	2023-02-14			3.358e+08	2023-02-14	1.41495e+07	1
2023-02-15	1.4193e+07	0			0.4	0	0	2.12895e+08	0	2.5		0	2023-02-15	0.633983		1	0	0	0.6	0	0	1	0.391651	0.942507	411700	0.011778	0		1.00003	0.979128	0.000261545	0.000185207	0.000260491	00:00:00	240022	2023-02-15			3.35806e+08	2023-02-15	1.41499e+07	1
2023-02-16	1.4193e+07	0			0.4	0	0	2.12895e+08	0	2.5		0	2023-02-16	0.633973		1	0	0	0.6	0	0	1	0.391661	0.942507	412000	0.011778	0		1.00003	0.979153	0.000261545	0.000185207	0.000260491	00:00:00	240022	2023-02-16			3.35812e+08	2023-02-16	1.41502e+07	1
2023-02-17	1.4193e+07	0			0.4	0	0	2.12895e+08	0	2.5		0	2023-02-17	0.633962		1	0	0	0.6	0	0	1	0.391671	0.942507	412300	0.011778	0		1.00003	0.979178	0.000261545	0.000185207	0.000260491	00:00:00	240022	2023-02-17			3.35817e+08	2023-02-17	1.41505e+07	1
2023-02-18	1.4193e+07	0			0.4	0	0	2.12895e+08	0	2.5		0	2023-02-18	0.633952		1	0	0	0.6	0	0	1	0.391682	0.942507	412600	0.011778	0		1.00003	0.979204	0.000261545	0.000185207	0.000260491	00:00:00	240022	2023-02-18			3.35823e+08	2023-02-18	1.41509e+07	1
2023-02-19	1.4193e+07	0			0.4	0	0	2.12895e+08	0	2.5		0	2023-02-19	0.633941		1	0	0	0.6	0	0	1	0.391692	0.942507	412900	0.011778	0		1.00003	0.979229	0.000261545	0.000185207	0.000260491	00:00:00	240022	2023-02-19			3.35828e+08	2023-02-19	1.41512e+07	1
2023-02-20	1.4193e+07	0			0.4	0	0	2.12895e+08	0	2.5		0	2023-02-20	0.633931		1	0	0	0.6	0	0	1	0.391702	0.942507	413200	0.011778	0		1.00003	0.979254	0.000261545	0.000185207	0.000260491	00:00:00	240022	2023-02-20			3.35834e+08	2023-02-20	1.41515e+07	1
2023-02-21	1.4193e+07	0			0.4	0	0	2.12895e+08	0	2.5		0	2023-02-21	0.63392		1	0	0	0.6	0	0	1	0.391712	0.942507	413500	0.011778	0		1.00003	0.97928	0.000261545	0.000185207	0.000260491	00:00:00	240022	2023-02-21			3.35839e+08	2023-02-21	1.41517e+07	1
2023-02-22	1.4193e+07	0			0.4	0	0	2.12895e+08	0	2.5		0	2023-02-22	0.63391		1	0	0	0.6	0	0	1	0.391722	0.942507	413800	0.011778	0		1.00003	0.979305	0.000261545	0.000185207	0.000260491	00:00:00	240022	2023-02-22			3.35845e+08	2023-02-22	1.4152e+07	1
2023-02-23	1.4193e+07	0			0.4	0	0	2.12895e+08	0	2.5		0	2023-02-23	0.6339		1	0	0	0.6	0	0	1	0.391732	0.942507	414100	0.011778	0		1.00003	0.97933	0.000261545	0.000185207	0.000260491	00:00:00	240022	2023-02-23			3.3585e+08	2023-02-23	1.41523e+07	1
2023-02-24	1.4193e+07	0			0.4	0	0	2.12895e+08	0	2.5		0	2023-02-24	0.633889		1	0	0	0.6	0	0	1	0.391742	0.942507	414400	0.011778	0		1.00003	0.979355	0.000261545	0.000185207	0.000260491	00:00:00	240022	2023-02-24			3.35856e+08	2023-02-24	1.41526e+07	1
2023-02-25	1.4193e+07	0			0.4	0	0	2.12895e+08	0	2.5		0	2023-02-25	0.633879		1	0	0	0.6	0	0	1	0.391752	0.942507	414700	0.011778	0		1.00003	0.97938	0.000261545	0.000185207	0.000260491	00:00:00	240022	2023-02-25			3.35861e+08	2023-02-25	1.41528e+07	1
2023-02-26	1.4193e+07	0			0.4	0	0	2.12895e+08	0	2.5		0	2023-02-26	0.633868		1	0	0	0.6	0	0	1	0.391762	0.942507	415000	0.011778	0		1.00003	0.979405	0.000261545	0.000185207	0.000260491	00:00:00	240022	2023-02-26			3.35867e+08	2023-02-26	1.4153e+07	1
2023-02-27	1.4193e+07	0			0.4	0	0	2.12895e+08	0	2.5		0	2023-02-27	0.633858		1	0	0	0.6	0	0	1	0.391772	0.942507	415300	0.011778	0		1.00003	0.97943	0.000261545	0.000185207	0.000260491	00:00:00	240022	2023-02-27			3.35872e+08	2023-02-27	1.41533e+07	1
2023-02-28	1.4193e+07	0			0.4	0	0	2.12895e+08	0	2.5		0	2023-02-28	0.633848		1	0	0	0.6	0	0	1	0.391782	0.942507	415600	0.011778	0		1.00003	0.979455	0.000261545	0.000185207	0.000260491	00:00:00	240022	2023-02-28			3.35878e+08	2023-02-28	1.41535e+07	1
2023-03-01	1.4193e+07	0			0.4	0	0	2.12895e+08	0	2.5		0	2023-03-01	0.633837		1	0	0	0.6	0	0	1	0.391792	0.942507	415900	0.011778	0		1.00003	0.97948	0.000261545	0.000185207	0.000260491	00:00:00	240022	2023-03-01			3.35883e+08	2023-03-01	1.41537e+07	1
2023-03-02	1.4193e+07	0			0.4	0	0	2.12895e+08	0	2.5		0	2023-03-02	0.633827		1	0	0	0.6	0	0	1	0.391802	0.942507	416200	0.011778	0		1.00003	0.979505	0.000261545	0.000185207	0.000260491	00:00:00	240022	2023-03-02			3.35889e+08	2023-03-02	1.4154e+07	1
2023-03-03	1.4193e+07	0			0.4	0	0	2.12895e+08	0	2.5		0	2023-03-03	0.633816		1	0	0	0.6	0	0	1	0.391812	0.942507	416500	0.011778	0		1.00003	0.97953	0.000261545	0.000185207	0.000260491	00:00:00	240022	2023-03-03			3.35894e+08	2023-03-03	1.41542e+07	1
2023-03-04	1.4193e+07	0			0.4	0	0	2.12895e+08	0	2.5		0	2023-03-04	0.633806		1	0	0	0.6	0	0	1	0.391822	0.942507	416800	0.011778	0		1.00003	0.979555	0.000261545	0.000185207	0.000260491	00:00:00	240022	2023-03-04			3.359e+08	2023-03-04	1.41544e+07	1
2023-03-05	1.4193e+07	0			0.4	0	0	2.12895e+08	0	2.5		0	2023-03-05	0.633795		1	0	0	0.6	0	0	1	0.391832	0.942507	417100	0.011778	0		1.00003	0.97958	0.000261545	0.000185207	0.000260491	00:00:00	240022	2023-03-05			3.35905e+08	2023-03-05	1.41546e+07	1
2023-03-06	1.4193e+07	0			0.4	0	0	2.12895e+08	0	2.5		0	2023-03-06	0.633785		1	0	0	0.6	0	0	1	0.391842	0.942507	417400	0.011778	0		1.00003	0.979605	0.000261545	0.000185207	0.000260491	00:00:00	240022	2023-03-06			3.35911e+08	2023-03-06	1.41548e+07	1
2023-03-07	1.4193e+07	0			0.4	0	0	2.12895e+08	0	2.5		0	2023-03-07	0.633775		1	0	0	0.6	0	0	1	0.391852	0.942507	417700	0.011778	0		1.00003	0.979629	0.000261545	0.000185207	0.000260491	00:00:00	240022	2023-03-07			3.35916e+08	2023-03-07	1.41549e+07	1
2023-03-08	1.4193e+07	0			0.4	0	0	2.12895e+08	0	2.5		0	2023-03-08	0.633764		1	0	0	0.6	0	0	1	0.391862	0.942507	418000	0.011778	0		1.00003	0.979654	0.000261545	0.000185207	0.000260491	00:00:00	240022	2023-03-08			3.35922e+08	2023-03-08	1.41551e+07	1
2023-03-09	1.4193e+07	0			0.4	0	0	2.12895e+08	0	2.5		0	2023-03-09	0.633754		1	0	0	0.6	0	0	1	0.391872	0.942507	418300	0.011778	0		1.00003	0.979679	0.000261545	0.000185207	0.000260491	00:00:00	240022	2023-03-09			3.35927e+08	2023-03-09	1.41553e+07	1
2023-03-10	1.4193e+07	0			0.4	0	0	2.12895e+08	0	2.5		0	2023-03-10	0.633743		1	0	0	0.6	0	0	1	0.391881	0.942507	418600	0.011778	0		1.00003	0.979704	0.000261545	0.000185207	0.000260491	00:00:00	240022	2023-03-10			3.35933e+08	2023-03-10	1.41555e+07	1
2023-03-11	1.4193e+07	0			0.4	0	0	2.12895e+08	0	2.5		0	2023-03-11	0.633733		1	0	0	0.6	0	0	1	0.391891	0.942507	418900	0.011778	0		1.00003	0.979728	0.000261545	0.000185207	0.000260491	00:00:00	240022	2023-03-11			3.35939e+08	2023-03-11	1.41556e+07	1
2023-03-12	1.4193e+07	0			0.4	0	0	2.12895e+08	0	2.5		0	2023-03-12	0.633723		1	0	0	0.6	0	0	1	0.391901	0.942507	419200	0.011778	0		1.00003	0.979753	0.000261545	0.000185207	0.000260491	00:00:00	240022	2023-03-12			3.35944e+08	2023-03-12	1.41558e+07	1
2023-03-13	1.4193e+07	0			0.4	0	0	2.12895e+08	0	2.5		0	2023-03-13	0.633712		1	0	0	0.6	0	0	1	0.391911	0.942507	419500	0.011778	0		1.00003	0.979778	0.000261545	0.000185207	0.000260491	00:00:00	240022	2023-03-13			3.3595e+08	2023-03-13	1.41559e+07	1
2023-03-14	1.4193e+07	0			0.4	0	0	2.12895e+08	0	2.5		0	2023-03-14	0.633702		1	0	0	0.6	0	0	1	0.391921	0.942507	419800	0.011778	0		1.00003	0.979802	0.000261545	0.000185207	0.000260491	00:00:00	240022	2023-03-14			3.35955e+08	2023-03-14	1.41561e+07	1
2023-03-15	1.4193e+07	0			0.4	0	0	2.12895e+08	0	2.5		0	2023-03-15	0.633691		1	0	0	0.6	0	0	1	0.391931	0.942507	420100	0.011778	0		1.00003	0.979827	0.000261545	0.000185207	0.000260491	00:00:00	240022	2023-03-15			3.35961e+08	2023-03-15	1.41562e+07	1
2023-03-16	1.4193e+07	0			0.4	0	0	2.12895e+08	0	2.5		0	2023-03-16	0.633681		1	0	0	0.6	0	0	1	0.391941	0.942507	420400	0.011778	0		1.00003	0.979851	0.000261545	0.000185207	0.000260491	00:00:00	240022	2023-03-16			3.35966e+08	2023-03-16	1.41564e+07	1
2023-03-17	1.4193e+07	0			0.4	0	0	2.12895e+08	0	2.5		0	2023-03-17	0.63367		1	0	0	0.6	0	0	1	0.39195	0.942507	420700	0.011778	0		1.00003	0.979876	0.000261545	0.000185207	0.000260491	00:00:00	240022	2023-03-17			3.35972e+08	2023-03-17	1.41565e+07	1
2023-03-18	1.4193e+07	0			0.4	0	0	2.12895e+08	0	2.5		0	2023-03-18	0.63366		1	0	0	0.6	0	0	1	0.39196	0.942507	421000	0.011778	0		1.00003	0.9799	0.000261545	0.000185207	0.000260491	00:00:00	240022	2023-03-18			3.35977e+08	2023-03-18	1.41566e+07	1
2023-03-19	1.4193e+07	0			0.4	0	0	2.12895e+08	0	2.5		0	2023-03-19	0.63365		1	0	0	0.6	0	0	1	0.39197	0.942507	421300	0.011778	0		1.00003	0.979925	0.000261545	0.000185207	0.000260491	00:00:00	240022	2023-03-19			3.35983e+08	2023-03-19	1.41568e+07	1
2023-03-20	1.4193e+07	0			0.4	0	0	2.12895e+08	0	2.5		0	2023-03-20	0.633639		1	0	0	0.6	0	0	1	0.39198	0.942507	421600	0.011778	0		1.00003	0.97995	0.000261545	0.000185207	0.000260491	00:00:00	240022	2023-03-20			3.35988e+08	2023-03-20	1.41569e+07	1
2023-03-21	1.4193e+07	0			0.4	0	0	2.12895e+08	0	2.5		0	2023-03-21	0.633629		1	0	0	0.6	0	0	1	0.39199	0.942507	421900	0.011778	0		1.00002	0.979974	0.000261545	0.000185207	0.000260491	00:00:00	240022	2023-03-21			3.35994e+08	2023-03-21	1.4157e+07	1
2023-03-22	1.4193e+07	0			0.4	0	0	2.12895e+08	0	2.5		0	2023-03-22	0.633618		1	0	0	0.6	0	0	1	0.391999	0.942507	422200	0.011778	0		1.00002	0.979998	0.000261545	0.000185207	0.000260491	00:00:00	240022	2023-03-22			3.35999e+08	2023-03-22	1.41571e+07	1
2023-03-23	1.4193e+07	0			0.4	0	0	2.12895e+08	0	2.5		0	2023-03-23	0.633608		1	0	0	0.6	0	0	1	0.392009	0.942507	422500	0.011778	0		1.00002	0.980023	0.000261545	0.000185207	0.000260491	00:00:00	240022	2023-03-23			3.36005e+08	2023-03-23	1.41572e+07	1
2023-03-24	1.4193e+07	0			0.4	0	0	2.12895e+08	0	2.5		0	2023-03-24	0.633598		1	0	0	0.6	0	0	1	0.392019	0.942507	422800	0.011778	0		1.00002	0.980047	0.000261545	0.000185207	0.000260491	00:00:00	240022	2023-03-24			3.3601e+08	2023-03-24	1.41573e+07	1
2023-03-25	1.4193e+07	0			0.4	0	0	2.12895e+08	0	2.5		0	2023-03-25	0.633587		1	0	0	0.6	0	0	1	0.392029	0.942507	423100	0.011778	0		1.00002	0.980072	0.000261545	0.000185207	0.000260491	00:00:00	240022	2023-03-25			3.36016e+08	2023-03-25	1.41575e+07	1
2023-03-26	1.4193e+07	0			0.4	0	0	2.12895e+08	0	2.5		0	2023-03-26	0.633577		1	0	0	0.6	0	0	1	0.392039	0.942507	423400	0.011778	0		1.00002	0.980096	0.000261545	0.000185207	0.000260491	00:00:00	240022	2023-03-26			3.36021e+08	2023-03-26	1.41576e+07	1
2023-03-27	1.4193e+07	0			0.4	0	0	2.12895e+08	0	2.5		0	2023-03-27	0.633566		1	0	0	0.6	0	0	1	0.392048	0.942507	423700	0.011778	0		1.00002	0.980121	0.000261545	0.000185207	0.000260491	00:00:00	240022	2023-03-27			3.36027e+08	2023-03-27	1.41577e+07	1
2023-03-28	1.4193e+07	0			0.4	0	0	2.12895e+08	0	2.5		0	2023-03-28	0.633556		1	0	0	0.6	0	0	1	0.392058	0.942507	424000	0.011778	0		1.00002	0.980145	0.000261545	0.000185207	0.000260491	00:00:00	240022	2023-03-28			3.36032e+08	2023-03-28	1.41578e+07	1
2023-03-29	1.4193e+07	0			0.4	0	0	2.12895e+08	0	2.5		0	2023-03-29	0.633545		1	0	0	0.6	0	0	1	0.392068	0.942507	424300	0.011778	0		1.00002	0.980169	0.000261545	0.000185207	0.000260491	00:00:00	240022	2023-03-29			3.36038e+08	2023-03-29	1.41578e+07	1
2023-03-30	1.4193e+07	0			0.4	0	0	2.12895e+08	0	2.5		0	2023-03-30	0.633535		1	0	0	0.6	0	0	1	0.392078	0.942507	424600	0.011778	0		1.00002	0.980194	0.000261545	0.000185207	0.000260491	00:00:00	240022	2023-03-30			3.36043e+08	2023-03-30	1.41579e+07	1
2023-03-31	1.4193e+07	0			0.4	0	0	2.12895e+08	0	2.5		0	2023-03-31	0.633525		1	0	0	0.6	0	0	1	0.392087	0.942507	424900	0.011778	0		1.00002	0.980218	0.000261545	0.000185207	0.000260491	00:00:00	240022	2023-03-31			3.36049e+08	2023-03-31	1.4158e+07	1
2023-04-01	1.4193e+07	0			0.4	0	0	2.12895e+08	0	2.5		0	2023-04-01	0.633514		1	0	0	0.6	0	0	1	0.392097	0.942507	425200	0.011778	0		1.00002	0.980243	0.000261545	0.000185207	0.000260491	00:00:00	240022	2023-04-01			3.36054e+08	2023-04-01	1.41581e+07	1
2023-04-02	1.4193e+07	0			0.4	0	0	2.12895e+08	0	2.5		0	2023-04-02	0.633504		1	0	0	0.6	0	0	1	0.392107	0.942507	425500	0.011778	0		1.00002	0.980267	0.000261545	0.000185207	0.000260491	00:00:00	240022	2023-04-02			3.3606e+08	2023-04-02	1.41582e+07	1
2023-04-03	1.4193e+07	0			0.4	0	0	2.12895e+08	0	2.5		0	2023-04-03	0.633493		1	0	0	0.6	0	0	1	0.392116	0.942507	425800	0.011778	0		1.00002	0.980291	0.000261545	0.000185207	0.000260491	00:00:00	240022	2023-04-03			3.36066e+08	2023-04-03	1.41583e+07	1
2023-04-04	1.4193e+07	0			0.4	0	0	2.12895e+08	0	2.5		0	2023-04-04	0.633483		1	0	0	0.6	0	0	1	0.392126	0.942507	426100	0.011778	0		1.00002	0.980315	0.000261545	0.000185207	0.000260491	00:00:00	240022	2023-04-04			3.36071e+08	2023-04-04	1.41584e+07	1
2023-04-05	1.4193e+07	0			0.4	0	0	2.12895e+08	0	2.5		0	2023-04-05	0.633473		1	0	0	0.6	0	0	1	0.392136	0.942507	426400	0.011778	0		1.00002	0.98034	0.000261545	0.000185207	0.000260491	00:00:00	240022	2023-04-05			3.36077e+08	2023-04-05	1.41584e+07	1
2023-04-06	1.4193e+07	0			0.4	0	0	2.12895e+08	0	2.5		0	2023-04-06	0.633462		1	0	0	0.6	0	0	1	0.392146	0.942507	426700	0.011778	0		1.00002	0.980364	0.000261545	0.000185207	0.000260491	00:00:00	240022	2023-04-06			3.36082e+08	2023-04-06	1.41585e+07	1
2023-04-07	1.4193e+07	0			0.4	0	0	2.12895e+08	0	2.5		0	2023-04-07	0.633452		1	0	0	0.6	0	0	1	0.392155	0.942507	427000	0.011778	0		1.00002	0.980388	0.000261545	0.000185207	0.000260491	00:00:00	240022	2023-04-07			3.36088e+08	2023-04-07	1.41586e+07	1
2023-04-08	1.4193e+07	0			0.4	0	0	2.12895e+08	0	2.5		0	2023-04-08	0.633441		1	0	0	0.6	0	0	1	0.392165	0.942507	427300	0.011778	0		1.00002	0.980413	0.000261545	0.000185207	0.000260491	00:00:00	240022	2023-04-08			3.36093e+08	2023-04-08	1.41586e+07	1
2023-04-09	1.4193e+07	0			0.4	0	0	2.12895e+08	0	2.5		0	2023-04-09	0.633431		1	0	0	0.6	0	0	1	0.392175	0.942507	427600	0.011778	0		1.00002	0.980437	0.000261545	0.000185207	0.000260491	00:00:00	240022	2023-04-09			3.36099e+08	2023-04-09	1.41587e+07	1
2023-04-10	1.4193e+07	0			0.4	0	0	2.12895e+08	0	2.5		0	2023-04-10	0.63342		1	0	0	0.6	0	0	1	0.392184	0.942507	427900	0.011778	0		1.00002	0.980461	0.000261545	0.000185207	0.000260491	00:00:00	240022	2023-04-10			3.36104e+08	2023-04-10	1.41588e+07	1
2023-04-11	1.4193e+07	0			0.4	0	0	2.12895e+08	0	2.5		0	2023-04-11	0.63341		1	0	0	0.6	0	0	1	0.392194	0.942507	428200	0.011778	0		1.00002	0.980485	0.000261545	0.000185207	0.000260491	00:00:00	240022	2023-04-11			3.3611e+08	2023-04-11	1.41588e+07	1
2023-04-12	1.4193e+07	0			0.4	0	0	2.12895e+08	0	2.5		0	2023-04-12	0.6334		1	0	0	0.6	0	0	1	0.392204	0.942507	428500	0.011778	0		1.00002	0.98051	0.000261545	0.000185207	0.000260491	00:00:00	240022	2023-04-12			3.36115e+08	2023-04-12	1.41589e+07	1
2023-04-13	1.4193e+07	0			0.4	0	0	2.12895e+08	0	2.5		0	2023-04-13	0.633389		1	0	0	0.6	0	0	1	0.392214	0.942507	428800	0.011778	0		1.00002	0.980534	0.000261545	0.000185207	0.000260491	00:00:00	240022	2023-04-13			3.36121e+08	2023-04-13	1.4159e+07	1
2023-04-14	1.4193e+07	0			0.4	0	0	2.12895e+08	0	2.5		0	2023-04-14	0.633379		1	0	0	0.6	0	0	1	0.392223	0.942507	429100	0.011778	0		1.00002	0.980558	0.000261545	0.000185207	0.000260491	00:00:00	240022	2023-04-14			3.36126e+08	2023-04-14	1.4159e+07	1
2023-04-15	1.4193e+07	0			0.4	0	0	2.12895e+08	0	2.5		0	2023-04-15	0.633368		1	0	0	0.6	0	0	1	0.392233	0.942507	429400	0.011778	0		1.00002	0.980582	0.000261545	0.000185207	0.000260491	00:00:00	240022	2023-04-15			3.36132e+08	2023-04-15	1.41591e+07	1
2023-04-16	1.4193e+07	0			0.4	0	0	2.12895e+08	0	2.5		0	2023-04-16	0.633358		1	0	0	0.6	0	0	1	0.392243	0.942507	429700	0.011778	0		1.00002	0.980606	0.000261545	0.000185207	0.000260491	00:00:00	240022	2023-04-16			3.36137e+08	2023-04-16	1.41591e+07	1
2023-04-17	1.4193e+07	0			0.4	0	0	2.12895e+08	0	2.5		0	2023-04-17	0.633348		1	0	0	0.6	0	0	1	0.392252	0.942507	430000	0.011778	0		1.00002	0.980631	0.000261545	0.000185207	0.000260491	00:00:00	240022	2023-04-17			3.36143e+08	2023-04-17	1.41592e+07	1
2023-04-18	1.4193e+07	0			0.4	0	0	2.12895e+08	0	2.5		0	2023-04-18	0.633337		1	0	0	0.6	0	0	1	0.392262	0.942507	430300	0.011778	0		1.00002	0.980655	0.000261545	0.000185207	0.000260491	00:00:00	240022	2023-04-18			3.36148e+08	2023-04-18	1.41592e+07	1
2023-04-19	1.4193e+07	0			0.4	0	0	2.12895e+08	0	2.5		0	2023-04-19	0.633327		1	0	0	0.6	0	0	1	0.392272	0.942507	430600	0.011778	0		1.00002	0.980679	0.000261545	0.000185207	0.000260491	00:00:00	240022	2023-04-19			3.36154e+08	2023-04-19	1.41593e+07	1
2023-04-20	1.4193e+07	0			0.4	0	0	2.12895e+08	0	2.5		0	2023-04-20	0.633316		1	0	0	0.6	0	0	1	0.392281	0.942507	430900	0.011778	0		1.00002	0.980703	0.000261545	0.000185207	0.000260491	00:00:00	240022	2023-04-20			3.36159e+08	2023-04-20	1.41593e+07	1
2023-04-21	1.4193e+07	0			0.4	0	0	2.12895e+08	0	2.5		0	2023-04-21	0.633306		1	0	0	0.6	0	0	1	0.392291	0.942507	431200	0.011778	0		1.00002	0.980727	0.000261545	0.000185207	0.000260491	00:00:00	240022	2023-04-21			3.36165e+08	2023-04-21	1.41594e+07	1
2023-04-22	1.4193e+07	0			0.4	0	0	2.12895e+08	0	2.5		0	2023-04-22	0.633296		1	0	0	0.6	0	0	1	0.392301	0.942507	431500	0.011778	0		1.00002	0.980752	0.000261545	0.000185207	0.000260491	00:00:00	240022	2023-04-22			3.36171e+08	2023-04-22	1.41594e+07	1
2023-04-23	1.4193e+07	0			0.4	0	0	2.12895e+08	0	2.5		0	2023-04-23	0.633285		1	0	0	0.6	0	0	1	0.39231	0.942507	431800	0.011778	0		1.00002	0.980776	0.000261545	0.000185207	0.000260491	00:00:00	240022	2023-04-23			3.36176e+08	2023-04-23	1.41595e+07	1
2023-04-24	1.4193e+07	0			0.4	0	0	2.12895e+08	0	2.5		0	2023-04-24	0.633275		1	0	0	0.6	0	0	1	0.39232	0.942507	432100	0.011778	0		1.00002	0.9808	0.000261545	0.000185207	0.000260491	00:00:00	240022	2023-04-24			3.36182e+08	2023-04-24	1.41595e+07	1
2023-04-25	1.4193e+07	0			0.4	0	0	2.12895e+08	0	2.5		0	2023-04-25	0.633264		1	0	0	0.6	0	0	1	0.39233	0.942507	432400	0.011778	0		1.00002	0.980824	0.000261545	0.000185207	0.000260491	00:00:00	240022	2023-04-25			3.36187e+08	2023-04-25	1.41596e+07	1
2023-04-26	1.4193e+07	0			0.4	0	0	2.12895e+08	0	2.5		0	2023-04-26	0.633254		1	0	0	0.6	0	0	1	0.392339	0.942507	432700	0.011778	0		1.00002	0.980848	0.000261545	0.000185207	0.000260491	00:00:00	240022	2023-04-26			3.36193e+08	2023-04-26	1.41596e+07	1
2023-04-27	1.4193e+07	0			0.4	0	0	2.12895e+08	0	2.5		0	2023-04-27	0.633243		1	0	0	0.6	0	0	1	0.392349	0.942507	433000	0.011778	0		1.00002	0.980872	0.000261545	0.000185207	0.000260491	00:00:00	240022	2023-04-27			3.36198e+08	2023-04-27	1.41596e+07	1
2023-04-28	1.4193e+07	0			0.4	0	0	2.12895e+08	0	2.5		0	2023-04-28	0.633233		1	0	0	0.6	0	0	1	0.392359	0.942507	433300	0.011778	0		1.00002	0.980896	0.000261545	0.000185207	0.000260491	00:00:00	240022	2023-04-28			3.36204e+08	2023-04-28	1.41597e+07	1
2023-04-29	1.4193e+07	0			0.4	0	0	2.12895e+08	0	2.5		0	2023-04-29	0.633223		1	0	0	0.6	0	0	1	0.392368	0.942507	433600	0.011778	0		1.00002	0.98092	0.000261545	0.000185207	0.000260491	00:00:00	240022	2023-04-29			3.36209e+08	2023-04-29	1.41597e+07	1
2023-04-30	1.4193e+07	0			0.4	0	0	2.12895e+08	0	2.5		0	2023-04-30	0.633212		1	0	0	0.6	0	0	1	0.392378	0.942507	433900	0.011778	0		1.00002	0.980945	0.000261545	0.000185207	0.000260491	00:00:00	240022	2023-04-30			3.36215e+08	2023-04-30	1.41597e+07	1
2023-05-01	1.4193e+07	0			0.4	0	0	2.12895e+08	0	2.45312		0	2023-05-01	0.633202		1	0	0	0.559305	0	0	1	0.392387	0.942507	434200	0.011778	0		1.00002	0.962576	0.000261545	0.000185207	0.000260491	00:00:00	240022	2023-05-01			3.3622e+08	2023-05-01	1.41598e+07	0.925
2023-05-02	1.4193e+07	0			0.4	0	0	2.12895e+08	0	2.44141		0	2023-05-02	0.633191		1	0	0	0.557189	0	0	1	0.392397	0.942507	434500	0.011778	0		1.00002	0.958001	0.000261545	0.000185207	0.000260491	00:00:00	240022	2023-05-02			3.36226e+08	2023-05-02	1.41598e+07	0.925
2023-05-03	1.4193e+07	0			0.4	0	0	2.12895e+08	0	2.42676		0	2023-05-03	0.633181		1	0	0	0.554516	0	0	1	0.392407	0.942507	434800	0.011778	0		1.00002	0.952276	0.000261545	0.000185207	0.000260491	00:00:00	240022	2023-05-03			3.36231e+08	2023-05-03	1.41598e+07	0.925
2023-05-04	1.4193e+07	0			0.4	0	0	2.12895e+08	0	2.40845		0	2023-05-04	0.633171		1	0	0	0.551129	0	0	1	0.392416	0.942507	435100	0.011778	0		1.00002	0.945114	0.000261545	0.000185207	0.000260491	00:00:00	240022	2023-05-04			3.36237e+08	2023-05-04	1.41599e+07	0.925
2023-05-05	1.4193e+07	0			0.4	0	0	2.12895e+08	0	2.39728		0	2023-05-05	0.63316		1	0	0	0.549038	0	0	1	0.392426	0.942507	435400	0.011778	0		1.00002	0.940754	0.000261545	0.000185207	0.000260491	00:00:00	240022	2023-05-05			3.36242e+08	2023-05-05	1.41599e+07	0.925
2023-05-06	1.4193e+07	0			0.4	0	0	2.12895e+08	0	2.38625		0	2023-05-06	0.63315		1	0	0	0.546953	0	0	1	0.392436	0.942507	435700	0.011778	0		1.00002	0.936448	0.000261545	0.000185207	0.000260491	00:00:00	240022	2023-05-06			3.36248e+08	2023-05-06	1.41599e+07	0.925
2023-05-07	1.4193e+07	0			0.4	0	0	2.12895e+08	0	2.37612		0	2023-05-07	0.633139		1	0	0	0.545022	0	0	1	0.392445	0.942507	436000	0.011778	0		1.00002	0.932496	0.000261545	0.000185207	0.000260491	00:00:00	240022	2023-05-07			3.36253e+08	2023-05-07	1.41599e+07	0.925
2023-05-08	1.4193e+07	0			0.4	0	0	2.12895e+08	0	2.36804		0	2023-05-08	0.633129		1	0	0	0.543469	0	0	1	0.392455	0.942507	436300	0.011778	0		1.00002	0.929347	0.000261545	0.000185207	0.000260491	00:00:00	240022	2023-05-08			3.36259e+08	2023-05-08	1.41599e+07	0.925
2023-05-09	1.4193e+07	0			0.4	0	0	2.12895e+08	0	2.36072		0	2023-05-09	0.633119		1	0	0	0.542055	0	0	1	0.392464	0.942507	436600	0.011778	0		1.00002	0.926501	0.000261545	0.000185207	0.000260491	00:00:00	240022	2023-05-09			3.36264e+08	2023-05-09	1.416e+07	0.925
2023-05-10	1.4193e+07	0			0.4	0	0	2.12895e+08	0	2.35434		0	2023-05-10	0.633108		1	0	0	0.540814	0	0	1	0.392474	0.942507	436900	0.011778	0		1.00002	0.924019	0.000261545	0.000185207	0.000260491	00:00:00	240022	2023-05-10			3.3627e+08	2023-05-10	1.416e+07	0.925
2023-05-11	1.4193e+07	0			0.4	0	0	2.12895e+08	0	2.3489		0	2023-05-11	0.633098		1	0	0	0.53975	0	0	1	0.392484	0.942507	437200	0.011778	0		1.00002	0.921905	0.000261545	0.000185207	0.000260491	00:00:00	240022	2023-05-11			3.36276e+08	2023-05-11	1.416e+07	0.925
2023-05-12	1.4193e+07	0			0.4	0	0	2.12895e+08	0	2.34412		0	2023-05-12	0.633087		1	0	0	0.538811	0	0	1	0.392493	0.942507	437500	0.011778	0		1.00002	0.92005	0.000261545	0.000185207	0.000260491	00:00:00	240022	2023-05-12			3.36281e+08	2023-05-12	1.416e+07	0.925
2023-05-13	1.4193e+07	0			0.4	0	0	2.12895e+08	0	2.33997		0	2023-05-13	0.633077		1	0	0	0.537993	0	0	1	0.392503	0.942507	437800	0.011778	0		1.00002	0.918443	0.000261545	0.000185207	0.000260491	00:00:00	240022	2023-05-13			3.36287e+08	2023-05-13	1.416e+07	0.925
2023-05-14	1.4193e+07	0			0.4	0	0	2.12895e+08	0	2.33637		0	2023-05-14	0.633067		1	0	0	0.537282	0	0	1	0.392513	0.942507	438100	0.011778	0		1.00002	0.917055	0.000261545	0.000185207	0.000260491	00:00:00	240022	2023-05-14			3.36292e+08	2023-05-14	1.416e+07	0.925
2023-05-15	1.4193e+07	0			0.4	0	0	2.12895e+08	0	2.33324		0	2023-05-15	0.633056		1	0	0	0.536661	0	0	1	0.392522	0.942507	438400	0.011778	0		1.00002	0.915848	0.000261545	0.000185207	0.000260491	00:00:00	240022	2023-05-15			3.36298e+08	2023-05-15	1.41601e+07	0.925
2023-05-16	1.4193e+07	0			0.4	0	0	2.12895e+08	0	2.33052		0	2023-05-16	0.633046		1	0	0	0.53612	0	0	1	0.392532	0.942507	438700	0.011778	0		1.00002	0.914803	0.000261545	0.000185207	0.000260491	00:00:00	240022	2023-05-16			3.36303e+08	2023-05-16	1.41601e+07	0.925
2023-05-17	1.4193e+07	0			0.4	0	0	2.12895e+08	0	2.32816		0	2023-05-17	0.633035		1	0	0	0.535649	0	0	1	0.392541	0.942507	439000	0.011778	0		1.00002	0.913898	0.000261545	0.000185207	0.000260491	00:00:00	240022	2023-05-17			3.36309e+08	2023-05-17	1.41601e+07	0.925
2023-05-18	1.4193e+07	0			0.4	0	0	2.12895e+08	0	2.3261		0	2023-05-18	0.633025		1	0	0	0.53524	0	0	1	0.392551	0.942507	439300	0.011778	0		1.00002	0.913114	0.000261545	0.000185207	0.000260491	00:00:00	240022	2023-05-18			3.36314e+08	2023-05-18	1.41601e+07	0.925
2023-05-19	1.4193e+07	0			0.4	0	0	2.12895e+08	0	2.32432		0	2023-05-19	0.633015		1	0	0	0.534883	0	0	1	0.392561	0.942507	439600	0.011778	0		1.00002	0.912436	0.000261545	0.000185207	0.000260491	00:00:00	240022	2023-05-19			3.3632e+08	2023-05-19	1.41601e+07	0.925
2023-05-20	1.4193e+07	0			0.4	0	0	2.12895e+08	0	2.32277		0	2023-05-20	0.633004		1	0	0	0.534573	0	0	1	0.39257	0.942507	439900	0.011778	0		1.00002	0.91185	0.000261545	0.000185207	0.000260491	00:00:00	240022	2023-05-20			3.36325e+08	2023-05-20	1.41601e+07	0.925
2023-05-21	1.4193e+07	0			0.4	0	0	2.12895e+08	0	2.32142		0	2023-05-21	0.632994		1	0	0	0.534303	0	0	1	0.39258	0.942507	440200	0.011778	0		1.00002	0.911344	0.000261545	0.000185207	0.000260491	00:00:00	240022	2023-05-21			3.36331e+08	2023-05-21	1.41601e+07	0.925
2023-05-22	1.4193e+07	0			0.4	0	0	2.12895e+08	0	2.32025		0	2023-05-22	0.632983		1	0	0	0.534068	0	0	1	0.392589	0.942507	440500	0.011778	0		1.00002	0.910907	0.000261545	0.000185207	0.000260491	00:00:00	240022	2023-05-22			3.36336e+08	2023-05-22	1.41601e+07	0.925
2023-05-23	1.4193e+07	0			0.4	0	0	2.12895e+08	0	2.31924		0	2023-05-23	0.632973		1	0	0	0.533863	0	0	1	0.392599	0.942507	440800	0.011778	0		1.00002	0.91053	0.000261545	0.000185207	0.000260491	00:00:00	240022	2023-05-23			3.36342e+08	2023-05-23	1.41601e+07	0.925
2023-05-24	1.4193e+07	0			0.4	0	0	2.12895e+08	0	2.31835		0	2023-05-24	0.632962		1	0	0	0.533686	0	0	1	0.392609	0.942507	441100	0.011778	0		1.00002	0.910205	0.000261545	0.000185207	0.000260491	00:00:00	240022	2023-05-24			3.36347e+08	2023-05-24	1.41601e+07	0.925
2023-05-25	1.4193e+07	0			0.4	0	0	2.12895e+08	0	2.31759		0	2023-05-25	0.632952		1	0	0	0.533531	0	0	1	0.392618	0.942507	441400	0.011778	0		1.00002	0.909926	0.000261545	0.000185207	0.000260491	00:00:00	240022	2023-05-25			3.36353e+08	2023-05-25	1.41601e+07	0.925
2023-05-26	1.4193e+07	0			0.4	0	0	2.12895e+08	0	2.31692		0	2023-05-26	0.632942		1	0	0	0.533397	0	0	1	0.392628	0.942507	441700	0.011778	0		1.00002	0.909687	0.000261545	0.000185207	0.000260491	00:00:00	240022	2023-05-26			3.36358e+08	2023-05-26	1.41601e+07	0.925
2023-05-27	1.4193e+07	0			0.4	0	0	2.12895e+08	0	2.31634		0	2023-05-27	0.632931		1	0	0	0.53328	0	0	1	0.392637	0.942507	442000	0.011778	0		1.00002	0.909481	0.000261545	0.000185207	0.000260491	00:00:00	240022	2023-05-27			3.36364e+08	2023-05-27	1.41601e+07	0.925
2023-05-28	1.4193e+07	0			0.4	0	0	2.12895e+08	0	2.31584		0	2023-05-28	0.632921		1	0	0	0.533179	0	0	1	0.392647	0.942507	442300	0.011778	0		1.00002	0.909306	0.000261545	0.000185207	0.000260491	00:00:00	240022	2023-05-28			3.3637e+08	2023-05-28	1.41602e+07	0.925
2023-05-29	1.4193e+07	0			0.4	0	0	2.12895e+08	0	2.3154		0	2023-05-29	0.63291		1	0	0	0.533091	0	0	1	0.392656	0.942507	442600	0.011778	0		1.00002	0.909156	0.000261545	0.000185207	0.000260491	00:00:00	240022	2023-05-29			3.36375e+08	2023-05-29	1.41602e+07	0.925
2023-05-30	1.4193e+07	0			0.4	0	0	2.12895e+08	0	2.31502		0	2023-05-30	0.6329		1	0	0	0.533014	0	0	1	0.392666	0.942507	442900	0.011778	0		1.00002	0.909029	0.000261545	0.000185207	0.000260491	00:00:00	240022	2023-05-30			3.36381e+08	2023-05-30	1.41602e+07	0.925
2023-05-31	1.4193e+07	0			0.4	0	0	2.12895e+08	0	2.31469		0	2023-05-31	0.63289		1	0	0	0.532947	0	0	1	0.392676	0.942507	443200	0.011778	0		1.00002	0.908922	0.000261545	0.000185207	0.000260491	00:00:00	240022	2023-05-31			3.36386e+08	2023-05-31	1.41602e+07	0.925
2023-06-01	1.4193e+07	0			0.4	0	0	2.12895e+08	0	2.26753		0	2023-06-01	0.632879		1	0	0	0.481166	0	0	1	0.392685	0.942507	443500	0.011778	0		1.00002	0.890424	0.000261545	0.000185207	0.000260491	00:00:00	240022	2023-06-01			3.36392e+08	2023-06-01	1.41602e+07	0.85
2023-06-02	1.4193e+07	0			0.4	0	0	2.12895e+08	0	2.25556		0	2023-06-02	0.632869		1	0	0	0.478413	0	0	1	0.392695	0.942507	443800	0.011778	0		1.00002	0.885746	0.000261545	0.000185207	0.000260491	00:00:00	240022	2023-06-02			3.36397e+08	2023-06-02	1.41602e+07	0.85
2023-06-03	1.4193e+07	0			0.4	0	0	2.12895e+08	0	2.24069		0	2023-06-03	0.632858		1	0	0	0.474952	0	0	1	0.392704	0.942507	444100	0.011778	0		1.00002	0.87993	0.000261545	0.000185207	0.000260491	00:00:00	240022	2023-06-03			3.36403e+08	2023-06-03	1.41602e+07	0.85
2023-06-04	1.4193e+07	0			0.4	0	0	2.12895e+08	0	2.22219		0	2023-06-04	0.632848		1	0	0	0.470582	0	0	1	0.392714	0.942507	444400	0.011778	0		1.00002	0.872687	0.000261545	0.000185207	0.000260491	00:00:00	240022	2023-06-04			3.36408e+08	2023-06-04	1.41602e+07	0.85
2023-06-05	1.4193e+07	0			0.4	0	0	2.12895e+08	0	2.21086		0	2023-06-05	0.632838		1	0	0	0.467868	0	0	1	0.392724	0.942507	444700	0.011778	0		1.00002	0.868257	0.000261545	0.000185207	0.000260491	00:00:00	240022	2023-06-05			3.36414e+08	2023-06-05	1.41602e+07	0.85
2023-06-06	1.4193e+07	0			0.4	0	0	2.12895e+08	0	2.19969		0	2023-06-06	0.632827		1	0	0	0.465165	0	0	1	0.392733	0.942507	445000	0.011778	0		1.00002	0.86389	0.000261545	0.000185207	0.000260491	00:00:00	240022	2023-06-06			3.36419e+08	2023-06-06	1.41602e+07	0.85
2023-06-07	1.4193e+07	0			0.4	0	0	2.12895e+08	0	2.18944		0	2023-06-07	0.632817		1	0	0	0.46266	0	0	1	0.392743	0.942507	445300	0.011778	0		1.00002	0.859885	0.000261545	0.000185207	0.000260491	00:00:00	240022	2023-06-07			3.36425e+08	2023-06-07	1.41602e+07	0.85
2023-06-08	1.4193e+07	0			0.4	0	0	2.12895e+08	0	2.18125		0	2023-06-08	0.632806		1	0	0	0.460643	0	0	1	0.392752	0.942507	445600	0.011778	0		1.00002	0.856689	0.000261545	0.000185207	0.000260491	00:00:00	240022	2023-06-08			3.3643e+08	2023-06-08	1.41602e+07	0.85
2023-06-09	1.4193e+07	0			0.4	0	0	2.12895e+08	0	2.17384		0	2023-06-09	0.632796		1	0	0	0.458806	0	0	1	0.392762	0.942507	445900	0.011778	0		1.00002	0.853802	0.000261545	0.000185207	0.000260491	00:00:00	240022	2023-06-09			3.36436e+08	2023-06-09	1.41602e+07	0.85
2023-06-10	1.4193e+07	0			0.4	0	0	2.12895e+08	0	2.16738		0	2023-06-10	0.632786		1	0	0	0.457193	0	0	1	0.392771	0.942507	446200	0.011778	0		1.00002	0.851285	0.000261545	0.000185207	0.000260491	00:00:00	240022	2023-06-10			3.36441e+08	2023-06-10	1.41602e+07	0.85
2023-06-11	1.4193e+07	0			0.4	0	0	2.12895e+08	0	2.16187		0	2023-06-11	0.632775		1	0	0	0.455808	0	0	1	0.392781	0.942507	446500	0.011778	0		1.00002	0.849141	0.000261545	0.000185207	0.000260491	00:00:00	240022	2023-06-11			3.36447e+08	2023-06-11	1.41602e+07	0.85
2023-06-12	1.4193e+07	0			0.4	0	0	2.12895e+08	0	2.15702		0	2023-06-12	0.632765		1	0	0	0.454586	0	0	1	0.392791	0.942507	446800	0.011778	0		1.00002	0.847258	0.000261545	0.000185207	0.000260491	00:00:00	240022	2023-06-12			3.36452e+08	2023-06-12	1.41602e+07	0.85
2023-06-13	1.4193e+07	0			0.4	0	0	2.12895e+08	0	2.15282		0	2023-06-13	0.632754		1	0	0	0.453521	0	0	1	0.3928	0.942507	447100	0.011778	0		1.00002	0.845627	0.000261545	0.000185207	0.000260491	00:00:00	240022	2023-06-13			3.36458e+08	2023-06-13	1.41602e+07	0.85
2023-06-14	1.4193e+07	0			0.4	0	0	2.12895e+08	0	2.14918		0	2023-06-14	0.632744		1	0	0	0.452595	0	0	1	0.39281	0.942507	447400	0.011778	0		1.00002	0.844218	0.000261545	0.000185207	0.000260491	00:00:00	240022	2023-06-14			3.36464e+08	2023-06-14	1.41602e+07	0.85
2023-06-15	1.4193e+07	0			0.4	0	0	2.12895e+08	0	2.146		0	2023-06-15	0.632734		1	0	0	0.451786	0	0	1	0.392819	0.942507	447700	0.011778	0		1.00002	0.842992	0.000261545	0.000185207	0.000260491	00:00:00	240022	2023-06-15			3.36469e+08	2023-06-15	1.41602e+07	0.85
2023-06-16	1.4193e+07	0			0.4	0	0	2.12895e+08	0	2.14325		0	2023-06-16	0.632723		1	0	0	0.451081	0	0	1	0.392829	0.942507	448000	0.011778	0		1.00002	0.841931	0.000261545	0.000185207	0.000260491	00:00:00	240022	2023-06-16			3.36475e+08	2023-06-16	1.41602e+07	0.85
2023-06-17	1.4193e+07	0			0.4	0	0	2.12895e+08	0	2.14086		0	2023-06-17	0.632713		1	0	0	0.450468	0	0	1	0.392839	0.942507	448300	0.011778	0		1.00002	0.841011	0.000261545	0.000185207	0.000260491	00:00:00	240022	2023-06-17			3.3648e+08	2023-06-17	1.41602e+07	0.85
2023-06-18	1.4193e+07	0			0.4	0	0	2.12895e+08	0	2.13878		0	2023-06-18	0.632702		1	0	0	0.449933	0	0	1	0.392848	0.942507	448600	0.011778	0		1.00002	0.840215	0.000261545	0.000185207	0.000260491	00:00:00	240022	2023-06-18			3.36486e+08	2023-06-18	1.41602e+07	0.85
2023-06-19	1.4193e+07	0			0.4	0	0	2.12895e+08	0	2.13697		0	2023-06-19	0.632692		1	0	0	0.449468	0	0	1	0.392858	0.942507	448900	0.011778	0		1.00002	0.839526	0.000261545	0.000185207	0.000260491	00:00:00	240022	2023-06-19			3.36491e+08	2023-06-19	1.41602e+07	0.85
2023-06-20	1.4193e+07	0			0.4	0	0	2.12895e+08	0	2.1354		0	2023-06-20	0.632682		1	0	0	0.449064	0	0	1	0.392867	0.942507	449200	0.011778	0		1.00002	0.838929	0.000261545	0.000185207	0.000260491	00:00:00	240022	2023-06-20			3.36497e+08	2023-06-20	1.41602e+07	0.85
2023-06-21	1.4193e+07	0			0.4	0	0	2.12895e+08	0	2.13404		0	2023-06-21	0.632671		1	0	0	0.448711	0	0	1	0.392877	0.942507	449500	0.011778	0		1.00002	0.838414	0.000261545	0.000185207	0.000260491	00:00:00	240022	2023-06-21			3.36502e+08	2023-06-21	1.41602e+07	0.85
2023-06-22	1.4193e+07	0			0.4	0	0	2.12895e+08	0	2.13285		0	2023-06-22	0.632661		1	0	0	0.448405	0	0	1	0.392886	0.942507	449800	0.011778	0		1.00002	0.837969	0.000261545	0.000185207	0.000260491	00:00:00	240022	2023-06-22			3.36508e+08	2023-06-22	1.41602e+07	0.85
2023-06-23	1.4193e+07	0			0.4	0	0	2.12895e+08	0	2.13182		0	2023-06-23	0.63265		1	0	0	0.448139	0	0	1	0.392896	0.942507	450100	0.011778	0		1.00002	0.837585	0.000261545	0.000185207	0.000260491	00:00:00	240022	2023-06-23			3.36513e+08	2023-06-23	1.41602e+07	0.85
2023-06-24	1.4193e+07	0			0.4	0	0	2.12895e+08	0	2.13093		0	2023-06-24	0.63264		1	0	0	0.447907	0	0	1	0.392906	0.942507	450400	0.011778	0		1.00002	0.837254	0.000261545	0.000185207	0.000260491	00:00:00	240022	2023-06-24			3.36519e+08	2023-06-24	1.41602e+07	0.85
2023-06-25	1.4193e+07	0			0.4	0	0	2.12895e+08	0	2.13015		0	2023-06-25	0.63263		1	0	0	0.447706	0	0	1	0.392915	0.942507	450700	0.011778	0		1.00002	0.836969	0.000261545	0.000185207	0.000260491	00:00:00	240022	2023-06-25			3.36524e+08	2023-06-25	1.41602e+07	0.85
2023-06-26	1.4193e+07	0			0.4	0	0	2.12895e+08	0	2.12948		0	2023-06-26	0.632619		1	0	0	0.44753	0	0	1	0.392925	0.942507	451000	0.011778	0		1.00002	0.836724	0.000261545	0.000185207	0.000260491	00:00:00	240022	2023-06-26			3.3653e+08	2023-06-26	1.41602e+07	0.85
2023-06-27	1.4193e+07	0			0.4	0	0	2.12895e+08	0	2.12889		0	2023-06-27	0.632609		1	0	0	0.447378	0	0	1	0.392934	0.942507	451300	0.011778	0		1.00002	0.836513	0.000261545	0.000185207	0.000260491	00:00:00	240022	2023-06-27			3.36535e+08	2023-06-27	1.41602e+07	0.85
2023-06-28	1.4193e+07	0			0.4	0	0	2.12895e+08	0	2.12838		0	2023-06-28	0.632598		1	0	0	0.447246	0	0	1	0.392944	0.942507	451600	0.011778	0		1.00002	0.836333	0.000261545	0.000185207	0.000260491	00:00:00	240022	2023-06-28			3.36541e+08	2023-06-28	1.41602e+07	0.85
2023-06-29	1.4193e+07	0			0.4	0	0	2.12895e+08	0	2.12794		0	2023-06-29	0.632588		1	0	0	0.447131	0	0	1	0.392953	0.942507	451900	0.011778	0		1.00002	0.83618	0.000261545	0.000185207	0.000260491	00:00:00	240022	2023-06-29			3.36547e+08	2023-06-29	1.41602e+07	0.85
2023-06-30	1.4193e+07	0			0.4	0	0	2.12895e+08	0	2.12755		0	2023-06-30	0.632578		1	0	0	0.447031	0	0	1	0.392963	0.942507	452200	0.011778	0		1.00002	0.836049	0.000261545	0.000185207	0.000260491	00:00:00	240022	2023-06-30			3.36552e+08	2023-06-30	1.41602e+07	0.85
2023-07-01	1.4193e+07	0			0.4	0	0	2.12895e+08	0	2.12722		0	2023-07-01	0.632567		1	0	0	0.446944	0	0	1	0.392973	0.942507	452500	0.011778	0		1.00002	0.835938	0.000261545	0.000185207	0.000260491	00:00:00	240022	2023-07-01			3.36558e+08	2023-07-01	1.41602e+07	0.85
2023-07-02	1.4193e+07	0			0.4	0	0	2.12895e+08	0	2.12693		0	2023-07-02	0.632557		1	0	0	0.446868	0	0	1	0.392982	0.942507	452800	0.011778	0		1.00002	0.835844	0.000261545	0.000185207	0.000260491	00:00:00	240022	2023-07-02			3.36563e+08	2023-07-02	1.41602e+07	0.85
2023-07-03	1.4193e+07	0			0.4	0	0	2.12895e+08	0	2.12667		0	2023-07-03	0.632546		1	0	0	0.446802	0	0	1	0.392992	0.942507	453100	0.011778	0		1.00002	0.835765	0.000261545	0.000185207	0.000260491	00:00:00	240022	2023-07-03			3.36569e+08	2023-07-03	1.41602e+07	0.85
2023-07-04	1.4193e+07	0			0.4	0	0	2.12895e+08	0	2.12645		0	2023-07-04	0.632536		1	0	0	0.446745	0	0	1	0.393001	0.942507	453400	0.011778	0		1.00002	0.835699	0.000261545	0.000185207	0.000260491	00:00:00	240022	2023-07-04			3.36574e+08	2023-07-04	1.41602e+07	0.85
2023-07-05	1.4193e+07	0			0.4	0	0	2.12895e+08	0	2.12626		0	2023-07-05	0.632526		1	0	0	0.446696	0	0	1	0.393011	0.942507	453700	0.011778	0		1.00002	0.835645	0.000261545	0.000185207	0.000260491	00:00:00	240022	2023-07-05			3.3658e+08	2023-07-05	1.41602e+07	0.85
2023-07-06	1.4193e+07	0			0.4	0	0	2.12895e+08	0	2.1261		0	2023-07-06	0.632515		1	0	0	0.446653	0	0	1	0.39302	0.942507	454000	0.011778	0		1.00002	0.8356	0.000261545	0.000185207	0.000260491	00:00:00	240022	2023-07-06			3.36585e+08	2023-07-06	1.41602e+07	0.85
2023-07-07	1.4193e+07	0			0.4	0	0	2.12895e+08	0	2.12595		0	2023-07-07	0.632505		1	0	0	0.446615	0	0	1	0.39303	0.942507	454300	0.011778	0		1.00002	0.835564	0.000261545	0.000185207	0.000260491	00:00:00	240022	2023-07-07			3.36591e+08	2023-07-07	1.41602e+07	0.85
2023-07-08	1.4193e+07	0			0.4	0	0	2.12895e+08	0	2.12583		0	2023-07-08	0.632494		1	0	0	0.446583	0	0	1	0.39304	0.942507	454600	0.011778	0		1.00002	0.835535	0.000261545	0.000185207	0.000260491	00:00:00	240022	2023-07-08			3.36596e+08	2023-07-08	1.41602e+07	0.85
2023-07-09	1.4193e+07	0			0.4	0	0	2.12895e+08	0	2.12572		0	2023-07-09	0.632484		1	0	0	0.446554	0	0	1	0.393049	0.942507	454900	0.011778	0		1.00002	0.835513	0.000261545	0.000185207	0.000260491	00:00:00	240022	2023-07-09			3.36602e+08	2023-07-09	1.41602e+07	0.85
2023-07-10	1.4193e+07	0			0.4	0	0	2.12895e+08	0	2.12563		0	2023-07-10	0.632474		1	0	0	0.44653	0	0	1	0.393059	0.942507	455200	0.011778	0		1.00002	0.835496	0.000261545	0.000185207	0.000260491	00:00:00	240022	2023-07-10			3.36607e+08	2023-07-10	1.41602e+07	0.85
2023-07-11	1.4193e+07	0			0.4	0	0	2.12895e+08	0	2.12554		0	2023-07-11	0.632463		1	0	0	0.446508	0	0	1	0.393068	0.942507	455500	0.011778	0		1.00002	0.835484	0.000261545	0.000185207	0.000260491	00:00:00	240022	2023-07-11			3.36613e+08	2023-07-11	1.41602e+07	0.85
2023-07-12	1.4193e+07	0			0.4	0	0	2.12895e+08	0	2.12547		0	2023-07-12	0.632453		1	0	0	0.44649	0	0	1	0.393078	0.942507	455800	0.011778	0		1.00002	0.835476	0.000261545	0.000185207	0.000260491	00:00:00	240022	2023-07-12			3.36618e+08	2023-07-12	1.41602e+07	0.85
2023-07-13	1.4193e+07	0			0.4	0	0	2.12895e+08	0	2.12541		0	2023-07-13	0.632442		1	0	0	0.446474	0	0	1	0.393088	0.942507	456100	0.011778	0		1.00002	0.835472	0.000261545	0.000185207	0.000260491	00:00:00	240022	2023-07-13			3.36624e+08	2023-07-13	1.41602e+07	0.85
2023-07-14	1.4193e+07	0			0.4	0	0	2.12895e+08	0	2.12536		0	2023-07-14	0.632432		1	0	0	0.44646	0	0	1	0.393097	0.942507	456400	0.011778	0		1.00002	0.835471	0.000261545	0.000185207	0.000260491	00:00:00	240022	2023-07-14			3.36629e+08	2023-07-14	1.41602e+07	0.85
2023-07-15	1.4193e+07	0			0.4	0	0	2.12895e+08	0	2.12531		0	2023-07-15	0.632422		1	0	0	0.446447	0	0	1	0.393107	0.942507	456700	0.011778	0		1.00002	0.835473	0.000261545	0.000185207	0.000260491	00:00:00	240022	2023-07-15			3.36635e+08	2023-07-15	1.41602e+07	0.85
2023-07-16	1.4193e+07	0			0.4	0	0	2.12895e+08	0	2.12527		0	2023-07-16	0.632411		1	0	0	0.446437	0	0	1	0.393116	0.942507	457000	0.011778	0		1.00002	0.835478	0.000261545	0.000185207	0.000260491	00:00:00	240022	2023-07-16			3.36641e+08	2023-07-16	1.41602e+07	0.85
2023-07-17	1.4193e+07	0			0.4	0	0	2.12895e+08	0	2.12523		0	2023-07-17	0.632401		1	0	0	0.446428	0	0	1	0.393126	0.942507	457300	0.011778	0		1.00002	0.835484	0.000261545	0.000185207	0.000260491	00:00:00	240022	2023-07-17			3.36646e+08	2023-07-17	1.41602e+07	0.85
2023-07-18	1.4193e+07	0			0.4	0	0	2.12895e+08	0	2.1252		0	2023-07-18	0.63239		1	0	0	0.44642	0	0	1	0.393135	0.942507	457600	0.011778	0		1.00002	0.835493	0.000261545	0.000185207	0.000260491	00:00:00	240022	2023-07-18			3.36652e+08	2023-07-18	1.41602e+07	0.85
2023-07-19	1.4193e+07	0			0.4	0	0	2.12895e+08	0	2.12518		0	2023-07-19	0.63238		1	0	0	0.446413	0	0	1	0.393145	0.942507	457900	0.011778	0		1.00002	0.835502	0.000261545	0.000185207	0.000260491	00:00:00	240022	2023-07-19			3.36657e+08	2023-07-19	1.41602e+07	0.85
2023-07-20	1.4193e+07	0			0.4	0	0	2.12895e+08	0	2.12515		0	2023-07-20	0.63237		1	0	0	0.446407	0	0	1	0.393155	0.942507	458200	0.011778	0		1.00002	0.835514	0.000261545	0.000185207	0.000260491	00:00:00	240022	2023-07-20			3.36663e+08	2023-07-20	1.41602e+07	0.85
2023-07-21	1.4193e+07	0			0.4	0	0	2.12895e+08	0	2.12513		0	2023-07-21	0.632359		1	0	0	0.446402	0	0	1	0.393164	0.942507	458500	0.011778	0		1.00002	0.835526	0.000261545	0.000185207	0.000260491	00:00:00	240022	2023-07-21			3.36668e+08	2023-07-21	1.41602e+07	0.85
2023-07-22	1.4193e+07	0			0.4	0	0	2.12895e+08	0	2.12512		0	2023-07-22	0.632349		1	0	0	0.446397	0	0	1	0.393174	0.942507	458800	0.011778	0		1.00002	0.83554	0.000261545	0.000185207	0.000260491	00:00:00	240022	2023-07-22			3.36674e+08	2023-07-22	1.41602e+07	0.85
2023-07-23	1.4193e+07	0			0.4	0	0	2.12895e+08	0	2.1251		0	2023-07-23	0.632339		1	0	0	0.446393	0	0	1	0.393183	0.942507	459100	0.011778	0		1.00002	0.835554	0.000261545	0.000185207	0.000260491	00:00:00	240022	2023-07-23			3.36679e+08	2023-07-23	1.41602e+07	0.85
2023-07-24	1.4193e+07	0			0.4	0	0	2.12895e+08	0	2.12509		0	2023-07-24	0.632328		1	0	0	0.44639	0	0	1	0.393193	0.942507	459400	0.011778	0		1.00002	0.835569	0.000261545	0.000185207	0.000260491	00:00:00	240022	2023-07-24			3.36685e+08	2023-07-24	1.41602e+07	0.85
2023-07-25	1.4193e+07	0			0.4	0	0	2.12895e+08	0	2.12508		0	2023-07-25	0.632318		1	0	0	0.446387	0	0	1	0.393202	0.942507	459700	0.011778	0		1.00002	0.835585	0.000261545	0.000185207	0.000260491	00:00:00	240022	2023-07-25			3.3669e+08	2023-07-25	1.41602e+07	0.85
2023-07-26	1.4193e+07	0			0.4	0	0	2.12895e+08	0	2.12507		0	2023-07-26	0.632307		1	0	0	0.446384	0	0	1	0.393212	0.942507	460000	0.011778	0		1.00002	0.835601	0.000261545	0.000185207	0.000260491	00:00:00	240022	2023-07-26			3.36696e+08	2023-07-26	1.41602e+07	0.85
2023-07-27	1.4193e+07	0			0.4	0	0	2.12895e+08	0	2.12506		0	2023-07-27	0.632297		1	0	0	0.446382	0	0	1	0.393222	0.942507	460300	0.011778	0		1.00002	0.835618	0.000261545	0.000185207	0.000260491	00:00:00	240022	2023-07-27			3.36701e+08	2023-07-27	1.41602e+07	0.85
2023-07-28	1.4193e+07	0			0.4	0	0	2.12895e+08	0	2.12505		0	2023-07-28	0.632287		1	0	0	0.44638	0	0	1	0.393231	0.942507	460600	0.011778	0		1.00002	0.835636	0.000261545	0.000185207	0.000260491	00:00:00	240022	2023-07-28			3.36707e+08	2023-07-28	1.41602e+07	0.85
2023-07-29	1.4193e+07	0			0.4	0	0	2.12895e+08	0	2.12504		0	2023-07-29	0.632276		1	0	0	0.446378	0	0	1	0.393241	0.942507	460900	0.011778	0		1.00002	0.835653	0.000261545	0.000185207	0.000260491	00:00:00	240022	2023-07-29			3.36713e+08	2023-07-29	1.41602e+07	0.85
2023-07-30	1.4193e+07	0			0.4	0	0	2.12895e+08	0	2.12504		0	2023-07-30	0.632266		1	0	0	0.446377	0	0	1	0.39325	0.942507	461200	0.011778	0		1.00002	0.835672	0.000261545	0.000185207	0.000260491	00:00:00	240022	2023-07-30			3.36718e+08	2023-07-30	1.41602e+07	0.85
2023-07-31	1.4193e+07	0			0.4	0	0	2.12895e+08	0	2.12503		0	2023-07-31	0.632255		1	0	0	0.446375	0	0	1	0.39326	0.942507	461500	0.011778	0		1.00002	0.83569	0.000261545	0.000185207	0.000260491	00:00:00	240022	2023-07-31			3.36724e+08	2023-07-31	1.41602e+07	0.85
2023-08-01	1.4193e+07	0			0.4	0	0	2.12895e+08	0	2.12503		0	2023-08-01	0.632245		1	0	0	0.446374	0	0	1	0.393269	0.942507	461800	0.011778	0		1.00002	0.835709	0.000261545	0.000185207	0.000260491	00:00:00	240022	2023-08-01			3.36729e+08	2023-08-01	1.41602e+07	0.85
2023-08-02	1.4193e+07	0			0.4	0	0	2.12895e+08	0	2.12502		0	2023-08-02	0.632235		1	0	0	0.446373	0	0	1	0.393279	0.942507	462100	0.011778	0		1.00002	0.835727	0.000261545	0.000185207	0.000260491	00:00:00	240022	2023-08-02			3.36735e+08	2023-08-02	1.41602e+07	0.85
2023-08-03	1.4193e+07	0			0.4	0	0	2.12895e+08	0	2.12502		0	2023-08-03	0.632224		1	0	0	0.446372	0	0	1	0.393289	0.942507	462400	0.011778	0		1.00002	0.835747	0.000261545	0.000185207	0.000260491	00:00:00	240022	2023-08-03			3.3674e+08	2023-08-03	1.41602e+07	0.85
2023-08-04	1.4193e+07	0			0.4	0	0	2.12895e+08	0	2.12502		0	2023-08-04	0.632214		1	0	0	0.446372	0	0	1	0.393298	0.942507	462700	0.011778	0		1.00002	0.835766	0.000261545	0.000185207	0.000260491	00:00:00	240022	2023-08-04			3.36746e+08	2023-08-04	1.41602e+07	0.85
2023-08-05	1.4193e+07	0			0.4	0	0	2.12895e+08	0	2.12502		0	2023-08-05	0.632203		1	0	0	0.446371	0	0	1	0.393308	0.942507	463000	0.011778	0		1.00002	0.835785	0.000261545	0.000185207	0.000260491	00:00:00	240022	2023-08-05			3.36751e+08	2023-08-05	1.41602e+07	0.85
2023-08-06	1.4193e+07	0			0.4	0	0	2.12895e+08	0	2.12501		0	2023-08-06	0.632193		1	0	0	0.44637	0	0	1	0.393317	0.942507	463300	0.011778	0		1.00002	0.835805	0.000261545	0.000185207	0.000260491	00:00:00	240022	2023-08-06			3.36757e+08	2023-08-06	1.41602e+07	0.85
2023-08-07	1.4193e+07	0			0.4	0	0	2.12895e+08	0	2.12501		0	2023-08-07	0.632183		1	0	0	0.44637	0	0	1	0.393327	0.942507	463600	0.011778	0		1.00002	0.835824	0.000261545	0.000185207	0.000260491	00:00:00	240022	2023-08-07			3.36762e+08	2023-08-07	1.41602e+07	0.85
2023-08-08	1.4193e+07	0			0.4	0	0	2.12895e+08	0	2.12501		0	2023-08-08	0.632172		1	0	0	0.44637	0	0	1	0.393336	0.942507	463900	0.011778	0		1.00002	0.835844	0.000261545	0.000185207	0.000260491	00:00:00	240022	2023-08-08			3.36768e+08	2023-08-08	1.41602e+07	0.85
2023-08-09	1.4193e+07	0			0.4	0	0	2.12895e+08	0	2.12501		0	2023-08-09	0.632162		1	0	0	0.446369	0	0	1	0.393346	0.942507	464200	0.011778	0		1.00002	0.835864	0.000261545	0.000185207	0.000260491	00:00:00	240022	2023-08-09			3.36773e+08	2023-08-09	1.41602e+07	0.85
2023-08-10	1.4193e+07	0			0.4	0	0	2.12895e+08	0	2.12501		0	2023-08-10	0.632151		1	0	0	0.446369	0	0	1	0.393356	0.942507	464500	0.011778	0		1.00002	0.835884	0.000261545	0.000185207	0.000260491	00:00:00	240022	2023-08-10			3.36779e+08	2023-08-10	1.41602e+07	0.85
2023-08-11	1.4193e+07	0			0.4	0	0	2.12895e+08	0	2.12501		0	2023-08-11	0.632141		1	0	0	0.446369	0	0	1	0.393365	0.942507	464800	0.011778	0		1.00002	0.835904	0.000261545	0.000185207	0.000260491	00:00:00	240022	2023-08-11			3.36784e+08	2023-08-11	1.41602e+07	0.85
2023-08-12	1.4193e+07	0			0.4	0	0	2.12895e+08	0	2.12501		0	2023-08-12	0.632131		1	0	0	0.446368	0	0	1	0.393375	0.942507	465100	0.011778	0		1.00002	0.835924	0.000261545	0.000185207	0.000260491	00:00:00	240022	2023-08-12			3.3679e+08	2023-08-12	1.41602e+07	0.85
2023-08-13	1.4193e+07	0			0.4	0	0	2.12895e+08	0	2.12501		0	2023-08-13	0.63212		1	0	0	0.446368	0	0	1	0.393384	0.942507	465400	0.011778	0		1.00002	0.835944	0.000261545	0.000185207	0.000260491	00:00:00	240022	2023-08-13			3.36796e+08	2023-08-13	1.41602e+07	0.85
2023-08-14	1.4193e+07	0			0.4	0	0	2.12895e+08	0	2.125		0	2023-08-14	0.63211		1	0	0	0.446368	0	0	1	0.393394	0.942507	465700	0.011778	0		1.00002	0.835964	0.000261545	0.000185207	0.000260491	00:00:00	240022	2023-08-14			3.36801e+08	2023-08-14	1.41602e+07	0.85
2023-08-15	1.4193e+07	0			0.4	0	0	2.12895e+08	0	2.125		0	2023-08-15	0.632099		1	0	0	0.446368	0	0	1	0.393403	0.942507	466000	0.011778	0		1.00002	0.835984	0.000261545	0.000185207	0.000260491	00:00:00	240022	2023-08-15			3.36807e+08	2023-08-15	1.41602e+07	0.85
2023-08-16	1.4193e+07	0			0.4	0	0	2.12895e+08	0	2.125		0	2023-08-16	0.632089		1	0	0	0.446368	0	0	1	0.393413	0.942507	466300	0.011778	0		1.00002	0.836004	0.000261545	0.000185207	0.000260491	00:00:00	240022	2023-08-16			3.36812e+08	2023-08-16	1.41602e+07	0.85
2023-08-17	1.4193e+07	0			0.4	0	0	2.12895e+08	0	2.125		0	2023-08-17	0.632079		1	0	0	0.446368	0	0	1	0.393422	0.942507	466600	0.011778	0		1.00002	0.836024	0.000261545	0.000185207	0.000260491	00:00:00	240022	2023-08-17			3.36818e+08	2023-08-17	1.41602e+07	0.85
2023-08-18	1.4193e+07	0			0.4	0	0	2.12895e+08	0	2.125		0	2023-08-18	0.632068		1	0	0	0.446367	0	0	1	0.393432	0.942507	466900	0.011778	0		1.00002	0.836044	0.000261545	0.000185207	0.000260491	00:00:00	240022	2023-08-18			3.36823e+08	2023-08-18	1.41602e+07	0.85
2023-08-19	1.4193e+07	0			0.4	0	0	2.12895e+08	0	2.125		0	2023-08-19	0.632058		1	0	0	0.446367	0	0	1	0.393442	0.942507	467200	0.011778	0		1.00002	0.836064	0.000261545	0.000185207	0.000260491	00:00:00	240022	2023-08-19			3.36829e+08	2023-08-19	1.41602e+07	0.85
2023-08-20	1.4193e+07	0			0.4	0	0	2.12895e+08	0	2.125		0	2023-08-20	0.632048		1	0	0	0.446367	0	0	1	0.393451	0.942507	467500	0.011778	0		1.00002	0.836085	0.000261545	0.000185207	0.000260491	00:00:00	240022	2023-08-20			3.36834e+08	2023-08-20	1.41602e+07	0.85
2023-08-21	1.4193e+07	0			0.4	0	0	2.12895e+08	0	2.125		0	2023-08-21	0.632037		1	0	0	0.446367	0	0	1	0.393461	0.942507	467800	0.011778	0		1.00002	0.836105	0.000261545	0.000185207	0.000260491	00:00:00	240022	2023-08-21			3.3684e+08	2023-08-21	1.41602e+07	0.85
2023-08-22	1.4193e+07	0			0.4	0	0	2.12895e+08	0	2.125		0	2023-08-22	0.632027		1	0	0	0.446367	0	0	1	0.39347	0.942507	468100	0.011778	0		1.00002	0.836125	0.000261545	0.000185207	0.000260491	00:00:00	240022	2023-08-22			3.36845e+08	2023-08-22	1.41602e+07	0.85
2023-08-23	1.4193e+07	0			0.4	0	0	2.12895e+08	0	2.125		0	2023-08-23	0.632016		1	0	0	0.446367	0	0	1	0.39348	0.942507	468400	0.011778	0		1.00002	0.836145	0.000261545	0.000185207	0.000260491	00:00:00	240022	2023-08-23			3.36851e+08	2023-08-23	1.41602e+07	0.85
2023-08-24	1.4193e+07	0			0.4	0	0	2.12895e+08	0	2.125		0	2023-08-24	0.632006		1	0	0	0.446367	0	0	1	0.393489	0.942507	468700	0.011778	0		1.00002	0.836166	0.000261545	0.000185207	0.000260491	00:00:00	240022	2023-08-24			3.36856e+08	2023-08-24	1.41602e+07	0.85
2023-08-25	1.4193e+07	0			0.4	0	0	2.12895e+08	0	2.125		0	2023-08-25	0.631996		1	0	0	0.446367	0	0	1	0.393499	0.942507	469000	0.011778	0		1.00002	0.836186	0.000261545	0.000185207	0.000260491	00:00:00	240022	2023-08-25			3.36862e+08	2023-08-25	1.41602e+07	0.85
2023-08-26	1.4193e+07	0			0.4	0	0	2.12895e+08	0	2.125		0	2023-08-26	0.631985		1	0	0	0.446367	0	0	1	0.393509	0.942507	469300	0.011778	0		1.00002	0.836206	0.000261545	0.000185207	0.000260491	00:00:00	240022	2023-08-26			3.36868e+08	2023-08-26	1.41602e+07	0.85
2023-08-27	1.4193e+07	0			0.4	0	0	2.12895e+08	0	2.125		0	2023-08-27	0.631975		1	0	0	0.446367	0	0	1	0.393518	0.942507	469600	0.011778	0		1.00002	0.836226	0.000261545	0.000185207	0.000260491	00:00:00	240022	2023-08-27			3.36873e+08	2023-08-27	1.41602e+07	0.85
2023-08-28	1.4193e+07	0			0.4	0	0	2.12895e+08	0	2.125		0	2023-08-28	0.631964		1	0	0	0.446367	0	0	1	0.393528	0.942507	469900	0.011778	0		1.00002	0.836247	0.000261545	0.000185207	0.000260491	00:00:00	240022	2023-08-28			3.36879e+08	2023-08-28	1.41602e+07	0.85
2023-08-29	1.4193e+07	0			0.4	0	0	2.12895e+08	0	2.125		0	2023-08-29	0.631954		1	0	0	0.446367	0	0	1	0.393537	0.942507	470200	0.011778	0		1.00002	0.836267	0.000261545	0.000185207	0.000260491	00:00:00	240022	2023-08-29			3.36884e+08	2023-08-29	1.41602e+07	0.85
2023-08-30	1.4193e+07	0			0.4	0	0	2.12895e+08	0	2.125		0	2023-08-30	0.631944		1	0	0	0.446367	0	0	1	0.393547	0.942507	470500	0.011778	0		1.00002	0.836287	0.000261545	0.000185207	0.000260491	00:00:00	240022	2023-08-30			3.3689e+08	2023-08-30	1.41602e+07	0.85
2023-08-31	1.4193e+07	0			0.4	0	0	2.12895e+08	0	2.125		0	2023-08-31	0.631933		1	0	0	0.446367	0	0	1	0.393556	0.942507	470800	0.011778	0		1.00002	0.836308	0.000261545	0.000185207	0.000260491	00:00:00	240022	2023-08-31			3.36895e+08	2023-08-31	1.41602e+07	0.85
2023-09-01	1.4193e+07	0			0.4	0	0	2.12895e+08	0	2.17188		0	2023-09-01	0.631923		1	0	0	0.502236	0	0	1	0.393566	0.942507	471100	0.011778	0		1.00002	0.854776	0.000261545	0.000185207	0.000260491	00:00:00	240022	2023-09-01			3.36901e+08	2023-09-01	1.41602e+07	0.925
2023-09-02	1.4193e+07	0			0.4	0	0	2.12895e+08	0	2.18359		0	2023-09-02	0.631912		1	0	0	0.504907	0	0	1	0.393576	0.942507	471400	0.011778	0		1.00002	0.859409	0.000261545	0.000185207	0.000260491	00:00:00	240022	2023-09-02			3.36906e+08	2023-09-02	1.41602e+07	0.925
2023-09-03	1.4193e+07	0			0.4	0	0	2.12895e+08	0	2.19824		0	2023-09-03	0.631902		1	0	0	0.508207	0	0	1	0.393585	0.942507	471700	0.011778	0		1.00002	0.865196	0.000261545	0.000185207	0.000260491	00:00:00	240022	2023-09-03			3.36912e+08	2023-09-03	1.41602e+07	0.925
2023-09-04	1.4193e+07	0			0.4	0	0	2.12895e+08	0	2.21655		0	2023-09-04	0.631892		1	0	0	0.512269	0	0	1	0.393595	0.942507	472000	0.011778	0		1.00002	0.872424	0.000261545	0.000185207	0.000260491	00:00:00	240022	2023-09-04			3.36917e+08	2023-09-04	1.41602e+07	0.925
2023-09-05	1.4193e+07	0			0.4	0	0	2.12895e+08	0	2.22772		0	2023-09-05	0.631881		1	0	0	0.514715	0	0	1	0.393604	0.942507	472300	0.011778	0		1.00002	0.876841	0.000261545	0.000185207	0.000260491	00:00:00	240022	2023-09-05			3.36923e+08	2023-09-05	1.41602e+07	0.925
2023-09-06	1.4193e+07	0			0.4	0	0	2.12895e+08	0	2.23875		0	2023-09-06	0.631871		1	0	0	0.517106	0	0	1	0.393614	0.942507	472600	0.011778	0		1.00002	0.881205	0.000261545	0.000185207	0.000260491	00:00:00	240022	2023-09-06			3.36928e+08	2023-09-06	1.41602e+07	0.925
2023-09-07	1.4193e+07	0			0.4	0	0	2.12895e+08	0	2.24888		0	2023-09-07	0.631861		1	0	0	0.519281	0	0	1	0.393623	0.942507	472900	0.011778	0		1.00002	0.885213	0.000261545	0.000185207	0.000260491	00:00:00	240022	2023-09-07			3.36934e+08	2023-09-07	1.41602e+07	0.925
2023-09-08	1.4193e+07	0			0.4	0	0	2.12895e+08	0	2.25696		0	2023-09-08	0.63185		1	0	0	0.521002	0	0	1	0.393633	0.942507	473200	0.011778	0		1.00002	0.888416	0.000261545	0.000185207	0.000260491	00:00:00	240022	2023-09-08			3.3694e+08	2023-09-08	1.41602e+07	0.925
2023-09-09	1.4193e+07	0			0.4	0	0	2.12895e+08	0	2.26428		0	2023-09-09	0.63184		1	0	0	0.522549	0	0	1	0.393643	0.942507	473500	0.011778	0		1.00002	0.891315	0.000261545	0.000185207	0.000260491	00:00:00	240022	2023-09-09			3.36945e+08	2023-09-09	1.41602e+07	0.925
2023-09-10	1.4193e+07	0			0.4	0	0	2.12895e+08	0	2.27066		0	2023-09-10	0.631829		1	0	0	0.52389	0	0	1	0.393652	0.942507	473800	0.011778	0		1.00002	0.893848	0.000261545	0.000185207	0.000260491	00:00:00	240022	2023-09-10			3.36951e+08	2023-09-10	1.41602e+07	0.925
2023-09-11	1.4193e+07	0			0.4	0	0	2.12895e+08	0	2.2761		0	2023-09-11	0.631819		1	0	0	0.525029	0	0	1	0.393662	0.942507	474100	0.011778	0		1.00002	0.896013	0.000261545	0.000185207	0.000260491	00:00:00	240022	2023-09-11			3.36956e+08	2023-09-11	1.41602e+07	0.925
2023-09-12	1.4193e+07	0			0.4	0	0	2.12895e+08	0	2.28088		0	2023-09-12	0.631809		1	0	0	0.526025	0	0	1	0.393671	0.942507	474400	0.011778	0		1.00002	0.897918	0.000261545	0.000185207	0.000260491	00:00:00	240022	2023-09-12			3.36962e+08	2023-09-12	1.41602e+07	0.925
2023-09-13	1.4193e+07	0			0.4	0	0	2.12895e+08	0	2.28503		0	2023-09-13	0.631798		1	0	0	0.526886	0	0	1	0.393681	0.942507	474700	0.011778	0		1.00002	0.899574	0.000261545	0.000185207	0.000260491	00:00:00	240022	2023-09-13			3.36967e+08	2023-09-13	1.41602e+07	0.925
2023-09-14	1.4193e+07	0			0.4	0	0	2.12895e+08	0	2.28863		0	2023-09-14	0.631788		1	0	0	0.527629	0	0	1	0.39369	0.942507	475000	0.011778	0		1.00002	0.901011	0.000261545	0.000185207	0.000260491	00:00:00	240022	2023-09-14			3.36973e+08	2023-09-14	1.41602e+07	0.925
2023-09-15	1.4193e+07	0			0.4	0	0	2.12895e+08	0	2.29176		0	2023-09-15	0.631777		1	0	0	0.528275	0	0	1	0.3937	0.942507	475300	0.011778	0		1.00002	0.902266	0.000261545	0.000185207	0.000260491	00:00:00	240022	2023-09-15			3.36978e+08	2023-09-15	1.41602e+07	0.925
2023-09-16	1.4193e+07	0			0.4	0	0	2.12895e+08	0	2.29448		0	2023-09-16	0.631767		1	0	0	0.528834	0	0	1	0.393709	0.942507	475600	0.011778	0		1.00002	0.903359	0.000261545	0.000185207	0.000260491	00:00:00	240022	2023-09-16			3.36984e+08	2023-09-16	1.41602e+07	0.925
2023-09-17	1.4193e+07	0			0.4	0	0	2.12895e+08	0	2.29684		0	2023-09-17	0.631757		1	0	0	0.529319	0	0	1	0.393719	0.942507	475900	0.011778	0		1.00002	0.904311	0.000261545	0.000185207	0.000260491	00:00:00	240022	2023-09-17			3.36989e+08	2023-09-17	1.41602e+07	0.925
2023-09-18	1.4193e+07	0			0.4	0	0	2.12895e+08	0	2.2989		0	2023-09-18	0.631746		1	0	0	0.529739	0	0	1	0.393729	0.942507	476200	0.011778	0		1.00002	0.905141	0.000261545	0.000185207	0.000260491	00:00:00	240022	2023-09-18			3.36995e+08	2023-09-18	1.41602e+07	0.925
2023-09-19	1.4193e+07	0			0.4	0	0	2.12895e+08	0	2.30068		0	2023-09-19	0.631736		1	0	0	0.530104	0	0	1	0.393738	0.942507	476500	0.011778	0		1.00002	0.905866	0.000261545	0.000185207	0.000260491	00:00:00	240022	2023-09-19			3.37e+08	2023-09-19	1.41602e+07	0.925
2023-09-20	1.4193e+07	0			0.4	0	0	2.12895e+08	0	2.30223		0	2023-09-20	0.631726		1	0	0	0.53042	0	0	1	0.393748	0.942507	476800	0.011778	0		1.00002	0.906498	0.000261545	0.000185207	0.000260491	00:00:00	240022	2023-09-20			3.37006e+08	2023-09-20	1.41602e+07	0.925
2023-09-21	1.4193e+07	0			0.4	0	0	2.12895e+08	0	2.30358		0	2023-09-21	0.631715		1	0	0	0.530695	0	0	1	0.393757	0.942507	477100	0.011778	0		1.00002	0.90705	0.000261545	0.000185207	0.000260491	00:00:00	240022	2023-09-21			3.37012e+08	2023-09-21	1.41602e+07	0.925
2023-09-22	1.4193e+07	0			0.4	0	0	2.12895e+08	0	2.30475		0	2023-09-22	0.631705		1	0	0	0.530933	0	0	1	0.393767	0.942507	477400	0.011778	0		1.00002	0.907533	0.000261545	0.000185207	0.000260491	00:00:00	240022	2023-09-22			3.37017e+08	2023-09-22	1.41602e+07	0.925
2023-09-23	1.4193e+07	0			0.4	0	0	2.12895e+08	0	2.30576		0	2023-09-23	0.631694		1	0	0	0.53114	0	0	1	0.393776	0.942507	477700	0.011778	0		1.00002	0.907955	0.000261545	0.000185207	0.000260491	00:00:00	240022	2023-09-23			3.37023e+08	2023-09-23	1.41602e+07	0.925
2023-09-24	1.4193e+07	0			0.4	0	0	2.12895e+08	0	2.30665		0	2023-09-24	0.631684		1	0	0	0.531319	0	0	1	0.393786	0.942507	478000	0.011778	0		1.00002	0.908325	0.000261545	0.000185207	0.000260491	00:00:00	240022	2023-09-24			3.37028e+08	2023-09-24	1.41602e+07	0.925
2023-09-25	1.4193e+07	0			0.4	0	0	2.12895e+08	0	2.30741		0	2023-09-25	0.631674		1	0	0	0.531475	0	0	1	0.393796	0.942507	478300	0.011778	0		1.00002	0.908649	0.000261545	0.000185207	0.000260491	00:00:00	240022	2023-09-25			3.37034e+08	2023-09-25	1.41602e+07	0.925
2023-09-26	1.4193e+07	0			0.4	0	0	2.12895e+08	0	2.30808		0	2023-09-26	0.631663		1	0	0	0.53161	0	0	1	0.393805	0.942507	478600	0.011778	0		1.00002	0.908934	0.000261545	0.000185207	0.000260491	00:00:00	240022	2023-09-26			3.37039e+08	2023-09-26	1.41602e+07	0.925
2023-09-27	1.4193e+07	0			0.4	0	0	2.12895e+08	0	2.30866		0	2023-09-27	0.631653		1	0	0	0.531728	0	0	1	0.393815	0.942507	478900	0.011778	0		1.00002	0.909184	0.000261545	0.000185207	0.000260491	00:00:00	240022	2023-09-27			3.37045e+08	2023-09-27	1.41602e+07	0.925
2023-09-28	1.4193e+07	0			0.4	0	0	2.12895e+08	0	2.30916		0	2023-09-28	0.631642		1	0	0	0.53183	0	0	1	0.393824	0.942507	479200	0.011778	0		1.00002	0.909405	0.000261545	0.000185207	0.000260491	00:00:00	240022	2023-09-28			3.3705e+08	2023-09-28	1.41602e+07	0.925
2023-09-29	1.4193e+07	0			0.4	0	0	2.12895e+08	0	2.3096		0	2023-09-29	0.631632		1	0	0	0.531919	0	0	1	0.393834	0.942507	479500	0.011778	0		1.00002	0.909599	0.000261545	0.000185207	0.000260491	00:00:00	240022	2023-09-29			3.37056e+08	2023-09-29	1.41602e+07	0.925
2023-09-30	1.4193e+07	0			0.4	0	0	2.12895e+08	0	2.30998		0	2023-09-30	0.631622		1	0	0	0.531996	0	0	1	0.393843	0.942507	479800	0.011778	0		1.00002	0.909771	0.000261545	0.000185207	0.000260491	00:00:00	240022	2023-09-30			3.37061e+08	2023-09-30	1.41602e+07	0.925
2023-10-01	1.4193e+07	0			0.4	0	0	2.12895e+08	0	2.35719		0	2023-10-01	0.631611		1	0	0	0.575765	0	0	1	0.393853	0.942507	480100	0.011778	0		1.00002	0.928385	0.000261545	0.000185207	0.000260491	00:00:00	240022	2023-10-01			3.37067e+08	2023-10-01	1.41602e+07	1
2023-10-02	1.4193e+07	0			0.4	0	0	2.12895e+08	0	2.36919		0	2023-10-02	0.631601		1	0	0	0.577915	0	0	1	0.393863	0.942507	480400	0.011778	0		1.00002	0.933136	0.000261545	0.000185207	0.000260491	00:00:00	240022	2023-10-02			3.37072e+08	2023-10-02	1.41602e+07	1
2023-10-03	1.4193e+07	0			0.4	0	0	2.12895e+08	0	2.38409		0	2023-10-03	0.631591		1	0	0	0.580553	0	0	1	0.393872	0.942507	480700	0.011778	0		1.00002	0.939027	0.000261545	0.000185207	0.000260491	00:00:00	240022	2023-10-03			3.37078e+08	2023-10-03	1.41602e+07	1
2023-10-04	1.4193e+07	0			0.4	0	0	2.12895e+08	0	2.40262		0	2023-10-04	0.63158		1	0	0	0.583787	0	0	1	0.393882	0.942507	481000	0.011778	0		1.00002	0.946347	0.000261545	0.000185207	0.000260491	00:00:00	240022	2023-10-04			3.37084e+08	2023-10-04	1.41602e+07	1
2023-10-05	1.4193e+07	0			0.4	0	0	2.12895e+08	0	2.41397		0	2023-10-05	0.63157		1	0	0	0.585745	0	0	1	0.393891	0.942507	481300	0.011778	0		1.00002	0.950843	0.000261545	0.000185207	0.000260491	00:00:00	240022	2023-10-05			3.37089e+08	2023-10-05	1.41602e+07	1
2023-10-06	1.4193e+07	0			0.4	0	0	2.12895e+08	0	2.42517		0	2023-10-06	0.631559		1	0	0	0.587658	0	0	1	0.393901	0.942507	481600	0.011778	0		1.00002	0.955277	0.000261545	0.000185207	0.000260491	00:00:00	240022	2023-10-06			3.37095e+08	2023-10-06	1.41602e+07	1
2023-10-07	1.4193e+07	0			0.4	0	0	2.12895e+08	0	2.43544		0	2023-10-07	0.631549		1	0	0	0.589397	0	0	1	0.39391	0.942507	481900	0.011778	0		1.00002	0.959345	0.000261545	0.000185207	0.000260491	00:00:00	240022	2023-10-07			3.371e+08	2023-10-07	1.41602e+07	1
2023-10-08	1.4193e+07	0			0.4	0	0	2.12895e+08	0	2.44365		0	2023-10-08	0.631539		1	0	0	0.590776	0	0	1	0.39392	0.942507	482200	0.011778	0		1.00002	0.962601	0.000261545	0.000185207	0.000260491	00:00:00	240022	2023-10-08			3.37106e+08	2023-10-08	1.41602e+07	1
2023-10-09	1.4193e+07	0			0.4	0	0	2.12895e+08	0	2.45106		0	2023-10-09	0.631528		1	0	0	0.592014	0	0	1	0.393929	0.942507	482500	0.011778	0		1.00002	0.965546	0.000261545	0.000185207	0.000260491	00:00:00	240022	2023-10-09			3.37111e+08	2023-10-09	1.41602e+07	1
2023-10-10	1.4193e+07	0			0.4	0	0	2.12895e+08	0	2.45754		0	2023-10-10	0.631518		1	0	0	0.593089	0	0	1	0.393939	0.942507	482800	0.011778	0		1.00002	0.96812	0.000261545	0.000185207	0.000260491	00:00:00	240022	2023-10-10			3.37117e+08	2023-10-10	1.41602e+07	1
2023-10-11	1.4193e+07	0			0.4	0	0	2.12895e+08	0	2.46306		0	2023-10-11	0.631508		1	0	0	0.594001	0	0	1	0.393949	0.942507	483100	0.011778	0		1.00002	0.97032	0.000261545	0.000185207	0.000260491	00:00:00	240022	2023-10-11			3.37122e+08	2023-10-11	1.41602e+07	1
2023-10-12	1.4193e+07	0			0.4	0	0	2.12895e+08	0	2.46792		0	2023-10-12	0.631497		1	0	0	0.5948	0	0	1	0.393958	0.942507	483400	0.011778	0		1.00002	0.972256	0.000261545	0.000185207	0.000260491	00:00:00	240022	2023-10-12			3.37128e+08	2023-10-12	1.41602e+07	1
2023-10-13	1.4193e+07	0			0.4	0	0	2.12895e+08	0	2.47213		0	2023-10-13	0.631487		1	0	0	0.59549	0	0	1	0.393968	0.942507	483700	0.011778	0		1.00002	0.973939	0.000261545	0.000185207	0.000260491	00:00:00	240022	2023-10-13			3.37133e+08	2023-10-13	1.41602e+07	1
2023-10-14	1.4193e+07	0			0.4	0	0	2.12895e+08	0	2.47578		0	2023-10-14	0.631476		1	0	0	0.596086	0	0	1	0.393977	0.942507	484000	0.011778	0		1.00002	0.9754	0.000261545	0.000185207	0.000260491	00:00:00	240022	2023-10-14			3.37139e+08	2023-10-14	1.41602e+07	1
2023-10-15	1.4193e+07	0			0.4	0	0	2.12895e+08	0	2.47896		0	2023-10-15	0.631466		1	0	0	0.596604	0	0	1	0.393987	0.942507	484300	0.011778	0		1.00002	0.976676	0.000261545	0.000185207	0.000260491	00:00:00	240022	2023-10-15			3.37145e+08	2023-10-15	1.41602e+07	1
2023-10-16	1.4193e+07	0			0.4	0	0	2.12895e+08	0	2.48172		0	2023-10-16	0.631456		1	0	0	0.597053	0	0	1	0.393996	0.942507	484600	0.011778	0		1.00002	0.977787	0.000261545	0.000185207	0.000260491	00:00:00	240022	2023-10-16			3.3715e+08	2023-10-16	1.41602e+07	1
2023-10-17	1.4193e+07	0			0.4	0	0	2.12895e+08	0	2.48411		0	2023-10-17	0.631445		1	0	0	0.597442	0	0	1	0.394006	0.942507	484900	0.011778	0		1.00002	0.978755	0.000261545	0.000185207	0.000260491	00:00:00	240022	2023-10-17			3.37156e+08	2023-10-17	1.41602e+07	1
2023-10-18	1.4193e+07	0			0.4	0	0	2.12895e+08	0	2.4862		0	2023-10-18	0.631435		1	0	0	0.597779	0	0	1	0.394015	0.942507	485200	0.011778	0		1.00002	0.9796	0.000261545	0.000185207	0.000260491	00:00:00	240022	2023-10-18			3.37161e+08	2023-10-18	1.41602e+07	1
2023-10-19	1.4193e+07	0			0.4	0	0	2.12895e+08	0	2.48801		0	2023-10-19	0.631424		1	0	0	0.598072	0	0	1	0.394025	0.942507	485500	0.011778	0		1.00002	0.980337	0.000261545	0.000185207	0.000260491	00:00:00	240022	2023-10-19			3.37167e+08	2023-10-19	1.41602e+07	1
2023-10-20	1.4193e+07	0			0.4	0	0	2.12895e+08	0	2.48958		0	2023-10-20	0.631414		1	0	0	0.598326	0	0	1	0.394035	0.942507	485800	0.011778	0		1.00002	0.98098	0.000261545	0.000185207	0.000260491	00:00:00	240022	2023-10-20			3.37172e+08	2023-10-20	1.41602e+07	1
2023-10-21	1.4193e+07	0			0.4	0	0	2.12895e+08	0	2.49094		0	2023-10-21	0.631404		1	0	0	0.598546	0	0	1	0.394044	0.942507	486100	0.011778	0		1.00002	0.981542	0.000261545	0.000185207	0.000260491	00:00:00	240022	2023-10-21			3.37178e+08	2023-10-21	1.41602e+07	1
2023-10-22	1.4193e+07	0			0.4	0	0	2.12895e+08	0	2.49213		0	2023-10-22	0.631393		1	0	0	0.598737	0	0	1	0.394054	0.942507	486400	0.011778	0		1.00002	0.982034	0.000261545	0.000185207	0.000260491	00:00:00	240022	2023-10-22			3.37183e+08	2023-10-22	1.41602e+07	1
2023-10-23	1.4193e+07	0			0.4	0	0	2.12895e+08	0	2.49316		0	2023-10-23	0.631383		1	0	0	0.598903	0	0	1	0.394063	0.942507	486700	0.011778	0		1.00002	0.982464	0.000261545	0.000185207	0.000260491	00:00:00	240022	2023-10-23			3.37189e+08	2023-10-23	1.41602e+07	1
2023-10-24	1.4193e+07	0			0.4	0	0	2.12895e+08	0	2.49406		0	2023-10-24	0.631373		1	0	0	0.599047	0	0	1	0.394073	0.942507	487000	0.011778	0		1.00002	0.982841	0.000261545	0.000185207	0.000260491	00:00:00	240022	2023-10-24			3.37194e+08	2023-10-24	1.41602e+07	1
2023-10-25	1.4193e+07	0			0.4	0	0	2.12895e+08	0	2.49484		0	2023-10-25	0.631362		1	0	0	0.599173	0	0	1	0.394082	0.942507	487300	0.011778	0		1.00002	0.983172	0.000261545	0.000185207	0.000260491	00:00:00	240022	2023-10-25			3.372e+08	2023-10-25	1.41602e+07	1
2023-10-26	1.4193e+07	0			0.4	0	0	2.12895e+08	0	2.49552		0	2023-10-26	0.631352		1	0	0	0.599281	0	0	1	0.394092	0.942507	487600	0.011778	0		1.00002	0.983463	0.000261545	0.000185207	0.000260491	00:00:00	240022	2023-10-26			3.37205e+08	2023-10-26	1.41602e+07	1
2023-10-27	1.4193e+07	0			0.4	0	0	2.12895e+08	0	2.4961		0	2023-10-27	0.631341		1	0	0	0.599376	0	0	1	0.394102	0.942507	487900	0.011778	0		1.00002	0.983718	0.000261545	0.000185207	0.000260491	00:00:00	240022	2023-10-27			3.37211e+08	2023-10-27	1.41602e+07	1
2023-10-28	1.4193e+07	0			0.4	0	0	2.12895e+08	0	2.49661		0	2023-10-28	0.631331		1	0	0	0.599458	0	0	1	0.394111	0.942507	488200	0.011778	0		1.00002	0.983943	0.000261545	0.000185207	0.000260491	00:00:00	240022	2023-10-28			3.37217e+08	2023-10-28	1.41602e+07	1
2023-10-29	1.4193e+07	0			0.4	0	0	2.12895e+08	0	2.49706		0	2023-10-29	0.631321		1	0	0	0.599529	0	0	1	0.394121	0.942507	488500	0.011778	0		1.00002	0.984142	0.000261545	0.000185207	0.000260491	00:00:00	240022	2023-10-29			3.37222e+08	2023-10-29	1.41602e+07	1
2023-10-30	1.4193e+07	0			0.4	0	0	2.12895e+08	0	2.49744		0	2023-10-30	0.63131		1	0	0	0.599591	0	0	1	0.39413	0.942507	488800	0.011778	0		1.00002	0.984318	0.000261545	0.000185207	0.000260491	00:00:00	240022	2023-10-30			3.37228e+08	2023-10-30	1.41602e+07	1
2023-10-31	1.4193e+07	0			0.4	0	0	2.12895e+08	0	2.49778		0	2023-10-31	0.6313		1	0	0	0.599644	0	0	1	0.39414	0.942507	489100	0.011778	0		1.00002	0.984474	0.000261545	0.000185207	0.000260491	00:00:00	240022	2023-10-31			3.37233e+08	2023-10-31	1.41602e+07	1
2023-11-01	1.4193e+07	0			0.4	0	0	2.12895e+08	0	2.49807		0	2023-11-01	0.63129		1	0	0	0.599691	0	0	1	0.394149	0.942507	489400	0.011778	0		1.00002	0.984613	0.000261545	0.000185207	0.000260491	00:00:00	240022	2023-11-01			3.37239e+08	2023-11-01	1.41602e+07	1
2023-11-02	1.4193e+07	0			0.4	0	0	2.12895e+08	0	2.49832		0	2023-11-02	0.631279		1	0	0	0.599732	0	0	1	0.394159	0.942507	489700	0.011778	0		1.00002	0.984736	0.000261545	0.000185207	0.000260491	00:00:00	240022	2023-11-02			3.37244e+08	2023-11-02	1.41602e+07	1
2023-11-03	1.4193e+07	0			0.4	0	0	2.12895e+08	0	2.49854		0	2023-11-03	0.631269		1	0	0	0.599767	0	0	1	0.394168	0.942507	490000	0.011778	0		1.00002	0.984847	0.000261545	0.000185207	0.000260491	00:00:00	240022	2023-11-03			3.3725e+08	2023-11-03	1.41602e+07	1
2023-11-04	1.4193e+07	0			0.4	0	0	2.12895e+08	0	2.49873		0	2023-11-04	0.631258		1	0	0	0.599797	0	0	1	0.394178	0.942507	490300	0.011778	0		1.00002	0.984946	0.000261545	0.000185207	0.000260491	00:00:00	240022	2023-11-04			3.37255e+08	2023-11-04	1.41602e+07	1
2023-11-05	1.4193e+07	0			0.4	0	0	2.12895e+08	0	2.4989		0	2023-11-05	0.631248		1	0	0	0.599824	0	0	1	0.394188	0.942507	490600	0.011778	0		1.00002	0.985035	0.000261545	0.000185207	0.000260491	00:00:00	240022	2023-11-05			3.37261e+08	2023-11-05	1.41602e+07	1
2023-11-06	1.4193e+07	0			0.4	0	0	2.12895e+08	0	2.49904		0	2023-11-06	0.631238		1	0	0	0.599847	0	0	1	0.394197	0.942507	490900	0.011778	0		1.00002	0.985116	0.000261545	0.000185207	0.000260491	00:00:00	240022	2023-11-06			3.37266e+08	2023-11-06	1.41602e+07	1
2023-11-07	1.4193e+07	0			0.4	0	0	2.12895e+08	0	2.49917		0	2023-11-07	0.631227		1	0	0	0.599867	0	0	1	0.394207	0.942507	491200	0.011778	0		1.00002	0.985189	0.000261545	0.000185207	0.000260491	00:00:00	240022	2023-11-07			3.37272e+08	2023-11-07	1.41602e+07	1
2023-11-08	1.4193e+07	0			0.4	0	0	2.12895e+08	0	2.49928		0	2023-11-08	0.631217		1	0	0	0.599885	0	0	1	0.394216	0.942507	491500	0.011778	0		1.00002	0.985256	0.000261545	0.000185207	0.000260491	00:00:00	240022	2023-11-08			3.37278e+08	2023-11-08	1.41602e+07	1
2023-11-09	1.4193e+07	0			0.4	0	0	2.12895e+08	0	2.49937		0	2023-11-09	0.631207		1	0	0	0.5999	0	0	1	0.394226	0.942507	491800	0.011778	0		1.00002	0.985317	0.000261545	0.000185207	0.000260491	00:00:00	240022	2023-11-09			3.37283e+08	2023-11-09	1.41602e+07	1
2023-11-10	1.4193e+07	0			0.4	0	0	2.12895e+08	0	2.49946		0	2023-11-10	0.631196		1	0	0	0.599913	0	0	1	0.394235	0.942507	492100	0.011778	0		1.00002	0.985374	0.000261545	0.000185207	0.000260491	00:00:00	240022	2023-11-10			3.37289e+08	2023-11-10	1.41602e+07	1
2023-11-11	1.4193e+07	0			0.4	0	0	2.12895e+08	0	2.49953		0	2023-11-11	0.631186		1	0	0	0.599924	0	0	1	0.394245	0.942507	492400	0.011778	0		1.00002	0.985426	0.000261545	0.000185207	0.000260491	00:00:00	240022	2023-11-11			3.37294e+08	2023-11-11	1.41602e+07	1
2023-11-12	1.4193e+07	0			0.4	0	0	2.12895e+08	0	2.49959		0	2023-11-12	0.631175		1	0	0	0.599934	0	0	1	0.394254	0.942507	492700	0.011778	0		1.00002	0.985474	0.000261545	0.000185207	0.000260491	00:00:00	240022	2023-11-12			3.373e+08	2023-11-12	1.41602e+07	1
2023-11-13	1.4193e+07	0			0.4	0	0	2.12895e+08	0	2.49964		0	2023-11-13	0.631165		1	0	0	0.599943	0	0	1	0.394264	0.942507	493000	0.011778	0		1.00002	0.985519	0.000261545	0.000185207	0.000260491	00:00:00	240022	2023-11-13			3.37305e+08	2023-11-13	1.41602e+07	1
2023-11-14	1.4193e+07	0			0.4	0	0	2.12895e+08	0	2.49969		0	2023-11-14	0.631155		1	0	0	0.59995	0	0	1	0.394274	0.942507	493300	0.011778	0		1.00002	0.985561	0.000261545	0.000185207	0.000260491	00:00:00	240022	2023-11-14			3.37311e+08	2023-11-14	1.41602e+07	1
2023-11-15	1.4193e+07	0			0.4	0	0	2.12895e+08	0	2.49973		0	2023-11-15	0.631144		1	0	0	0.599957	0	0	1	0.394283	0.942507	493600	0.011778	0		1.00002	0.985601	0.000261545	0.000185207	0.000260491	00:00:00	240022	2023-11-15			3.37316e+08	2023-11-15	1.41602e+07	1
2023-11-16	1.4193e+07	0			0.4	0	0	2.12895e+08	0	2.49977		0	2023-11-16	0.631134		1	0	0	0.599963	0	0	1	0.394293	0.942507	493900	0.011778	0		1.00002	0.985639	0.000261545	0.000185207	0.000260491	00:00:00	240022	2023-11-16			3.37322e+08	2023-11-16	1.41602e+07	1
2023-11-17	1.4193e+07	0			0.4	0	0	2.12895e+08	0	2.4998		0	2023-11-17	0.631124		1	0	0	0.599967	0	0	1	0.394302	0.942507	494200	0.011778	0		1.00002	0.985675	0.000261545	0.000185207	0.000260491	00:00:00	240022	2023-11-17			3.37327e+08	2023-11-17	1.41602e+07	1
2023-11-18	1.4193e+07	0			0.4	0	0	2.12895e+08	0	2.49982		0	2023-11-18	0.631113		1	0	0	0.599972	0	0	1	0.394312	0.942507	494500	0.011778	0		1.00002	0.98571	0.000261545	0.000185207	0.000260491	00:00:00	240022	2023-11-18			3.37333e+08	2023-11-18	1.41602e+07	1
2023-11-19	1.4193e+07	0			0.4	0	0	2.12895e+08	0	2.49985		0	2023-11-19	0.631103		1	0	0	0.599975	0	0	1	0.394321	0.942507	494800	0.011778	0		1.00002	0.985743	0.000261545	0.000185207	0.000260491	00:00:00	240022	2023-11-19			3.37339e+08	2023-11-19	1.41602e+07	1
2023-11-20	1.4193e+07	0			0.4	0	0	2.12895e+08	0	2.49987		0	2023-11-20	0.631092		1	0	0	0.599979	0	0	1	0.394331	0.942507	495100	0.011778	0		1.00002	0.985775	0.000261545	0.000185207	0.000260491	00:00:00	240022	2023-11-20			3.37344e+08	2023-11-20	1.41602e+07	1
2023-11-21	1.4193e+07	0			0.4	0	0	2.12895e+08	0	2.49988		0	2023-11-21	0.631082		1	0	0	0.599981	0	0	1	0.39434	0.942507	495400	0.011778	0		1.00002	0.985805	0.000261545	0.000185207	0.000260491	00:00:00	240022	2023-11-21			3.3735e+08	2023-11-21	1.41602e+07	1
2023-11-22	1.4193e+07	0			0.4	0	0	2.12895e+08	0	2.4999		0	2023-11-22	0.631072		1	0	0	0.599984	0	0	1	0.39435	0.942507	495700	0.011778	0		1.00002	0.985835	0.000261545	0.000185207	0.000260491	00:00:00	240022	2023-11-22			3.37355e+08	2023-11-22	1.41602e+07	1
2023-11-23	1.4193e+07	0			0.4	0	0	2.12895e+08	0	2.49991		0	2023-11-23	0.631061		1	0	0	0.599986	0	0	1	0.39436	0.942507	496000	0.011778	0		1.00002	0.985864	0.000261545	0.000185207	0.000260491	00:00:00	240022	2023-11-23			3.37361e+08	2023-11-23	1.41602e+07	1
2023-11-24	1.4193e+07	0			0.4	0	0	2.12895e+08	0	2.49992		0	2023-11-24	0.631051		1	0	0	0.599988	0	0	1	0.394369	0.942507	496300	0.011778	0		1.00002	0.985893	0.000261545	0.000185207	0.000260491	00:00:00	240022	2023-11-24			3.37366e+08	2023-11-24	1.41602e+07	1
2023-11-25	1.4193e+07	0			0.4	0	0	2.12895e+08	0	2.49993		0	2023-11-25	0.631041		1	0	0	0.599989	0	0	1	0.394379	0.942507	496600	0.011778	0		1.00002	0.985921	0.000261545	0.000185207	0.000260491	00:00:00	240022	2023-11-25			3.37372e+08	2023-11-25	1.41602e+07	1
2023-11-26	1.4193e+07	0			0.4	0	0	2.12895e+08	0	2.49994		0	2023-11-26	0.63103		1	0	0	0.599991	0	0	1	0.394388	0.942507	496900	0.011778	0		1.00002	0.985948	0.000261545	0.000185207	0.000260491	00:00:00	240022	2023-11-26			3.37377e+08	2023-11-26	1.41602e+07	1
2023-11-27	1.4193e+07	0			0.4	0	0	2.12895e+08	0	2.49995		0	2023-11-27	0.63102		1	0	0	0.599992	0	0	1	0.394398	0.942507	497200	0.011778	0		1.00002	0.985975	0.000261545	0.000185207	0.000260491	00:00:00	240022	2023-11-27			3.37383e+08	2023-11-27	1.41602e+07	1
2023-11-28	1.4193e+07	0			0.4	0	0	2.12895e+08	0	2.49996		0	2023-11-28	0.631009		1	0	0	0.599993	0	0	1	0.394407	0.942507	497500	0.011778	0		1.00002	0.986001	0.000261545	0.000185207	0.000260491	00:00:00	240022	2023-11-28			3.37388e+08	2023-11-28	1.41602e+07	1
2023-11-29	1.4193e+07	0			0.4	0	0	2.12895e+08	0	2.49996		0	2023-11-29	0.630999		1	0	0	0.599994	0	0	1	0.394417	0.942507	497800	0.011778	0		1.00002	0.986027	0.000261545	0.000185207	0.000260491	00:00:00	240022	2023-11-29			3.37394e+08	2023-11-29	1.41602e+07	1
2023-11-30	1.4193e+07	0			0.4	0	0	2.12895e+08	0	2.49997		0	2023-11-30	0.630989		1	0	0	0.599995	0	0	1	0.394426	0.942507	498100	0.011778	0		1.00002	0.986053	0.000261545	0.000185207	0.000260491	00:00:00	240022	2023-11-30			3.374e+08	2023-11-30	1.41602e+07	1
2023-12-01	1.4193e+07	0			0.4	0	0	2.12895e+08	0	2.49997		0	2023-12-01	0.630978		1	0	0	0.599995	0	0	1	0.394436	0.942507	498400	0.011778	0		1.00002	0.986079	0.000261545	0.000185207	0.000260491	00:00:00	240022	2023-12-01			3.37405e+08	2023-12-01	1.41602e+07	1
2023-12-02	1.4193e+07	0			0.4	0	0	2.12895e+08	0	2.49998		0	2023-12-02	0.630968		1	0	0	0.599996	0	0	1	0.394446	0.942507	498700	0.011778	0		1.00002	0.986104	0.000261545	0.000185207	0.000260491	00:00:00	240022	2023-12-02			3.37411e+08	2023-12-02	1.41602e+07	1
2023-12-03	1.4193e+07	0			0.4	0	0	2.12895e+08	0	2.49998		0	2023-12-03	0.630958		1	0	0	0.599997	0	0	1	0.394455	0.942507	499000	0.011778	0		1.00002	0.986129	0.000261545	0.000185207	0.000260491	00:00:00	240022	2023-12-03			3.37416e+08	2023-12-03	1.41602e+07	1
2023-12-04	1.4193e+07	0			0.4	0	0	2.12895e+08	0	2.49998		0	2023-12-04	0.630947		1	0	0	0.599997	0	0	1	0.394465	0.942507	499300	0.011778	0		1.00002	0.986154	0.000261545	0.000185207	0.000260491	00:00:00	240022	2023-12-04			3.37422e+08	2023-12-04	1.41602e+07	1
2023-12-05	1.4193e+07	0			0.4	0	0	2.12895e+08	0	2.49998		0	2023-12-05	0.630937		1	0	0	0.599997	0	0	1	0.394474	0.942507	499600	0.011778	0		1.00002	0.986179	0.000261545	0.000185207	0.000260491	00:00:00	240022	2023-12-05			3.37427e+08	2023-12-05	1.41602e+07	1
2023-12-06	1.4193e+07	0			0.4	0	0	2.12895e+08	0	2.49999		0	2023-12-06	0.630926		1	0	0	0.599998	0	0	1	0.394484	0.942507	499900	0.011778	0		1.00002	0.986204	0.000261545	0.000185207	0.000260491	00:00:00	240022	2023-12-06			3.37433e+08	2023-12-06	1.41602e+07	1
2023-12-07	1.4193e+07	0			0.4	0	0	2.12895e+08	0	2.49999		0	2023-12-07	0.630916		1	0	0	0.599998	0	0	1	0.394493	0.942507	500200	0.011778	0		1.00002	0.986228	0.000261545	0.000185207	0.000260491	00:00:00	240022	2023-12-07			3.37438e+08	2023-12-07	1.41602e+07	1
2023-12-08	1.4193e+07	0			0.4	0	0	2.12895e+08	0	2.49999		0	2023-12-08	0.630906		1	0	0	0.599998	0	0	1	0.394503	0.942507	500500	0.011778	0		1.00002	0.986253	0.000261545	0.000185207	0.000260491	00:00:00	240022	2023-12-08			3.37444e+08	2023-12-08	1.41602e+07	1
2023-12-09	1.4193e+07	0			0.4	0	0	2.12895e+08	0	2.49999		0	2023-12-09	0.630895		1	0	0	0.599999	0	0	1	0.394512	0.942507	500800	0.011778	0		1.00002	0.986277	0.000261545	0.000185207	0.000260491	00:00:00	240022	2023-12-09			3.37449e+08	2023-12-09	1.41602e+07	1
2023-12-10	1.4193e+07	0			0.4	0	0	2.12895e+08	0	2.49999		0	2023-12-10	0.630885		1	0	0	0.599999	0	0	1	0.394522	0.942507	501100	0.011778	0		1.00002	0.986302	0.000261545	0.000185207	0.000260491	00:00:00	240022	2023-12-10			3.37455e+08	2023-12-10	1.41602e+07	1
2023-12-11	1.4193e+07	0			0.4	0	0	2.12895e+08	0	2.49999		0	2023-12-11	0.630875		1	0	0	0.599999	0	0	1	0.394532	0.942507	501400	0.011778	0		1.00002	0.986326	0.000261545	0.000185207	0.000260491	00:00:00	240022	2023-12-11			3.37461e+08	2023-12-11	1.41602e+07	1
2023-12-12	1.4193e+07	0			0.4	0	0	2.12895e+08	0	2.49999		0	2023-12-12	0.630864		1	0	0	0.599999	0	0	1	0.394541	0.942507	501700	0.011778	0		1.00002	0.98635	0.000261545	0.000185207	0.000260491	00:00:00	240022	2023-12-12			3.37466e+08	2023-12-12	1.41602e+07	1
2023-12-13	1.4193e+07	0			0.4	0	0	2.12895e+08	0	2.49999		0	2023-12-13	0.630854		1	0	0	0.599999	0	0	1	0.394551	0.942507	502000	0.011778	0		1.00002	0.986374	0.000261545	0.000185207	0.000260491	00:00:00	240022	2023-12-13			3.37472e+08	2023-12-13	1.41602e+07	1
2023-12-14	1.4193e+07	0			0.4	0	0	2.12895e+08	0	2.5		0	2023-12-14	0.630843		1	0	0	0.599999	0	0	1	0.39456	0.942507	502300	0.011778	0		1.00002	0.986399	0.000261545	0.000185207	0.000260491	00:00:00	240022	2023-12-14			3.37477e+08	2023-12-14	1.41602e+07	1
2023-12-15	1.4193e+07	0			0.4	0	0	2.12895e+08	0	2.5		0	2023-12-15	0.630833		1	0	0	0.599999	0	0	1	0.39457	0.942507	502600	0.011778	0		1.00002	0.986423	0.000261545	0.000185207	0.000260491	00:00:00	240022	2023-12-15			3.37483e+08	2023-12-15	1.41602e+07	1
2023-12-16	1.4193e+07	0			0.4	0	0	2.12895e+08	0	2.5		0	2023-12-16	0.630823		1	0	0	0.599999	0	0	1	0.394579	0.942507	502900	0.011778	0		1.00002	0.986447	0.000261545	0.000185207	0.000260491	00:00:00	240022	2023-12-16			3.37488e+08	2023-12-16	1.41602e+07	1
2023-12-17	1.4193e+07	0			0.4	0	0	2.12895e+08	0	2.5		0	2023-12-17	0.630812		1	0	0	0.6	0	0	1	0.394589	0.942507	503200	0.011778	0		1.00002	0.986471	0.000261545	0.000185207	0.000260491	00:00:00	240022	2023-12-17			3.37494e+08	2023-12-17	1.41602e+07	1
2023-12-18	1.4193e+07	0			0.4	0	0	2.12895e+08	0	2.5		0	2023-12-18	0.630802		1	0	0	0.6	0	0	1	0.394598	0.942507	503500	0.011778	0		1.00002	0.986495	0.000261545	0.000185207	0.000260491	00:00:00	240022	2023-12-18			3.37499e+08	2023-12-18	1.41602e+07	1
2023-12-19	1.4193e+07	0			0.4	0	0	2.12895e+08	0	2.5		0	2023-12-19	0.630792		1	0	0	0.6	0	0	1	0.394608	0.942507	503800	0.011778	0		1.00002	0.986519	0.000261545	0.000185207	0.000260491	00:00:00	240022	2023-12-19			3.37505e+08	2023-12-19	1.41602e+07	1
2023-12-20	1.4193e+07	0			0.4	0	0	2.12895e+08	0	2.5		0	2023-12-20	0.630781		1	0	0	0.6	0	0	1	0.394617	0.942507	504100	0.011778	0		1.00002	0.986543	0.000261545	0.000185207	0.000260491	00:00:00	240022	2023-12-20			3.3751e+08	2023-12-20	1.41602e+07	1
2023-12-21	1.4193e+07	0			0.4	0	0	2.12895e+08	0	2.5		0	2023-12-21	0.630771		1	0	0	0.6	0	0	1	0.394627	0.942507	504400	0.011778	0		1.00002	0.986567	0.000261545	0.000185207	0.000260491	00:00:00	240022	2023-12-21			3.37516e+08	2023-12-21	1.41602e+07	1
2023-12-22	1.4193e+07	0			0.4	0	0	2.12895e+08	0	2.5		0	2023-12-22	0.630761		1	0	0	0.6	0	0	1	0.394637	0.942507	504700	0.011778	0		1.00002	0.986591	0.000261545	0.000185207	0.000260491	00:00:00	240022	2023-12-22			3.37522e+08	2023-12-22	1.41602e+07	1
2023-12-23	1.4193e+07	0			0.4	0	0	2.12895e+08	0	2.5		0	2023-12-23	0.63075		1	0	0	0.6	0	0	1	0.394646	0.942507	505000	0.011778	0		1.00002	0.986615	0.000261545	0.000185207	0.000260491	00:00:00	240022	2023-12-23			3.37527e+08	2023-12-23	1.41602e+07	1
2023-12-24	1.4193e+07	0			0.4	0	0	2.12895e+08	0	2.5		0	2023-12-24	0.63074		1	0	0	0.6	0	0	1	0.394656	0.942507	505300	0.011778	0		1.00002	0.986639	0.000261545	0.000185207	0.000260491	00:00:00	240022	2023-12-24			3.37533e+08	2023-12-24	1.41602e+07	1
2023-12-25	1.4193e+07	0			0.4	0	0	2.12895e+08	0	2.5		0	2023-12-25	0.630729		1	0	0	0.6	0	0	1	0.394665	0.942507	505600	0.011778	0		1.00002	0.986663	0.000261545	0.000185207	0.000260491	00:00:00	240022	2023-12-25			3.37538e+08	2023-12-25	1.41602e+07	1
2023-12-26	1.4193e+07	0			0.4	0	0	2.12895e+08	0	2.5		0	2023-12-26	0.630719		1	0	0	0.6	0	0	1	0.394675	0.942507	505900	0.011778	0		1.00002	0.986687	0.000261545	0.000185207	0.000260491	00:00:00	240022	2023-12-26			3.37544e+08	2023-12-26	1.41602e+07	1
2023-12-27	1.4193e+07	0			0.4	0	0	2.12895e+08	0	2.5		0	2023-12-27	0.630709		1	0	0	0.6	0	0	1	0.394684	0.942507	506200	0.011778	0		1.00002	0.986711	0.000261545	0.000185207	0.000260491	00:00:00	240022	2023-12-27			3.37549e+08	2023-12-27	1.41602e+07	1
2023-12-28	1.4193e+07	0			0.4	0	0	2.12895e+08	0	2.5		0	2023-12-28	0.630698		1	0	0	0.6	0	0	1	0.394694	0.942507	506500	0.011778	0		1.00002	0.986734	0.000261545	0.000185207	0.000260491	00:00:00	240022	2023-12-28			3.37555e+08	2023-12-28	1.41602e+07	1
2023-12-29	1.4193e+07	0			0.4	0	0	2.12895e+08	0	2.5		0	2023-12-29	0.630688		1	0	0	0.6	0	0	1	0.394703	0.942507	506800	0.011778	0		1.00002	0.986758	0.000261545	0.000185207	0.000260491	00:00:00	240022	2023-12-29			3.3756e+08	2023-12-29	1.41602e+07	1
2023-12-30	1.4193e+07	0			0.4	0	0	2.12895e+08	0	2.5		0	2023-12-30	0.630678		1	0	0	0.6	0	0	1	0.394713	0.942507	507100	0.011778	0		1.00002	0.986782	0.000261545	0.000185207	0.000260491	00:00:00	240022	2023-12-30			3.37566e+08	2023-12-30	1.41602e+07	1
2023-12-31	1.4193e+07	0			0.4	0	0	2.12895e+08	0	2.5		0	2023-12-31	0.630667		1	0	0	0.6	0	0	1	0.394723	0.942507	507400	0.011778	0		1.00002	0.986806	0.000261545	0.000185207	0.000260491	00:00:00	240022	2023-12-31			3.37572e+08	2023-12-31	1.41602e+07	1
2024-01-01	1.4193e+07	0			0.4	0	0	2.12895e+08	0	2.5		0	2024-01-01	0.630657		1	0	0	0.6	0	0	1	0.394732	0.942507	507700	0.011778	0		1.00002	0.98683	0.000261545	0.000185207	0.000260491	00:00:00	240022	2024-01-01			3.37577e+08	2024-01-01	1.41602e+07	1
2024-01-02	1.4193e+07	0			0.4	0	0	2.12895e+08	0	2.5		0	2024-01-02	0.630646		1	0	0	0.6	0	0	1	0.394742	0.942507	508000	0.011778	0		1.00002	0.986854	0.000261545	0.000185207	0.000260491	00:00:00	240022	2024-01-02			3.37583e+08	2024-01-02	1.41602e+07	1
2024-01-03	1.4193e+07	0			0.4	0	0	2.12895e+08	0	2.5		0	2024-01-03	0.630636		1	0	0	0.6	0	0	1	0.394751	0.942507	508300	0.011778	0		1.00002	0.986878	0.000261545	0.000185207	0.000260491	00:00:00	240022	2024-01-03			3.37588e+08	2024-01-03	1.41602e+07	1
2024-01-04	1.4193e+07	0			0.4	0	0	2.12895e+08	0	2.5		0	2024-01-04	0.630626		1	0	0	0.6	0	0	1	0.394761	0.942507	508600	0.011778	0		1.00002	0.986902	0.000261545	0.000185207	0.000260491	00:00:00	240022	2024-01-04			3.37594e+08	2024-01-04	1.41602e+07	1
2024-01-05	1.4193e+07	0			0.4	0	0	2.12895e+08	0	2.5		0	2024-01-05	0.630615		1	0	0	0.6	0	0	1	0.39477	0.942507	508900	0.011778	0		1.00002	0.986926	0.000261545	0.000185207	0.000260491	00:00:00	240022	2024-01-05			3.37599e+08	2024-01-05	1.41602e+07	1
2024-01-06	1.4193e+07	0			0.4	0	0	2.12895e+08	0	2.5		0	2024-01-06	0.630605		1	0	0	0.6	0	0	1	0.39478	0.942507	509200	0.011778	0		1.00002	0.986949	0.000261545	0.000185207	0.000260491	00:00:00	240022	2024-01-06			3.37605e+08	2024-01-06	1.41602e+07	1
2024-01-07	1.4193e+07	0			0.4	0	0	2.12895e+08	0	2.5		0	2024-01-07	0.630595		1	0	0	0.6	0	0	1	0.394789	0.942507	509500	0.011778	0		1.00002	0.986973	0.000261545	0.000185207	0.000260491	00:00:00	240022	2024-01-07			3.3761e+08	2024-01-07	1.41602e+07	1
2024-01-08	1.4193e+07	0			0.4	0	0	2.12895e+08	0	2.5		0	2024-01-08	0.630584		1	0	0	0.6	0	0	1	0.394799	0.942507	509800	0.011778	0		1.00002	0.986997	0.000261545	0.000185207	0.000260491	00:00:00	240022	2024-01-08			3.37616e+08	2024-01-08	1.41602e+07	1
2024-01-09	1.4193e+07	0			0.4	0	0	2.12895e+08	0	2.5		0	2024-01-09	0.630574		1	0	0	0.6	0	0	1	0.394808	0.942507	510100	0.011778	0		1.00002	0.987021	0.000261545	0.000185207	0.000260491	00:00:00	240022	2024-01-09			3.37621e+08	2024-01-09	1.41602e+07	1
2024-01-10	1.4193e+07	0			0.4	0	0	2.12895e+08	0	2.5		0	2024-01-10	0.630564		1	0	0	0.6	0	0	1	0.394818	0.942507	510400	0.011778	0		1.00002	0.987045	0.000261545	0.000185207	0.000260491	00:00:00	240022	2024-01-10			3.37627e+08	2024-01-10	1.41602e+07	1
2024-01-11	1.4193e+07	0			0.4	0	0	2.12895e+08	0	2.5		0	2024-01-11	0.630553		1	0	0	0.6	0	0	1	0.394828	0.942507	510700	0.011778	0		1.00002	0.987069	0.000261545	0.000185207	0.000260491	00:00:00	240022	2024-01-11			3.37633e+08	2024-01-11	1.41602e+07	1
2024-01-12	1.4193e+07	0			0.4	0	0	2.12895e+08	0	2.5		0	2024-01-12	0.630543		1	0	0	0.6	0	0	1	0.394837	0.942507	511000	0.011778	0		1.00002	0.987093	0.000261545	0.000185207	0.000260491	00:00:00	240022	2024-01-12			3.37638e+08	2024-01-12	1.41602e+07	1
2024-01-13	1.4193e+07	0			0.4	0	0	2.12895e+08	0	2.5		0	2024-01-13	0.630532		1	0	0	0.6	0	0	1	0.394847	0.942507	511300	0.011778	0		1.00002	0.987117	0.000261545	0.000185207	0.000260491	00:00:00	240022	2024-01-13			3.37644e+08	2024-01-13	1.41602e+07	1
2024-01-14	1.4193e+07	0			0.4	0	0	2.12895e+08	0	2.5		0	2024-01-14	0.630522		1	0	0	0.6	0	0	1	0.394856	0.942507	511600	0.011778	0		1.00002	0.98714	0.000261545	0.000185207	0.000260491	00:00:00	240022	2024-01-14			3.37649e+08	2024-01-14	1.41602e+07	1
2024-01-15	1.4193e+07	0			0.4	0	0	2.12895e+08	0	2.5		0	2024-01-15	0.630512		1	0	0	0.6	0	0	1	0.394866	0.942507	511900	0.011778	0		1.00002	0.987164	0.000261545	0.000185207	0.000260491	00:00:00	240022	2024-01-15			3.37655e+08	2024-01-15	1.41602e+07	1
2024-01-16	1.4193e+07	0			0.4	0	0	2.12895e+08	0	2.5		0	2024-01-16	0.630501		1	0	0	0.6	0	0	1	0.394875	0.942507	512200	0.011778	0		1.00002	0.987188	0.000261545	0.000185207	0.000260491	00:00:00	240022	2024-01-16			3.3766e+08	2024-01-16	1.41602e+07	1
2024-01-17	1.4193e+07	0			0.4	0	0	2.12895e+08	0	2.5		0	2024-01-17	0.630491		1	0	0	0.6	0	0	1	0.394885	0.942507	512500	0.011778	0		1.00002	0.987212	0.000261545	0.000185207	0.000260491	00:00:00	240022	2024-01-17			3.37666e+08	2024-01-17	1.41602e+07	1
2024-01-18	1.4193e+07	0			0.4	0	0	2.12895e+08	0	2.5		0	2024-01-18	0.630481		1	0	0	0.6	0	0	1	0.394894	0.942507	512800	0.011778	0		1.00002	0.987236	0.000261545	0.000185207	0.000260491	00:00:00	240022	2024-01-18			3.37671e+08	2024-01-18	1.41602e+07	1
2024-01-19	1.4193e+07	0			0.4	0	0	2.12895e+08	0	2.5		0	2024-01-19	0.63047		1	0	0	0.6	0	0	1	0.394904	0.942507	513100	0.011778	0		1.00002	0.98726	0.000261545	0.000185207	0.000260491	00:00:00	240022	2024-01-19			3.37677e+08	2024-01-19	1.41602e+07	1
2024-01-20	1.4193e+07	0			0.4	0	0	2.12895e+08	0	2.5		0	2024-01-20	0.63046		1	0	0	0.6	0	0	1	0.394913	0.942507	513400	0.011778	0		1.00002	0.987284	0.000261545	0.000185207	0.000260491	00:00:00	240022	2024-01-20			3.37683e+08	2024-01-20	1.41602e+07	1
2024-01-21	1.4193e+07	0			0.4	0	0	2.12895e+08	0	2.5		0	2024-01-21	0.63045		1	0	0	0.6	0	0	1	0.394923	0.942507	513700	0.011778	0		1.00002	0.987308	0.000261545	0.000185207	0.000260491	00:00:00	240022	2024-01-21			3.37688e+08	2024-01-21	1.41602e+07	1
2024-01-22	1.4193e+07	0			0.4	0	0	2.12895e+08	0	2.5		0	2024-01-22	0.630439		1	0	0	0.6	0	0	1	0.394933	0.942507	514000	0.011778	0		1.00002	0.987331	0.000261545	0.000185207	0.000260491	00:00:00	240022	2024-01-22			3.37694e+08	2024-01-22	1.41602e+07	1
2024-01-23	1.4193e+07	0			0.4	0	0	2.12895e+08	0	2.5		0	2024-01-23	0.630429		1	0	0	0.6	0	0	1	0.394942	0.942507	514300	0.011778	0		1.00002	0.987355	0.000261545	0.000185207	0.000260491	00:00:00	240022	2024-01-23			3.37699e+08	2024-01-23	1.41602e+07	1
[truncated: 3,592 more rows]

## Sheet: US-daily
2020-05-15	2021-03-01	2021-09-01	2021-03-01	2020-08-15	2020-11-01	2021-02-01	scale all unlocks by	0-main region, 1-subregion, 2-without sub	Use Daily Intermittent Unlock->1	UNLOCK ALL->1	Initial & Unlocked R0	Total / Known case ratio	Mortality as % of vent cases enter at right	FINAL CASES	Econ Cost % 18-month lock down	Total Est. Deaths	Use proportional vent. alloc.	Initial Known Cases on Vent.	Spreading Window (Days)	Case Duration	Vents per capita	Vents avail for current region	Vents main region	Vents subregion (if not auto alloc)	Pre-Peak Vent. Util. Target	MWFSa or late Vent. Util. Target	TTSu Vent. Util. Target	Population	Population main region	Population subregion (e.g. NY St.)	Name of main region	Name of sub-region	Ventil mfg rate/day	Change per day in crit cases on vent (.01%=half in 1 yr.)	region mortality % of vent cases	sub-region mortality % of vent cases	region w/o sub-region mortality % vent cases	immunity wears off (days)	population growth rate	RECURRENT EPIDEMIC 01/23/21	economic efficiency of unlock	low season start month	low season duration (months)	low season R0 max reduction
[truncated: 999 more rows]

[truncated: 8 more sheets: endemic plots, World-likely, World-daily, profiles, Analysis, US-exp, US-exp2, NYNJCT]
